# Supplementary material for: Identification of novel activators of the metal responsive transcription factor (MTF-1) using a gene expression biomarker in a microarray compendium
Source: Royal Society of Chemistry journal article supplement (doi:10.1039/d0mt00071j), 2020-07-06
Supplement: d0mt00071j1.xlsx [file d0mt00071j1.xlsx]

## Sheet: MTF-1 biomarker genes
Gene	Avg fold change
MT1M	82.2454
MT1H	26.2025
MT1F	18.7099
MT1G	18.1679
MT1X	16.261
HMOX1	14.9946
MT2A	13.4638
MT1E	12.3758
AKR1C2	5.65967
ATF3	4.80361
CLU	4.24731
SLC30A1	3.77338
SESN2	3.7695
VLDLR	3.51524
PMAIP1	3.33818
SQSTM1	3.10593
SLC7A5	2.8981
AGPAT9	2.69218
MTHFD2	2.66221
MAP1A	2.62808
LGALS8	2.54968
GDF15	2.33473
SEL1L3	2.33114
UBC	2.24823
PPP1R15A	2.15118
DNAJB6	2.14206
PIM1	2.11907
MAFG	2.10903
IFRD1	2.06547
TNFSF9	2.00504
FTH1	1.95685
IFIT3	1.93932
AFF4	1.93017
BACH1	1.8777
WARS	1.84904
GCLC	1.81626
FAM129A	1.78902
MAP1LC3B	1.75806
SLC38A2	1.71822
RIT1	1.68783
ABHD4	1.68428
GLA	1.67326
KDM6A	1.6406
TPP1	1.64011
NINJ1	1.623
TARS	1.56873
TFE3	1.53877
IGF2R	1.50464
MPHOSPH9	-1.50252
PTRH2	-1.50586
ZBED5	-1.51397
TUBGCP4	-1.51978
ARL5A	-1.53269
NOP14	-1.5349
GTF3C2	-1.5376
SEC62	-1.56258
FAM216A	-1.57249
TMTC4	-1.57853
SHQ1	-1.58934
DLGAP5	-1.59419
PALB2	-1.59633
HNRNPR	-1.60633
EID1	-1.60858
SNCA	-1.60982
UBE2G2	-1.61704
MLEC	-1.63403
CIAO1	-1.63941
GNB4	-1.65798
FEN1	-1.6894
TOR3A	-1.73415
DDX23	-1.77878
MRPS12	-1.78176
ITGA4	-1.79964
GEMIN6	-1.80408
RSAD1	-1.84342
NUFIP1	-1.88094
PFAS	-2.04793
FRMD4A	-2.24346
GINS2	-2.256
RBM12	-3.0258
GCNT1	-3.05437

## Sheet: Biomarker -log(p-values)
Bioset Name	Biomarker -log(p-value)	Category	Factor	Public ID	BioSource
Colorectal cancer Caco-2 cells 6hr treated with 110nM AgNPs _vs_ untreated controls	25.2924	Chemical	Silver Nanoparticles	GSE84982	Caco-2 Cell Line
Colorectal cancer Caco-2 cells 24hr treated with 20nM AgNPs _vs_ untreated controls	22.7696	Chemical	Silver Nanoparticles	GSE84982	Caco-2 Cell Line
Colorectal cancer Caco-2 cells 24hr treated with 60nM AgNPs _vs_ untreated controls	21.8539	Chemical	Silver Nanoparticles	GSE84982	Caco-2 Cell Line
Multiple myeloma cell lines treated with arsenic trioxide 6hr _vs_ control	21.585	Chemical	arsenic trioxide	GSE14519	Cell line
Colorectal cancer Caco-2 cells 24hr treated with 30nM AgNPs _vs_ untreated controls	21.3468	Chemical	Silver Nanoparticles	GSE84982	Caco-2 Cell Line
PC3 cells + mefloquine, 9.6uM _vs_ DMSO vehicle	21.0862	Chemical	Mefloquine	GSE5258	PC-3 Cell Line [prostate cancer]
Colorectal cancer Caco-2 cells 24hr treated with 110nM AgNPs _vs_ untreated controls	20.1192	Chemical	Silver Nanoparticles	GSE84982	Caco-2 Cell Line
Breast adenocarcinoma MCF-7 cells 6hr treated with 20nM AgNPs _vs_ untreated controls	19.6383	Chemical	Silver Nanoparticles	GSE84982	MCF7 Cell Line
Colorectal cancer Caco-2 cells 6hr treated with 20nM AgNPs _vs_ untreated controls	19.1079	Chemical	Silver Nanoparticles	GSE84982	Caco-2 Cell Line
Bronchial epithelial cells 4hr post-15min cigarette smoke exposure _vs_ air exposure	18.1871	Chemical	Tobacco smoke	GSE10718	Primary cells
Neuroepithelial progenitors from ESCs in 6d + 4-chloromercuribenzoic acid _vs_ culture medium only	18.0605	Chemical	p-Chloromercuribenzoic Acid	GSE71127	Primary cells - cultured
Multiple myeloma cell lines treated with arsenic trioxide 48hr _vs_ control	17.9586	Chemical	arsenic trioxide	GSE14519	Cell line
Colorectal cancer Caco-2 cells 6hr treated with 1.5ug/ml AgNO3 _vs_ untreated controls	17.585	Chemical	Silver Nitrate	GSE84982	Caco-2 Cell Line
Liver cell line + Cys for 36hr followed by - Cys for 6hr _vs_ + Cys	17.5686	Chemical	Cysteine	GSE9517	C3A Cell Line
PC3 cells + alexidine, 6.8uM _vs_ DMSO vehicle	17.3665	Chemical	alexidine	GSE5258	PC-3 Cell Line [prostate cancer]
MCF7 cells + 15-delta prostaglandin J2, 10uM _vs_ DMSO vehicle	17.2366	Chemical	15-deoxy-delta(12,14)-prostaglandin J2	GSE5258	MCF7 Cell Line
Embryonic stem WA09 cells treated 48hr with 10mM tetraethylammonium _vs_ mock controls	16.9586	Chemical	Tetraethylammonium	GSE90826	H9 Stem Cell Line
MCF7 cells + fluorometholone, 10.6uM _vs_ DMSO vehicle	16.7959	Chemical	Fluorometholone	GSE5258	MCF7 Cell Line
Multiple myeloma cell lines treated with arsenic trioxide 24hr _vs_ control	16.5528	Chemical	arsenic trioxide	GSE14519	Cell line
Skin BJ fibroblasts with 5ug/mL actinomycin D 2hr - 1uM sodium arsenite 24hr pre-treated _vs_ water	16.4949	Chemical	sodium arsenite	GSE57051	BJ Cell Line [foreskin]
NHBE cells 8hr post-exposure to 15min of light cigarette smoke _vs_ mock exposure	16.4815	Chemical	Tobacco smoke	GSE10700	Primary cells
Skin BJ fibroblasts without actinomycin D - 1uM sodium arsenite 24hr pre-treated _vs_ water	16.3872	Chemical	sodium arsenite	GSE57051	BJ Cell Line [foreskin]
T cell Jurkat A3 cells treated 6hr with 10ug/mL ZnO particles _vs_ 6hr untreated	16.0757	Chemical	Zinc Oxide Nanoparticles	GSE39444	A3 Cell Line
NHBE cells 4hr post-exposure to 15min of light cigarette smoke _vs_ mock exposure	15.9586	Chemical	Tobacco smoke	GSE10700	Primary cells
Breast cancer T-47D cells (ER+) + 10uM GW3965 (LXR agonist) for 48hr _vs_ control (ethanol)	15.8539	Chemical	GW 3965	GSE34987	T-47D Cell Line
PC3 cells + phenoxybenzamine, 11.8uM _vs_ DMSO vehicle	15.6576	Chemical	Phenoxybenzamine	GSE5258	PC-3 Cell Line [prostate cancer]
MCF7 cells + 5224221, 12uM _vs_ DMSO vehicle	15.4437	Chemical	5224221	GSE5258	MCF7 Cell Line
PC3 cells + astemizole, 8.8uM _vs_ DMSO vehicle	15.2441	Chemical	Astemizole	GSE5258	PC-3 Cell Line [prostate cancer]
Colorectal cancer Caco-2 cells 6hr treated with 30nM AgNPs _vs_ untreated controls	15.0706	Chemical	Silver Nanoparticles	GSE84982	Caco-2 Cell Line
HCT116 colon cancer cells + NO 8hr _vs_ untreated control	15.0706	Chemical	Nitric Oxide	GSE3176	HCT 116 Cell Line
GC-diffuse large B cell lymphoma SU-DHL-6 cells treated 12hr with 50uM FX1 _vs_ DMSO	15.0362	Chemical	FX1	GSE79888	SU-DHL-6 Cell Line
Olfactory neurosphere cells - 25ug/ml coated MAX ZnO nanoparticle treated 6hr _vs_ untreated	15.0362	Chemical	Zinc Oxide Nanoparticles	GSE45322	Primary cells - cultured
Skin BJ fibroblasts with 5ug/mL actinomycin D 4hr - 1uM sodium arsenite 24hr pre-treated _vs_ water	14.9586	Chemical	sodium arsenite	GSE57051	BJ Cell Line [foreskin]
Neuroepithelial progenitors from ESCs in 6d + phenylmercuric acetate _vs_ culture medium only	14.9208	Chemical	Phenylmercuric Acetate	GSE71127	Primary cells - cultured
Skin BJ fibroblasts with 5ug/mL actinomycin D 1hr - 1uM sodium arsenite 24hr pre-treated _vs_ water	14.9208	Chemical	sodium arsenite	GSE57051	BJ Cell Line [foreskin]
MCF7 breast cancer cells + 50nM Bortezomib 15min _vs_ untreated control	14.8861	Chemical	bortezomib	GSE30931	MCF7 Cell Line
MCF7 cells + phenoxybenzamine, 11.8uM _vs_ DMSO vehicle	14.8861	Chemical	Phenoxybenzamine	GSE5258	MCF7 Cell Line
Colorectal cancer cells (LS174T) with uniduced shRNA targeting MIZ1 - 20uM BI8622 16hr _vs_ DMSO	14.8239	Chemical	BI8622	GSE59223	LS174T Cell Line
Diffuse large B cell lymphoma SU-DHL-6 cells treated with 12 hr 10uM 79-6.1085 _vs_ DMSO	14.8239	Chemical	79-6.1085	GSE73109	SU-DHL-6 Cell Line
PC3 cells + prenylamine, 9.6uM _vs_ DMSO vehicle	14.7447	Chemical	Prenylamine	GSE5258	PC-3 Cell Line [prostate cancer]
Breast cancer T47D cells sensitive to indole-3-carbinol + 200uM I3C 24hr _vs_ control (DMSO)	14.585	Chemical	indole-3-carbinol	GSE55897	T-47D Cell Line
HCT116 colon cancer cells + NO 24hr _vs_ untreated control	14.585	Chemical	Nitric Oxide	GSE3176	HCT 116 Cell Line
Prostate cancer LNCaP cells + 24hr 0.5uM siomycin A _vs_ DMSO controls	14.5528	Chemical	siomycin A	GSE36531	LNCaP Cell Line
Skin BJ fibroblasts with 5ug/mL actinomycin D 3hr - 1uM sodium arsenite 24hr pre-treated _vs_ water	14.5086	Chemical	sodium arsenite	GSE57051	BJ Cell Line [foreskin]
Hepatocellular carcinoma HepG2 cells + 90uM ethinyl estradiol for 24hr _vs_ vehicle (DMSO)	14.4437	Chemical	Ethinyl Estradiol	GSE51952	Hep G2 Cell Line
Liver cell line - Cys for 42hr _vs_ + Cys	14.4202	Chemical	Cysteine	GSE9517	C3A Cell Line
PC3 cells + disulfiram, 13.4uM _vs_ DMSO vehicle	14.3872	Chemical	Disulfiram	GSE5258	PC-3 Cell Line [prostate cancer]
HUVEC cells treated with fenofibrate for 8hr _vs_ untreated	14.3372	Chemical	Fenofibrate	GSE15494	HUVECs
Breast adenocarcinoma MCF-7 cells 6hr treated with 30nM AgNPs _vs_ untreated controls	14.3188	Chemical	Silver Nanoparticles	GSE84982	MCF7 Cell Line
HUVEC cells treated with fenofibrate for 6hr _vs_ untreated	14.301	Chemical	Fenofibrate	GSE15494	HUVECs
Ovarian cancer cell line MCAS 1uM NVP-BEZ235 treated 6hr _vs_ DMSO control	14.2076	Chemical	NVP BEZ235	GSE28992	MCAS Cell Line
Bronchial epithelial cells 2hr post-15min cigarette smoke exposure _vs_ air exposure	14.2007	Chemical	Tobacco smoke	GSE10718	Primary cells
Breast adenocarcinoma MCF-7 cells 6hr treated with 1.5ug/ml AgNO3 _vs_ untreated controls	14.1871	Chemical	Silver Nitrate	GSE84982	MCF7 Cell Line
Lymphoblastoid cells cultured 8 hr with 4ug/ml tunicamycin _vs_ DMSO control	14.1308	Chemical	Tunicamycin	GSE36911	Immortalized Cell Line
Breast cancer MDA-MB-231 cells - 10uM YW3-56 treated 8hr _vs_ DMSO	14.1079	Chemical	YW3-56	GSE46590	MDA-MB-231 Cell Line
T cell Jurkat A3 cells treated 24hr with 100ug/mL methoxyl ZnO particles _vs_ 24hr untreated	14.0809	Chemical	Zinc Oxide Nanoparticles	GSE39444	A3 Cell Line
PC3 cells + methylbenzethonium chloride, 8.6uM _vs_ DMSO vehicle	14.0555	Chemical	methylbenzethonium	GSE5258	PC-3 Cell Line [prostate cancer]
Breast adenocarcinoma MCF-7 cells 24hr treated with 20nM AgNPs _vs_ untreated controls	14.041	Chemical	Silver Nanoparticles	GSE84982	MCF7 Cell Line
Colorectal cancer cells (LS174T) with dox induced shRNA targeting MIZ1 - 20uM BI8622 16hr _vs_ DMSO	14	Chemical	BI8622	GSE59223	LS174T Cell Line
Embryonic stem WA09 cells treated 48hr with 10mM salinomycin + 60mM KCl _vs_ KCl only	13.9208	Chemical	salinomycin	GSE90826	H9 Stem Cell Line
Colon adenocarcinoma Caco-2 (TC7 clone) cell line - treated 24hr with 10uM HTy-Et _vs_ not treated	13.8861	Chemical	HTy-Et	GSE38833	Caco-2 Cell Line
MCF7 cells + withaferin A, 1uM _vs_ DMSO vehicle	13.7696	Chemical	withaferin A	GSE5258	MCF7 Cell Line
JEKO-1 cells treated with bortezomib for 10hr _vs_ 0hr	13.6778	Chemical	bortezomib	GSE14003	JeKo-1 Cell Line
Breast cancer MCF7 cells + 30uM ZNA for 12hr _vs_ control (DMSO)	13.6576	Chemical	ZNA	GSE59251	MCF7 Cell Line
Breast adenocarcinoma MCF-7 cells + 10uM thiostrepton for 6h _vs_ vehicle (DMSO)	13.6383	Chemical	Thiostrepton	GSE40766	MCF7 Cell Line
Cervical carcinoma HeLa cells treated 6hr with casiopeina-II-glycine _vs_ untreated controls	13.6383	Chemical	casiopeina II-glycine	GSE41827	HeLa Cell Line
Embryonic kidney T-REx-293 cells 6hr with 10uM ER proteostasis regulator compound 132 _vs_ DMSO	13.585	Chemical	compound 132	GSE84636	293 Cell Line
PC3 cells + thioridazine, 9.8uM _vs_ DMSO vehicle	13.4089	Chemical	Thioridazine	GSE5258	PC-3 Cell Line [prostate cancer]
NHBE cells 8hr post-exposure to 15min of reference cigarette smoke _vs_ mock exposure	13.3372	Chemical	Tobacco smoke	GSE10700	Primary cells
Prostate epithelial PrEC cells, normal + 15uM sulforaphane for 6hr _vs_ vehicle (DMSO)	13.3188	Chemical	sulforafan	GSE48812	Cell line
MT-4 cells + 5nM bortezomib _vs_ vehicle	13.284	Chemical	bortezomib	GSE6034	Cell line
MCF7 cells + disulfiram, 13.4uM _vs_ DMSO vehicle	13.2076	Chemical	Disulfiram	GSE5258	MCF7 Cell Line
MCF7 cells + oxyphenbutazone, 12.4uM _vs_ DMSO vehicle	13.2076	Chemical	Oxyphenbutazone	GSE5258	MCF7 Cell Line
Foreskin fibroblasts treated for 4hr - 35uM GSK343 _vs_ DMSO controls	13.1739	Chemical	GSK343	GSE99840	Cell line
Macrophages from monocytes treated 4hr with 20uM LA1 _vs_ DMSO controls	13.1427	Chemical	Thiazoles	GSE76802	Primary cells - cultured
SKGT4 adenocarcinoma cell line treated for 12hr with 300uM deoxycholic acid _vs_ untreated	13.1427	Chemical	Deoxycholic Acid	GSE13400	SK-GT-4 Cell Line
PC3 cells + clioquinol, 13uM _vs_ DMSO vehicle	13.1367	Chemical	Clioquinol	GSE5258	PC-3 Cell Line [prostate cancer]
293T embryonic kidney epithelial cells treated with 10uM Eeyarestatin 10hr _vs_ untreated	13.1249	Chemical	1-(4-chlorophenyl)-3-(3-(4-chlorophenyl)-5,5-dimethyl-1-(3-(5-nitrofuran-2-yl)allyldienehydrazinocarbonylmethyl)-2-oxoimidazolidin-4-yl)-1-hydroxyurea	GSE23849	293T Cell Line
Macrophages derived from monocytes treated 24hr with 10ug/mL ZnO particles _vs_ 24hr untreated	13.1024	Chemical	Zinc Oxide Nanoparticles	GSE39444	Primary cells - cultured
MCF7 cells + astemizole, 8.8uM _vs_ DMSO vehicle	13.0969	Chemical	Astemizole	GSE5258	MCF7 Cell Line
DBTRG glioblastoma cells treated for 24hr with 10uM Y15 _vs_ untreated	13	Chemical	Y15	GSE43452	Primary cells - cultured
Hepatocellular carcinoma HepG2 cells + 4hr 200uM tert-butylhydroperoxide _vs_ 4hr controls	12.9586	Chemical	tert-Butyl hydroperoxide (70% Solution in Water)	GSE39291	Hep G2 Cell Line
MCF7 cells + terfenadine, 8.4uM _vs_ DMSO vehicle	12.9586	Chemical	Terfenadine	GSE5258	MCF7 Cell Line
Myeloid leukemia cell line K562 + 50uM ICL670 16hr _vs_ untreated	12.9208	Chemical	deferasirox	GSE11670	K-562 Cell Line
GC-diffuse large B cell lymphoma Farage cells treated 12hr with 50uM FX1 _vs_ DMSO	12.8239	Chemical	FX1	GSE79888	Farage Cell Line
Hepatic stellate cells 30ug/ml HP1 ZnO nanoparticle treated 24hr _vs_ untreated	12.8239	Chemical	Zinc Oxide Nanoparticles	GSE60159	Primary cells - cultured
Heart aortic endothelial cell lines treated 4hr with 40ug_ml oxidized-PAPC _vs_ PAPC	12.6778	Chemical	oxidized-L-alpha-1-palmitoyl-2-arachidonoyl-sn-glycero-3-phosphorylcholine	GSE29903	Cell line
MCF7 cells + suloctidil, 11.8uM _vs_ DMSO vehicle	12.6778	Chemical	Suloctidil	GSE5258	MCF7 Cell Line
Prostate carcinoma PC-3 cells treated 24hr with 1mM geraniol _vs_ 0.1% ethanol vehicle controls	12.6778	Chemical	geraniol	GSE45567	PC-3 Cell Line [prostate cancer]
Breast cancer MCF7 cells + 12hr 10uM Japonicone A _vs_ DMSO	12.6021	Chemical	Japonicone A	GSE85871	MCF7 Cell Line
Prostate cancer PC3 cells + 24hr 0.5uM siomycin A _vs_ DMSO controls	12.585	Chemical	siomycin A	GSE36531	PC-3 Cell Line [prostate cancer]
Lung fibroblasts DTT 16hr _vs_ DTT 0hr	12.5376	Chemical	Dithiothreitol	GSE4301	Primary cells
Diffuse large B cell lymphoma SU-DHL-4 cells treated with 12 hr 10uM 79-6.1085 _vs_ DMSO	12.5229	Chemical	79-6.1085	GSE73109	SU-DHL-4 Cell Line
GC-diffuse large B cell lymphoma SU-DHL-4 cells treated 12hr with 50uM FX1 _vs_ DMSO	12.5229	Chemical	FX1	GSE79888	SU-DHL-4 Cell Line
MCF7 cells + benzethonium chloride, 9uM _vs_ DMSO vehicle	12.5086	Chemical	Benzethonium	GSE5258	MCF7 Cell Line
Prostate cancer LNCaP cells cultured 48hr - 30uM MK591 treated for 8hr _vs_ untreated	12.5086	Chemical	MK 0591	GSE64574	LNCaP Cell Line
Breast adenocarcinoma MDA-MB-231 cells treated with 35uM anacardic acid _vs_ vehicle	12.4685	Chemical	anacardic acid	GSE78011	MDA-MB-231 Cell Line
Breast cancer MCF7 cells (ER+) + 10uM GW3965 (LXR agonist) for 48hr _vs_ control (ethanol)	12.4559	Chemical	GW 3965	GSE34987	MCF7 Cell Line
Aortic endothelial cells treated 4hr with 40ug/mL Ox-PAPC _vs_ untreated	12.4202	Chemical	oxidized-L-alpha-1-palmitoyl-2-arachidonoyl-sn-glycero-3-phosphorylcholine	GSE30169	Primary cells - cultured
Alveolar macrophages + PM2.5 particles for 4hr _vs_ vehicle	12.3565	Chemical	Particulate Matter	GSE10394	Primary cells
PC3 cells + tonzonium bromide, 6.8uM _vs_ DMSO vehicle	12.3279	Chemical	tonzonium bromide	GSE5258	PC-3 Cell Line [prostate cancer]
Colon adenocarcinoma Caco-2 (TC7 clone) cell line - treated 24hr with 10uM HTy _vs_ not treated	12.3098	Chemical	hydroxytyrosol	GSE38833	Caco-2 Cell Line
MDA-MB-453 breast cancer cell line + 40 ug/ml actein for 24hr _vs_ DMSO control	12.3098	Chemical	actein	GSE7848	MDA-MB-453 Cell Line
Colon carcinoma cell line HCT116 0.3uM thapsigargin _vs_ untreated controls	12.2366	Chemical	Thapsigargin	GSE41666	HCT 116 Cell Line
MCF7 cells + tonzonium bromide, 6.8uM _vs_ DMSO vehicle	12.2076	Chemical	tonzonium bromide	GSE5258	MCF7 Cell Line
Neuroblastoma CHP-100 cells treated 6hr with 500nM EWS-P _vs_ DMSO controls	12.2076	Chemical	Piperidones	GSE80640	CHP-100 Cell Line
NB4 leukemic cells treated with 25uM AraC 16hr + 10nM RA 4hr _vs_ control	12.2007	Chemical	Retinoic acid	GSE29213	NB-4 Cell Line
Hepatocellular carcinoma cell line HepG2 0.3uM thapsigargin _vs_ untreated controls	12.1739	Chemical	Thapsigargin	GSE41666	Hep G2 Cell Line
MCF7 cells + clioquinol, 13uM _vs_ DMSO vehicle	12.1612	Chemical	Clioquinol	GSE5258	MCF7 Cell Line
Prostate adenocarcinoma C4-2 cells 24hr with 10uM BMS-303141 + 20uM enzalutamide _vs_ vehicle	12.1079	Chemical	MDV 3100	GSE81796	C4-2 Cell Line
PC3 cells + 15-delta prostaglandin J2, 10uM _vs_ DMSO vehicle	12.0862	Chemical	15-deoxy-delta(12,14)-prostaglandin J2	GSE5258	PC-3 Cell Line [prostate cancer]
Diffuse large B cell lymphoma Farage cells treated with 12 hr 10uM 79-6.1085 _vs_ DMSO	12.0809	Chemical	79-6.1085	GSE73109	Farage Cell Line
Aortic epithelial cells treated 4hr with 40ug per mL Ox-PAPC _vs_ untreated	12.0605	Chemical	oxidized-L-alpha-1-palmitoyl-2-arachidonoyl-sn-glycero-3-phosphorylcholine	GSE20060	Primary cells - cultured
HL60 cells + alexidine, 6.8uM _vs_ DMSO vehicle	12.0506	Chemical	alexidine	GSE5258	HL-60 Cell Line
PC3 cells + suloctidil, 11.8uM _vs_ DMSO vehicle	12.0315	Chemical	Suloctidil	GSE5258	PC-3 Cell Line [prostate cancer]
Lymphoblastoid B cells treated 2hr with 5uM sodium arsenite _vs_ untreated controls	12.0269	Chemical	sodium arsenite	GSE51454	Cell line
PC3 cells + niclosamide, 12.2uM _vs_ DMSO vehicle	12.0132	Chemical	Niclosamide	GSE5258	PC-3 Cell Line [prostate cancer]
HCT116 TP53 KO colon cancer cells + H2O2 4hr _vs_ untreated KO	12.0088	Chemical	Hydrogen peroxide	GSE3176	HCT 116 Cell Line
Colorectal cancer cells (LS174T) with empty vector - 20uM BI8622 16hr treated _vs_ DMSO	12	Chemical	BI8622	GSE59223	LS174T Cell Line
HCC Hep G2 cells treated for 24hr - 400uM nimesulide _vs_ DMSO controls	12	Chemical	nimesulide	GSE10200	Hep G2 Cell Line
Pancreatic carcinoma AsPC-1 cells treated 6hr with 10uM ICG-001 _vs_ 6hr DMSO controls	11.9586	Chemical	ICG 001	GSE57728	AsPC-1 Cell Line
PC3 cells + desipramine, 13.2uM _vs_ DMSO vehicle	11.9586	Chemical	Desipramine	GSE5258	PC-3 Cell Line [prostate cancer]
Acute promyelocytic leukemia HL60 cells 10uM Iressa-treated 6hr _vs_ 6hr DMSO_GPL96	11.9208	Chemical	Iressa	GSE68954	HL-60 Cell Line
Hepatocyte-like cells derived from ESCs + 72hr 330uM IC10 methapyrilene hydrochloride _vs_ 0.5% DMSO	11.9208	Chemical	Methapyrilene	GSE40117	Primary cells - cultured
Kit225 human leukemia cells treated with 12hr of 25mM NC1153 _vs_ control vehicle	11.9208	Chemical	NC 1153	GSE17007	Cell line
HCT116 TP53 KO colon cancer cells + NO 24hr _vs_ untreated KO	11.8861	Chemical	Nitric Oxide	GSE3176	HCT 116 Cell Line
Olfactory neurosphere cells - 25ug/ml coated HP1 ZnO nanoparticle treated 2hr _vs_ untreated	11.8861	Chemical	Zinc Oxide Nanoparticles	GSE45322	Primary cells - cultured
Prostate cancer androgen-dependent LnCaP cells + 15uM sulforaphane for 6hr _vs_ vehicle (DMSO)	11.8861	Chemical	sulforafan	GSE48812	LNCaP Cell Line
CD34+ mononuclear cells from CML patients treated 48hr in culture 4uM fenretinide _vs_ untreated	11.8539	Chemical	Fenretinide	GSE17480	Blood fraction
HCT116 TP53 KO colon cancer cells + hydroxyurea 24hr _vs_ untreated KO	11.8239	Chemical	Hydroxyurea	GSE3176	HCT 116 Cell Line
Neuroblastoma CHP-100 cells treated 6hr with 25nM EWS-W _vs_ DMSO controls	11.8239	Chemical	Piperidones	GSE80640	CHP-100 Cell Line
Olfactory neurosphere cells - 25ug/ml coated HP1 ZnO nanoparticle treated 6hr _vs_ untreated	11.8239	Chemical	Zinc Oxide Nanoparticles	GSE45322	Primary cells - cultured
Prostate cancer LnCaP cells - 100uM ST045849 (OGT inhibitor) for 24hr _vs_ vehicle	11.8239	Chemical	ST045849	GSE44624	LNCaP Cell Line
Breast adenocarcinom MDA-MB-231 cells treated with 10uM compound A for 4hr _vs_ vehicle	11.7696	Chemical	2-(4-acetoxyphenyl)-2-chloro-N-methyl-ethylammonium chloride	GSE56022	MDA-A1 Cell Line
MCF7 cells + perhexiline, 10.2uM _vs_ DMSO vehicle	11.7696	Chemical	Perhexiline	GSE5258	MCF7 Cell Line
T cell Jurkat A3 cells treated 24hr with 10ug/mL diethylene glycol ZnO particles _vs_ 24hr untreated	11.7696	Chemical	Zinc Oxide Nanoparticles	GSE39444	A3 Cell Line
Olfactory neurosphere cells - 25ug/ml uncoated Z-COTE ZnO nanoparticle treated 2hr _vs_ untreated	11.7447	Chemical	Zinc Oxide Nanoparticles	GSE45322	Primary cells - cultured
Hepatocytes of female donors treated 24hr with 35uM danazol _vs_ 0uM	11.6778	Chemical	Danazol	TG-GATES	Primary cells - cultured
Huh7 cells + 5uM NIM811 cultured for 24hr _vs_ untreated	11.6778	Chemical	(melle-4)cyclosporin	GSE15935	HuH-7 Cell Line
Macrophages treated 2d with 1ng/mL LPS _vs_ mock	11.6778	Chemical	LPS	GSE84188	Primary cells - cultured
Hepatocellular carcinoma HepG2 cells + cholestasis causing compounds for 24hr _vs_ vehicle (DMSO)	11.6576	Chemical	cholestasis causing compounds	GSE51952	Hep G2 Cell Line
SKGT4 adenocarcinoma cell line treated for 4hr 300uM deoxycholic acid _vs_ untreated	11.6383	Chemical	Deoxycholic Acid	GSE13400	SK-GT-4 Cell Line
PC3 cells + trimipramine, 9.8uM _vs_ DMSO vehicle	11.6198	Chemical	Trimipramine	GSE5258	PC-3 Cell Line [prostate cancer]
A549 lung cancer cells + PCI-5002 _vs_ vehicle	11.6021	Chemical	sapphyrin	GSE6972	A549 Cell Line
Intraductal breast carcinoma HCC1937 cells BRCA1-rescued 24hr 10uM COH29-treated _vs_ untreated	11.6021	Chemical	COH29	GSE55004	HCC1937 Cell Line
Hs 294T melanoma cells treated 6hr with 100nM elesclomol _ vs_ vehicle control	11.5686	Chemical	elesclomol	GSE11552	Hs 294T Cell Line
PC3 cells + clotrimazole, 11.6uM _vs_ DMSO vehicle	11.5528	Chemical	Clotrimazole	GSE5258	PC-3 Cell Line [prostate cancer]
Glioblastoma U87 cells + IC50 concentration of ruthenium-based compound, RDC for 6hr _vs_ untreated	11.5376	Chemical	Ruthenium Compounds	GSE66493	U-87 MG Cell Line
MCF7 cells + celastrol, 2.5uM _vs_ DMSO vehicle	11.5376	Chemical	celastrol	GSE5258	MCF7 Cell Line
SKGT4 adenocarcinoma cell line treated for 8hr with 300uM deoxycholic acid _vs_ untreated	11.5376	Chemical	Deoxycholic Acid	GSE13400	SK-GT-4 Cell Line
MCF7 cells + hexetidine, 11.8uM _vs_ DMSO vehicle	11.5229	Chemical	Hexetidine	GSE5258	MCF7 Cell Line
MCF7 cells + tamoxifen, 7uM _vs_ DMSO vehicle	11.4685	Chemical	Tamoxifen	GSE5258	MCF7 Cell Line
Hepatocellular carcinoma HepG2 cells + 2hr 200uM tert-butylhydroperoxide _vs_ 2hr controls	11.4437	Chemical	tert-Butyl hydroperoxide (70% Solution in Water)	GSE39291	Hep G2 Cell Line
Pancreatic duct cancer PANC-1 cells - 0.1uM TVB-3166 for 72hr _vs_ DMSO	11.4437	Chemical	TVB-3166	GSE64337	PANC-1 Cell Line
LCLs from family A breast cancer patients treated 4hr with 10mM caffeine _vs_ untreated controls	11.3979	Chemical	Caffeine	GSE37210	Cell line
Olfactory neurosphere cells - 25ug/ml uncoated Nanosun ZnO nanoparticle treated 2hr _vs_ untreated	11.3979	Chemical	Zinc Oxide Nanoparticles	GSE45322	Primary cells - cultured
MCF7 cells + nifuroxazide, 14.6uM _vs_ DMSO vehicle	11.3872	Chemical	nifuroxazide	GSE5258	MCF7 Cell Line
PC3 cells + monensin, 5.8uM _vs_ DMSO vehicle	11.3872	Chemical	Monensin	GSE5258	PC-3 Cell Line [prostate cancer]
Breast cancer MCF10A cells in culture - 50mM 2-deoxy-glucose 24hr _vs_ water	11.3565	Chemical	2-deoxy-glucose tetraacetate	GSE59232	MCF 10A Cell Line
Pancreatic duct cancer PANC-1 cells - 1uM TVB-3166 for 72hr _vs_ DMSO	11.3468	Chemical	TVB-3166	GSE64337	PANC-1 Cell Line
Bronchial epithelial cells 24hr post-15min cigarette smoke exposure _vs_ air exposure	11.3188	Chemical	Tobacco smoke	GSE10718	Primary cells
HCT116 TP53 KO colon cancer cells + NO 8hr _vs_ untreated KO	11.2924	Chemical	Nitric Oxide	GSE3176	HCT 116 Cell Line
HT-1080 cells glucose starved 18hr _vs_ untreated control	11.2924	Chemical	Glucose	GSE13548	HT 1080 Cell Line
Breast adenocarcinoma MCF7 cells treated for 12hr - 25uM delta-2-troglitazone _vs_ DMSO controls	11.2596	Chemical	troglitazone	GSE99941	MCF7 Cell Line
PC3 cells + chlorpromazine, 11.2uM _vs_ DMSO vehicle	11.2596	Chemical	Chlorpromazine	GSE5258	PC-3 Cell Line [prostate cancer]
Hepatic stellate cells 30ug/ml MAX ZnO nanoparticle treated 24hr _vs_ untreated	11.2518	Chemical	Zinc Oxide Nanoparticles	GSE60159	Primary cells - cultured
Breast cancer MDA-MB-231 cells in culture - 50mM 2-deoxy-glucose 24hr _vs_ water	11.2366	Chemical	2-deoxy-glucose tetraacetate	GSE59232	MDA-MB-231 Cell Line
Lung fibroblasts DTT 24hr _vs_ DTT 0hr	11.2366	Chemical	Dithiothreitol	GSE4301	Primary cells
Hepatocytes of female donors treated 24hr with 600uM omeprazole _vs_ 0uM	11.2218	Chemical	Omeprazole	TG-GATES	Primary cells - cultured
LCLs from family B breast cancer patients treated 4hr with 10mM caffeine _vs_ untreated controls	11.2147	Chemical	Caffeine	GSE37210	Cell line
MCF7 cells + mefloquine, 9.6uM _vs_ DMSO vehicle	11.2007	Chemical	Mefloquine	GSE5258	MCF7 Cell Line
Hepatocytes of female donors treated 8hr with 125uM nitrofurantoin _vs_ 0uM	11.1487	Chemical	Nitrofurantoin	TG-GATES	Primary cells - cultured
HL60 cells + ciclopirox, 15uM _vs_ DMSO vehicle	11.1249	Chemical	ciclopirox	GSE5258	HL-60 Cell Line
HepG2 hepatocellular carcinoma cell line 2mM Lindane treated for 24hr _vs_ DMSO control	11.0605	Chemical	Lindane	GSE28878	Hep G2 Cell Line
PC3 cells + securinine, 18.4uM _vs_ DMSO vehicle	11.0223	Chemical	securinine	GSE5258	PC-3 Cell Line [prostate cancer]
293T embryonic kidney epithelial cells treated with 10uM 5-nitrofuryl-acrolein 10hr _vs_ untreated	11.0177	Chemical	5-nitrofuryl-2-acrolein	GSE23849	293T Cell Line
MCF7 cells + prenylamine, 9.6uM _vs_ DMSO vehicle	11	Chemical	Prenylamine	GSE5258	MCF7 Cell Line
Pancreatic ductal cancer PANC-1 cells 48hr with 200uM CoCl2 _vs_ vehicle controls	11	Chemical	cobaltous chloride	GSE82104	PANC-1 Cell Line
Abl androgen independent prostate cancer cell line + 100nM dihydrotestosterone 16hr _vs_ vehicle	10.9586	Chemical	Dihydrotestosterone	GSE11428	Cell line
Aortic endothelial cells with M-199 - 4hr with 40ug/mL Ox-PAPC _vs_ untreated	10.9586	Chemical	oxidized-L-alpha-1-palmitoyl-2-arachidonoyl-sn-glycero-3-phosphorylcholine	GSE89970	Primary cells - cultured
Breast adenocarcinoma MCF7 cells treated 72hr with 700nM withaferin A _vs_ DMSO	10.9586	Chemical	withaferin A	GSE53049	MCF7 Cell Line
MCF7 cells + maprotiline, 12.8uM _vs_ DMSO vehicle	10.9586	Chemical	Maprotiline	GSE5258	MCF7 Cell Line
Breast adenocarcinoma MCF-7 cells 24hr treated with 30nM AgNPs _vs_ untreated controls	10.9208	Chemical	Silver Nanoparticles	GSE84982	MCF7 Cell Line
Chondrocytes 24hr with curcuminoids + collagen + green tea extract _vs_ untreated	10.9208	Chemical	green tea extract	GSE75181	Primary cells - cultured
PC3 cells + gossypol, 7.8uM _vs_ DMSO vehicle	10.9208	Chemical	Gossypol	GSE5258	PC-3 Cell Line [prostate cancer]
Olfactory neurosphere cells - 25ug/ml uncoated Z-COTE ZnO nanoparticle treated 6hr _vs_ untreated	10.8861	Chemical	Zinc Oxide Nanoparticles	GSE45322	Primary cells - cultured
Dendritic cells derived from GM-CSF IL4 exposed blood monocytes - LPS matured _vs_ untreated	10.7959	Chemical	LPS	GSE79706	Primary cells - cultured
HCC Hep G2 cells treated for 24hr - 25uM nefazodone _vs_ DMSO controls	10.7959	Chemical	nefazodone	GSE10200	Hep G2 Cell Line
HCT116 colon cancer cells + H2O2 4hr _vs_ untreated control	10.7959	Chemical	Hydrogen peroxide	GSE3176	HCT 116 Cell Line
Dermal fibroblasts of normal humans + 50ug/mL rottlerin for 24hr _vs_ PBS	10.7696	Chemical	rottlerin	GSE23741	Primary cells - cultured
Hepatocellular carcinoma HepG2 cells + 6hr 200uM tert-butylhydroperoxide _vs_ 6hr controls	10.7696	Chemical	tert-Butyl hydroperoxide (70% Solution in Water)	GSE39291	Hep G2 Cell Line
MCF7 cells + clomifene, 6.6uM _vs_ DMSO vehicle	10.7696	Chemical	Clomiphene	GSE5258	MCF7 Cell Line
Chronic myelogenous leukemia K562 cells - 5uM IST5-002 treated 48hr _vs_ DMSO	10.7212	Chemical	IST5-002	GSE61312	K-562 Cell Line
PC3 cells + thioridazine, 10uM _vs_ DMSO vehicle	10.699	Chemical	Thioridazine	GSE5258	PC-3 Cell Line [prostate cancer]
MCF7 cells + ebselen, 14.6uM _vs_ DMSO vehicle	10.6576	Chemical	ebselen	GSE5258	MCF7 Cell Line
Medullary thyroid cancer TT cell line - 10uM FAK inhibitor Y15 treated _vs_ untreated	10.6383	Chemical	Y15	GSE55619	Cell line
MCF7 breast cancer cells treated 6hr traditional Chinese medicine Si-Wu-Tang 2560 ug/mL _vs_ vehicle	10.6198	Chemical	si-wu-tang	GSE23610	MCF7 Cell Line
MCF7 cells + 5182598, 25uM _vs_ DMSO vehicle	10.6198	Chemical	5182598	GSE5258	MCF7 Cell Line
PC3 cells + trifluoperazine, 10uM _vs_ DMSO vehicle	10.585	Chemical	Trifluoperazine	GSE5258	PC-3 Cell Line [prostate cancer]
Hepatocyte-like cells derived from ESCs + 72hr 7360uM IC10 NNK _vs_ 0.5% DMSO	10.5528	Chemical	4-(acetoxymethylnitrosamino)-1-(3-pyridyl)-1-butanone	GSE40117	Primary cells - cultured
Hepatocellular carcinoma HepG2 cells + cholestasis causing compounds for 24hr _vs_ non-hepatotoxic	10.5376	Chemical	cholestasis causing compounds	GSE51952	Hep G2 Cell Line
Lung airway epithelial cell line F508del-CFTR mutation - 15uM DMNQ treated for 24hr _vs_ untreated	10.5376	Chemical	2,3-dimethoxy-1,4-naphthoquinone	GSE39843	Cell line
Breast adenocarcinoma MCF-7 cells 24hr treated with 60nM AgNPs _vs_ untreated controls	10.5229	Chemical	Silver Nanoparticles	GSE84982	MCF7 Cell Line
Pancreatic carcinoma BxPC-3 cells treated 72hr with 10uM GW3965 _vs_ ethanol vehicle	10.5229	Chemical	GW 3965	GSE51656	BxPC-3 Cell Line
Olfactory neurosphere cells - 25ug/ml uncoated Nanosun ZnO nanoparticle treated 6hr _vs_ untreated	10.4949	Chemical	Zinc Oxide Nanoparticles	GSE45322	Primary cells - cultured
Prostate cancer C4-2B cells in culture 24hr - 5uM XY011 for 48hr _vs_ vehicle control	10.4949	Chemical	XY011	GSE72483	C4-2B Cell Line
Lung fibroblasts menadione 6hr _vs_ menadione 0hr	10.4815	Chemical	menadione	GSE4301	Lung fibroblasts
MCF7 cells + calmidazolium, 5uM _vs_ DMSO vehicle	10.4437	Chemical	calmidazolium	GSE5258	MCF7 Cell Line
MCF7 cells + fendiline, 11.4uM _vs_ DMSO vehicle	10.3979	Chemical	Fendiline	GSE5258	MCF7 Cell Line
Foreskin fibroblasts treated for 4hr - 30uM GSK126 _vs_ DMSO controls	10.3768	Chemical	GSK-126	GSE99840	Cell line
MCF7 cells + metixene, 11.6uM _vs_ DMSO vehicle	10.3468	Chemical	methixene	GSE5258	MCF7 Cell Line
Embryonic stem WA09 cells treated 48hr with 10mM salinomycin + 60mM NaCl _vs_ NaCl only	10.3372	Chemical	salinomycin	GSE90826	H9 Stem Cell Line
Burkitt lymphoma BL-2 cells 3hr - 60uM 10058-F4 _vs_ DMSO	10.3279	Chemical	10058-F4 compound	GSE71725	BL-2 Cell Line
293T embryonic kidney epithelial cells treated with 10uM CBU-028 10hr _vs_ untreated	10.3188	Chemical	CBU-028	GSE23849	293T Cell Line
Neuroblastoma IMR32 cells - 118uM teriflunomide treated 24hr _vs_ DMSO	10.3188	Chemical	teriflunomide	GSE67338	IMR-32 Cell Line
HT29 colon adenocarcinoma cells treated with cyclooxygenase-2 inhibitor NS398 _vs_ DMSO control	10.3098	Chemical	N-(2-cyclohexyloxy-4-nitrophenyl)methanesulfonamide	GSE15799	HT 29 Cell Line
MCF7 cells + pimozide, 8.6uM _vs_ DMSO vehicle	10.3098	Chemical	Pimozide	GSE5258	MCF7 Cell Line
PC3 cells + pyrvinium, 3.4uM _vs_ DMSO vehicle	10.3098	Chemical	pyrvinium	GSE5258	PC-3 Cell Line [prostate cancer]
Prostate cancer LNCaP cells + 48hr 0.5uM siomycin A _vs_ DMSO controls	10.2924	Chemical	siomycin A	GSE36531	LNCaP Cell Line
Hepatocellular carcinoma hepatocyte HepG2 cells + 6hr 100uM ketoconazole _vs_ DMSO	10.284	Chemical	ketoconazole	GSE69851	Hep G2 Cell Line
Hepatocytes of female donors treated 24hr with 200uM naphthyl isothiocyanate _vs_ 0uM	10.284	Chemical	1-Naphthylisothiocyanate	TG-GATES	Primary cells - cultured
Hepatocellular carcinoma HepG2 cells + 20uM cyclosporin A for 24hr _vs_ vehicle (DMSO)	10.2757	Chemical	Cyclosporine	GSE51952	Hep G2 Cell Line
Prostate cancer VCaP cells selective deubiquitinase inhibitor WP1130 treated 24hr _vs_ DMSO	10.2676	Chemical	degrasyn	GSE53994	VCaP Cell Line
PC3 cells + vanoxerine, 7.6uM _vs_ DMSO vehicle	10.2441	Chemical	vanoxerine	GSE5258	PC-3 Cell Line [prostate cancer]
Primary hepatocytes + 400uM grepafloxacin for 24hr _vs_ control	10.2441	Chemical	grepafloxacin	GSE9166	Primary cells
PC3 cells + spiperone, 10.2uM _vs_ DMSO vehicle	10.2291	Chemical	Spiperone	GSE5258	PC-3 Cell Line [prostate cancer]
TK6 spherocytic spleen cells 4mM ethyl methanesulfonate treated 24hr _vs_ untreated	10.2218	Chemical	Ethyl Methanesulfonate	GSE41296	TK6 Cell Line
Umbilical vein endothelial HUVEC cells + 100uM N-octanoyl dopamine (NOD) for 24hr _vs_ untreated	10.2218	Chemical	N-octanoyl dopamine	GSE56285	HUVECs
Hepatocytes of female donors treated 8hr with 140uM labetalol _vs_ 0uM	10.1549	Chemical	Labetalol	TG-GATES	Primary cells - cultured
HepG2 hepatocarcinoma cells serum-starved 4hr - treated 4hr with 50uM PDTC _vs_ untreated	10.1549	Chemical	pyrrolidine dithiocarbamic acid	GSE14632	Hep G2 Cell Line
MCF7 cells + niclosamide, 12.2uM _vs_ DMSO vehicle	10.1079	Chemical	Niclosamide	GSE5258	MCF7 Cell Line
MCF7 cells + methylbenzethonium chloride, 8.6uM _vs_ DMSO vehicle	10.0655	Chemical	methylbenzethonium	GSE5258	MCF7 Cell Line
MCF7 cells + alexidine, 6.8uM _vs_ DMSO vehicle	10.0555	Chemical	alexidine	GSE5258	MCF7 Cell Line
MCF7 cells + chlorhexidine, 8uM _vs_ DMSO vehicle	10.0132	Chemical	Chlorhexidine	GSE5258	MCF7 Cell Line
MCF7 cells + loperamide, 7.8uM _vs_ DMSO vehicle	10.0044	Chemical	Loperamide	GSE5258	MCF7 Cell Line
Hepatocellular carcinoma Hep G2 cells treated 12hr - 2uM benzo(a)pyrene _vs_ DMSO control	10	Chemical	Benzo(a)pyrene	GSE36242	Hep G2 Cell Line
Acute monocyte leukemia cell line THP1 - stimulated with Infliximab for 6hr _vs_ untreated	9.95861	Chemical	infliximab	GSE33585	THP-1 Cell Line
HL60 myeloid leukemia cells expressing negative control shRNA - 1d post 32nM PMA _vs_ untreated	9.95861	Chemical	pma	GSE20476	HL-60 Cell Line
Prostate cancer LnCaP cells - 100uM ST045849 (OGT inhibitor) for 12hr _vs_ vehicle	9.95861	Chemical	ST045849	GSE44624	LNCaP Cell Line
HCC Hep G2 cells treated for 6hr - 25uM nefazodone _vs_ DMSO controls	9.92082	Chemical	nefazodone	GSE10200	Hep G2 Cell Line
MCF7 cells + fluspirilene, 8.4uM _vs_ DMSO vehicle	9.92082	Chemical	Fluspirilene	GSE5258	MCF7 Cell Line
MCF7 cells + ivermectin, 4.6uM _vs_ DMSO vehicle	9.92082	Chemical	Ivermectin	GSE5258	MCF7 Cell Line
Multiple myeloma cell lines treated with darinaparsin 6hr _vs_ control	9.92082	Chemical	S-(dimethylarsino)-glutathione	GSE14519	Cell line
Cultured PBMCs from light smokers + 40ug per ml Cigarette smoke condensate 18hr _vs_ untreated	9.88606	Chemical	Tobacco smoke	GSE12587	Primary cells - cultured
Hepatocytes of female donors treated 8hr with 35uM danazol _vs_ 0uM	9.88606	Chemical	Danazol	TG-GATES	Primary cells - cultured
HepG2 hepatocellular carcinoma cell line 250uM DZN treated for 24hr _vs_ DMSO control	9.88606	Chemical	Diazinon	GSE28878	Hep G2 Cell Line
MCF7 cells + pyrvinium, 3.4uM _vs_ DMSO vehicle	9.88606	Chemical	pyrvinium	GSE5258	MCF7 Cell Line
MCF7 cells + thioridazine, 9.8uM _vs_ DMSO vehicle	9.88606	Chemical	Thioridazine	GSE5258	MCF7 Cell Line
PC3 cells + sirolimus, 0.1uM _vs_ DMSO vehicle	9.88606	Chemical	Rapamycin	GSE5258	PC-3 Cell Line [prostate cancer]
Prostate adenocarcinoma LNCaP cells treated 6hr with 1nm R1881 + 20uM gedunin _vs_ ethanol + DMSO	9.88606	Chemical	R1881	GSE5508	Not annotated
Skin of patients with CI deficiency cultured without glucose + galactose _vs_ glucose control	9.88606	Chemical	galactose	GSE27041	Primary cells - cultured
MCF7 cells + piperlongumine, 12.6uM _vs_ DMSO vehicle	9.82391	Chemical	piperlonguminine	GSE5258	MCF7 Cell Line
Hepatocellular carcinoma HepG2 cells + ketoconazole 14hr _vs_ DMSO	9.79588	Chemical	Ketoconazole	GSE54254	Hep G2 Cell Line
HepG2 hepatocarcinoma cells serum-starved 4hr - treated 8hr with 50uM PDTC _vs_ untreated	9.79588	Chemical	pyrrolidine dithiocarbamic acid	GSE14632	Hep G2 Cell Line
Ishikawa cell line (ERÎ±, ERÎ² and PGR positive) 1uM BPA treated for 24hr _vs_ control 24hr	9.79588	Chemical	bisphenol A	GSE17624	Ishikawa Cell Line
MCF7 cells + 5109870, 25uM _vs_ DMSO vehicle	9.79588	Chemical	5109870	GSE5258	MCF7 Cell Line
Hep G2 hepatocellular carcinoma cell line + 100uM clinafloxacin for 24hr _vs_ control	9.76955	Chemical	clinafloxacin	GSE9166	Hep G2 Cell Line
LCLs from family C cancer-free members treated 4hr with 10mM caffeine _vs_ untreated controls	9.76955	Chemical	Caffeine	GSE37210	Cell line
PC3 cells + fluphenazine, 7.8uM _vs_ DMSO vehicle	9.76955	Chemical	Fluphenazine	GSE5258	PC-3 Cell Line [prostate cancer]
Hepatocellular carcinoma HepG2 cells + diclofenac 14hr _vs_ DMSO	9.72125	Chemical	Diclofenac	GSE54254	Hep G2 Cell Line
Hepatocytes of female donors treated 8hr with 60uM disulfiram _vs_ 0uM	9.72125	Chemical	Disulfiram	TG-GATES	Primary cells - cultured
LCLs from family B cancer-free members treated 4hr with 10mM caffeine _vs_ untreated controls	9.72125	Chemical	Caffeine	GSE37210	Cell line
PC3 cells + azacyclonol, 15uM _vs_ DMSO vehicle	9.69897	Chemical	azacyclonol	GSE5258	PC-3 Cell Line [prostate cancer]
Hepatocellular carcinoma HepG2 cells + 72hr 2.1mM IC10 tolbutamide _vs_ 0.5% DMSO	9.67778	Chemical	Tolbutamide	GSE40117	Hep G2 Cell Line
HL60 cells + perhexiline, 10.2uM _vs_ DMSO vehicle	9.67778	Chemical	Perhexiline	GSE5258	HL-60 Cell Line
PC3 cells + prochlorperazine, 10uM _vs_ DMSO vehicle	9.67778	Chemical	Prochlorperazine	GSE5258	PC-3 Cell Line [prostate cancer]
LCLs from family C breast cancer patients treated 4hr with 10mM caffeine _vs_ untreated controls	9.63827	Chemical	Caffeine	GSE37210	Cell line
Prostate cancer C4-2B cells in culture 24hr - 5uM SR2211 for 48hr _vs_ vehicle control	9.61979	Chemical	SR2211	GSE72483	C4-2B Cell Line
Lung fibroblasts menadione 36hr _vs_ menadione 0hr	9.60206	Chemical	menadione	GSE4301	Primary cells
HCC Hep G2 cells treated for 12hr - 400uM nimesulide _vs_ DMSO controls	9.58503	Chemical	nimesulide	GSE10200	Hep G2 Cell Line
Pancreatic carcinoma AsPC-1 cells treated 24hr with 10uM ICG-001 _vs_ 24hr DMSO controls	9.58503	Chemical	ICG 001	GSE57728	AsPC-1 Cell Line
Colorectal cancer HCT116 cells - 10uM TIC10 treated 48hr _vs_ vehicle control	9.56864	Chemical	TIC10	GSE34194	HCT 116 Cell Line
T cell Jurkat A3 cells treated 24hr with 10ug/mL ZnO particles _vs_ 24hr untreated	9.55284	Chemical	Zinc Oxide Nanoparticles	GSE39444	A3 Cell Line
U251 glioma cells DFO-stimulated (hypoxia-mimetic) + polyamide _vs_ unstimulated untreated control	9.55284	Chemical	Deferoxamine mesylate	GSE7835	U-251 MG Cell Line
PC3 prostate cancer cells + 3uM CCG-1423 (Rho-transcription inhibitor) 24hr _vs_ DMSO	9.5376	Chemical	CCG 1423	GSE30188	PC-3 Cell Line [prostate cancer]
PC3 prostate cancer cells + 3uM CCG-1423 (Rho-transcription inhibitor) 2hr _vs_ DMSO 24hr	9.5376	Chemical	CCG 1423	GSE30188	PC-3 Cell Line [prostate cancer]
HepG2 hepatocellular carcinoma cell line 300uM 2CMP treated for 12hr _vs_ DMSO control	9.52288	Chemical	pyridine hydrochloride	GSE28878	Hep G2 Cell Line
Acute promyelocytic leukemia HL60 cells 10uM Iressa-treated 24hr _vs_ 24hr DMSO_GPL96	9.50864	Chemical	Iressa	GSE68954	HL-60 Cell Line
Macrophages treated 1d with 1ng/mL LPS _vs_ mock	9.49485	Chemical	LPS	GSE84188	Primary cells - cultured
Jurkat T-cells 6hr post 200uM Diazinon treatment _vs_ untreated	9.48149	Chemical	Diazinon	GSE46909	Jurkat Cell Line
Ishikawa cell line (ERÎ±, ERÎ² and PGR positive) 1uM BPA treated for 48hr _vs_ control 48hr	9.45593	Chemical	bisphenol A	GSE17624	Ishikawa Cell Line
Dendritic cells from monocytes of healthy donors 12hr - 1ug/ml LPS _vs_ untreated control	9.4437	Chemical	LPS	GSE77969	Primary cells - cultured
PC3 cells + withaferin A, 1uM _vs_ DMSO vehicle	9.4437	Chemical	withaferin A	GSE5258	PC-3 Cell Line [prostate cancer]
MCF7 cells + parthenolide, 16.2uM _vs_ DMSO vehicle	9.4318	Chemical	parthenolide	GSE5258	MCF7 Cell Line
Olfactory neurosphere cells - 25ug/ml coated MAX ZnO nanoparticle treated 2hr _vs_ untreated	9.42022	Chemical	Zinc Oxide Nanoparticles	GSE45322	Primary cells - cultured
Hepatocyte-like cells derived from ESCs + 72hr 8155uM IC10 cyclophosphamide _vs_ 0.5% DMSO	9.39794	Chemical	Cyclophosphamide monohydrate	GSE40117	Primary cells - cultured
MDA-MB-453 breast cancer cell line + 20 ug/ml actein for 24hr _vs_ DMSO control	9.39794	Chemical	actein	GSE7848	MDA-MB-453 Cell Line
HL60 cells + myricetin, 12.6uM _vs_ DMSO vehicle	9.37675	Chemical	myricetin	GSE5258	HL-60 Cell Line
Leukemic CUTLL1 T-lymphocytes 2uM GSKJ4 treated 24hr _vs_ untreated	9.35655	Chemical	GSKJ4	GSE56691	CUTLL1 Cell Line
MCF7 cells + betulinic acid, 8.8uM _vs_ DMSO vehicle	9.35655	Chemical	betulinic acid	GSE5258	MCF7 Cell Line
Breast adenocarcinoma MCF7 cells + 6hr 100uM progesterone _vs_ DMSO	9.3279	Chemical	progesterone	GSE69851	MCF7 Cell Line
PC3 cells + bepridil, 10uM _vs_ DMSO vehicle	9.3279	Chemical	Bepridil	GSE5258	PC-3 Cell Line [prostate cancer]
Breast adenocarcinoma MCF7 cells treated 24hr with 5uM SR2211 _vs_ DMSO	9.31876	Chemical	SR2211	GSE74981	MCF7 Cell Line
Hepatocytes of female donors treated 8hr with 10000uM isoniazid _vs_ 0uM	9.30103	Chemical	Isoniazid	TG-GATES	Primary cells - cultured
Leukemic CUTLL1 T-lymphocytes 2uM GSKJ4 treated 72hr _vs_ untreated	9.30103	Chemical	GSKJ4	GSE56691	CUTLL1 Cell Line
Hepatocytes of female donors treated 24hr with 150uM nifedipine _vs_ 0uM	9.284	Chemical	Nifedipine	TG-GATES	Primary cells - cultured
HepG2 hepatocellular carcinoma cell line 2mM NPD treated for 24hr _vs_ DMSO control	9.284	Chemical	Phenylenediamines	GSE28878	Hep G2 Cell Line
Breast cancer MCF7 cells + 30uM ZNA for 3hr _vs_ control (DMSO)	9.26761	Chemical	ZNA	GSE59251	MCF7 Cell Line
Hepatocytes of female donors treated 24hr with 125uM nitrofurantoin _vs_ 0uM	9.26761	Chemical	Nitrofurantoin	TG-GATES	Primary cells - cultured
MCF7 cells + rottlerin, 10uM _vs_ DMSO vehicle	9.26761	Chemical	rottlerin	GSE5258	MCF7 Cell Line
Hepatocellular carcinoma HepG2 cells + 2mM tetracycline for 24hr _vs_ vehicle (DMSO)	9.25964	Chemical	Tetracycline	GSE51952	Hep G2 Cell Line
HL60 myeloid leukemia cells expressing USP2 shRNA - 3d post 32nM PMA _vs_ untreated	9.25964	Chemical	pma	GSE20476	HL-60 Cell Line
TK6 spherocytic spleen cells 4mM ethyl methanesulfonate treated 4hr _vs_ untreated	9.25181	Chemical	Ethyl Methanesulfonate	GSE41296	TK6 Cell Line
MCF10A cells expressing PIK3CA E545K mutant - LY294002 treated 24hr _vs_ untreated	9.24413	Chemical	LY 294002	GSE33403	MCF 10A Cell Line
MCF7 cells treated with ARC _vs_ untreated	9.24413	Chemical	4-amino-6-hydrazino-7-beta-D-ribofuranosyl-7H-pyrrolo(2,3-d)-pyrimidine-5-carboxamide	GSE13477	MCF7 Cell Line
Retinal pigment epithelial hTERT RPE-1 cells 24hr 0.5uM MG132 treated _vs_ untreated	9.22915	Chemical	MG132	GSE60570	hTERT RPE-1 Cell Line
MCF7 cells + azacyclonol, 15uM _vs_ DMSO vehicle	9.20761	Chemical	azacyclonol	GSE5258	MCF7 Cell Line
HCC Hep G2 cells treated for 6hr - 200uM nimesulide _vs_ DMSO controls	9.1549	Chemical	nimesulide	GSE10200	Hep G2 Cell Line
HL60 cells + disulfiram, 13.4uM _vs_ DMSO vehicle	9.14874	Chemical	Disulfiram	GSE5258	HL-60 Cell Line
Embryonic stem WA09 cells - DNA damage induced for 5hr via doxorubicin _vs_ untreated	9.14267	Chemical	Doxorubicin	GSE39762	H9 Stem Cell Line
LNCAP cells HDAC inhibitor treated _vs_ vehicle treated	9.13668	Chemical	HDAC inhibitor	GSE8645	LNCaP Cell Line
HL60 cells + gossypol, 7.8uM _vs_ DMSO vehicle	9.12494	Chemical	Gossypol	GSE5258	HL-60 Cell Line
PC3 cells + perphenazine, 10uM _vs_ DMSO vehicle	9.12494	Chemical	Perphenazine	GSE5258	PC-3 Cell Line [prostate cancer]
Histiocytic lymphoma U937 cells ZXDC1/2 shRNA induced for 4d - 100nM PMA for 3d _vs_ vehicle	9.11919	Chemical	pma	GSE45417	U-937 Cell Line
Liver carcinoma HepG2 cells - 10uM cadmium treated for 24hr _vs_ untreated	9.10237	Chemical	Cadmium	GSE31286	Hep G2 Cell Line
HL60 cells + thioridazine, 10uM _vs_ DMSO vehicle	9.09691	Chemical	Thioridazine	GSE5258	HL-60 Cell Line
Breast adenocarcinoma MCF-7 cells 6hr treated with 110nM AgNPs _vs_ untreated controls	9.08619	Chemical	Silver Nanoparticles	GSE84982	MCF7 Cell Line
Breast adenocarcinoma MDA-MB-231 cells treated 72hr with 700nM withaferin A _vs_ DMSO	9.03621	Chemical	withaferin A	GSE53049	MDA-MB-231 Cell Line
MCF7 cells + butoconazole, 8.4uM _vs_ DMSO vehicle	9.03621	Chemical	butoconazole	GSE5258	MCF7 Cell Line
HepG2 hepatocarcinoma cells serum-starved 4hr - treated 1hr with 50uM PDTC _vs_ untreated	9.03152	Chemical	pyrrolidine dithiocarbamic acid	GSE14632	Hep G2 Cell Line
HET-1A esophageal cell line treated for 12hr with 300uM deoxycholic acid _vs_ untreated	9.03152	Chemical	Deoxycholic Acid	GSE13400	Het-1A Cell Line
Mantle cell lymphoma cell lines treated with emetine followed by actinomycin D _vs_ mock treated	9.03152	Chemical	Actinomycin D	GSE6728	Cell line
HCT116 TP53 KO colon cancer cells + H2O2 24hr _vs_ untreated KO	9	Chemical	Hydrogen peroxide	GSE3176	HCT 116 Cell Line
Hepatocellular carcinoma HepG2 cells + 24hr with 100uM menadione _vs_ 24hr controls	9	Chemical	menadione	GSE39291	Hep G2 Cell Line
HepG2 hepatocarcinoma cells serum-starved 4hr - treated 2hr with 50uM PDTC _vs_ untreated	9	Chemical	pyrrolidine dithiocarbamic acid	GSE14632	Hep G2 Cell Line
HepG2 hepatocellular carcinoma cell line 250uM AZA treated for 48hr _vs_ DMSO control	9	Chemical	Azacitidine	GSE28878	Hep G2 Cell Line
HL60 cells + isoxsuprine, 11.8uM _vs_ DMSO vehicle	9	Chemical	Isoxsuprine	GSE5258	HL-60 Cell Line
MCF7 cells + MG-132, 21uM _vs_ DMSO vehicle	9	Chemical	MG132	GSE5258	MCF7 Cell Line
MCF7 cells + thiostrepton, 2.4uM _vs_ DMSO vehicle	9	Chemical	Thiostrepton	GSE5258	MCF7 Cell Line
Breast epithelial MCF-10A cells expressing NOTCH1 - 30uM ginkgolic acid treated 3d _vs_ DMSO control	8.95861	Chemical	ginkgolic acid	GSE61727	MCF 10A Cell Line
PC3 cells + ivermectin, 4.6uM _vs_ DMSO vehicle	8.95861	Chemical	Ivermectin	GSE5258	PC-3 Cell Line [prostate cancer]
HUVEC cells treated with 10ng/ml TNF-alpha and 100uM N-octanoyldopamine 24hr _vs_ TNF-alpha only	8.92082	Chemical	N-octanoyldopamine	GSE34059	HUVECs
MCF7 cells + bepridil, 10uM _vs_ DMSO vehicle	8.92082	Chemical	Bepridil	GSE5258	MCF7 Cell Line
MCF7 cells + dequalinium chloride, 7.6uM _vs_ DMSO vehicle	8.92082	Chemical	Dequalinium	GSE5258	MCF7 Cell Line
MCF7 cells + mometasone, 7.6uM _vs_ DMSO vehicle	8.92082	Chemical	mometasone furoate	GSE5258	MCF7 Cell Line
B-lymphoma U937 cells treated with NO-releasing prodrug JS-K for 4hr _vs_ vehicle	8.88606	Chemical	Nitric Oxide	GSE42344	U-937 Cell Line
Hepatic stellate cells 30ug/ml Z-COTE ZnO nanoparticle treated 24hr _vs_ untreated	8.88606	Chemical	Zinc Oxide Nanoparticles	GSE60159	Primary cells - cultured
HPBM-macrophages + 10uM simvastatin for 12hr _vs_ vehicle	8.88606	Chemical	Simvastatin	GSE4883	Blood fraction
Hepatocyte-like cells derived from ESCs + 72hr 5.5mM IC10 tolbutamide _vs_ 0.5% DMSO	8.85387	Chemical	Tolbutamide	GSE40117	Primary cells - cultured
HET-1A esophageal cell line treated for 8hr with 300uM deoxycholic acid _vs_ untreated	8.85387	Chemical	Deoxycholic Acid	GSE13400	Het-1A Cell Line
HL60 cells + clioquinol, 13uM _vs_ DMSO vehicle	8.85387	Chemical	Clioquinol	GSE5258	HL-60 Cell Line
Breast adenocarcinoma MCF7 cells + 6hr 100uM ketoconazole _vs_ DMSO	8.82391	Chemical	ketoconazole	GSE69851	MCF7 Cell Line
Endometrial adenocarcinoma Ishikawa cells treated 24hr with 1uM Genistein _vs_ 24hr vehicle	8.82391	Chemical	Genistein	GSE71717	Ishikawa Cell Line
Glioma stem cells treated with 1uM Siomycin A for 24hr _vs_ DMSO control	8.82391	Chemical	siomycin A	GSE50227	Primary cells - cultured
Hepatocellular carcinoma HepG2 cells + carbamazepine 14hr _vs_ DMSO	8.82391	Chemical	Carbamazepine	GSE54254	Hep G2 Cell Line
HL60 cells + 15-delta prostaglandin J2, 10uM _vs_ DMSO vehicle	8.82391	Chemical	15-deoxy-delta(12,14)-prostaglandin J2	GSE5258	HL-60 Cell Line
SKGT4 adenocarcinoma cell line treated for 24hr with 300uM deoxycholic acid _vs_ untreated	8.82391	Chemical	Deoxycholic Acid	GSE13400	SK-GT-4 Cell Line
HCT116 colon cancer cells + hydroxyurea 24hr _vs_ untreated control	8.76955	Chemical	Hydroxyurea	GSE3176	HCT 116 Cell Line
HL60 cells + chlorhexidine, 8uM _vs_ DMSO vehicle	8.76955	Chemical	Chlorhexidine	GSE5258	HL-60 Cell Line
Colorectal cancer SW620 cells + 10uM Y15 (FAK inhibitor) for 24hr _vs_ untreated	8.74473	Chemical	Y15	GSE53617	SW 620 Cell Line
Endometrial adenocarcinoma Ishikawa cells treated 8hr with 1uM Genistein _vs_ 1hr vehicle	8.74473	Chemical	Genistein	GSE71717	Ishikawa Cell Line
Hepatocellular carcinoma hepatocyte HepaRG cells + 6hr 100uM clobetasol _vs_ DMSO	8.74473	Chemical	clobetasol	GSE69851	HepaRG Cell Line
MCF7 cells + clotrimazole, 11.6uM _vs_ DMSO vehicle	8.74473	Chemical	Clotrimazole	GSE5258	MCF7 Cell Line
MCF7 cells + homochlorcyclizine, 10.4uM _vs_ DMSO vehicle	8.74473	Chemical	homochlorocyclizine	GSE5258	MCF7 Cell Line
Hepatocytes of female donors treated 24hr with 600uM methapyrilene _vs_ 0uM	8.72125	Chemical	Methapyrilene	TG-GATES	Primary cells - cultured
MCF7 cells + etacrynic acid, 13.2uM _vs_ DMSO vehicle	8.72125	Chemical	Ethacrynic Acid	GSE5258	MCF7 Cell Line
NHBE cells 24hr post-exposure to 15min of reference cigarette smoke _vs_ mock exposure	8.72125	Chemical	Tobacco smoke	GSE10700	Primary cells
Endometrial cancer HEC-151 cells + 10X IC50 concentration of paclitaxel for 24hr _vs_ untreated	8.69897	Chemical	Paclitaxel	GSE50832	HEC-151 Cell Line
hESC in serum-replacement medium - SRM treated for 24hr _vs_ control	8.67778	Chemical	SRM	GSE11302	Not annotated
Prostate adenocarcinoma C4-2 cells 24hr with 10uM BMS-303141 _vs_ vehicle	8.67778	Chemical	BMS-303141	GSE81796	C4-2 Cell Line
Rhabdomyosarcoma RMS13 - parental cells 10uM MAL3-101 treated for 9hr _vs_ DMSO control	8.67778	Chemical	MAL3-101	GSE80525	SJRH30 Cell Line
Breast adenocarcinoma MCF-7 cells 24hr treated with 110nM AgNPs _vs_ untreated controls	8.65758	Chemical	Silver Nanoparticles	GSE84982	MCF7 Cell Line
MCF7 cells + trifluoperazine, 8.4uM _vs_ DMSO vehicle	8.65758	Chemical	Trifluoperazine	GSE5258	MCF7 Cell Line
HepG2 hepatocellular carcinoma cell line 80uM DDT treated for 48hr _vs_ DMSO control	8.61979	Chemical	DDT	GSE28878	Hep G2 Cell Line
HCC Hep G2 cells treated for 24hr - 200uM nimesulide _vs_ DMSO controls	8.60206	Chemical	nimesulide	GSE10200	Hep G2 Cell Line
Hepatocytes of female donors treated 8hr with 100uM benzbromarone _vs_ 0uM	8.60206	Chemical	Benzbromarone	TG-GATES	Primary cells - cultured
PC3 cells + anisomycin, 15uM _vs_ DMSO vehicle	8.60206	Chemical	Anisomycin	GSE5258	PC-3 Cell Line [prostate cancer]
PC3 cells + mometasone, 7.6uM _vs_ DMSO vehicle	8.60206	Chemical	mometasone furoate	GSE5258	PC-3 Cell Line [prostate cancer]
Breast cancer MCF7 cells + 12hr 10uM Britanin _vs_ DMSO	8.58503	Chemical	Britanin	GSE85871	MCF7 Cell Line
Esophageal squamous cell carcinoma KYSE170 cells treated 12hr with 50ug/ml EDHB _vs_ untreated	8.58503	Chemical	ethyl protocatechuate	GSE58024	KYSE170 Cell Line
Hepatocellular carcinoma HepG2 cells 2uM benzo(a)pyrene treated 12hr _vs_ DMSO vehicle control	8.58503	Chemical	Benzo(a)pyrene	GSE36243	Hep G2 Cell Line
Hepatocytes of female donors treated 8hr with 4000uM propylthiouracil _vs_ 0uM	8.58503	Chemical	Propylthiouracil	TG-GATES	Primary cells - cultured
PC3 cells + chlorprothixene, 11.4uM _vs_ DMSO vehicle	8.58503	Chemical	Chlorprothixene	GSE5258	PC-3 Cell Line [prostate cancer]
HepG2 hepatocellular carcinoma cell line 2mM pCres treated for 12hr _vs_ EtOH control	8.56864	Chemical	cresidine	GSE28878	Hep G2 Cell Line
Papillary thyroid carcinoma B-CPAP cells - 24hr with 10uM FAK inhibitor Y15 _vs_ untreated controls	8.5376	Chemical	Y15	GSE55603	B-CPAP Cell Line
MCF7 cells + puromycin, 7.4uM _vs_ DMSO vehicle	8.50864	Chemical	Puromycin	GSE5258	MCF7 Cell Line
Diffuse_large B cell lymphoma OCI-LY3 cells + 22uM rapamycin for 6hr _vs_ untreated	8.48149	Chemical	rapamycin	GSE51068	OCI-LY-3 Cell Line
PC3 prostate cancer cells + 5.5uM 4-hydroperoxy cyclophosphamide 48hr _vs_ untreated	8.46852	Chemical	4-hydroperoxy cyclophosphamide	GSE27930	PC-3 Cell Line [prostate cancer]
Breast cancer MCF7 cells - cystine deprived media treated 24hr _vs_ control media	8.45593	Chemical	Cystine	GSE62673	MCF7 Cell Line
Embryonic kidney T-REx-293 cells 6hr with 10uM ER proteostasis regulator compound 263 _vs_ DMSO	8.45593	Chemical	compound 293	GSE84636	293 Cell Line
HL60 cells + menadione, 23.2uM _vs_ DMSO vehicle	8.45593	Chemical	menadione	GSE5258	HL-60 Cell Line
HL60 cells + sanguinarine, 12uM _vs_ DMSO vehicle	8.45593	Chemical	sanguinarine	GSE5258	HL-60 Cell Line
MCF7 breast cancer cells treated 8hr with 0.5mM H2O2 _vs_ untreated	8.45593	Chemical	Hydrogen peroxide	GSE10061	MCF7 Cell Line
Lymphoblastoid cell lines pulsed 6hr with thapsigargin + 24hr continuous salubrinal _vs_ DMSO	8.4437	Chemical	Thapsigargin	GSE31447	Cell line
Endometrial carcinoma ECC-1 cells + 50uM DEHP for 48hr _vs_ vehicle (DMSO)	8.4318	Chemical	Diethylhexyl Phthalate	GSE43653	ECC-1 Cell Line
Ishikawa cell line (ERÎ±, ERÎ² and PGR positive) 1uM BPA treated for 8hr _vs_ control 8hr	8.42022	Chemical	bisphenol A	GSE17624	Ishikawa Cell Line
T24 bladder cancer cells hypericin with light activation and PD169316 _vs_ no light activation	8.40894	Chemical	hypericin	E-MEXP-1220	T24 Cell Line
Hepatocytes of female donors treated 8hr with 500uM furosemide _vs_ 0uM	8.38722	Chemical	Furosemide	TG-GATES	Primary cells - cultured
Hepatocytes of female donors treated 8hr with 2500uM furosemide _vs_ 0uM	8.37675	Chemical	Furosemide	TG-GATES	Primary cells - cultured
Hepatocytes of female donors treated 8hr with 600uM omeprazole _vs_ 0uM	8.37675	Chemical	Omeprazole	TG-GATES	Primary cells - cultured
Ewing's sarcoma of bone TC-71 cells treated 6hr with 25nM bortezomib _vs_ DMSO controls	8.35655	Chemical	bortezomib	GSE80640	TC-71 Cell Line
Glioma stem cells treated with 2uM cannabidiol 48hr _vs_ vehicle control	8.35655	Chemical	Cannabidiol	GSE57978	Primary cells - cultured
MCF7 cells + pararosaniline, 10uM _vs_ DMSO vehicle	8.34679	Chemical	pararosaniline	GSE5258	MCF7 Cell Line
PC3 cells + loperamide, 7.8uM _vs_ DMSO vehicle	8.34679	Chemical	Loperamide	GSE5258	PC-3 Cell Line [prostate cancer]
LnCap prostate adenocarcinoma cells treated 6hr with 20uM gedunin _vs_ vehicle	8.33724	Chemical	gedunin	GSE5506	LNCaP Cell Line
N/Tert-1 foreskin keratinocytes expressing HPV 8E6 + 2ug/ml mitomycin C 18hr _vs_ H2O ctrl	8.30103	Chemical	Mitomycin	GSE50568	Cell line
Glioblastoma U87 cells + IC50 concentration of ruthenium-based compound, RDC for 24hr _vs_ untreate	8.29243	Chemical	Ruthenium Compounds	GSE66493	U-87 MG Cell Line
MCF7 cells + prochlorperazine, 10uM _vs_ DMSO vehicle	8.29243	Chemical	Prochlorperazine	GSE5258	MCF7 Cell Line
Dermal fibroblasts (NHDF) - 3uM sphingosine-1-phosphate treated 24hr _vs_ untreated_GPL6480	8.284	Chemical	sphingosine 1-phosphate	GSE56308	Primary cells - cultured
Prostate cancer androgen-dependent LnCaP cells + 15uM sulforaphane for 24hr _vs_ vehicle (DMSO)	8.284	Chemical	sulforafan	GSE48812	LNCaP Cell Line
MCF7 cells + thioridazine, 10uM _vs_ DMSO vehicle	8.26761	Chemical	Thioridazine	GSE5258	MCF7 Cell Line
Breast cancer MDA-MB-231 cells (ER-) + 10uM GW3965 (LXR agonist) for 48hr _vs_ control (ethanol)	8.25964	Chemical	GW 3965	GSE34987	MDA-MB-231 Cell Line
MCF7 cells + ciclopirox, 15uM _vs_ DMSO vehicle	8.25964	Chemical	ciclopirox	GSE5258	MCF7 Cell Line
PC3 cells + strophanthidin, 9.8uM _vs_ DMSO vehicle	8.25964	Chemical	Strophanthidin	GSE5258	PC-3 Cell Line [prostate cancer]
HL60 cells + niclosamide, 12.2uM _vs_ DMSO vehicle	8.25181	Chemical	Niclosamide	GSE5258	HL-60 Cell Line
MCF10A cells expressing PIK3CA E545K mutant - LY294002 treated 4hr _vs_ untreated	8.25181	Chemical	LY 294002	GSE33403	MCF 10A Cell Line
Hepatocytes of female donors treated 24hr with 4000uM propylthiouracil _vs_ 0uM	8.22915	Chemical	Propylthiouracil	TG-GATES	Primary cells - cultured
Colorectal cancer Caco-2 cells 24hr treated with 1.5ug/ml AgNO3 _vs_ untreated controls	8.21467	Chemical	Silver Nitrate	GSE84982	Caco-2 Cell Line
HL60 cells + labetalol, 11uM _vs_ DMSO vehicle	8.21467	Chemical	Labetalol	GSE5258	HL-60 Cell Line
786-O cells + CBDivE_003943 _vs_ DMSO	8.20761	Chemical	CBDivE_003943	GSE13818	786-O Cell Line
Hepatocytes of female donors treated 24hr with 2500uM furosemide _vs_ 0uM	8.19382	Chemical	Furosemide	TG-GATES	Primary cells - cultured
Hepatocytes of female donors treated 8hr with 400uM diclofenac _vs_ 0uM	8.19382	Chemical	Diclofenac	TG-GATES	Primary cells - cultured
Nalm27 line treated with L-asp for 4 hr _vs_ pretreatment	8.18709	Chemical	Asparagine	GSE4397	Cell line
Hepatocellular carcinoma HepG2 cells + necrosis causing compounds for 24hr _vs_ vehicle (PBS)	8.1549	Chemical	Necrosis causing compounds	GSE51952	Hep G2 Cell Line
HCC Hep G2 cells treated for 6hr - 400uM nimesulide _vs_ DMSO controls	8.14267	Chemical	nimesulide	GSE10200	Hep G2 Cell Line
HL60 myeloid leukemia cells expressing USP2 shRNA - 2d post 32nM PMA _vs_ untreated	8.13668	Chemical	pma	GSE20476	HL-60 Cell Line
K562 myelogenous leukemia cells treated 72hr with 50uM hemin _vs_ untreated	8.11919	Chemical	Hemin	GSE1036	K-562 Cell Line
PC3 cells + thiethylperazine, 6uM _vs_ DMSO vehicle	8.11919	Chemical	Thiethylperazine	GSE5258	PC-3 Cell Line [prostate cancer]
Histiocytic lymphoma U937 cells ZXDC1/2 shRNA uninduced - 100nM PMA for 3d _vs_ vehicle	8.10791	Chemical	pma	GSE45417	U-937 Cell Line
Hepatocytes of female donors treated 8hr with 150uM nifedipine _vs_ 0uM	8.10237	Chemical	Nifedipine	TG-GATES	Primary cells - cultured
MCF7 cells treated with sangivamycin _vs_ untreated	8.09691	Chemical	sangivamycin	GSE13477	MCF7 Cell Line
Hepatocellular carcinoma HepG2 cells + 8hr 200uM tert-butylhydroperoxide _vs_ 8hr controls	8.09151	Chemical	tert-Butyl hydroperoxide (70% Solution in Water)	GSE39291	Hep G2 Cell Line
Melanoma cell line A375 650nM MLN4924 treated 4hr _vs_ DMSO control	8.09151	Chemical	MLN4924	GSE30531	A-375 Cell Line
K562 myelogenous leukemia cells treated 48hr with 50uM hemin _vs_ untreated	8.07572	Chemical	Hemin	GSE1036	K-562 Cell Line
Hepatocytes of female donors treated 24hr with 100uM benzbromarone _vs_ 0uM	8.0655	Chemical	Benzbromarone	TG-GATES	Primary cells - cultured
Lung fibroblasts DTT 12hr _vs_ DTT 0hr	8.06048	Chemical	Dithiothreitol	GSE4301	Primary cells
Liposarcoma cells isolated from tumors treated 24hr with 0.5ug/ml doxorubicin _vs_ vehicle	8.05552	Chemical	Doxorubicin	GSE12972	Primary cells - cultured
Breast cancer UACC-812 cells + 10X IC50 concentration of eribulin for 24hr _vs_ untreated	8.03621	Chemical	eribulin	GSE50832	UACC812 Cell Line
Dendritic cells derived from monocytes treated 24hr with 10ug/mL ZnO particles _vs_ 24hr untreated	8.03621	Chemical	Zinc Oxide Nanoparticles	GSE39444	Primary cells - cultured
Pulmonary artery endothelial cells exposed to ultrafine particles _vs_ vehicle	8.02228	Chemical	ultrafine particles	GSE4567	Primary cells - cultured
HL60 cells + suloctidil, 11.8uM _vs_ DMSO vehicle	8.01773	Chemical	Suloctidil	GSE5258	HL-60 Cell Line
Colon cancer SW620 cells after 48hr with 60ug/mL supercritical rosemary extract _vs_ 48hr untreated	8.01323	Chemical	rosemary oil	GSE56496	SW 620 Cell Line
B-lymphoma U937 cells treated with NO-releasing prodrug JS-K for 24hr _vs_ vehicle	8.00436	Chemical	Nitric Oxide	GSE42344	U-937 Cell Line
Breast adenocarcinoma MCF7 cells + 6hr 100uM clobetasol _vs_ DMSO	8	Chemical	clobetasol	GSE69851	MCF7 Cell Line
Lung epithelium A549 cells 200ug/ml silica treated from 24hr _vs_ untreated	8	Chemical	Silicon Dioxide	GSE30215	A549 Cell Line
Hepatocellular carcinoma HepG2 cells + 550uM diclofenac for 24hr _vs_ vehicle (PBS)	7.95861	Chemical	Diclofenac	GSE51952	Hep G2 Cell Line
Lung cancer A549 cells treated for 1wk - 10% cigarette smoke extract _vs_ untreated controls	7.95861	Chemical	Tobacco smoke	GSE77942	A549 Cell Line
Ovarian carcinoma TOV112D cells (p53[R175H] mutant) + 24hr 1uM NSC319726 _vs_ untreated controls	7.95861	Chemical	NSC319726	GSE35972	TOV-112D Cell Line
Clear cell renal cell carcinoma cell lines - 75nM A939572 treated 24hr _vs_ DMSO control	7.92082	Chemical	A939572	GSE41485	Cell line
HepG2 hepatocellular carcinoma cell line 300uM 2CMP treated for 24hr _vs_ DMSO control	7.92082	Chemical	2CMP	GSE28878	Hep G2 Cell Line
HL60 cells + betulin, 9uM _vs_ DMSO vehicle	7.92082	Chemical	betulin	GSE5258	HL-60 Cell Line
Lung fibroblasts DTT 36hr _vs_ DTT 0hr	7.92082	Chemical	Dithiothreitol	GSE4301	Primary cells
Swan-71 trophoblast cell line + CoCl2 (600nM) 24hr _vs_ PBS	7.92082	Chemical	cobaltous chloride	GSE31679	Swan 71 Cell Line
Breast adenocarcinom MDA-MB-231 cells treated with 10uM compound A for 2hr _vs_ vehicle	7.88606	Chemical	2-(4-acetoxyphenyl)-2-chloro-N-methyl-ethylammonium chloride	GSE56022	MDA-A1 Cell Line
MCF7 cells + cloperastine, 11uM _vs_ DMSO vehicle	7.88606	Chemical	cloperastine	GSE5258	MCF7 Cell Line
Breast cancer MCF7 cells - arginine deprived media treated 24hr _vs_ control media	7.85387	Chemical	Arginine	GSE62673	MCF7 Cell Line
Breast cancer MDA-MB-231 cells 48hr with 5uM PIN1 inhibitor KPT-6566 _vs_ 0.05-0.01% DMSO	7.85387	Chemical	KPT-6566	GSE84909	MDA-MB-231 Cell Line
HL60 cells + hesperetin, 13.2uM _vs_ DMSO vehicle	7.85387	Chemical	hesperetin	GSE5258	HL-60 Cell Line
PC3 cells + cloperastine, 11uM _vs_ DMSO vehicle	7.85387	Chemical	cloperastine	GSE5258	PC-3 Cell Line [prostate cancer]
Colorectal cancer cells (LS174T) with shRNA targeting HUWE1 - 20uM BI8622 16hr_vs _ DMSO	7.82391	Chemical	BI8622	GSE59223	LS174T Cell Line
Dermal fibroblasts of systemic sclerosis patients + 50ug/mL rottlerin for 24hr _vs_ PBS	7.82391	Chemical	rottlerin	GSE23741	Primary cells - cultured
A549 lung cancer cells + ZnOAc2 + PCI-5002 _vs_ vehicle	7.79588	Chemical	sapphyrin	GSE6972	A549 Cell Line
Hepatic stellate cell myofibroblasts 48hr - 27uM nortriptyline _vs_ ethanol controls	7.79588	Chemical	Nortriptyline	GSE78853	Primary cells - cultured
HL60 cells + fendiline, 11.4uM _vs_ DMSO vehicle	7.79588	Chemical	Fendiline	GSE5258	HL-60 Cell Line
Acute monocytic leukemia THP-1 cells treated 6hr with 10uM mebendazole _vs_ DMSO control	7.76955	Chemical	Mebendazole	GSE96544	THP-1 Cell Line
Bronchial epithelial AIR-100 cells 4hr post 21min 15% cigarette smoke exposure _vs_ synthetic air	7.76955	Chemical	Tobacco smoke	E-MTAB-874	Primary cells - cultured
Diffuse large B-cell lymphoma DOHH-2 cells - 300nM ST7612AA1 treated 8hr _vs_ DMSO	7.76955	Chemical	ST7612AA1	GSE62460	DOHH-2 Cell Line
Hepatocellular carcinoma HepG2 cells + steatosis causing compounds for 24hr _vs_ vehicle (DMSO)	7.76955	Chemical	steatosis causing compounds	GSE51952	Hep G2 Cell Line
HepG2 hepatocellular carcinoma cells treated 6hr with 100nM GW7647 _vs_ vehicle	7.76955	Chemical	GW 7647	GSE25547	Hep G2 Cell Line
Papillary thyroid carcinoma TPC-1 cells - 24hr with 10uM FAK inhibitor Y15 _vs_ untreated controls	7.76955	Chemical	Y15	GSE55603	TPC-1 Cell Line [Thyroid Papillary Carcinoma]
TK6 spherocytic spleen cells 200uM formaldehyde treated 24hr _vs_ untreated	7.76955	Chemical	formalin	GSE41296	TK6 Cell Line
HepG2 hepatocellular carcinoma cell line 3uM CsA treated for 12hr _vs_ DMSO control	7.74473	Chemical	Cyclosporine	GSE28878	Hep G2 Cell Line
HL60 cells + acacetin, 14uM _vs_ DMSO vehicle	7.74473	Chemical	acacetin	GSE5258	HL-60 Cell Line
Lymphoblastoid cell lines pulsed 3hr with thapsigargin _vs_ DMSO	7.74473	Chemical	Thapsigargin	GSE31447	Cell line
Multiple myeloma RPMI8226 cells + 20uM Sal003 (Salubrinal analog) for 24hr _vs_ untreated	7.74473	Chemical	salubrinal	GSE60981	RPMI 8226 Cell Line
Villous cytotrophoblast cells cultured for 3hr _vs_ 0hr (freshly isolated)	7.72125	Chemical	Miscellaneous	GSE86171	Primary cells - cultured
Bronchial epithelial BEAS-2B cells treated 3wk - 0.5uM HgCl2 _vs_ acetone controls	7.69897	Chemical	Mercuric Chloride	GSE83886	BEAS-2B Cell Line
hESCs grown on MEFs+Sphingosine-1-P _vs_ untreated	7.69897	Chemical	sphingosine 1-phosphate	GSE7896	Cell line
HL60 cells + mefloquine, 9.6uM _vs_ DMSO vehicle	7.69897	Chemical	Mefloquine	GSE5258	HL-60 Cell Line
U87 glioblastoma cells treated for 24hr with 10uM Y15 _vs_ untreated	7.69897	Chemical	Y15	GSE43452	Primary cells - cultured
Breast cancer MCF7 cells + 12hr with 10uM each T-IIA SA-Aa PA S-B (see bioset details) _vs_ DMSO	7.65758	Chemical	salvianic acid A sodium	GSE85871	MCF7 Cell Line
HUVEC cells + 1 mM of CORM-3 (CO-releasing molecules-3) _vs_ untreated cells	7.65758	Chemical	tricarbonylchloro(glycinato)ruthenium(II)	GSE22175	Primary cells
Hybridoma EA.hy926 cells grown in low folate level treated 48hr 0.5uM MTX _vs_ untreated controls	7.65758	Chemical	Methotrexate	GSE32008	EA.hy926 Hybridoma Line
NHBE cells 8hr post-exposure to 15min of reference cigarette smoke _vs_ light cigarette smoke	7.65758	Chemical	Tobacco smoke	GSE10700	Primary cells
PC3 cells + parthenolide, 16.2uM _vs_ DMSO vehicle	7.65758	Chemical	parthenolide	GSE5258	PC-3 Cell Line [prostate cancer]
HCC Hep G2 cells treated for 12hr - 25uM nefazodone _vs_ DMSO controls	7.63827	Chemical	nefazodone	GSE10200	Hep G2 Cell Line
HL60 cells + verteporfin, 2.8uM _vs_ DMSO vehicle	7.63827	Chemical	verteporfin	GSE5258	HL-60 Cell Line
PC3 cells + 1,4-chrysenequinone, 15.4uM _vs_ DMSO vehicle	7.63827	Chemical	1,4-chrysenequinone	GSE5258	PC-3 Cell Line [prostate cancer]
PC3 cells + labetalol, 11uM _vs_ DMSO vehicle	7.63827	Chemical	Labetalol	GSE5258	PC-3 Cell Line [prostate cancer]
Serous ovarian adenocarcinoma cell lines + 300mM diclofenac for 24hr _vs_ untreated	7.63827	Chemical	Diclofenac	GSE45052	Cell line
TK6 spherocytic spleen cells 1ug/ml colcemid treated 24hr _vs_ untreated	7.63827	Chemical	Colcemid	GSE41296	TK6 Cell Line
Cervical cancer HeLa cells treated 6hr with 2.5uM CDDO (Bardoxolone) _vs_ DMSO	7.61979	Chemical	methyl 2-cyano-3,12-dioxoolean-1,9-dien-28-oate	GSE75247	HeLa Cell Line
Myeloma NCI-H929 cells treated 24hr with 1uM CHR 2797 _vs_ untreated controls	7.61979	Chemical	CHR 2797	GSE20405	NCI-H929 Cell Line
T cells CD4+ anti-CD2-CD3-CD28 stimulated - 3.3ug/ml edelfosine 30hr _vs_ untreated	7.61979	Chemical	edelfosine	GSE44392	Blood fraction
Hepatocellular carcinoma HepG2 cells + 8hr with 100uM menadione _vs_ 8hr controls	7.60206	Chemical	menadione	GSE39291	Hep G2 Cell Line
HepG2 hepatocellular carcinoma cell line 2mM Lindane treated for 48hr _vs_ DMSO control	7.58503	Chemical	Lindane	GSE28878	Hep G2 Cell Line
Bronchial epithelial AIR-100 cells 4hr post 14min 15% cigarette smoke exposure _vs_ synthetic air	7.56864	Chemical	Tobacco smoke	E-MTAB-874	Primary cells - cultured
Chronic meylogenous leukemia K-562 cells - 100nM Dasatinib 4hr _vs_ DMSO control	7.55284	Chemical	dasatinib	GSE51083	K-562 Cell Line
MCF10A cells expressing PIK3CA H1047R mutant - LY294002 treated 24hr _vs_ untreated	7.55284	Chemical	LY 294002	GSE33403	MCF 10A Cell Line
Primary hepatocytes + 400uM clinafloxacin for 24hr _vs_ control	7.55284	Chemical	clinafloxacin	GSE9166	Primary cells
Bronchial mucoepidermoid carcinoma cell line H292 + 48hr 8uM pyocyanin _vs_ untreated	7.5376	Chemical	Pyocyanine	GSE22430	NCI-H292 Cell Line [lung cancer]
Neuroblastoma CHP-100 cells treated 6hr with 25nM bortezomib _vs_ DMSO controls	7.5376	Chemical	bortezomib	GSE80640	CHP-100 Cell Line
PC3 cells + helveticoside, 7.4uM _vs_ DMSO vehicle	7.5376	Chemical	helveticoside	GSE5258	PC-3 Cell Line [prostate cancer]
Acute biphenotypic leukemia MV-4-11 cells treated with 500nM JQ1-PA _vs_ DMSO controls	7.52288	Chemical	JQ1	GSE88750	MV-4-11 Cell Line
Lung fibroblasts menadione 12hr _vs_ menadione 0hr	7.50864	Chemical	menadione	GSE4301	Lung fibroblasts
Prostate epithelial PrEC cells, normal + 15uM sulforaphane for 24hr _vs_ vehicle (DMSO)	7.49485	Chemical	sulforafan	GSE48812	Cell line
786-O cells + CBDivE_003943 _vs_ media control	7.48149	Chemical	CBDivE_003943	GSE13818	786-O Cell Line
Bronchial epithelial AIR-100 cells 4hr post 28min 15% cigarette smoke exposure _vs_ synthetic air	7.48149	Chemical	Tobacco smoke	E-MTAB-874	Primary cells - cultured
MCF7 cells + mifepristone, 9.4uM _vs_ DMSO vehicle	7.48149	Chemical	RU486	GSE5258	MCF7 Cell Line
U-266 cells 10uM 5-Azacytidine treated 4hr _vs_ untreated	7.46852	Chemical	Azacitidine	GSE56623	U-266B1 Cell Line
HL60 cells + thioridazine, 9.8uM _vs_ DMSO vehicle	7.45593	Chemical	Thioridazine	GSE5258	HL-60 Cell Line
Bronchial epithelial cells COPD patients - current smokers _vs_ ex-smoker	7.4437	Chemical	Tobacco smoke	GSE37147	Primary tissue - fresh or fresh frozen
MCF7 cells + raloxifene, 7.8uM _vs_ DMSO vehicle	7.4437	Chemical	Raloxifene	GSE5258	MCF7 Cell Line
SK-OV-3 ovarian cancer cells 10uM cisplatin treated 24hr _vs_ untreated	7.4318	Chemical	Cisplatin	GSE38545	SK-OV-3 Cell Line
Breast cancer MCF7 cells - glutamine deprived media treated 24hr _vs_ control media	7.42022	Chemical	Glutamine	GSE62673	MCF7 Cell Line
Breast cancer MCF-7 cells wildtype treated 8hr with 4uM nutlin-3 _vs_ mock	7.42022	Chemical	nutlin 3	GSE84986	MCF7 Cell Line
Hepatocytes of female donors treated 24hr with 75uM adapin _vs_ 0uM	7.42022	Chemical	adapin	TG-GATES	Primary cells - cultured
HepG2 hepatocellular carcinoma cell line 2uM BaP treated for 12hr _vs_ DMSO control	7.42022	Chemical	Benzo(a)pyrene	GSE28878	Hep G2 Cell Line
Hepatocytes of female donors treated 8hr with 200uM naphthyl isothiocyanate _vs_ 0uM	7.40894	Chemical	1-Naphthylisothiocyanate	TG-GATES	Primary cells - cultured
HL60 cells + prenylamine, 9.6uM _vs_ DMSO vehicle	7.40894	Chemical	Prenylamine	GSE5258	HL-60 Cell Line
PC3 cells + oxyphenbutazone, 12.4uM _vs_ DMSO vehicle	7.40894	Chemical	Oxyphenbutazone	GSE5258	PC-3 Cell Line [prostate cancer]
HL60 cells + podophyllotoxin, 9.6uM _vs_ DMSO vehicle	7.39794	Chemical	Podophyllotoxin	GSE5258	HL-60 Cell Line
Hepatocytes of female donors treated 8hr with 600uM methapyrilene _vs_ 0uM	7.38722	Chemical	Methapyrilene	TG-GATES	Primary cells - cultured
HL60 cells + fluspirilene, 8.4uM _vs_ DMSO vehicle	7.37675	Chemical	Fluspirilene	GSE5258	HL-60 Cell Line
HL60 myeloid leukemia cells expressing USP2 shRNA - 1d post 32nM PMA _vs_ untreated	7.37675	Chemical	pma	GSE20476	HL-60 Cell Line
Pediatric glioma SF188 cells treated 48hr with IGC-001 _vs_ DMSO	7.37675	Chemical	ICG 001	GSE83266	Cell line
Primary mesothelial HM3 cells, peritoneal + 5ug/cm2 crocidolite asbestos for 8hr _vs_ unexposed	7.36653	Chemical	Asbestos, Crocidolite	GSE63966	Cell line
Hepatocytes of female donors treated 24hr with 15uM perhexiline _vs_ 0uM	7.35655	Chemical	Perhexiline	TG-GATES	Primary cells - cultured
HL60 cells + bromocriptine, 5.4uM _vs_ DMSO vehicle	7.35655	Chemical	Bromocriptine	GSE5258	HL-60 Cell Line
Lung epithelium A549 cells 800ug/ml silica treated from 6hr _vs_ untreated	7.34679	Chemical	Silicon Dioxide	GSE30180	A549 Cell Line
Primary mesothelial HPM3 cells, pleural + 5ug/cm2 crocidolite asbestos for 8hr _vs_ unexposed	7.34679	Chemical	Asbestos, Crocidolite	GSE63966	Cell line
Bronchial epithelial cells treated 1hr with tobacco smoke + 5hr recovery in culture _vs_ untreated	7.3279	Chemical	Tobacco smoke	E-TABM-127	Primary cells - cultured
MCF7 breast cancer cells 10uM nutlin3a treated for 8hr _vs_ untreated	7.3279	Chemical	nutlin 3	GSE30183	MCF7 Cell Line
Prostate adenocarcinoma LNCaP cells treated 24hr with 10uM GSK525762A _vs_ DMSO vehicle	7.3279	Chemical	GSK525762A	GSE56352	LNCaP Cell Line
T cell Jurkat A3 cells treated 24hr with 50ug/mL methoxyl ZnO particles _vs_ 24hr untreated	7.3279	Chemical	Zinc Oxide Nanoparticles	GSE39444	A3 Cell Line
Bronchial epithelial BEAS-2B cells treated 3wk - 0.5uM HgCl2 and 2nM TCDD _vs_ acetone controls	7.30103	Chemical	Mercuric Chloride	GSE83886	BEAS-2B Cell Line
Primary keratinocytes in high Ca differentiation conditions _vs_ low Ca growth conditions	7.30103	Chemical	Calcium	GSE18590	Primary cells
LCLs from family A cancer-free members treated 4hr with 10mM caffeine _vs_ untreated controls	7.29243	Chemical	Caffeine	GSE37210	Cell line
TK6 spherocytic spleen cells 4ug/ml vincristine treated 24hr _vs_ untreated	7.29243	Chemical	Vincristine	GSE41296	TK6 Cell Line
T cell Jurkat A3 cells treated 24hr with 10ug/mL folic acid ZnO particles _vs_ 24hr untreated	7.284	Chemical	Zinc Oxide Nanoparticles	GSE39444	A3 Cell Line
Hep G2 hepatocarcinoma cell line cultured for 12hr with 10nM benzo(a)pyrene _vs_ 0.5% DMSO	7.27572	Chemical	Benzo(a)pyrene	E-MEXP-2574	Hep G2 Cell Line
Jurkat T-cells 6hr post 80uM Cobalt (II) chloride treatment _vs_ untreated	7.25964	Chemical	cobaltous chloride	GSE46909	Jurkat Cell Line
Hepatocytes of male donors treated 24hr with 1000uM metformin _vs_ 0uM	7.25181	Chemical	Metformin	TG-GATES	Primary cells - cultured
HepG2 hepatocellular carcinoma cell line 250uM DZN treated for 48hr _vs_ DMSO control	7.25181	Chemical	Diazinon	GSE28878	Hep G2 Cell Line
PC3 cells + wortmannin, 0.01uM _vs_ DMSO vehicle	7.25181	Chemical	wortmannin	GSE5258	PC-3 Cell Line [prostate cancer]
AML MOLM-13 cells with ENL sgRNA knockdown treated 24hr with 50nM JQ1 _vs_ DMSO	7.24413	Chemical	JQ1	GSE80774	MOLM-13 Cell Line
Breast cancer ZR75-1 cells sensitive to indole-3-carbinol + 200uM I3C 24hr _vs_ control (DMSO)	7.24413	Chemical	indole-3-carbinol	GSE55897	ZR-75-1 Cell Line
MCF7 cells + docosahexaenoic acid ethyl ester, 100uM _vs_ DMSO vehicle	7.24413	Chemical	4,7,10,13,16,19-docosahexaenoic acid ethyl ester	GSE5258	MCF7 Cell Line
HL60 cells + piperlongumine, 12.6uM _vs_ DMSO vehicle	7.22915	Chemical	piperlonguminine	GSE5258	HL-60 Cell Line
Prostate cancer VCaP cells (AR+ ERG-fusion+) - 500nM JQ1 24hr _vs_ untreated	7.22185	Chemical	JQ1	GSE55063	VCaP Cell Line
PC3 cells + lanatoside C, 4uM _vs_ DMSO vehicle	7.21467	Chemical	lanatoside C	GSE5258	PC-3 Cell Line [prostate cancer]
TK6 spherocytic spleen cells 4ug/ml colcemid treated 24hr _vs_ untreated	7.21467	Chemical	Colcemid	GSE41296	TK6 Cell Line
Hepatocellular HepG2 cells cultured without leucine _vs_ with leucine	7.20761	Chemical	Leucine	GSE13142	Hep G2 Cell Line
HL60 cells + tanespimycin, 1uM _vs_ DMSO vehicle	7.20066	Chemical	17-(allylamino)-17-demethoxygeldanamycin	GSE5258	HL-60 Cell Line
SUP-B15 line treated with L-asp for 4 hr _vs_ pretreatment	7.19382	Chemical	Asparagine	GSE4397	SUP-B15 Cell Line
Hepatocellular carcinoma HepG2 cells + 4hr with 100uM menadione _vs_ 4hr controls	7.18709	Chemical	menadione	GSE39291	Hep G2 Cell Line
Non-small cell lung cancer cell line H1299 + 1uM azacitidine for 48hr _vs_ control	7.18709	Chemical	Azacitidine	GSE29077	NCI-H1299 Cell Line
Macrophages from monocytes treated 4hr with 50ng/ml LPS _vs_ DMSO controls	7.17393	Chemical	LPS	GSE76802	Primary cells - cultured
PC3 cells + norcyclobenzaprine, 15.4uM _vs_ DMSO vehicle	7.16749	Chemical	norcyclobenzaprine	GSE5258	PC-3 Cell Line [prostate cancer]
HL60 cells + 8-azaguanine, 26.2uM _vs_ DMSO vehicle	7.16115	Chemical	Azaguanine	GSE5258	HL-60 Cell Line
Hepatocytes of female donors treated 8hr with 7500uM caffeine _vs_ 0uM	7.1549	Chemical	Caffeine	TG-GATES	Primary cells - cultured
Breast cancer UACC-893 cells + 10X IC50 concentration of eribulin for 24hr _vs_ untreated	7.14267	Chemical	eribulin	GSE50832	UACC893 Cell Line
MCF7 cells + fluphenazine, 10uM _vs_ DMSO vehicle	7.14267	Chemical	Fluphenazine	GSE5258	MCF7 Cell Line
Mesenchymal stem cells + huvECs co-culture 5uM cyclopamine treated for 12d _vs_ untreated	7.13668	Chemical	cyclopamine	GSE22293	HUVECs
Monocyte derived dendritic cells matured via galectin-1 _vs_ vehicle	7.13077	Chemical	Galectin 1	GSE4984	Not annotated
MDA-MB-453 breast cancer cell line + 20 ug/ml actein for 6hr _vs_ DMSO control	7.12494	Chemical	actein	GSE7848	MDA-MB-453 Cell Line
MDA-MB-453 breast cancer cell line + 40 ug/ml actein for 6hr _vs_ DMSO control	7.12494	Chemical	actein	GSE7848	MDA-MB-453 Cell Line
Prostate cancer LNCaP cells cultured 48hr - 30uM MK591 treated for 16hr _vs_ untreated	7.10791	Chemical	MK 0591	GSE64574	LNCaP Cell Line
MCF7 cells + clofilium tosylate, 7.8uM _vs_ DMSO vehicle	7.09151	Chemical	U 54494A	GSE5258	MCF7 Cell Line
TK6 spherocytic spleen cells 1ug/ml vincristine treated 24hr _vs_ untreated	7.07058	Chemical	Vincristine	GSE41296	TK6 Cell Line
Bronchial epithelial cells treated 1hr with tobacco smoke + 23hr recovery in culture _vs_ untreated	7.06048	Chemical	Tobacco smoke	E-TABM-127	Primary cells - cultured
MDA-MB-436 breast cancer cells treated 7d with 10nM AG014699 _vs_ DMSO	7.05061	Chemical	AG 014699	GSE34817	MDA-MB-436 Cell Line
U87 glioblastoma cells treated for 24hr with 20uM temozolomide and 10uM Y15 _vs_ untreated	7.03152	Chemical	temozolomide	GSE43452	Primary cells - cultured
Breast cancer MDA-MB-231 cells insensitive to indole-3-carbinol + 200uM I3C 24hr _vs_ control (DMSO)	7.02687	Chemical	indole-3-carbinol	GSE55897	MDA-MB-231 Cell Line
Embryonic kidney T-REx-293 cells 6hr with 1uM thapsigargin _vs_ DMSO	7.01773	Chemical	Thapsigargin	GSE84636	293 Cell Line
HepG2 hepatocellular carcinoma cell line 250uM AZA treated for 24hr _vs_ DMSO control	7.00436	Chemical	Azacitidine	GSE28878	Hep G2 Cell Line
B-cell lymphoma cell line - apomorphine hydrochloride treated for 24hr _vs_ DMSO control	7	Chemical	apomorphine hydrochloride	GSE60408	B-cell lymphoma
Breast cancer MCF7 cells - isoleucine deprived media treated 24hr _vs_ control media	7	Chemical	isoleucine deprived media	GSE62673	MCF7 Cell Line
HepG2 hepatocellular carcinoma cell line 1mM BZ treated for 24hr _vs_ DMSO control	7	Chemical	benzidine	GSE28878	Hep G2 Cell Line
HL60 cells + puromycin, 7.4uM _vs_ DMSO vehicle	7	Chemical	Puromycin	GSE5258	HL-60 Cell Line
Liver carcinoma HepG2 cells - 2uM cadmium treated for 24hr _vs_ untreated	7	Chemical	Cadmium	GSE31286	Hep G2 Cell Line
MCF7 cells + betulin, 9uM _vs_ DMSO vehicle	7	Chemical	betulin	GSE5258	MCF7 Cell Line
A549 lung adenocarcinoma cells in media without serine + 1uM compound 16 6hr _vs_ DMSO	6.95861	Chemical	compound 16	GSE40191	A549 Cell Line
Bronchial epithelial BEAS-2B cells treated 3wk - 2nM TCDD _vs_ acetone controls	6.95861	Chemical	Tetrachlorodibenzodioxin	GSE83886	BEAS-2B Cell Line
HL60 cells + minocycline, 8uM _vs_ DMSO vehicle	6.95861	Chemical	Minocycline	GSE5258	HL-60 Cell Line
Neuroblastoma CHP-100 cells treated 6hr with 25nM MG-262 _vs_ DMSO controls	6.95861	Chemical	MG 262	GSE80640	CHP-100 Cell Line
Non-small cell lung cancer cell line H1299 + 3uM azacitidine for 48hr _vs_ control	6.95861	Chemical	Azacitidine	GSE29077	NCI-H1299 Cell Line
PC3 cells + LY-294002, 10uM _vs_ DMSO vehicle	6.95861	Chemical	LY 294002	GSE5258	PC-3 Cell Line [prostate cancer]
TK6 spherocytic spleen cells 320uM methyl methanesulfonate treated 4hr _vs_ untreated	6.95861	Chemical	Methyl Methanesulfonate	GSE41296	TK6 Cell Line
Fibroblasts expressing GALT - in hexosefree media _vs_ galactose	6.92082	Chemical	Galactose	GSE4864	Cell line
Hepatoma HepaRG cells + 72hr 7.5mM IC10 NNK _vs_ 0.5% DMSO	6.92082	Chemical	4-(acetoxymethylnitrosamino)-1-(3-pyridyl)-1-butanone	GSE40117	HepaRG Cell Line
MCF7 cells + tanespimycin, 1uM _vs_ DMSO vehicle	6.92082	Chemical	17-(allylamino)-17-demethoxygeldanamycin	GSE5258	MCF7 Cell Line
T cell Jurkat A3 cells treated 24hr with 10ug/mL methoxyl ZnO particles _vs_ 24hr untreated	6.92082	Chemical	Zinc Oxide Nanoparticles	GSE39444	A3 Cell Line
Dendritic cells derived from monocytes treated 6hr with 10ug/mL ZnO particles _vs_ 6hr untreated	6.88606	Chemical	Zinc Oxide Nanoparticles	GSE39444	Primary cells - cultured
HL60 cells + 1,4-chrysenequinone, 15.4uM _vs_ DMSO vehicle	6.88606	Chemical	1,4-chrysenequinone	GSE5258	HL-60 Cell Line
Lung cancer A549 cells treated overnight with 50uM enterobactin _vs_ PBS	6.88606	Chemical	Enterobactin	GSE54962	A549 Cell Line
PC3 cells + lycorine, 12.4uM _vs_ DMSO vehicle	6.88606	Chemical	lycorine	GSE5258	PC-3 Cell Line [prostate cancer]
Acute biphenotypic leukemia MV-4-11 cells treated with 500nM JQ1 _vs_ DMSO controls	6.85387	Chemical	JQ1	GSE88750	MV-4-11 Cell Line
HL60 cells + tomatidine, 9.6uM _vs_ DMSO vehicle	6.85387	Chemical	tomatidine	GSE5258	HL-60 Cell Line
MCF7 cells + profenamine, 11.4uM _vs_ DMSO vehicle	6.85387	Chemical	profenamine	GSE5258	MCF7 Cell Line
Monocytes exposed to diseal exhaust particles in vitro _vs_ saline control	6.85387	Chemical	Diesel Exhaust	GSE34025	Primary cells - cultured
TK6 spherocytic spleen cells 2ug/ml colcemid treated 24hr _vs_ untreated	6.85387	Chemical	Colcemid	GSE41296	TK6 Cell Line
TK6 spherocytic spleen cells 2ug/ml vincristine treated 24hr _vs_ untreated	6.85387	Chemical	Vincristine	GSE41296	TK6 Cell Line
HepG2 hepatocellular carcinoma cells treated 24hr with 100nM GW7647 _vs_ vehicle	6.82391	Chemical	GW 7647	GSE25547	Hep G2 Cell Line
MCF7 cells + naftifine, 12.4uM _vs_ DMSO vehicle	6.82391	Chemical	naftifine	GSE5258	MCF7 Cell Line
Neuroblastoma cell line SH-SY5Y + thapsigargin _vs_ DMSO	6.82391	Chemical	Thapsigargin	GSE24500	SH-SY5Y Cell Line
PC3 cells + thiostrepton, 2.4uM _vs_ DMSO vehicle	6.82391	Chemical	Thiostrepton	GSE5258	PC-3 Cell Line [prostate cancer]
Pterygia cells from Hispanic patients 500ug/mL doxycycline treated 24hr _vs_ untreated	6.82391	Chemical	doxycycline	GSE34736	Primary cells - cultured
T cell Jurkat A3 cells treated 24hr with 25ug/mL methoxyl ZnO particles _vs_ 24hr untreated	6.82391	Chemical	Zinc Oxide Nanoparticles	GSE39444	A3 Cell Line
Colorectal cancer HCT116 cells with wildtype P53 - 0.5mg/mL brefeldin A treated 24hr _vs_ untreated	6.79588	Chemical	Brefeldin A	GSE63252	HCT 116 Cell Line
HL60 cells + amoxapine, 12.8uM _vs_ DMSO vehicle	6.79588	Chemical	Amoxapine	GSE5258	HL-60 Cell Line
Ovarian cancer A2780 cells + 10X IC50 concentration of eribulin for 24hr _vs_ untreated	6.79588	Chemical	eribulin	GSE50832	A2780 Cell Line
TK6 spherocytic spleen cells 160uM methyl methanesulfonate treated 24hr _vs_ untreated	6.79588	Chemical	Methyl Methanesulfonate	GSE41296	TK6 Cell Line
U251 glioma cells DFO-stimulated (hypoxia-mimetic) _vs_ unstimulated untreated control	6.79588	Chemical	Deferoxamine mesylate	GSE7835	U-251 MG Cell Line
Breast cancer MCF7 cells - tryptophan deprived media treated 24hr _vs_ control media	6.76955	Chemical	Tryptophan	GSE62673	MCF7 Cell Line
Dermal fibroblasts (C18) - 3uM sphingosine-1-phosphate treated 16hr _vs_ untreated_GPL6480	6.76955	Chemical	sphingosine 1-phosphate	GSE56308	Primary cells - cultured
Hepatocellular carcinoma HepG2 cells + 250uM azathioprine for 24hr _vs_ vehicle (DMSO)	6.76955	Chemical	Azathioprine	GSE51952	Hep G2 Cell Line
Monocytes cultured in IL4 and GM-CSF + 1uM rosiglitazone 6hr _vs_ freshly isloated monocytes	6.76955	Chemical	rosiglitazone	GSE8658	Primary cells - cultured
PC3 cells + ebselen, 14.6uM _vs_ DMSO vehicle	6.76955	Chemical	ebselen	GSE5258	PC-3 Cell Line [prostate cancer]
PC3 prostate cancer cells normoxic (20% O2) condition - NO sulindac (25uM)_vs_ DMSO control	6.76955	Chemical	NCX 1102	GSE34112	PC-3 Cell Line [prostate cancer]
Hepatocellular carcinoma HepG2 cells + 72hr 10mM IC10 NNK _vs_ PBS	6.74473	Chemical	4-(acetoxymethylnitrosamino)-1-(3-pyridyl)-1-butanone	GSE40117	Hep G2 Cell Line
Hybridoma EA.hy926 cells grown in normal folate level treated 48hr 0.5uM MTX _vs_ untreated control	6.74473	Chemical	Methotrexate	GSE32008	EA.hy926 Hybridoma Line
Jurkat T-cells 6hr post 30uM Fluoxetine treatment _vs_ untreated	6.74473	Chemical	Fluoxetine	GSE46909	Jurkat Cell Line
Leukemic CUTLL1 T-lymphocytes 2uM GSKJ4 treated 48hr _vs_ untreated	6.74473	Chemical	GSKJ4	GSE56691	CUTLL1 Cell Line
Macrophages treated 6hr with 100ug glucan from baker's yeast _vs_ untreated controls	6.74473	Chemical	beta-1,3-glucan	GSE32282	Primary cells - cultured
Glioblastoma cell lines pooled + 300nM trichostatin A 18hr _vs_ control	6.72125	Chemical	trichostatin A	GSE11233	Cell line
Hepatocytes treated 72hr with 40uM atorvastatin _vs_ DMSO	6.72125	Chemical	atorvastatin	GSE29868	Primary cells - cultured
Monocytic cell line MONO-MAC-6 10ng/mL PMA treated _vs_ untreated	6.72125	Chemical	pma	GSE11462	MONO-MAC-6 Cell Line
PC3 cells + deptropine, 7.6uM _vs_ DMSO vehicle	6.72125	Chemical	Tropanes	GSE5258	PC-3 Cell Line [prostate cancer]
Diffuse_large B cell lymphoma OCI-LY3 cells + 0.31uM camptothecin for 24hr _vs_ untreated	6.69897	Chemical	camptothecin	GSE51068	OCI-LY-3 Cell Line
Hepatocytes of female donors treated 8hr with 70uM allyl alcohol _vs_ 0uM	6.69897	Chemical	allyl alcohol	TG-GATES	Primary cells - cultured
HL60 cells + 10-methoxyharmalan, 18.6uM _vs_ DMSO vehicle	6.69897	Chemical	1-methyl-6-methoxy-dihydro-beta-carboline	GSE5258	HL-60 Cell Line
HPBM-macrophages + 10uM simvastatin for 24hr _vs_ vehicle	6.69897	Chemical	Simvastatin	GSE4883	Blood fraction
MSCs treated with importazole _vs_ solvent control	6.69897	Chemical	2,4-diaminoquinazoline	GSE83559	Primary cells - cultured
Subcutaneous adipose biopsies of healthy subjects treated with 3ng/kg LPS - 4hr after _vs_ before	6.69897	Chemical	LPS	GSE39117	Primary tissue - fresh or fresh frozen
HL60 cells + mebendazole, 13.6uM _vs_ DMSO vehicle	6.67778	Chemical	Mebendazole	GSE5258	HL-60 Cell Line
Primary mesothelial HPM4 cells, pleural + 5ug/cm2 crocidolite asbestos for 8hr _vs_ unexposed	6.67778	Chemical	Asbestos, Crocidolite	GSE63966	Cell line
Caco-2 colon adenocarcinoma cells treated 24hr with 100uM hemin _vs_ untreated	6.65758	Chemical	Hemin	GSE3573	Caco-2 Cell Line
Hepatocytes of female donors treated 24hr with 15uM ketoconazole _vs_ 0uM	6.65758	Chemical	Ketoconazole	TG-GATES	Primary cells - cultured
Hepatocytes of female donors treated 24hr with 3500uM disopyramide _vs_ 0uM	6.63827	Chemical	Disopyramide	TG-GATES	Primary cells - cultured
TK6 spherocytic spleen cells 1mM ethyl methanesulfonate treated 4hr _vs_ untreated	6.63827	Chemical	Ethyl Methanesulfonate	GSE41296	TK6 Cell Line
B-cell lymphoma cell line - auranofin treated for 12hr _vs_ DMSO control	6.61979	Chemical	auranofin	GSE60408	B-cell lymphoma
Bronchial epithelial cells patients without COPD - current smokers _vs_ ex-smoker	6.61979	Chemical	Tobacco smoke	GSE37147	Primary tissue - fresh or fresh frozen
Hepatocyte-like cells derived from ESCs + 72hr 1615uM IC10 clonidine _vs_ 0.5% DMSO	6.61979	Chemical	Clonidine	GSE40117	Primary cells - cultured
LP9 mesothelial cells exposed 8hr to 5ug/cm2 crocidolite asbestos _vs_ untreated	6.61979	Chemical	Asbestos, Crocidolite	GSE14034	Meso LP9 Cell Line
MSK-Leuk1 oral leukoplakia cells treated 6hr with tobacco smoke condensate _vs_ PBS control	6.61979	Chemical	Tobacco smoke	GSE10063	Cell line
PC3 cells + syrosingopine, 6uM _vs_ DMSO vehicle	6.61979	Chemical	syrosingopine	GSE5258	PC-3 Cell Line [prostate cancer]
Pterygia cells from Hispanic patients 200ug/mL doxycycline treated 24hr _vs_ untreated	6.61979	Chemical	doxycycline	GSE34736	Primary cells - cultured
cHL cell lines + 5-aza-dC 5uM 5d _vs_ untreated	6.60206	Chemical	5-azacytidine	GSE8388	Cell line
Ovarian cancer cell line OV2008 1uM NVP-BEZ235 treated 6hr _vs_ DMSO control	6.60206	Chemical	NVP BEZ235	GSE28992	Ov2008 Cell Line
HCT116 colon cancer cells + hydroxyurea 12hr _vs_ untreated control	6.58503	Chemical	Hydroxyurea	GSE3176	HCT 116 Cell Line
HeLa cervical cancer cells cultured 24hr without glucose _vs_ normal conditions with FBS	6.58503	Chemical	Glucose	GSE33050	HeLa Cell Line
HMEC + DEP 25mcg _vs_ control HMEC	6.58503	Chemical	Vehicle Emissions	GSE6584	HMECs
MT-2 cells + 5nM bortezomib _vs_ vehicle	6.58503	Chemical	bortezomib	GSE6034	Cell line
TK6 spherocytic spleen cells 320uM methyl methanesulfonate treated 24hr _vs_ untreated	6.58503	Chemical	Methyl Methanesulfonate	GSE41296	TK6 Cell Line
Whole blood 200ng/ml Pam3CSK4 stimulated 24hr _vs_ media control	6.58503	Chemical	Pam(3)CSK(4) peptide	GSE55375	Whole blood
Cervical cancer HeLa cells treated 6hr with 10uM GTPP _vs_ DMSO	6.56864	Chemical	gamitrinib-G4	GSE75247	HeLa Cell Line
Colon cancer SW620 cells after 48hr with 100ug/mL supercritical rosemary extract _vs_ 48hr untreate	6.56864	Chemical	rosemary oil	GSE56496	SW 620 Cell Line
Dermal fibroblasts (C18) - 3uM sphingosine-1-phosphate treated 8hr _vs_ untreated_GPL6480	6.56864	Chemical	sphingosine 1-phosphate	GSE56308	Primary cells - cultured
Hepatocytes of female donors treated 24hr with 330uM nimesulide _vs_ 0uM	6.56864	Chemical	nimesulide	TG-GATES	Primary cells - cultured
Hepatocytes of female donors treated 24hr with 70uM allyl alcohol _vs_ 0uM	6.56864	Chemical	allyl alcohol	TG-GATES	Primary cells - cultured
Melanoma cell line A375 650nM MLN4924 treated 8hr _vs_ DMSO control	6.56864	Chemical	MLN4924	GSE30531	A-375 Cell Line
PC3 cells + digoxigenin, 10.2uM _vs_ DMSO vehicle	6.56864	Chemical	Digoxigenin	GSE5258	PC-3 Cell Line [prostate cancer]
HepG2 hepatocellular carcinoma cell line 60uM MOCA treated for 24hr _vs_ DMSO control	6.55284	Chemical	Methylenebis(chloroaniline)	GSE28878	Hep G2 Cell Line
Lung epithelium A549 cells 400ug/ml silica treated from 6hr _vs_ untreated	6.5376	Chemical	Silicon Dioxide	GSE30200	A549 Cell Line
Retinal pigment epithelial hTERT RPE-1 cells 24hr 0.5uM Reversine treated _vs_ untreated	6.5376	Chemical	Reversine	GSE60570	hTERT RPE-1 Cell Line
Keratinocyte HaCaT cells with 2ug/ml AMP18 for 24hr _vs_ 2hr	6.52288	Chemical	AMP18	GSE73330	HaCaT Cell Line
MCF7 cells + chlorprothixene, 11.4uM _vs_ DMSO vehicle	6.52288	Chemical	Chlorprothixene	GSE5258	MCF7 Cell Line
RKO human colorectal carcinoma cells + 60uM 4-hydroxy-2-nonenal (HNE) 6hr _vs_ control 6hr	6.52288	Chemical	4-hydroxy-2-nonenal	GSE2397	RKO Cell Line
Breast cancer MCF7 cells - phenylalanine deprived media treated 24hr _vs_ control media	6.50864	Chemical	Phenylalanine	GSE62673	MCF7 Cell Line
Cervical carcinoma HeLa-HIV cells treated 24hr with 10uM 1C8 compound _vs_ untreated controls	6.50864	Chemical	1C8	GSE76947	HeLa Cell Line
Hepatocyte-like cells of patients with hepatotoxicity + 100uM pazopanib for 24hr _vs_ DMSO	6.50864	Chemical	pazopanib	GSE75888	Primary cells - cultured
HepG2 hepatocellular carcinoma cell line 2mM DMN treated for 24hr _vs_ DMSO control	6.50864	Chemical	Dimethylnitrosamine	GSE28878	Hep G2 Cell Line
Liver slices precision cut and cultured with diclofenac _vs_ untreated	6.49485	Chemical	Diclofenac	GSE54255	Primary cells - cultured
Lung airway epithelial cell line CFTR wildtype - 15uM DMNQ treated for 24hr _vs_ untreated	6.49485	Chemical	2,3-dimethoxy-1,4-naphthoquinone	GSE39843	Cell line
Myeloma NCI-H929 cells treated 24hr with 250nM CHR 3996 _vs_ untreated controls	6.49485	Chemical	CHR 3996	GSE20405	NCI-H929 Cell Line
HL60 cells + mometasone, 7.6uM _vs_ DMSO vehicle	6.48149	Chemical	mometasone furoate	GSE5258	HL-60 Cell Line
MCF7 cells + econazole, 9uM _vs_ DMSO vehicle	6.48149	Chemical	Econazole	GSE5258	MCF7 Cell Line
Acute myeloid leukemia KG1 cells treated 12hr with 5mM XX-650-23 _vs_ DMSO	6.46852	Chemical	XX-650-23	GSE74928	KG-1 Cell Line
Ependymoma IN1638 primary cells treated 96hr with 5uM 5-aza2-deoxycytidine _vs_ 96hr untreated	6.45593	Chemical	5-azacytidine	GSE45437	Primary cells - cultured
Whole blood 200ng/ml Pam3CSK4 stimulated 24hr _vs_ 0hr control	6.4437	Chemical	Pam(3)CSK(4) peptide	GSE55375	Whole blood
HL60 cells + terfenadine, 8.4uM _vs_ DMSO vehicle	6.4318	Chemical	Terfenadine	GSE5258	HL-60 Cell Line
Neuroblastoma cell line SH-SY5Y + tunicamycin _vs_ DMSO	6.4318	Chemical	Tunicamycin	GSE24500	SH-SY5Y Cell Line
Hepatocellular carcinoma HepaRG cells - 2.4mM 5 NGTX Fumonisin B1 24hr _vs_ DMSO control	6.42022	Chemical	fumonisin B1	GSE48990	HepaRG Cell Line
Breast adenocarcinoma MCF7 cells + 6hr 1mM clofibrate _vs_ DMSO	6.39794	Chemical	clofibrate	GSE69851	MCF7 Cell Line
Breast adenocarcinoma MCF7 cells treated with 1uM PP242 then 4hr with 1uM PaPE _vs_ EtOH controls	6.39794	Chemical	Heterocyclic Compounds	GSE73663	MCF7 Cell Line
Embryonic stem H9 cells on matrigel mTeSR1 media + 20uM PluriSIn#6 for 12hr _vs_ vehicle (DMSO)	6.39794	Chemical	PluriSIn#6	GSE37040	H9 Stem Cell Line
LNCAP cells TrichostatinA treated _vs_ vehicle treated	6.39794	Chemical	trichostatin A	GSE8645	LNCaP Cell Line
Fibrosarcoma HT-1080 cells - 20uM PhenDC3 treated for 48hr _vs_ vehicle (DMSO) only	6.38722	Chemical	360A compound	GSE60630	HT 1080 Cell Line
T cell Jurkat A3 cells treated 24hr with 10ug/mL mandelic acid ZnO particles _vs_ 24hr untreated	6.37675	Chemical	Zinc Oxide Nanoparticles	GSE39444	A3 Cell Line
Breast tumors with high (18)FDG radiotracer uptake _vs_ low uptake_GPL96	6.36653	Chemical	Fluorodeoxyglucose F18	GSE21217	Primary cells
HL60 cells + etacrynic acid, 13.2uM _vs_ DMSO vehicle	6.36653	Chemical	Ethacrynic Acid	GSE5258	HL-60 Cell Line
AML THP-1 cells treated 24hr with 50ug/ml graphene oxide _vs_ untreated controls	6.35655	Chemical	Graphene	GSE99929	THP-1 Cell Line
MCF7 breast cancer cells in 1% O2 10mM Lactate pH 6.7 24hr _vs_ untreated control	6.35655	Chemical	lactic acid	GSE29406	MCF7 Cell Line
Hepatocytes of female donors treated 8hr with 15uM ketoconazole _vs_ 0uM	6.34679	Chemical	Ketoconazole	TG-GATES	Primary cells - cultured
MCF7 cells + ticlopidine, 13.4uM _vs_ DMSO vehicle	6.34679	Chemical	Ticlopidine	GSE5258	MCF7 Cell Line
Melanoma Me23682 cells control siRNA for 24hr then 150nM fotemustine treated 6hr _vs_ untreated	6.34679	Chemical	fotemustine	GSE34686	Cell line
PC3 cells + maprotiline, 12.8uM _vs_ DMSO vehicle	6.34679	Chemical	Maprotiline	GSE5258	PC-3 Cell Line [prostate cancer]
Lung cancer A549 cells + nonsense shRNA + 24hr 100nM dexamethasone _vs_ nonsense shRNA + untreated	6.33724	Chemical	Dexamethasone	GSE35962	A549 Cell Line
PC3 cells + metixene, 11.6uM _vs_ DMSO vehicle	6.33724	Chemical	methixene	GSE5258	PC-3 Cell Line [prostate cancer]
Immortalized mesothelial LP cells, peritoneal + 5ug/cm2 crocidolite asbestos for 8hr _vs_ unexposed	6.3279	Chemical	Asbestos, Crocidolite	GSE63966	Immortalized Cell Line
K562 myelogenous leukemia cells treated 24hr with 50uM hemin _vs_ untreated	6.3279	Chemical	Hemin	GSE1036	K-562 Cell Line
CD34+ cells from Acute Myelogenous Leukemia patients - 7.5uM Parthenolide treated 6hr _vs_ Untreated	6.31876	Chemical	parthenolide	GSE7538	Primary cells
Diffuse large B-cell lymphoma TMD8 cells - 300nM ST7612AA1 treated 8hr _vs_ DMSO	6.3098	Chemical	ST7612AA1	GSE62460	TMD8 Cell Line
Fibrosarcoma HT1080 cells - 100uM quercetin treated for 24hr _vs_ DMSO control	6.3098	Chemical	Quercetin	GSE59368	HT 1080 Cell Line
Glioblastoma U87 cells + IC50 concentration of cisplatin for 6hr _vs_ untreated	6.3098	Chemical	Cisplatin	GSE66493	U-87 MG Cell Line
Prostate adenocarcinoma LNCaP cells treated 24hr with 20uM GSK8814 _vs_ DMSO controls	6.30103	Chemical	GSK8814	GSE78868	LNCaP Cell Line
MCF7 cells + kaempferol, 14uM _vs_ DMSO vehicle	6.29243	Chemical	kaempferol	GSE5258	MCF7 Cell Line
Prostate cancer 22Rv1 cells 24hr exposed to hypoxia and 1uM vorinostat _vs_ DMSO	6.29243	Chemical	vorinostat	GSE80657	22Rv1 Cell Line
Bronchial epithelial cells (after 5hr recovery in culture) treated 1hr with tobacco smoke _vs_ air	6.284	Chemical	tobacco smoke	E-TABM-127	Primary cells - cultured
Hepatocytes of female donors treated 24hr with 250uM diazepam _vs_ 0uM	6.284	Chemical	Diazepam	TG-GATES	Primary cells - cultured
MCF7 cells + gossypol, 7.8uM _vs_ DMSO vehicle	6.284	Chemical	Gossypol	GSE5258	MCF7 Cell Line
HL60 cells + dobutamine, 11.8uM _vs_ DMSO vehicle	6.27572	Chemical	Dobutamine	GSE5258	HL-60 Cell Line
Hepatocytes of female donors treated 24hr with 10000uM phenobarbital _vs_ 0uM	6.26761	Chemical	Phenobarbital	TG-GATES	Primary cells - cultured
PC3 cells + digoxin, 5.2uM _vs_ DMSO vehicle	6.25964	Chemical	Digoxin	GSE5258	PC-3 Cell Line [prostate cancer]
PC3 cells + levomepromazine, 9uM _vs_ DMSO vehicle	6.25964	Chemical	levomepromazine	GSE5258	PC-3 Cell Line [prostate cancer]
Diffuse_large B cell lymphoma OCI-LY3 cells + 22uM rapamycin for 24hr _vs_ untreated	6.24413	Chemical	rapamycin	GSE51068	OCI-LY-3 Cell Line
PC3 cells + digitoxigenin, 10.6uM _vs_ DMSO vehicle	6.24413	Chemical	Digitoxigenin	GSE5258	PC-3 Cell Line [prostate cancer]
Prostate adenocarcinoma LNCaP cells 48hr with 50nM CEP701 _vs_ DMSO controls	6.24413	Chemical	CEP-701	GSE97398	LNCaP Cell Line
HL60 cells + securinine, 18.4uM _vs_ DMSO vehicle	6.23657	Chemical	securinine	GSE5258	HL-60 Cell Line
Umbilical vein endothelial cells treated 24hr with 100uM sparstolonin B _vs_ DMSO vehicle controls	6.23657	Chemical	sparstolonin B	GSE44597	Primary cells - cultured
Breast cancer MCF7 cells + 10nM NSC 59687 (oxyphenisatin acetate) for 24hr _vs_ controls (DMSO)	6.22915	Chemical	Oxyphenisatin Acetate	GSE45046	MCF7 Cell Line
Bronchial epithelial AIR-100 cells 2hr post 21min 15% cigarette smoke exposure _vs_ synthetic air	6.22915	Chemical	Tobacco smoke	E-MTAB-874	Primary cells - cultured
MCF7 cells + trifluoperazine, 10uM _vs_ DMSO vehicle	6.22915	Chemical	Trifluoperazine	GSE5258	MCF7 Cell Line
PC3 cells + hexetidine, 11.8uM _vs_ DMSO vehicle	6.22915	Chemical	Hexetidine	GSE5258	PC-3 Cell Line [prostate cancer]
Diffuse_large B cell lymphoma OCI-LY3 cells + 22uM rapamycin for 12hr _vs_ untreated	6.22185	Chemical	rapamycin	GSE51068	OCI-LY-3 Cell Line
Ewing's sarcoma of bone TC-71 cells treated 6hr with 500nM EWS-P _vs_ DMSO controls	6.22185	Chemical	EWS-P	GSE80640	TC-71 Cell Line
Fibroblast IMR90 cells vector 5d - 100nM etoposide 7d DNA damage induced senescence _vs_ growing	6.22185	Chemical	etoposide	GSE53379	IMR-90 Cell Line
A549 lung cancer xenografts + PCI-5002 _vs_ vehicle	6.20761	Chemical	sapphyrin	GSE6972	A549 Cell Line
HL60 cells + oxedrine, 24uM _vs_ DMSO vehicle	6.20066	Chemical	Synephrine	GSE5258	HL-60 Cell Line
MCF7 cells + perphenazine, 10uM _vs_ DMSO vehicle	6.20066	Chemical	Perphenazine	GSE5258	MCF7 Cell Line
Fibroblast IMR90 cells vector 5d - 100nM etoposide 24hr acute DNA damage response _vs_ growing	6.19382	Chemical	etoposide	GSE53379	IMR-90 Cell Line
HL60 cells + genistein, 10uM _vs_ DMSO vehicle	6.19382	Chemical	Genistein	GSE5258	HL-60 Cell Line
Leukemic cells (K562) 20uM mesoporphyrin treated for 20hr _vs_ DMSO control	6.19382	Chemical	mesoporphyrin	GSE52087	K-562 Cell Line
Lymphoblastoid TK6 cells mock-irradiated - 0hr 1nM TPA-treated _vs_ 0hr DMSO	6.19382	Chemical	phorbolol myristate acetate	GSE71521	TK6 Cell Line
A549 lung adenocarcinoma cells in media without serine + 1uM compound 16 24hr _vs_ DMSO	6.18709	Chemical	compound 16	GSE40191	A549 Cell Line
Breast cancer MCF7 cells after 24hr - treated with 2mg/mL CKI _vs_ untreated controls	6.18709	Chemical	kushen	GSE78512	MCF7 Cell Line
Embryonic kidney SCL60 cells (overexpressing GnRH-R) + 24hr 100nM triptorelin _vs_ vehicle	6.18709	Chemical	Triptorelin Pamoate	GSE27467	Cell line
HL60 cells + astemizole, 8.8uM _vs_ DMSO vehicle	6.18046	Chemical	Astemizole	GSE5258	HL-60 Cell Line
MCF7 cells + ursolic acid, 8.8uM _vs_ DMSO vehicle	6.18046	Chemical	ursolic acid	GSE5258	MCF7 Cell Line
Ovarian cancer A2780 cells + 10X IC50 concentration of paclitaxel for 24hr _vs_ untreated	6.14874	Chemical	Paclitaxel	GSE50832	A2780 Cell Line
Diffuse intrinsic pontine glioma SF8628 cells treated for 24hr - 300nM JQ1 _vs_ DMSO controls	6.14267	Chemical	JQ1	GSE78801	Cell line
MSCs treated with extracellular vesicles + importazole _vs_ extracellular vesicles only	6.14267	Chemical	2,4-diaminoquinazoline	GSE83559	Primary cells - cultured
MCF7 breast cancer cells control shRNA for 4hr - 10uM nutlin3a treated _vs_ untreated	6.13668	Chemical	nutlin 3	GSE30183	MCF7 Cell Line
Breast adenocarcinoma MCF7 cells treated with 1uM PP242 then 4hr with 10nM E2 _vs_ E2 alone	6.13077	Chemical	PP242	GSE73663	MCF7 Cell Line
Bronchial epithelial cells (after 23hr recovery in culture) treated 1hr with tobacco smoke _vs_ air	6.13077	Chemical	tobacco smoke	E-TABM-127	Primary cells - cultured
Colorectal cancer PDXs from RSPO3 fusion+ patients, host mice treated ETC-159 for 56hr _vs_ vehicle	6.13077	Chemical	ETC-159	GSE69687	Xenograft
Lung cancer HCC827 cells (EGFR L747-S752/T790M+) -72hr 2.5uM decitabine 1uM vorinostat _vs_ DMSO	6.12494	Chemical	decitabine	GSE39292	HCC827 Cell Line
Hepatocytes of female donors treated 24hr with 400uM diclofenac _vs_ 0uM	6.10791	Chemical	Diclofenac	TG-GATES	Primary cells - cultured
MCF7 cells + myricetin, 12.6uM _vs_ DMSO vehicle	6.10791	Chemical	myricetin	GSE5258	MCF7 Cell Line
Diffuse large B-cell lymphoma Karpas-422 cells treated 144hr with 5uM EED-226 _vs_ DMSO	6.09691	Chemical	EED-226	GSE81267	KARPAS-422 Cell Line
Caco-2 colon adenocarcinoma cells treated 24hr with 50uM sulphoraphane _vs_ vehicle	6.08619	Chemical	sulforafan	E-MEXP-170	Caco-2 Cell Line
Hepatocytes of female donors treated 24hr with 300uM mexiletine _vs_ 0uM	6.08092	Chemical	Mexiletine	TG-GATES	Primary cells - cultured
hESC in serum-replacement medium - CYM treated for 24hr _vs_ control	6.08092	Chemical	Cymarine	GSE11302	Not annotated
Acute monocytic leukemia cell line THP-1 + Ganoderma lucidum polysaccharides 24hr _vs_ untreated	6.07572	Chemical	lingzhi	GSE16014	THP-1 Cell Line
Melanoma A375 cells + luciferase G2-siRNA - treated 26hr with 100nM daunorubicin _vs_ 26hr DMSO	6.07572	Chemical	Daunorubicin	GSE39091	A-375 Cell Line
Prostate cancer 22Rv1 cells 24hr exposed to normoxia and 1uM vorinostat _vs_ DMSO	6.07572	Chemical	vorinostat	GSE80657	22Rv1 Cell Line
Hepatocellular carcinoma hepatocyte HepG2 cells + 6hr 10uM methotrexate _vs_ DMSO	6.06048	Chemical	methotrexate	GSE69851	Hep G2 Cell Line
HL60 cells + mifepristone, 9.4uM _vs_ DMSO vehicle	6.06048	Chemical	RU486	GSE5258	HL-60 Cell Line
HepG2 hepatocellular carcinoma cell line 12.5uM Res treated for 24hr _vs_ DMSO control	6.05552	Chemical	Reserpine	GSE28878	Hep G2 Cell Line
Mixed lineage leukemia MV-4-11 cells + 6hr 500nM I-BET151 _vs_ DMSO	6.05552	Chemical	I-BET151	GSE71777	MV-4-11 Cell Line
PC3 cells + ouabain, 5.4uM _vs_ DMSO vehicle	6.05552	Chemical	Ouabain	GSE5258	PC-3 Cell Line [prostate cancer]
Hepatocyte-like cells derived from ESCs + 72hr 180uM IC10 nifedipine _vs_ 0.5% DMSO	6.04576	Chemical	Nifedipine	GSE40117	Primary cells - cultured
LNCaP prostate cancer cells treated 24hr with 5uM trichostatin A _vs_ untreated	6.04576	Chemical	trichostatin A	GSE20433	LNCaP Cell Line
Fibrosarcoma HT1080 cells - 0.1uM etoposide treated for 24hr _vs_ DMSO control	6.03621	Chemical	Etoposide	GSE59368	HT 1080 Cell Line
Fibroblast IMR90 cells TP53 shRNA 5d - 100nM etoposide 24hr acute DNA damage response _vs_ growing	6.02687	Chemical	etoposide	GSE53379	IMR-90 Cell Line
HL60 cells + alprostadil, 11.2uM _vs_ DMSO vehicle	6.02687	Chemical	Alprostadil	GSE5258	HL-60 Cell Line
MCF7 cells + tyrphostin AG-825, 25.2uM _vs_ DMSO vehicle	6.02687	Chemical	tyrphostin AG-825	GSE5258	MCF7 Cell Line
Colorectal cancer LoVo cell line - 10mM metformin treated 8hr _vs_ untreated	6.02228	Chemical	Metformin	GSE67342	LoVo Cell Line
Hepatocytes of female donors treated 8hr with 10000uM ethionine _vs_ 0uM	6.02228	Chemical	Ethionine	TG-GATES	Primary cells - cultured
Bronchial epithelial BEAS-2B cells treated 3wk - 10nM TCDD _vs_ acetone controls	6.01323	Chemical	Tetrachlorodibenzodioxin	GSE83886	BEAS-2B Cell Line
Fibrosarcoma HT1080 cells - 3uM etoposide treated for 24hr _vs_ DMSO control	6.01323	Chemical	Etoposide	GSE59368	HT 1080 Cell Line
HepG2 hepatoma cells treated 24hr with 3mM BaP _vs_ DMSO	6.01323	Chemical	Benzo(a)pyrene	GSE25936	Hep G2 Cell Line
Dendritic cells sorted BDCA1+ from blood + 6hr 30mg/mL Gardasil _vs_ media_GPL10558	6.00877	Chemical	Gardasil	GSE44722	Not annotated
MCF7 cells + amoxapine, 12.8uM _vs_ DMSO vehicle	6.00436	Chemical	Amoxapine	GSE5258	MCF7 Cell Line
PC3 prostate cancer cells + 5.5uM 4-hydroperoxy cyclophosphamide 24hr _vs_ untreated	6.00436	Chemical	4-hydroperoxy cyclophosphamide	GSE27930	PC-3 Cell Line [prostate cancer]
786-O cells + ZINC00125864 _vs_ media control	6	Chemical	ZINC00125864	GSE13818	786-O Cell Line
Breast adenocarcinoma MCF7 cells + 6hr 100uM Flutamide _vs_ DMSO	6	Chemical	Flutamide	GSE69851	MCF7 Cell Line
Dermal fibroblasts (C18) - 3uM sphingosine-1-phosphate treated 32hr _vs_ untreated_GPL6480	6	Chemical	sphingosine 1-phosphate	GSE56308	Primary cells - cultured
Ewing sarcoma cell line A673 treated with 5-AZA 2.5 uM for 120hr _vs_ mock treated	6	Chemical	decitabine	GSE36858	A-673 Cell Line
Hepatocellular carcinoma HepG2 cells + 10mM acetominophen for 24hr _vs_ vehicle (DMSO)	6	Chemical	Acetaminophen	GSE51952	Hep G2 Cell Line
Hepatocellular carcinoma HepG2 cells + methotrexate 14hr _vs_ DMSO	6	Chemical	Methotrexate	GSE54254	Hep G2 Cell Line
HET-1A esophageal cell line treated for 4hr with 300uM deoxycholic acid _vs_ untreated	6	Chemical	Deoxycholic Acid	GSE13400	Het-1A Cell Line
HL60 cells + colchicine, 10uM _vs_ DMSO vehicle	6	Chemical	Colchicine	GSE5258	HL-60 Cell Line
HL60 cells + megestrol, 10.4uM _vs_ DMSO vehicle	6	Chemical	Megestrol	GSE5258	HL-60 Cell Line
Lung cancer A549 cell line + Dasatinib 30000nM for 20hr _vs_ control	6	Chemical	Dasatinib	E-TABM-585	A549 Cell Line
Breast cancer MCF7 cells - leucine deprived media treated 24hr _vs_ control media	5.95861	Chemical	Leucine	GSE62673	MCF7 Cell Line
Bronchial epithelial AIR-100 cells 2hr post 28min 15% cigarette smoke exposure _vs_ synthetic air	5.95861	Chemical	Tobacco smoke	E-MTAB-874	Primary cells - cultured
HCC Hep G2 cells treated for 12hr - 200uM nimesulide _vs_ DMSO controls	5.95861	Chemical	nimesulide	GSE10200	Hep G2 Cell Line
Hep G2 hepatocellular carcinoma cell line + 100uM gatifloxacin for 24hr _vs_ control	5.95861	Chemical	gatifloxacin	GSE9166	Hep G2 Cell Line
HepG2 hepatocellular carcinoma cell line 2mM Phenol treated for 48hr _vs_ DMSO control	5.95861	Chemical	Phenol	GSE28878	Hep G2 Cell Line
HepG2 hepatoma cells + amino acid deprivation response by 5mM histidinol for 4hr _vs_ no histidinol	5.95861	Chemical	Histidinol	GSE19495	Hep G2 Cell Line
HL60 cells + (+)-chelidonine, 10.8uM _vs_ DMSO vehicle	5.95861	Chemical	chelidonine	GSE5258	HL-60 Cell Line
JJN-3 cells 10mM N-methylpyrrolidone treated 24hr _vs_ untreated	5.95861	Chemical	N-methylpyrrolidone	GSE56623	JJN-3 Cell Line
Monocytes from blood + 6hr 60mg/mL Varivax _vs_ media_GPL10558	5.95861	Chemical	Varivax	GSE44722	Not annotated
TK6 spherocytic spleen cells 2mM ethyl methanesulfonate treated 4hr _vs_ untreated	5.95861	Chemical	Ethyl Methanesulfonate	GSE41296	TK6 Cell Line
Fibrosarcoma HT1080 cells - 80uM quercetin treated for 24hr _vs_ DMSO control	5.92082	Chemical	Quercetin	GSE59368	HT 1080 Cell Line
Hepatocellular carcinoma cell line HepG2 1.5ug/ml tunicamycin _vs_ untreated controls	5.92082	Chemical	Tunicamycin	GSE41666	Hep G2 Cell Line
HL60 cells + mestranol, 12.8uM _vs_ DMSO vehicle	5.92082	Chemical	Mestranol	GSE5258	HL-60 Cell Line
Lung fibroblasts menadione 8hr _vs_ menadione 0hr	5.92082	Chemical	menadione	GSE4301	Lung fibroblasts
Melanoma A375 cells + luciferase G2-siRNA - treated 26hr with 1650nM MLN4924 _vs_ 26hr DMSO	5.92082	Chemical	MLN4924	GSE39091	A-375 Cell Line
NUT midline carcinoma cell line PER-403 with BRD4-NUT fusion + 24hr 25nM trichostatin A _vs_ vehicle	5.92082	Chemical	trichostatin A	GSE18668	Cell line
SH-SY5Y neuroblastoma cells + 140nM bilirubin 24hr _vs_ DMSO	5.92082	Chemical	Bilirubin	GSE16768	SH-SY5Y Cell Line
Hepatocellular carcinoma HepG2 cells + 120uM paraquat for 24hr _vs_ vehicle (PBS)	5.88606	Chemical	Paraquat	GSE51952	Hep G2 Cell Line
Hepatocytes of female donors treated 8hr with 75uM adapin _vs_ 0uM	5.88606	Chemical	adapin	TG-GATES	Primary cells - cultured
HL60 cells + apigenin, 14.8uM _vs_ DMSO vehicle	5.88606	Chemical	Apigenin	GSE5258	HL-60 Cell Line
HL60 cells + benzethonium chloride, 9uM _vs_ DMSO vehicle	5.88606	Chemical	Benzethonium	GSE5258	HL-60 Cell Line
HL60 cells + levonorgestrel, 12.8uM _vs_ DMSO vehicle	5.88606	Chemical	Levonorgestrel	GSE5258	HL-60 Cell Line
HT-1080 cells + 2-deoxyglucose stress and 100nM rotenone 18hr _vs_ untreated control	5.88606	Chemical	rotenone	GSE16157	HT 1080 Cell Line
Lambda light chain myeloma MM 1S cells treated 24hr with BRD4 inhibitor AZD5153 _vs_ DMSO control	5.88606	Chemical	AZD5153	GSE85840	MM.1S Cell Line
MCF-7 cells + cimicifuga _vs_ vehicle	5.88606	Chemical	cimifuga	GSE6800	MCF7 Cell Line
MCF7 cells + resveratrol, 10uM _vs_ DMSO vehicle	5.88606	Chemical	resveratrol	GSE5258	MCF7 Cell Line
Multiple myeloma U266 cells + 30uM PLX4032 for 12hr _vs_ vehicle (DMSO)	5.88606	Chemical	PLX4032	GSE66293	U-266B1 Cell Line
PC3 cells + diethylstilbestrol, 15uM _vs_ DMSO vehicle	5.88606	Chemical	Diethylstilbestrol	GSE5258	PC-3 Cell Line [prostate cancer]
Breast cancer MCF7 cells - threonine deprived media treated 24hr _vs_ control media	5.85387	Chemical	Threonine	GSE62673	MCF7 Cell Line
HCT-8 colon cancer enterocyte cell line + 1 mM indole for 4hr _vs_ untreated	5.85387	Chemical	indole	GSE14379	HRT-18 Cell Line
HUVEC cells treated with fenofibrate for 18hr _vs_ untreated	5.85387	Chemical	Fenofibrate	GSE15494	HUVECs
Prostate cancer PC3 cells overexpressing ERG - 500nM JQ1 24hr _vs_ untreated	5.85387	Chemical	JQ1	GSE55063	PC-3 Cell Line [prostate cancer]
Breast cancer MCF7 cells treated with 25uM p-nonylphenol for 48hr _vs_ controls	5.82391	Chemical	nonylphenol	GSE50705	MCF7 Cell Line
H295R adrenocortical carcinoma cells + 2-OH-BDE47 _vs_ untreated	5.82391	Chemical	2-OH-BDE47	GSE8588	NCI-H295R Cell Line
Hep G2 hepatocellular carcinoma cell line + 800uM gatifloxacin for 24hr _vs_ control	5.82391	Chemical	gatifloxacin	GSE9166	Hep G2 Cell Line
Hepatoma HepaRG cells + 72hr 35uM IC10 TPA _vs_ 0.5% DMSO	5.82391	Chemical	phorbolol myristate acetate	GSE40117	HepaRG Cell Line
HL60 cells + fluticasone, 8uM _vs_ DMSO vehicle	5.82391	Chemical	fluticasone	GSE5258	HL-60 Cell Line
HL60 cells + hexestrol, 14.8uM _vs_ DMSO vehicle	5.82391	Chemical	Hexestrol	GSE5258	HL-60 Cell Line
Monocytes from blood + 6hr 60mg/mL Ixiaro _vs_ media_GPL10558	5.82391	Chemical	Ixiaro	GSE44722	Primary cells - cultured
PC3 cells + puromycin, 7.4uM _vs_ DMSO vehicle	5.82391	Chemical	Puromycin	GSE5258	PC-3 Cell Line [prostate cancer]
Prostate adenocarcinoma LNCaP cells treated 24hr with 20uM GSK8815 _vs_ DMSO controls	5.82391	Chemical	GSK8815	GSE78868	LNCaP Cell Line
Hepatocytes of female donors treated 24hr with 40uM chlormadinone _vs_ 0uM	5.79588	Chemical	Chlormadinone Acetate	TG-GATES	Primary cells - cultured
HL60 cells + isotretinoin, 13.4uM _vs_ DMSO vehicle	5.79588	Chemical	Isotretinoin	GSE5258	HL-60 Cell Line
HUVEC cells treated with fenofibrate for 4hr _vs_ untreated	5.79588	Chemical	Fenofibrate	GSE15494	HUVECs
Mantle cell lymphoma cell lines - 100nM 5-aza-dC for 72hr _vs_ mock controls	5.79588	Chemical	5-azacytidine	GSE22038	Cell line
Normal lung WI-38 cell line exposed 24hr to 0.5uM BPDE _vs_ vehicle control	5.79588	Chemical	7,8-Dihydro-7,8-dihydroxybenzo(a)pyrene 9,10-oxide	GSE19510	WI 38 Cell Line
PC3 cells + homochlorcyclizine, 10.4uM _vs_ DMSO vehicle	5.79588	Chemical	homochlorocyclizine	GSE5258	PC-3 Cell Line [prostate cancer]
Primary hepatocytes + 400uM ciprofloxacin for 24hr _vs_ control	5.79588	Chemical	Ciprofloxacin	GSE9166	Primary cells
Adult T-cell leukemia interleukin-2 independent cell line TaY-E10 + 100nM 17AAG 24hr _vs_ untreated	5.76955	Chemical	17-(allylamino)-17-demethoxygeldanamycin	GSE12287	Cell line
Diffuse_large B cell lymphoma OCI-LY3 cells + 0.101uM doxorubicin for 24hr _vs_ untreated	5.76955	Chemical	doxorubicin	GSE51068	OCI-LY-3 Cell Line
HT-1080 cells + 5ug_ml tunicamycin _vs_ untreated control	5.76955	Chemical	Tunicamycin	GSE13548	HT 1080 Cell Line
L428 cell line + 5-aza-dC 5uM 5d _vs_ untreated	5.76955	Chemical	5-azacytidine	GSE8388	Cell line
MCF7 breast cancer cells treated with bortezomib for 48hr _vs_ untreated	5.76955	Chemical	bortezomib	GSE8565	MCF7 Cell Line
MCF7 cells + atracurium besilate, 3.2uM _vs_ DMSO vehicle	5.76955	Chemical	cisatracurium	GSE5258	MCF7 Cell Line
Bronchial epithelial AIR-100 cells 2hr post 14min 15% cigarette smoke exposure _vs_ synthetic air	5.74473	Chemical	Tobacco smoke	E-MTAB-874	Primary cells - cultured
Hep G2 hepatocellular carcinoma cell line + 100uM ciprofloxacin for 24hr _vs_ control	5.74473	Chemical	Ciprofloxacin	GSE9166	Hep G2 Cell Line
Hepatocytes treated 48hr with 40uM atorvastatin _vs_ DMSO	5.74473	Chemical	atorvastatin	GSE29868	Primary cells - cultured
K562 cells treated with PMA for 6hr _vs_ untreated	5.74473	Chemical	pma	GSE12736	K-562 Cell Line
Leukemic cells (K562) 20uM Fe(III) mesoporphyrin treated for 20hr _vs_ DMSO control	5.74473	Chemical	iron(III) meso-tetramesitylporphyrin	GSE52087	K-562 Cell Line
MCF7 cells + lanatoside C, 4uM _vs_ DMSO vehicle	5.74473	Chemical	lanatoside C	GSE5258	MCF7 Cell Line
MCF7 cells + meclozine, 8.6uM _vs_ DMSO vehicle	5.74473	Chemical	Meclizine	GSE5258	MCF7 Cell Line
PC3 cells + trifluoperazine, 8.4uM _vs_ DMSO vehicle	5.74473	Chemical	Trifluoperazine	GSE5258	PC-3 Cell Line [prostate cancer]
Prostate carcinoma 22Rv1 cells treated 16hr - 10ug/ml Wedelia chinensis extract _vs_ DMSO controls	5.74473	Chemical	Plant Extracts	GSE10022	22Rv1 Cell Line
Adult T-cell leukemia interleukin-2 independent cell line TaY-E10 + 300nM 17AAG 24hr _vs_ untreated	5.72125	Chemical	17-(allylamino)-17-demethoxygeldanamycin	GSE12287	Cell line
Breast adenocarcinoma MCF7 cells treated with 1uM PP242 then 4hr with EtOH _vs_ EtOH controls	5.72125	Chemical	PP242	GSE73663	MCF7 Cell Line
HL60 cells + dihydroergotamine, 3uM _vs_ DMSO vehicle	5.72125	Chemical	Dihydroergotamine	GSE5258	HL-60 Cell Line
Kidney HK-2 cells treated with 70uM PCB-153 for 24hr _vs_ 0hr controls	5.72125	Chemical	PCB 153	GSE23494	HK-2 Cell Line
PC3 cells + beclometasone, 7.6uM _vs_ DMSO vehicle	5.72125	Chemical	Beclomethasone	GSE5258	PC-3 Cell Line [prostate cancer]
PC3 cells + beta-escin, 3.2uM _vs_ DMSO vehicle	5.72125	Chemical	Escin	GSE5258	PC-3 Cell Line [prostate cancer]
PC3 cells + dequalinium chloride, 7.6uM _vs_ DMSO vehicle	5.72125	Chemical	Dequalinium	GSE5258	PC-3 Cell Line [prostate cancer]
ALL-3 cells xenograft tumors 8hr post 15mg/kg dexamethasone treatment _vs_ prior to treatment	5.69897	Chemical	Dexamethasone	GSE30392	Xenograft
Diffuse intrinsic pontine glioma SF8628 cells treated for 3hr - 300nM JQ1 _vs_ DMSO controls	5.69897	Chemical	JQ1	GSE78801	Cell line
Hepatocellular carcinoma HepG2 cells + 72hr 0.1nM IC10 TPA _vs_ 0.5% DMSO	5.69897	Chemical	phorbolol myristate acetate	GSE40117	Hep G2 Cell Line
MCF7 cells + danazol, 11.8uM _vs_ DMSO vehicle	5.69897	Chemical	Danazol	GSE5258	MCF7 Cell Line
Ovarian cancer cell lines 3 treatment cycles 3ug/ml cisplatin _vs_ baseline_GPL570	5.69897	Chemical	Cisplatin	GSE23603	Cell line
PC3 cells + dexamethasone, 9.2uM _vs_ DMSO vehicle	5.69897	Chemical	Dexamethasone	GSE5258	PC-3 Cell Line [prostate cancer]
HL60 cells + tretinoin, 13.4uM _vs_ DMSO vehicle	5.67778	Chemical	Retinoic acid	GSE5258	HL-60 Cell Line
MCF7 cells + ouabain, 5.4uM _vs_ DMSO vehicle	5.67778	Chemical	Ouabain	GSE5258	MCF7 Cell Line
JJN-3 cells 10mM N-methylpyrrolidone treated 4hr _vs_ untreated	5.65758	Chemical	N-methylpyrrolidone	GSE56623	JJN-3 Cell Line
Mammary acinar epithelial cells + 10d 10uM 18-alpha-glycyrrhitinic acid _vs_ vehicle controls	5.65758	Chemical	Glycyrrhetinic Acid	GSE35165	HMT-3522 S1 Cell Line
MCF7 cells + anisomycin, 15uM _vs_ DMSO vehicle	5.65758	Chemical	Anisomycin	GSE5258	MCF7 Cell Line
Dermal fibroblasts (NHDF) - 3uM sphingosine-1-phosphate treated 12hr _vs_ untreated_GPL6480	5.63827	Chemical	sphingosine 1-phosphate	GSE56308	Primary cells - cultured
Lung cancer HCC827 cells with EGFR DEL15 activating mutation - 1uM BEZ235 6hr treated _vs_ DMSO	5.63827	Chemical	NVP BEZ235	GSE51212	HCC827 Cell Line
Lung fibroblasts menadione 4hr _vs_ menadione 0hr	5.63827	Chemical	menadione	GSE4301	Lung fibroblasts
THP-1 cell line infected with B. pseudomallei and ceftazidime treated _vs_ uninfected untreated	5.63827	Chemical	Ceftazidime	GSE7577	THP-1 Cell Line
BxPC-3 primary pancreatic tumor + 1uM PMA treatment for 4hr _vs_ untreated	5.61979	Chemical	phorbolol myristate acetate	GSE22973	BxPC-3 Cell Line
MCF7 cells + primaquine, 8.8uM _vs_ DMSO vehicle	5.61979	Chemical	Primaquine	GSE5258	MCF7 Cell Line
N/Tert-1 foreskin keratinocytes expressing HPV 16E6 + 2ug/ml mitomycin C 18hr _vs_ H2O ctrl	5.61979	Chemical	Mitomycin	GSE50568	Cell line
Colon cancer SW620 cells after 48hr with 30ug/mL supercritical rosemary extract _vs_ 48hr untreated	5.60206	Chemical	rosemary oil	GSE56496	SW 620 Cell Line
Fibrosarcoma HT1080 cells - 30uM quercetin treated for 24hr _vs_ DMSO control	5.60206	Chemical	Quercetin	GSE59368	HT 1080 Cell Line
Hep G2 hepatocarcinoma cell line cultured for 12hr with 10nM cyclosporin A _vs_ 0.5% DMSO	5.60206	Chemical	Cyclosporine	E-MEXP-2574	Hep G2 Cell Line
Hepatocellular carcinoma cell line HepG2 - 7uM cisplatin treated 12hr _vs_ PBS control	5.60206	Chemical	Cisplatin	GSE38122	Hep G2 Cell Line
HL60 cells + estrone, 14.8uM _vs_ DMSO vehicle	5.60206	Chemical	Estrone	GSE5258	HL-60 Cell Line
Jurkat T-cells 6hr post 130uM Lindane treatment _vs_ untreated	5.60206	Chemical	Lindane	GSE46909	Jurkat Cell Line
MCF7 breast cancer cells treated 6hr with 5x IC50 of topo II inhibitor Doxorubicin _vs_ untreated	5.60206	Chemical	Doxorubicin	GSE18552	MCF7 Cell Line
PBMCs + 1d 10uM lead acetate _vs_ 1d untreated donor-matched controls	5.60206	Chemical	lead acetate	GSE37567	Blood fraction
Breast cancer MCF7 cells - serine deprived media treated 24hr _vs_ control media	5.58503	Chemical	Serine	GSE62673	MCF7 Cell Line
Breast epithelial MCF-10A cells - 30uM ginkgolic acid treated 3d _vs_ DMSO control	5.58503	Chemical	ginkgolic acid	GSE61727	MCF 10A Cell Line
MCF7 cells + tetrandrine, 6.4uM _vs_ DMSO vehicle	5.58503	Chemical	tetrandrine	GSE5258	MCF7 Cell Line
PC3 prostate cancer cells + 0.5uM Latrunculin B (Rho-transcription inhibitor) 24hr _vs_ DMSO	5.58503	Chemical	latrunculin B	GSE30188	PC-3 Cell Line [prostate cancer]
PC3 prostate cancer cells + 0.5uM Latrunculin B (Rho-transcription inhibitor) 2hr _vs_ DMSO 24hr	5.58503	Chemical	latrunculin B	GSE30188	PC-3 Cell Line [prostate cancer]
Bronchial epithelial AIR-100 cells 24hr post 28min 15% cigarette smoke exposure _vs_ synthetic air	5.56864	Chemical	Tobacco smoke	E-MTAB-874	Primary cells - cultured
Hepatocytes of female donors treated 8hr with 50uM nitrofurazone _vs_ 0uM	5.56864	Chemical	Nitrofurazone	TG-GATES	Primary cells - cultured
Lymphoblastoid cell lines pulsed 6hr with thapsigargin + 72hr continuous salubrinal _vs_ DMSO	5.56864	Chemical	Thapsigargin	GSE31447	Cell line
MCF7 cells + propafenone, 10.6uM _vs_ DMSO vehicle	5.56864	Chemical	Propafenone	GSE5258	MCF7 Cell Line
SH-SY5Y cells transfected with control decoy + 16 nM PMA _vs_ undifferentiated (no PMA)	5.56864	Chemical	phorbolol myristate acetate	GSE4600	SH-SY5Y Cell Line
TK6 spherocytic spleen cells 2mM ethyl methanesulfonate treated 24hr _vs_ untreated	5.56864	Chemical	Ethyl Methanesulfonate	GSE41296	TK6 Cell Line
Hepatocytes of female donors treated 24hr with 150uM WY-14643 _vs_ 0uM	5.55284	Chemical	WY-14643	TG-GATES	Hepatocytes
HT-1080 cells + 2-deoxyglucose stress and 0.1 uM pyrvinium pamoate 18hr _vs_ untreated control	5.55284	Chemical	pyrvinium	GSE13548	HT 1080 Cell Line
MCF7 cells + monorden, 0.1uM _vs_ DMSO vehicle	5.55284	Chemical	monorden	GSE5258	MCF7 Cell Line
MM.1S multiple myeloma cells - 5000nM JQ1 6hr _vs_ DMSO	5.55284	Chemical	JQ1	GSE44929	MM.1S Cell Line
Prostate cancer PC3 cells + 48hr 0.5uM siomycin A _vs_ DMSO controls	5.55284	Chemical	siomycin A	GSE36531	PC-3 Cell Line [prostate cancer]
Lung cancer A549 cell line + Nilotinib 30000nM for 20hr _vs_ control	5.5376	Chemical	Nilotinib	E-TABM-585	A549 Cell Line
MCF10A breast cell line + 15uM sulforaphane 24hr _vs_ vehicle control	5.5376	Chemical	sulforafan	GSE28813	MCF 10A Cell Line
Subcutaneous adipose biopsies of healthy subjects treated with 3ng/kg LPS - 24hr after _vs_ before	5.5376	Chemical	Lipopolysaccharides	GSE39117	Primary tissue - fresh or fresh frozen
Hepatocellular carcinoma Huh-7.5.1 cells + 20uM neoechinulin B for 24hr _vs_ vehicle (DMSO)	5.52288	Chemical	neoechinulin	GSE63026	Cell line
Hepatocytes of female donors treated 24hr with 4000uM ranitidine _vs_ 0uM	5.52288	Chemical	Ranitidine	TG-GATES	Primary cells - cultured
HUVEC cells treated with fenofibrate for 2hr _vs_ untreated	5.52288	Chemical	Fenofibrate	GSE15494	HUVECs
Melanoma A375 cells + luciferase G2-siRNA - treated 26hr with 5uM nutlin _vs_ 26hr DMSO	5.52288	Chemical	nutlin 3	GSE39091	A-375 Cell Line
Pre-B ALL Reh cells + 48hr 1uM Ara-C _vs_ 48hr untreated controls	5.52288	Chemical	Cytarabine	GSE36372	REH Cell Line
Detroit-562 cells + 48hr of 5uM cisplatin harvested 120hr post-treatment _vs_ untreated	5.50864	Chemical	Cisplatin	GSE20185	Detroit 562 Cell Line
Hepatocytes of female donors treated 24hr with 35uM promethazine _vs_ 0uM	5.50864	Chemical	Promethazine	TG-GATES	Primary cells - cultured
Hepatocytes of female donors treated 8hr with 40uM hydroxyzine _vs_ 0uM	5.50864	Chemical	Hydroxyzine	TG-GATES	Primary cells - cultured
HL60 cells + Prestwick-685, 10.6uM _vs_ DMSO vehicle	5.50864	Chemical	Prestwick-685	GSE5258	HL-60 Cell Line
HPB-ALL leukemia cell line + 20uM SAHM1 24hr _vs_ vehicle control	5.50864	Chemical	SAHM1	GSE18198	Cell line
MM.1S multiple myeloma cells - 5000nM JQ1 6hr _vs_ untreated	5.50864	Chemical	JQ1	GSE44929	MM.1S Cell Line
Osteoblasts of healthy donors + serum starvation then 2hr of 100nM dexamethasone _vs_ vehicle	5.50864	Chemical	Dexamethasone	GSE21728	Primary cells - cultured
PC3 cells + butoconazole, 8.4uM _vs_ DMSO vehicle	5.50864	Chemical	butoconazole	GSE5258	PC-3 Cell Line [prostate cancer]
TK6 spherocytic spleen cells 80uM methyl methanesulfonate treated 24hr _vs_ untreated	5.50864	Chemical	Methyl Methanesulfonate	GSE41296	TK6 Cell Line
Melanoma cells + 24hr 1uM GSK2118436 _vs_ DMSO controls	5.49485	Chemical	dabrafenib	GSE35230	A-375 Cell Line
Subcutaneous adipose biopsies of healthy subjects treated with 3ng/kg LPS - 12hr after _vs_ before	5.49485	Chemical	Lipopolysaccharides	GSE39117	Primary tissue - fresh or fresh frozen
Calu-6 lung carcinoma cells exposed to 0.001 puffs/mL tobacco smoke condensate _vs_ unexposed	5.48149	Chemical	tobacco tar	GSE13309	Calu-6 Cell Line
Fibrosarcoma HT1080 cells - 60uM quercetin treated for 24hr _vs_ DMSO control	5.48149	Chemical	Quercetin	GSE59368	HT 1080 Cell Line
HeLa cervical cancer cells + 15nM bafilomycin for 24hr _vs_ DMSO control 24hr	5.48149	Chemical	bafilomycin A	GSE16870	HeLa Cell Line
MCF7 breast cancer cytosolic RNA - 1uM PP242 treated 12hr _vs_ vehicle control	5.48149	Chemical	PP242	GSE36847	MCF7 Cell Line
Hepatocytes of female donors treated 24hr with 800uM propylthiouracil _vs_ 0uM	5.46852	Chemical	Propylthiouracil	TG-GATES	Primary cells - cultured
Multiple myeloma INA-6 cells treated with SB-590885 _vs_ DMSO controls	5.46852	Chemical	SB-590885	GSE75078	INA-6 Cell Line
Nalm27 line treated with L-asp for 12 hr _vs_ pretreatment	5.46852	Chemical	Asparagine	GSE4397	Cell line
Placental BeWo cells treated 24hr with 500uM palmitic acid _vs_ vehicle controls	5.46852	Chemical	Palmitic Acid	GSE43685	BeWo Cell Line
SAEC-hTERT treated 6mo - crocidolite asbestos _vs_ saline	5.46852	Chemical	Asbestos, Crocidolite	GSE41178	Primary cells
SH-SY5Y cells transfected with MeCP2 decoy + 16 nM PMA _vs_ undifferentiated (no PMA)	5.46852	Chemical	phorbolol myristate acetate	GSE4600	SH-SY5Y Cell Line
Acute lymphoblastic leukemia NALM-6 xenografts - residual cells after 2d Ara-C treatment _vs_ 0d	5.45593	Chemical	Ara-C	GSE56273	Xenograft
MCF7 cells treated with doxorubicin _vs_ untreated	5.45593	Chemical	doxorubicin	GSE13477	MCF7 Cell Line
PC3 prostate cancer cells hypoxic (0.2% O2) condition - NO sulindac (25uM) _vs_ DMSO control	5.45593	Chemical	NCX 1102	GSE34112	PC-3 Cell Line [prostate cancer]
Fibroblasts of normal cardiac ventricles treated 24hr with 200nM halofuginone _vs_ saline controls	5.4437	Chemical	halofuginone	GSE95059	Primary cells - cultured
HL60 cells + estradiol, 14.6uM _vs_ DMSO vehicle	5.4437	Chemical	Estradiol	GSE5258	HL-60 Cell Line
MCF7 cells + wortmannin, 1uM _vs_ DMSO vehicle	5.4437	Chemical	wortmannin	GSE5258	MCF7 Cell Line
Adult T-cell leukemia interleukin-2 indepndent cell line TaY-E10 + 150nM 17DMAG 24hr _vs_ untreated	5.4318	Chemical	17DMAG	GSE12287	Cell line
Breast cancer HCC-1500 cells + 10X IC50 concentration of eribulin for 24hr _vs_ untreated	5.4318	Chemical	eribulin	GSE50832	HCC1500 Cell Line
HeLa cells + DAC + trichostatin A _vs_ untreated	5.4318	Chemical	Trichostatin A	GSE2097	HeLa Cell Line
Hepatocytes of female donors treated 8hr with 800uM propylthiouracil _vs_ 0uM	5.4318	Chemical	Propylthiouracil	TG-GATES	Primary cells - cultured
MCF7 cells + felodipine, 10.4uM _vs_ DMSO vehicle	5.4318	Chemical	Felodipine	GSE5258	MCF7 Cell Line
PC3 cells + cicloheximide, 14.2uM _vs_ DMSO vehicle	5.4318	Chemical	Cycloheximide	GSE5258	PC-3 Cell Line [prostate cancer]
PC3 cells + halcinonide, 8.8uM _vs_ DMSO vehicle	5.4318	Chemical	Halcinonide	GSE5258	PC-3 Cell Line [prostate cancer]
Breast cancer MDA-MB-231 cells with FOXM1 siRNA + 36hr 5uM doxorubicin _vs_ untreated controls	5.42022	Chemical	Doxorubicin	GSE25741	MDA-MB-231 Cell Line
Hepatocytes of female donors treated 24hr with 50uM nitrofurazone _vs_ 0uM	5.42022	Chemical	Nitrofurazone	TG-GATES	Primary cells - cultured
Hepatocytes of female donors treated 8hr with 72.8uM azathioprine _vs_ 0uM	5.42022	Chemical	Azathioprine	TG-GATES	Primary cells - cultured
Trabecular meshwork treated with 1mg per ml Triamcinolone acetonide _vs_ benzyl alcohol treated	5.42022	Chemical	Triamcinolone acetonide	GSE6298	Primary cells - cultured
HL60 cells + equilin, 15uM _vs_ DMSO vehicle	5.40894	Chemical	Equilin	GSE5258	HL-60 Cell Line
HL-60 promyelocytic leukemia cells treated 5d with 10nM phorbol 12-myristate 13-acetate _vs_ vehicle	5.40894	Chemical	pma	GSE982	HL-60 Cell Line
MCF7 cells + chlorpromazine, 11.2uM _vs_ DMSO vehicle	5.39794	Chemical	Chlorpromazine	GSE5258	MCF7 Cell Line
Melanoma cell line A375 650nM MLN4924 treated 24hr _vs_ DMSO control	5.39794	Chemical	MLN4924	GSE30531	A-375 Cell Line
Hepatocytes of female donors treated 24hr with 72.8uM azathioprine _vs_ 0uM	5.38722	Chemical	Azathioprine	TG-GATES	Primary cells - cultured
HMEC + ox-PAPC 40mcg _vs_ control HMEC	5.38722	Chemical	Phosphorylcholine	GSE6584	HMECs
Ishikawa cells + 1nM 17-alpha-estradiol 48hr _vs_ vehicle control	5.38722	Chemical	17a-estradiol	GSE11869	Ishikawa Cell Line
Melanoma cell line A375 650nM MLN4924 treated 2hr _vs_ DMSO control	5.38722	Chemical	MLN4924	GSE30531	A-375 Cell Line
T-cell acute lymphoblastic leukemia CCRF-CEM-C7H2 cells dexamethasone treated 24hr _vs_ ethanol	5.37675	Chemical	Dexamethasone	GSE11336	CCRF-CEM Cell Line
HL60 cells + alpha-ergocryptine, 7uM _vs_ DMSO vehicle	5.36653	Chemical	ergocryptine	GSE5258	HL-60 Cell Line
MCF7 cells + tyrphostin AG-1478, 31.6uM _vs_ DMSO vehicle	5.36653	Chemical	tyrphostin AG 1478	GSE5258	MCF7 Cell Line
Breast carcinoma SUM cells + 3hr 500nM JQ1 _vs_ DMSO_GPL11154	5.34679	Chemical	JQ1	GSE63582	SUM159PT Cell Line
NUT midline carcinoma cell line TC-797 with BRD4-NUT fusion + 24hr 25nM trichostatin A _vs_ vehicle	5.34679	Chemical	trichostatin A	GSE18668	Cell line
Hep G2 hepatocellular carcinoma cell line + 500uM ciprofloxacin for 24hr _vs_ control	5.33724	Chemical	Ciprofloxacin	GSE9166	Hep G2 Cell Line
Human epidermal keratinocytes + 48hr of 5uM cisplatin harvested 24hr post-treatment _vs_ untreated	5.33724	Chemical	Cisplatin	GSE20185	Primary cells - cultured
Hepatocytes of female donors treated 8hr with 300uM mexiletine _vs_ 0uM	5.3279	Chemical	Mexiletine	TG-GATES	Primary cells - cultured
Myotubes of abdominal muscle treated 24hr with 100uM eicosapentaenoic acid _vs_ BSA control	5.3279	Chemical	Eicosapentaenoic Acid	GSE18589	Primary cells - cultured
MCF7 cells + dyclonine, 12.2uM _vs_ DMSO vehicle	5.31876	Chemical	dyclonine	GSE5258	MCF7 Cell Line
MCF7 cells + tribenoside, 8.4uM _vs_ DMSO vehicle	5.31876	Chemical	tribenoside	GSE5258	MCF7 Cell Line
Laryngeal squamous cell carcinoma SQ-20B cells treated 48hr with 5uM erlotinib _vs_ DMSO control	5.3098	Chemical	erlotinib	GSE45891	SQ-20B Cell Line
Lung carcinoma A549 cells + 2uM sodium arsenite (NaAsO2) for 1wk _vs_ untreated	5.3098	Chemical	sodium arsenite	GSE44169	A549 Cell Line
Pancreatic ductal adenocarcinoma BxPc3 cells 5hr with 1.6uM CPI203 _vs_ untreated controls	5.3098	Chemical	CPI203	GSE55209	BxPC-3 Cell Line
Aortic endothelial cells (HAECs) treated with 3-oxo-dodecynoyl-homoserine lactone _vs_ vehicle	5.29243	Chemical	Acyl-Butyrolactones	GSE26295	Primary cells - cultured
Blast cells from acute myeloblastic leukemia patients - 1mM ATP treated 24hr _vs_ untreated	5.29243	Chemical	Adenosine Triphosphate	GSE30903	Primary cells
Hepatocellular carcinoma hepatocyte HepaRG cells + 6hr 100uM Flutamide _vs_ DMSO	5.29243	Chemical	Flutamide	GSE69851	HepaRG Cell Line
HL60 cells + dicycloverine, 11.6uM _vs_ DMSO vehicle	5.29243	Chemical	Dicyclomine	GSE5258	HL-60 Cell Line
HL60 cells + mephentermine, 9.4uM _vs_ DMSO vehicle	5.29243	Chemical	Mephentermine	GSE5258	HL-60 Cell Line
KMH2 cell line + 5-aza-dC 5uM 5d _vs_ untreated	5.29243	Chemical	5-azacytidine	GSE8388	Cell line
A549 lung epithelial cells + 30min 10uM SIS3 inhibitor _vs_ DMSO vehicle controls	5.284	Chemical	6,7-dimethyl-2-(2E)-3-(1-methyl-2-phenyl-1H-pyrrolo(2,3-b)pyridin-3-yl-prop-2-enoyl)-1,2,3,4-tetrahydroisoquinoline hydrochloride	GSE26858	A549 Cell Line
HL60 cells + resveratrol, 17.6uM _vs_ DMSO vehicle	5.284	Chemical	resveratrol	GSE5258	HL-60 Cell Line
Melanoma A375 cells treated with 25uM A771726 for 48hr _vs_ 0hr	5.284	Chemical	A 771726	GSE68039	A-375 Cell Line
Gastric cancer AGS cell line 0.01% ornithogalum treated for 36hr _vs_ ethanol control	5.26761	Chemical	Ornithogalum glycoside	GSE54658	AGS Cell Line
MCF7 cells + syrosingopine, 6uM _vs_ DMSO vehicle	5.26761	Chemical	syrosingopine	GSE5258	MCF7 Cell Line
Melanoma A375 cells + BRCA1-siRNA - treated 26hr with 1650nM MLN4924 _vs_ 26hr DMSO	5.26761	Chemical	MLN4924	GSE39091	A-375 Cell Line
Nasal epithelial cells incubated 24hr with 200uM formaldehyde _vs_ 24hr untreated	5.26761	Chemical	formalin	GSE21477	Primary cells - cultured
PBMCs of healthy donors treated 24hr with GAS _vs_ untreated controls	5.25181	Chemical	GAS	GSE74235	Blood fraction
HL60 cells + clonidine, 15uM _vs_ DMSO vehicle	5.24413	Chemical	Clonidine	GSE5258	HL-60 Cell Line
MCF7 cells + abamectin, 4.8uM _vs_ DMSO vehicle	5.24413	Chemical	abamectin	GSE5258	MCF7 Cell Line
A549 lung adenocarcinoma cells in media without serine + 1uM compound 16 1.5hr _vs_ DMSO	5.23657	Chemical	compound 16	GSE40191	A549 Cell Line
HepG2 hepatocellular carcinoma cell line 500uM EuG treated for 24hr _vs_ DMSO control	5.23657	Chemical	Eugenol	GSE28878	Hep G2 Cell Line
PC3 cells + fluphenazine, 10uM _vs_ DMSO vehicle	5.23657	Chemical	Fluphenazine	GSE5258	PC-3 Cell Line [prostate cancer]
Endometrial adenocarcinoma Ishikawa cells with ESR1 H1 - 10nM estradiol for 4hr _vs_ DMSO	5.22915	Chemical	Estradiol	GSE56946	Ishikawa Cell Line
MCF7 cells + miconazole, 9.6uM _vs_ DMSO vehicle	5.22915	Chemical	Miconazole	GSE5258	MCF7 Cell Line
PC3 cells + triamcinolone, 10.2uM _vs_ DMSO vehicle	5.22185	Chemical	tetrahydrotriamcinolone	GSE5258	PC-3 Cell Line [prostate cancer]
THP-1 cell line infected with B. pseudomallei and Daboiatoxin treated _vs_ uninfected untreated	5.22185	Chemical	daboiatoxin	GSE7577	THP-1 Cell Line
Acute myeloid leukemia MOLM-14 cells + 4uM R406 for 24hr _vs_ vehicle (DMSO)	5.21467	Chemical	R 406 cpd	GSE46302	MOLM-14 Cell Line
Prostate carcinoma PC-3 cells treated 24hr with 200uM icilin _vs_ 0.1% ethanol vehicle controls	5.21467	Chemical	icilin	GSE45567	PC-3 Cell Line [prostate cancer]
MCF7 breast cancer cells treated 24hr with1uM MG132 _vs_ vehicle	5.20761	Chemical	MG132	GSE8383	MCF7 Cell Line
Pancreatic islet cells treated 1hr with forskolin _vs_ untreated_GPL571	5.20761	Chemical	Forskolin	GSE2060	293T Cell Line
Prostate cancer androgen-independent PC3 cells + 15uM sulforaphane for 24hr _vs_ vehicle (DMSO)	5.20761	Chemical	sulforafan	GSE48812	PC-3 Cell Line [prostate cancer]
U266 myeloma cells p53 mutant + 40uM PRIMA -1Met 8hr _vs_ DMSO control	5.20761	Chemical	2-hydroxymethyl-2-methoxymethylazabicyclo(2.2.2)octan-3-one	GSE46609	U-266B1 Cell Line
Hepatocytes of female donors treated 8hr with 1200uM iproniazid _vs_ 0uM	5.20066	Chemical	Iproniazid	TG-GATES	Primary cells - cultured
Hepatocellular carcinoma HepG2 cells + 106.25uM nifedipine for 24hr _vs_ vehicle (DMSO)	5.19382	Chemical	Nifedipine	GSE51952	Hep G2 Cell Line
MCF7 cells + clotrimazole, 50uM _vs_ DMSO vehicle	5.19382	Chemical	Clotrimazole	GSE5258	MCF7 Cell Line
MCF7 cells + mestranol, 12.8uM _vs_ DMSO vehicle	5.19382	Chemical	Mestranol	GSE5258	MCF7 Cell Line
Prostate carcinoma VCaP cells treated 24hr with 10uM GSK525762A _vs_ DMSO vehicle	5.19382	Chemical	GSK525762A	GSE56352	VCaP Cell Line
Lung cancer A549 cells untransfected + 24hr 100nM dexamethasone _vs_ untransfected + untreated	5.18709	Chemical	Dexamethasone	GSE35962	A549 Cell Line
NSCLC NCI-H1299 T18 cells treated for 24hr - 1uM GSK-J4 _vs_ DMSO controls	5.18709	Chemical	GSK-J4	GSE81687	NCI-H1299 Cell Line
Colon cancer HCT116 cells - methionine deficient culture 24hr _vs_ cultured with methionine	5.18046	Chemical	Methionine	GSE72131	HCT 116 Cell Line
Fibrosarcoma HT1080 cells - 1uM etoposide treated for 24hr _vs_ DMSO control	5.18046	Chemical	Etoposide	GSE59368	HT 1080 Cell Line
Breast adenocarcinoma CAMA1 cells 1uM MK2206 treated 12hr _vs_ DMSO	5.17393	Chemical	MK2206	GSE64033	CAMA-1 Cell Line
Embryonic kidney SCL60 cells (overexpressing GnRH-R) + 8hr 100nM triptorelin _vs_ vehicle	5.17393	Chemical	Triptorelin Pamoate	GSE27467	293 Cell Line
Hep G2 hepatocarcinoma cell line cultured for 12hr with 10nM TCDD _vs_ 0.5% DMSO	5.16749	Chemical	Tetrachlorodibenzodioxin	E-MEXP-2574	Hep G2 Cell Line
Skin keratinocyte HaCaT cells treated 4hr with 100uM obacunone _vs_ DMSO vehicle control	5.16749	Chemical	obacunone	GSE57120	HaCaT Cell Line
Diffuse_large B cell lymphoma OCI-LY3 cells + 0.812uM etoposide for 24hr _vs_ untreated	5.16115	Chemical	etoposide	GSE51068	OCI-LY-3 Cell Line
HET-1A esophageal cell line treated for 24hr with 300uM deoxycholic acid _vs_ untreated	5.16115	Chemical	Deoxycholic Acid	GSE13400	Het-1A Cell Line
HL60 cells + pregnenolone, 12.6uM _vs_ DMSO vehicle	5.16115	Chemical	Pregnenolone	GSE5258	HL-60 Cell Line
Hepatocellular carcinoma HEPG2 cells - 10uM genistein treated for 18hr _vs_ DMSO	5.1549	Chemical	Genistein	GSE40069	Hep G2 Cell Line
Hepatocytes of female donors treated 24hr with 40uM benziodarone _vs_ 0uM	5.14874	Chemical	benziodarone	TG-GATES	Primary cells - cultured
HL60 cells + zardaverine, 15uM _vs_ DMSO vehicle	5.14874	Chemical	zardaverine	GSE5258	HL-60 Cell Line
PC3 cells + fluticasone, 8uM _vs_ DMSO vehicle	5.14267	Chemical	fluticasone	GSE5258	PC-3 Cell Line [prostate cancer]
Ramos B lymphoma cells treated 4hr with 50uM zinc acetate _vs_ mannitol control	5.14267	Chemical	zinc acetate	GSE2964	RAMOS Cell Line
Breast cancer MCF7 cells - histidine deprived media treated 24hr _vs_ control media	5.13668	Chemical	Histidine	GSE62673	MCF7 Cell Line
NSCLC cancer NCI-H1299 T18 cells treated 24hr - 0.2uM JIB-04 _vs_ DMSO controls	5.13668	Chemical	JIB-04	GSE77209	NCI-H1299 Cell Line
A549 lung adenocarcinoma cells in media with serine + 1uM compound 16 24hr _vs_ DMSO	5.13077	Chemical	compound 16	GSE40191	A549 Cell Line
HL60 cells + nocodazole, 13.2uM _vs_ DMSO vehicle	5.13077	Chemical	Nocodazole	GSE5258	HL-60 Cell Line
Pharyngeal squamous cell carcinoma FaDu cells treated 48hr with 5uM erlotinib _vs_ DMSO control	5.13077	Chemical	erlotinib	GSE45891	FaDu Cell Line
TK6 spherocytic spleen cells 160uM methyl methanesulfonate treated 4hr _vs_ untreated	5.13077	Chemical	Methyl Methanesulfonate	GSE41296	TK6 Cell Line
MCF7 cells + verteporfin, 2.8uM _vs_ DMSO vehicle	5.12494	Chemical	verteporfin	GSE5258	MCF7 Cell Line
Breast cancer CAL-51 cells + 10X IC50 concentration of eribulin for 24hr _vs_ untreated	5.11919	Chemical	eribulin	GSE50832	CAL 51 Cell Line
HL60 cells + epiandrosterone, 13.8uM _vs_ DMSO vehicle	5.11919	Chemical	epiandrosterone	GSE5258	HL-60 Cell Line
Lung cancer A549 cell line + Nilotinib 30000nM for 4hr _vs_ control	5.11919	Chemical	Nilotinib	E-TABM-585	A549 Cell Line
HL60 cells + co-dergocrine mesilate, 6.4uM _vs_ DMSO vehicle	5.11351	Chemical	co-dergocrine mesilate	GSE5258	HL-60 Cell Line
HL60 cells + alclometasone, 7.6uM _vs_ DMSO vehicle	5.10237	Chemical	alclometasone dipropionate	GSE5258	HL-60 Cell Line
MCF7 cells + securinine, 18.4uM _vs_ DMSO vehicle	5.10237	Chemical	securinine	GSE5258	MCF7 Cell Line
Umbilical vein endothelial cells + 3hr with 500nM JQ1 _vs_ untreated	5.10237	Chemical	JQ1	GSE53999	Primary cells - cultured
HL60 cells + pyrvinium, 3.4uM _vs_ DMSO vehicle	5.09691	Chemical	pyrvinium	GSE5258	HL-60 Cell Line
MCF7 breast cancer cells + 4hr 25mM lactic acid-containing media _vs_ media only	5.09691	Chemical	lactic acid	GSE19123	MCF7 Cell Line
Ovarian cancer cell line CP70 cisplatin resistant - Decitabine treated 48hr _vs_untreated	5.09691	Chemical	5-azacytidine	GSE28646	A2780cis Cell Line
PC3 cells + ciclopirox, 15uM _vs_ DMSO vehicle	5.09691	Chemical	ciclopirox	GSE5258	PC-3 Cell Line [prostate cancer]
PC3 cells + isoconazole, 9.6uM _vs_ DMSO vehicle	5.09691	Chemical	isoconazole	GSE5258	PC-3 Cell Line [prostate cancer]
SUP-B15 line treated with L-asp for 8 hr _vs_ pretreatment	5.09151	Chemical	Asparagine	GSE4397	SUP-B15 Cell Line
Colorectal cancer HCT116 cells with mutant dicer - 0.5mg/mL brefeldin A treated 24hr _vs_ untreated	5.08619	Chemical	Brefeldin A	GSE63252	HCT 116 Cell Line
Monocytes from blood + 6hr 60mg/mL Engerix-B _vs_ media_GPL10558	5.08619	Chemical	Engerix-B	GSE44722	Primary cells - cultured
Monocytes from blood + 6hr 60mg/mL Havrax _vs_ media_GPL10558	5.08619	Chemical	Havrax	GSE44722	Primary cells - cultured
Ovarian cancer KURAMOCHI cells + 10X IC50 concentration of eribulin for 24hr _vs_ untreated	5.08619	Chemical	eribulin	GSE50832	KURAMOCHI Cell Line
Pediatric glioma KNS-42 cells treated 48hr with IGC-001 _vs_ DMSO	5.08619	Chemical	ICG 001	GSE83266	KNS-42 Cell Line
Monocyte derived dendritic cells + TLR4 agonist R848 8hr _vs_ untreated	5.08092	Chemical	R848	GSE2706	Primary cells
PC3 cells + mestranol, 12.8uM _vs_ DMSO vehicle	5.08092	Chemical	Mestranol	GSE5258	PC-3 Cell Line [prostate cancer]
PC3 cells + CP-690334-01, 10uM _vs_ DMSO vehicle	5.07572	Chemical	CP-690334-01	GSE5258	PC-3 Cell Line [prostate cancer]
HCT116 tetraploid colon carcinoma cells treated 36hr with cisplatin + UCN-01 _vs_ untreated	5.0655	Chemical	Cisplatin	E-TABM-172	HCT 116 Cell Line
Hepatocytes of female donors treated 8hr with 10000uM theophylline _vs_ 0uM	5.06048	Chemical	Theophylline	TG-GATES	Primary cells - cultured
Multiple myeloma RPMI8226 cells + 50uM GBZ (Guanabenz) for 24hr _vs_ untreated	5.06048	Chemical	Guanabenz	GSE60981	RPMI 8226 Cell Line
Prostate cancer LnCaP cells + 100nM T0901417 for 24hr _vs_ control	5.05061	Chemical	T0901417	GSE60956	LNCaP Cell Line
PC3 cells + raloxifene, 7.8uM _vs_ DMSO vehicle	5.04576	Chemical	Raloxifene	GSE5258	PC-3 Cell Line [prostate cancer]
HL60 cells + geldanamycin, 1uM _vs_ DMSO vehicle	5.04096	Chemical	geldanamycin	GSE5258	HL-60 Cell Line
Nalm27 line treated with L-asp for 12 hr _vs_ untreated	5.04096	Chemical	Asparagine	GSE4397	Cell line
Acute monoblastic leukemia MOLM14 cells - 25nM cortistatin A (CA) treated for 24hr _vs_ DMSO	5.03621	Chemical	cortistatin A	GSE65014	MOLM-14 Cell Line
HL60 cells + nifuroxazide, 14.6uM _vs_ DMSO vehicle	5.03621	Chemical	nifuroxazide	GSE5258	HL-60 Cell Line
Diffuse_large B cell lymphoma OCI-LY3 cells + 100uM methotrexate for 24hr _vs_ untreated	5.03152	Chemical	methotrexate	GSE51068	OCI-LY-3 Cell Line
HL60 cells + beclometasone, 7.6uM _vs_ DMSO vehicle	5.02687	Chemical	Beclomethasone	GSE5258	HL-60 Cell Line
Lymphoblastoid TK6 cells mock-irradiated - 8hr 1nM TPA-treated _vs_ 8hr DMSO	5.02687	Chemical	phorbolol myristate acetate	GSE71521	TK6 Cell Line
Mixed lineage leukemia MV-4-11 nascent RNA + 6hr 500nM I-BET151 _vs_ DMSO	5.02687	Chemical	I-BET151	GSE81147	MV-4-11 Cell Line
Promyelocytic leukemia NB4 cells with HOTAIRM1 shRNA + 0.5uM retinoic acid 96hr _vs_ untreated	5.02687	Chemical	Retinoic acid	GSE49516	NB-4 Cell Line
Adult lung type II cells culture 5d + DCI hormone treatment final 72hr _vs_ untreated	5.02228	Chemical	1-Methyl-3-isobutylxanthine	GSE19699	Primary cells - cultured
Diffuse intrinsic pontine glioma SF8628 cells treated for 48hr - 300nM JQ1 _vs_ DMSO controls	5.01773	Chemical	JQ1	GSE78801	Cell line
Hepatocellular carcinoma Hep G2 cells treated with SAHA (Vorinostat) _vs_ DMSO control	5.01773	Chemical	vorinostat	GSE52232	Hep G2 Cell Line
MCF7 breast cancer cells treated 24hr with 40mM gamma tocotrienol _vs_ DMSO	5.01773	Chemical	gamma tocotrienol	GSE21946	MCF7 Cell Line
Hepatic stellate cell myofibroblasts 48hr - 25uM ceramide-C6 _vs_ ethanol controls	5.01323	Chemical	Ceramides	GSE78853	Primary cells - cultured
Hepatocytes of male donors treated 8hr with 1000uM metformin _vs_ 0uM	5.01323	Chemical	Metformin	TG-GATES	Primary cells - cultured
HL60 cells + prochlorperazine, 10uM _vs_ DMSO vehicle	5.01323	Chemical	Prochlorperazine	GSE5258	HL-60 Cell Line
PC3 cells + danazol, 11.8uM _vs_ DMSO vehicle	5.01323	Chemical	Danazol	GSE5258	PC-3 Cell Line [prostate cancer]
Tongue squamous cell carcinoma CAL 27 cells treated 48hr with 5uM erlotinib _vs_ DMSO control	5.01323	Chemical	erlotinib	GSE45891	CAL 27 Cell Line
Burkitt lymphoma RAJI cells treated 24hr with 500nM JQ1 _vs_ DMSO controls	5	Chemical	JQ1	GSE92456	RAJI Cell Line
ETP-ALL Loucy cells (GATA3 high) treated 48hr with 5uM decitabine _vs_ untreated	5	Chemical	decitabine	GSE78166	Loucy Cell Line
HepG2 hepatocellular carcinoma cell line 2mM Resorcinol treated for 12hr _vs_ EtOH control	5	Chemical	resorcinol	GSE28878	Hep G2 Cell Line
MCF7 breast cancer cells treated with bortezomib for 24hr _vs_ untreated	5	Chemical	bortezomib	GSE8565	MCF7 Cell Line
MCF7 cells + digoxin, 5.2uM _vs_ DMSO vehicle	5	Chemical	Digoxin	GSE5258	MCF7 Cell Line
Monocytes treated 10min with control antibody - 10ng/ml LPS _vs_ no LPS	5	Chemical	LPS	GSE94969	Primary cells - cultured
CML bone marrow of BCR-ABL+ patients after 4wk 400mg/d imatinib mesylate _vs_ before treatment	4.95861	Chemical	imatinib	GSE33075	Primary tissue - fresh or fresh frozen
Dermal fibroblasts (NHDF) - 3uM sphingosine-1-phosphate treated 8hr _vs_ untreated_GPL6480	4.95861	Chemical	sphingosine 1-phosphate	GSE56308	Primary cells - cultured
Diffuse large B-cell lymphoma OCI-Ly4 cells + 500nM JQ1 for 48hr _vs_ vehicle (DMSO)	4.95861	Chemical	JQ1	GSE45630	Cell line
Embryonic H9 stem cell line - 0.33mM carbamazepine treated 1d _vs_ DMSO	4.95861	Chemical	Carbamazepine	GSE64123	H9 Stem Cell Line
Fibroblast IMR90 cells vector 5d - 100nM etoposide 48hr acute DNA damage response _vs_ growing	4.95861	Chemical	etoposide	GSE53379	IMR-90 Cell Line
Hepatocytes of female donors treated 8hr with 50uM quinidine _vs_ 0uM	4.95861	Chemical	Quinidine	TG-GATES	Primary cells - cultured
HepG2 hepatocellular carcinoma cell line 10nM TCDD treated for 12hr _vs_ DMSO control	4.95861	Chemical	Tetrachlorodibenzodioxin	GSE28878	Hep G2 Cell Line
HepG2 hepatocellular carcinoma cell line 30uM E2 treated for 12hr _vs_ DMSO control	4.95861	Chemical	Estradiol	GSE28878	Hep G2 Cell Line
Jurkat T-cells 6hr post 300uM Mono-2-ethylhexyl phthalate treatment _vs_ untreated	4.95861	Chemical	mono-n-hexyl phthalate	GSE46909	Jurkat Cell Line
MCF7 cells + isoconazole, 9.6uM _vs_ DMSO vehicle	4.95861	Chemical	isoconazole	GSE5258	MCF7 Cell Line
MCF7 cells + quinisocaine, 13uM _vs_ DMSO vehicle	4.95861	Chemical	quinisocaine	GSE5258	MCF7 Cell Line
PC3 cells + fludroxycortide, 9.2uM _vs_ DMSO vehicle	4.95861	Chemical	Flurandrenolone	GSE5258	PC-3 Cell Line [prostate cancer]
PC3 cells + isoflupredone, 9.6uM _vs_ DMSO vehicle	4.95861	Chemical	9-fluoroprednisolone	GSE5258	PC-3 Cell Line [prostate cancer]
Bronchial epithelial AIR-100 cells 4hr post 7min 15% cigarette smoke exposure _vs_ synthetic air	4.92082	Chemical	Tobacco smoke	E-MTAB-874	Primary cells - cultured
Colorectal carcinoma HCT 116 cells treated for 8hr with 250nM daunorubicin _vs_ vehicle	4.92082	Chemical	Daunorubicin	GSE86190	HCT 116 Cell Line
Duodenum mucosal cells of healthy donors perfused 4hr with 0.055M glutamine _vs_ untreated	4.92082	Chemical	Glutamine	E-MEXP-941	Primary tissue - fresh or fresh frozen
Hepatocellular carcinoma hepatocyte HepaRG cells + 6hr 100uM 1-napthylisothiocycanate _vs_ DMSO	4.92082	Chemical	1-napthylisothiocycanate	GSE69851	HepaRG Cell Line
Hepatocytes of female donors treated 24hr with 5000uM sulpiride _vs_ 0uM	4.92082	Chemical	Sulpiride	TG-GATES	Primary cells - cultured
Hepatocytes of female donors treated 8hr with 120uM lomustine _vs_ 0uM	4.92082	Chemical	Lomustine	TG-GATES	Primary cells - cultured
HL60 cells + dihydroergocristine, 5.6uM _vs_ DMSO vehicle	4.92082	Chemical	Dihydroergocristine	GSE5258	HL-60 Cell Line
MCF-7 cells + 100nM Fulvestrant 48hr _vs_ vehicle treated	4.92082	Chemical	fulvestrant	GSE14986	MCF7 Cell Line
MCF7 cells + isotretinoin, 13.4uM _vs_ DMSO vehicle	4.92082	Chemical	Isotretinoin	GSE5258	MCF7 Cell Line
Ovarian cancer OV56 cells + 10X IC50 concentration of eribulin for 24hr _vs_ untreated	4.92082	Chemical	eribulin	GSE50832	OV56 Cell Line
PC3 cells + pimozide, 8.6uM _vs_ DMSO vehicle	4.92082	Chemical	Pimozide	GSE5258	PC-3 Cell Line [prostate cancer]
Prostate cancer LNaP cells (AR+ ETV1-fusion+) - 500nM JQ1 24hr _vs_ untreated	4.92082	Chemical	JQ1	GSE55063	LNCaP Cell Line
Bone osteosarcoma SJSA-1 cells treated 12hr with 375uM 5-FU _vs_ DMSO control	4.88606	Chemical	Fluorouracil	GSE89807	SJSA-1 Cell Line
Colorectal cancer HCT116 cells TAF3 siRNA 48hr - 0.5uM doxorubicin treated 24hr _vs_ untreated	4.88606	Chemical	Doxorubicin	GSE43541	HCT 116 Cell Line
Colorectal cancer LoVo cell line - 10mM metformin treated 24hr _vs_ untreated	4.88606	Chemical	Metformin	GSE67342	LoVo Cell Line
Diffuse large B-cell lymphoma Toledo cells + 500nM JQ1 for 6hr _vs_ vehicle (DMSO)	4.88606	Chemical	JQ1	GSE45630	Toledo Cell Line
Endometrial cancer HEC-59 cells + 10X IC50 concentration of eribulin for 24hr _vs_ untreated	4.88606	Chemical	eribulin	GSE50832	HEC-59 Cell Line
HCT116 TP53 KO colon cancer cells + hydroxyurea 12hr _vs_ untreated KO	4.88606	Chemical	Hydroxyurea	GSE3176	HCT 116 Cell Line
Hepatocellular carcinoma Hep G2 cells treated 24hr - 2uM benzo(a)pyrene _vs_ DMSO control	4.88606	Chemical	Benzo(a)pyrene	GSE36242	Hep G2 Cell Line
HL60 cells + parthenolide, 16.2uM _vs_ DMSO vehicle	4.88606	Chemical	parthenolide	GSE5258	HL-60 Cell Line
HL60 cells + tetryzoline, 16.8uM _vs_ DMSO vehicle	4.88606	Chemical	tetrahydrozoline	GSE5258	HL-60 Cell Line
Jurkat cells + 0.2mg-l AgNPs 24hr _vs_ untreated	4.88606	Chemical	Silver	GSE20692	Jurkat Clone E6-1 Cell Line
K562 cells treated with PMA for 3hr _vs_ untreated	4.88606	Chemical	phorbolol myristate acetate	GSE12736	K-562 Cell Line
MCF7 cells + antimycin A, 7.2uM _vs_ DMSO vehicle	4.88606	Chemical	Antimycin A	GSE5258	MCF7 Cell Line
MCF7 cells + lasalocid, 6.6uM _vs_ DMSO vehicle	4.88606	Chemical	Lasalocid	GSE5258	MCF7 Cell Line
MCF7 cells + sulconazole, 8.6uM _vs_ DMSO vehicle	4.88606	Chemical	sulconazole	GSE5258	MCF7 Cell Line
N/Tert-1 foreskin keratinocytes expressing HPV 6bE6 + 2ug/ml mitomycin C 18hr _vs_ H2O ctrl	4.88606	Chemical	Mitomycin	GSE50568	Cell line
PC3 cells + bisacodyl, 11uM _vs_ DMSO vehicle	4.88606	Chemical	Bisacodyl	GSE5258	PC-3 Cell Line [prostate cancer]
Peripheral blood mononuclear cells of lupus patients - 1uM pioglitazone 6hr treatment _vs_ untreated	4.88606	Chemical	pioglitazone	GSE45923	Primary cells - cultured
A2780 ovarian cancer cells (wildtype p53) treated 24hr with Danusertib _vs_ untreated	4.85387	Chemical	danuseritb	GSE24547	A2780 Cell Line
Breast cancer MCF7 cells - valine deprived media treated 24hr _vs_ control media	4.85387	Chemical	valine deprived media	GSE62673	MCF7 Cell Line
Colorectal cancer HCT116 cells with mutant dicer - 2mg/mL tunicamycin treated 24hr _vs_ untreated	4.85387	Chemical	Tunicamycin	GSE63252	HCT 116 Cell Line
Diffuse large B cell lymphoma DHL6 cells treated 2hr with 1uM R406 _vs_ 0hr DMSO controls	4.85387	Chemical	R 406 cpd	GSE34176	SU-DHL-6 Cell Line
H69 small cell lung cancer cells - 100nM PIK75 treated 24hr _vs_ DMSO control	4.85387	Chemical	PIK 75	GSE40564	Primary cells - cultured
HL60 cells + betulinic acid, 8.8uM _vs_ DMSO vehicle	4.85387	Chemical	betulinic acid	GSE5258	HL-60 Cell Line
HL60 cells + dipyridamole, 8uM _vs_ DMSO vehicle	4.85387	Chemical	Dipyridamole	GSE5258	HL-60 Cell Line
MCF7 cells + protriptyline, 13.4uM _vs_ DMSO vehicle	4.85387	Chemical	Protriptyline	GSE5258	MCF7 Cell Line
MCF7 cells + S-propranolol, 13.6uM _vs_ DMSO vehicle	4.85387	Chemical	S-propranolol	GSE5258	MCF7 Cell Line
Cardiomyocytes on day 14 during differentiation - 1mM dimethyloxalyglycine for 18hr _vs_ vehicle	4.82391	Chemical	dimethyloxalylglycine	GSE71560	Primary cells - cultured
Dermal fibroblasts wildtype control + 1uM retinoic acid 48hr _vs_ untreated	4.82391	Chemical	Retinoic acid	GSE27200	Primary cells - cultured
Diffuse intrinsic pontine glioma SF8628 cells treated for 6hr - 300nM JQ1 _vs_ DMSO controls	4.82391	Chemical	JQ1	GSE78801	Cell line
Fibrosarcoma HT1080 cells - 0.3uM etoposide treated for 24hr _vs_ DMSO control	4.82391	Chemical	Etoposide	GSE59368	HT 1080 Cell Line
Hepatocytes of female donors treated 8hr with 4000uM colchicine _vs_ 0uM	4.82391	Chemical	Colchicine	TG-GATES	Primary cells - cultured
PC3 cells + clobetasol, 8.6uM _vs_ DMSO vehicle	4.82391	Chemical	Clobetasol	GSE5258	PC-3 Cell Line [prostate cancer]
ALL lines treated with L-asp for 24hr _vs_ untreated	4.79588	Chemical	Asparagine	GSE4397	Cell line
Breast cancer MCF7 cells - lysine deprived media treated 24hr _vs_ control media	4.79588	Chemical	lysine deprived media	GSE62673	MCF7 Cell Line
Embryonic stem WA09 cells treated 48hr with 60mM KCl _vs_ mock controls	4.79588	Chemical	Potassium Chloride	GSE90826	H9 Stem Cell Line
HepG2 hepatocellular carcinoma cell line 800uM EthylB treated for 12hr _vs_ DMSO control	4.79588	Chemical	ethylbenzene	GSE28878	Hep G2 Cell Line
HL60 cells + fludrocortisone, 9.4uM _vs_ DMSO vehicle	4.79588	Chemical	Fludrocortisone	GSE5258	HL-60 Cell Line
MCF7 cells + penbutolol, 5.8uM _vs_ DMSO vehicle	4.79588	Chemical	penbutolol	GSE5258	MCF7 Cell Line
PBMCs TCR activated with anti-CD3/CD28 for 24hr after 30min 1uM CsA _vs_ TCR activation only	4.79588	Chemical	Cyclosporine	GSE43210	Blood fraction
Breast carcinoma SUM cells + 12hr 500nM JQ1 _vs_ DMSO_GPL11154	4.76955	Chemical	JQ1	GSE63582	SUM159PT Cell Line
Diffuse large B-cell lymphoma Karpas422 cells + 6d 5uM EZH2-inhibitor EI1 _vs_ 6d DMSO controls	4.76955	Chemical	EI1	GSE41315	KARPAS-422 Cell Line
Hepatocytes of female donors treated 24hr with 20uM chlorpromazine _vs_ 0uM	4.76955	Chemical	Chlorpromazine	TG-GATES	Primary cells - cultured
HL60 cells + budesonide, 9.2uM _vs_ DMSO vehicle	4.76955	Chemical	Budesonide	GSE5258	HL-60 Cell Line
Human T47D breast cancer cells treated with 1mM GDC-0941 for 6hr _vs_ untreated	4.76955	Chemical	2-(1H-indazol-4-yl)-6-(4-methanesulfonylpiperazin-1-ylmethyl)-4-morpholin-4-ylthieno(3,2-d)pyrimidine	GSE20719	T-47D Cell Line
LP9 mesothelial cells exposed 8hr to 5ug/cm2 nonfibrous talc _vs_ untreated	4.76955	Chemical	Talc	GSE14034	Meso LP9 Cell Line
Lymphoblastoid TK6 cells 10Jm2 UVC-irradiated - 8hr 0.5nM TPA-treated _vs_ 8hr DMSO	4.76955	Chemical	pma	GSE71521	TK6 Cell Line
Myometrial cells from uterine smooth muscles treated 48hr with 100uM forskolin _vs_ DMSO control	4.76955	Chemical	Forskolin	GSE75799	Primary cells - cultured
Osteosarcoma U-2 OS cells grown 24hr without glutamine _vs_ with glutamine	4.76955	Chemical	Glutamine	GSE59931	U-2 OS Cell Line
PC3 cells + felodipine, 10.4uM _vs_ DMSO vehicle	4.76955	Chemical	Felodipine	GSE5258	PC-3 Cell Line [prostate cancer]
Breast cancer MCF7 cells - methionine deprived media treated 24hr _vs_ control media	4.74473	Chemical	methionine deprived media	GSE62673	MCF7 Cell Line
Colorectal cancer DKO1 cells DNMT1 DNMT3B mutant + 1uM SAHA 24hr _vs_ untreated	4.74473	Chemical	vorinostat	GSE43852	DKO-1 Cell Line
Diffuse large B-cell lymphoma Karpas422 cells + 5uM EZH2-inhibitor EI1 for 6d _vs_ 1d	4.74473	Chemical	EI1	GSE41315	KARPAS-422 Cell Line
Diffuse_large B cell lymphoma OCI-LY3 cells + 0.5uM cycloheximide for 12hr _vs_ untreated	4.74473	Chemical	cycloheximide	GSE51068	OCI-LY-3 Cell Line
Embryonic H9 stem cell line - 0.33mM carbamazepine treated 7d _vs_ DMSO	4.74473	Chemical	Carbamazepine	GSE64123	H9 Stem Cell Line
HCT116 cell line treated with oxaliplatin 12hr _vs_ untreated	4.74473	Chemical	Oxaliplatin	E-MEXP-390	HCT 116 Cell Line
HL60 cells + LY-294002, 10uM _vs_ DMSO vehicle	4.74473	Chemical	LY 294002	GSE5258	HL-60 Cell Line
MCF7 cells + clemastine, 8.6uM _vs_ DMSO vehicle	4.74473	Chemical	Clemastine	GSE5258	MCF7 Cell Line
Melanoma A375 cells + CDT1-siRNA - treated 26hr with 1650nM MLN4924 _vs_ 26hr DMSO	4.74473	Chemical	MLN4924	GSE39091	A-375 Cell Line
Myeloid leukemia cell line K562 + 10uM ICL670 16hr _vs_ untreated	4.74473	Chemical	deferasirox	GSE11670	K-562 Cell Line
Normal foreskin fibroblast BJ cells + 24hr 25uM vorinostat _vs_ control (DMSO)	4.74473	Chemical	vorinostat	GSE43010	BJ Cell Line [foreskin]
PC3 cells + menadione, 23.2uM _vs_ DMSO vehicle	4.74473	Chemical	menadione	GSE5258	PC-3 Cell Line [prostate cancer]
Breast cancer cell lines pooled + 100 ug/ml emetine dihydrochloride hydrate 10hr _vs_ control	4.72125	Chemical	emetine dihydrochloride	GSE15477	T-47D Cell Line
Hepatocytes of female donors treated 24hr with 12uM papaverine _vs_ 0uM	4.72125	Chemical	Papaverine	TG-GATES	Primary cells - cultured
Hepatocytes of female donors treated 24hr with 40uM hydroxyzine _vs_ 0uM	4.72125	Chemical	Hydroxyzine	TG-GATES	Primary cells - cultured
Human epidermal keratinocytes + 48hr of 5uM cisplatin harvested 96hr post-treatment _vs_ untreated	4.72125	Chemical	Cisplatin	GSE20185	Primary cells - cultured
MCF7 cells + pyrvinium, 1.25uM _vs_ DMSO vehicle	4.72125	Chemical	pyrvinium	GSE5258	MCF7 Cell Line
Neuroepithelial progenitors from ESCs in 6d + methyl mercury (Me-Hg) _vs_ vehicle (EtOH)	4.72125	Chemical	Methylmercury Compounds	GSE71127	Primary cells - cultured
PC3 cells + flupentixol, 7.8uM _vs_ DMSO vehicle	4.72125	Chemical	Flupenthixol	GSE5258	PC-3 Cell Line [prostate cancer]
TK6 spherocytic spleen cells 100uM formaldehyde treated 4hr _vs_ untreated	4.72125	Chemical	formalin	GSE41296	TK6 Cell Line
Hepatocellular carcinoma HepaRG cells - 0.86mM Hydrazine dihydrochloride 72hr _vs_ DMSO control	4.69897	Chemical	hydrazine dihydrochloride	GSE48990	HepaRG Cell Line
MCF7 cells + fluoxetine, 11.6uM _vs_ DMSO vehicle	4.69897	Chemical	Fluoxetine	GSE5258	MCF7 Cell Line
Colon carcinoma cell line HCT116 1.5ug/ml tunicamycin _vs_ untreated controls	4.67778	Chemical	Tunicamycin	GSE41666	HCT 116 Cell Line
Fibroblast IMR90 cells TP53 shRNA 5d - 100nM etoposide 48hr acute DNA damage response _vs_ growing	4.67778	Chemical	etoposide	GSE53379	IMR-90 Cell Line
H295R adrenocortical carcinoma cells + 2-OH-BDE85 (OH-PBDE) _vs_ untreated	4.67778	Chemical	2-OH-BDE85	GSE8588	NCI-H295R Cell Line
Hepatocytes of female donors treated 8hr with 3500uM disopyramide _vs_ 0uM	4.67778	Chemical	Disopyramide	TG-GATES	Primary cells - cultured
PBMCs from multiple sclerosis patients after 3mo of Rebif _vs_ baseline	4.67778	Chemical	Rebif	GSE26104	Blood fraction
Prostate cancer PC-3 cells - 20uM methionine media treated 24hr _vs_ 200uM methionine control media	4.67778	Chemical	Methionine	GSE62673	PC-3 Cell Line [prostate cancer]
Acute monocytic leukemia THP-1 cells treated 12hr with 3uM P4N _vs_ untreated controls	4.65758	Chemical	P4N	GSE89659	THP-1 Cell Line
Bronchial epithelial AIR-100 cells 2hr post 7min 15% cigarette smoke exposure _vs_ synthetic air	4.65758	Chemical	Tobacco smoke	E-MTAB-874	Primary cells - cultured
Hep G2 hepatocarcinoma cell line cultured for 12hr with 10nM estradiol _vs_ 0.5% DMSO	4.65758	Chemical	Estradiol	E-MEXP-2574	Hep G2 Cell Line
HL60 cells + monobenzone, 20uM _vs_ DMSO vehicle	4.65758	Chemical	monobenzone	GSE5258	HL-60 Cell Line
Lung fibroblasts menadione 24hr _vs_ menadione 0hr	4.65758	Chemical	menadione	GSE4301	Lung fibroblasts
MCF7 cells + helveticoside, 7.4uM _vs_ DMSO vehicle	4.65758	Chemical	helveticoside	GSE5258	MCF7 Cell Line
Diffuse large B cell lymphoma DHL6 cells treated 24hr with 1uM R406 _vs_ 0hr DMSO controls	4.63827	Chemical	R 406 cpd	GSE34176	SU-DHL-6 Cell Line
HL60 cells + famprofazone, 10.6uM _vs_ DMSO vehicle	4.63827	Chemical	famprofazone	GSE5258	HL-60 Cell Line
Lymphoblastoid TK6 cells 10Jm2 UVC-irradiated - 24hr 1nM TPA-treated _vs_ 24hr DMSO	4.63827	Chemical	phorbolol myristate acetate	GSE71521	TK6 Cell Line
MCF7 cells + azacitidine, 16.4uM _vs_ DMSO vehicle	4.63827	Chemical	azacitidine	GSE5258	MCF7 Cell Line
Breast cancer MCF7 cells - tyrosine deprived media treated 24hr _vs_ control media	4.61979	Chemical	Tyrosine	GSE62673	MCF7 Cell Line
Hepatocyte-like cells derived from ESCs + 72hr 410uM IC10 Wy-14643 _vs_ 0.5% DMSO	4.61979	Chemical	WY 14,643	GSE40117	Primary cells - cultured
HL60 cells + etoposide, 6.8uM _vs_ DMSO vehicle	4.61979	Chemical	Etoposide	GSE5258	HL-60 Cell Line
PC3 cells + benfluorex, 10.4uM _vs_ DMSO vehicle	4.61979	Chemical	benfluorex	GSE5258	PC-3 Cell Line [prostate cancer]
Prostate carcinoma PC-3 cells treated 24hr with 0.5uM GSK525762A _vs_ DMSO vehicle	4.61979	Chemical	GSK525762A	GSE56352	PC-3 Cell Line [prostate cancer]
Diffuse large B-cell lymphoma Karpas422 cells + 5uM EZH2-inhibitor EI1 for 6d _vs_ 2d	4.60206	Chemical	EI1	GSE41315	KARPAS-422 Cell Line
HCC Hep G2 cells treated for 6hr - 12.5uM nefazodone _vs_ DMSO controls	4.60206	Chemical	nefazodone	GSE10200	Hep G2 Cell Line
Head and neck squamous cell cancer SCC-61 cells with 2ug/ml AMP18 for 24hr _vs_ 2hr	4.60206	Chemical	AMP18	GSE73330	SCC-61 Cell Line
HL60 acute myeloid leukemia cells + fresh media with 1uM decitabine every 24hr for 3d _vs_ vehicle	4.60206	Chemical	5-azacytidine	GSE24224	HL-60 Cell Line
HL60 cells + monorden, 0.1uM _vs_ DMSO vehicle	4.60206	Chemical	monorden	GSE5258	HL-60 Cell Line
Lung fibroblasts DTT 6hr _vs_ DTT 0hr	4.60206	Chemical	Dithiothreitol	GSE4301	Primary cells
MCF7 cells + digoxigenin, 10.2uM _vs_ DMSO vehicle	4.60206	Chemical	Digoxigenin	GSE5258	MCF7 Cell Line
MCF7 cells + tretinoin, 13.4uM _vs_ DMSO vehicle	4.60206	Chemical	Retinoic acid	GSE5258	MCF7 Cell Line
Monocytes treated 3hr with M. tuberculosis derived TLR2 ligand _vs_ media	4.60206	chemical	M. tuberculosis derived TLR2 ligand	GSE8921	Primary cells - cultured
PC3 cells + clomipramine, 11.4uM _vs_ DMSO vehicle	4.60206	Chemical	Clomipramine	GSE5258	PC-3 Cell Line [prostate cancer]
PC3 cells + fluocinonide, 8uM _vs_ DMSO vehicle	4.60206	Chemical	Fluocinonide	GSE5258	PC-3 Cell Line [prostate cancer]
Colorectal cancer HCT116 cells control siRNA - treated with 5mM butyrate for 3d _vs_ untreated	4.58503	Chemical	Butyrate	GSE41113	HCT 116 Cell Line
Diffuse_large B cell lymphoma OCI-LY3 cells + 0.01uM camptothecin for 12hr _vs_ untreated	4.58503	Chemical	camptothecin	GSE51068	OCI-LY-3 Cell Line
Diffuse_large B cell lymphoma OCI-LY3 cells + 0.01uM camptothecin for 24hr _vs_ untreated	4.58503	Chemical	camptothecin	GSE51068	OCI-LY-3 Cell Line
MM.1S multiple myeloma cells - 500nM JQ1 6hr _vs_ DMSO	4.58503	Chemical	JQ1	GSE44929	MM.1S Cell Line
Monocytes treated 12hr with M. tuberculosis derived TLR2 ligand _vs_ media	4.58503	chemical	M. tuberculosis derived TLR2 ligand	GSE8921	Primary cells - cultured
Uveal melanoma Mel290 cells without GNAQ or GNA11 mutations + JQ1 for 24hr _vs_ untreated	4.58503	Chemical	JQ1	GSE66048	Cell line
Acute myeloid leukemia HL-60 cells + 4uM R406 for 24hr _vs_ vehicle (DMSO)	4.56864	Chemical	R 406 cpd	GSE46302	HL-60 Cell Line
Acute promyelocytic leukemia NB-4 cells + 5mM valproic acid for 24hr _vs_ untreated_GPL96	4.56864	Chemical	Valproic Acid	GSE666	NB-4 Cell Line
Breast adenocarcinoma MDA-MB-231 cells treated for 3hr - 1000nM BETi-211 _vs_DMSO controls	4.56864	Chemical	BETi-211	GSE95375	MDA-MB-231 Cell Line
Calu-6 lung carcinoma cells exposed to 0.003 puffs/mL tobacco smoke condensate _vs_ unexposed	4.56864	Chemical	tobacco tar	GSE13309	Calu-6 Cell Line
Colorectal cancer HCT116 cells with wildtype P53 - 2mg/mL tunicamycin treated 24hr _vs_ untreated	4.56864	Chemical	Tunicamycin	GSE63252	HCT 116 Cell Line
Diffuse_large B cell lymphoma OCI-LY3 cells + 0.811uM etoposide for 24hr _vs_ untreated	4.56864	Chemical	etoposide	GSE51068	OCI-LY-3 Cell Line
Embryonic kidney HEK293 cells expressing luciferase - 0.5mM sodium arsenite for 45min _vs_ untreated	4.56864	Chemical	sodium arsenite	GSE70803	Not annotated
HCT116 colon cancer cells + H2O2 1hr _vs_ untreated control	4.56864	Chemical	Hydrogen peroxide	GSE3176	HCT 116 Cell Line
Hepatocytes of female donors treated 8hr with 15uM perhexiline _vs_ 0uM	4.56864	Chemical	Perhexiline	TG-GATES	Primary cells - cultured
HL-60 promyelocytic leukemia cells treated 5d with 0.1uM 1,25-dihydroxyvitamin D3 _vs_ vehicle	4.56864	Chemical	Vitamin D	GSE982	HL-60 Cell Line
MCF10A cells expressing PIK3CA H1047R mutant - LY294002 treated 4hr _vs_ untreated	4.56864	Chemical	LY 294002	GSE33403	MCF 10A Cell Line
MCF7 cells + thioguanosine, 12.6uM _vs_ DMSO vehicle	4.56864	Chemical	6-thioguanosine	GSE5258	MCF7 Cell Line
Pancreatic ductal adenocarcinoma AsPC-1 cells + 24hr PD 0332991 _vs_ untreated controls	4.56864	Chemical	PD 0332991	GSE39646	AsPC-1 Cell Line
PC3 cells + lasalocid, 6.6uM _vs_ DMSO vehicle	4.56864	Chemical	Lasalocid	GSE5258	PC-3 Cell Line [prostate cancer]
PC3 cells + prednisolone, 11uM _vs_ DMSO vehicle	4.56864	Chemical	Prednisolone	GSE5258	PC-3 Cell Line [prostate cancer]
Acute promyelocytic leukemia HL60 cells 96hr with 100nM DEC 24hr 20nM DEPSI _vs_ untreated	4.55284	Chemical	decitabine	GSE78102	HL-60 Cell Line
Breast cancer MCF7 cells - methionine and arginine deprived media treated 24hr _vs_ control media	4.55284	Chemical	Arginine	GSE62673	MCF7 Cell Line
HCT 116 p53 KO cells treated with 100nM actinomycin D _vs_ untreated	4.55284	Chemical	Actinomycin D	GSE12459	HCT 116 Cell Line
HEK293 cells treated with epoxomicin for 6hr _vs_ 0hr	4.55284	Chemical	epoxomicin	GSE14429	293 Cell Line
Hepatocytes of female donors treated 8hr with 330uM etoposide _vs_ 0uM	4.55284	Chemical	Etoposide	TG-GATES	Primary cells - cultured
HL60 cells + oxyphenbutazone, 12.4uM _vs_ DMSO vehicle	4.55284	Chemical	Oxyphenbutazone	GSE5258	HL-60 Cell Line
MCF7 cells + chlorcyclizine, 11.8uM _vs_ DMSO vehicle	4.55284	Chemical	chlorcyclizine	GSE5258	MCF7 Cell Line
PC3 cells + azacitidine, 16.4uM _vs_ DMSO vehicle	4.55284	Chemical	azacitidine	GSE5258	PC-3 Cell Line [prostate cancer]
Proneural mesenchymal mixed glioblastoma - genotoxic pretreatments _vs_ no pretreatments_GPL570	4.55284	Chemical	Mutagens	GSE13041	Primary tissue - fresh or fresh frozen
SH-SY5Y cells + 16 nM PMA _vs_ undifferentiated (no PMA)	4.55284	Chemical	phorbolol myristate acetate	GSE4600	SH-SY5Y Cell Line
B cell lymphoma KARPAS-422 cells treated 6d with 1uM (10x LCC) EPZ-6438 _vs_ 6d untreated	4.5376	Chemical	EPZ-6438	GSE49284	KARPAS-422 Cell Line
Cervical carcinoma HeLa-HIV cells treated 24hr with 20uM 1C8 compound _vs_ untreated controls	4.5376	Chemical	1C8	GSE76947	HeLa Cell Line
PBMCs of subjects reporting high inflammation after 1ng/kg LPS treatment _vs_ before	4.5376	Chemical	LPS	GSE87290	Blood fraction
Colorectal cancer cell lines treated for 48hr with sulindac sulfide _vs_ DMSO vehicle	4.52288	Chemical	sulindac sulfide	GSE18232	Cell line
DHL4 diffuse large B-cell lymphoma cells 24hr treated - SYK inhibitor R406 _vs_ DMSO	4.52288	Chemical	R 406 cpd	GSE43510	DHL-4 Cell Line
Diffuse_large B cell lymphoma OCI-LY3 cells + 13.8uM rapamycin for 6hr _vs_ untreated	4.52288	Chemical	rapamycin	GSE51068	OCI-LY-3 Cell Line
Endometrial cancer RL95-2 cells + 10X IC50 concentration of eribulin for 24hr _vs_ untreated	4.52288	Chemical	eribulin	GSE50832	RL95-2 Cell Line
Lung cancer A549 cells with GLP shRNA treated with 100nM dexamethasone for 24hr _vs_ 0hr	4.52288	Chemical	Dexamethasone	GSE94646	A549 Cell Line
Breast cancer MCF7 cells + 12hr 10uM Tanshinone IIA _vs_ DMSO	4.50864	Chemical	tanshinone II A	GSE85871	MCF7 Cell Line
Bronchial epithelial BEAS-2B cells treated 3wk - 2.5uM HgCl2 and 10nM TCDD _vs_ acetone controls	4.50864	Chemical	Mercuric Chloride	GSE83886	BEAS-2B Cell Line
Colorectal cancer DKO1 cells DNMT1 DNMT3B mutant + 0.3uM 5-aza-CdR 72hr _vs_ untreated	4.50864	Chemical	5-azacytidine	GSE43852	DKO-1 Cell Line
Hepatocyte-like cells derived from ESCs + 72hr 100uM IC10 benzo(a)pyrene _vs_ 0.5% DMSO	4.50864	Chemical	Benzo(a)pyrene	GSE40117	Primary cells - cultured
MCF7 cells + hycanthone, 11.2uM _vs_ DMSO vehicle	4.50864	Chemical	Hycanthone	GSE5258	MCF7 Cell Line
PC3 cells + metergoline, 10uM _vs_ DMSO vehicle	4.50864	Chemical	Metergoline	GSE5258	PC-3 Cell Line [prostate cancer]
Acute promyelocytic leukemia HL60 cells 24hr with 20nM DEPSI _vs_ untreated	4.49485	Chemical	Depsipeptides	GSE78102	HL-60 Cell Line
Breast cancer MCF7 cells + 1uM SAHA (vorinostat) for 24hr _vs_ vehicle	4.49485	Chemical	vorinostat	GSE69462	MCF7 Cell Line
Breast cancer MDA-MB-231 cells with luciferase siRNA + 5uM doxorubicin _vs_ untreated controls	4.49485	Chemical	Doxorubicin	GSE25741	MDA-MB-231 Cell Line
Hepatocytes of female donors treated 24hr with 140uM labetalol _vs_ 0uM	4.49485	Chemical	Labetalol	TG-GATES	Primary cells - cultured
Melanoma Me13 cells 8hr with 0.1uM BEZ235 _vs_ untreated controls	4.49485	Chemical	NVP BEZ235	GSE59882	Cell line
NSCLC HCC827 cells 24hr with 0.5uM gefitinib _vs_ DMSO controls	4.49485	Chemical	gefitinib	GSE75309	HCC827 Cell Line
Breast cancer MCF7 cells + 12hr 10uM Andrographolide _vs_ DMSO	4.48149	Chemical	andrographolide	GSE85871	MCF7 Cell Line
Lymphoblastoid TK6 cells mock-irradiated - 4hr 1nM TPA-treated _vs_ 4hr DMSO	4.48149	Chemical	phorbolol myristate acetate	GSE71521	TK6 Cell Line
Oligodendroglioma mouse xenografts w/ IDH1 R132H mutation + 150mg/kg/d AGI-5198 _vs_ vehicle control	4.48149	Chemical	AGI-5198	GSE45197	TS603 Cell Line
PC3 cells + benzamil, 11.2uM _vs_ DMSO vehicle	4.48149	Chemical	benzamil	GSE5258	PC-3 Cell Line [prostate cancer]
PC3 cells + pizotifen, 9.4uM _vs_ DMSO vehicle	4.48149	Chemical	Pizotyline	GSE5258	PC-3 Cell Line [prostate cancer]
Acute promyelocytic leukemia HL-60 cells in culture - vitamin D3 treated 72hr _vs_ untreated control	4.46852	Chemical	Vitamin D	GSE67826	HL-60 Cell Line
Endometrial cancer MFE-280 cells + 10X IC50 concentration of eribulin for 24hr _vs_ untreated	4.46852	Chemical	eribulin	GSE50832	MFE-280 Cell Line
Hepatic stellate cell myofibroblasts 16hr - 2.5ng/ml TGFB1 and 27uM nortriptyline _vs_ TGFB1 only	4.46852	Chemical	nortriptyline	GSE78853	Primary cells - cultured
HL60 cells + androsterone, 13.8uM _vs_ DMSO vehicle	4.46852	Chemical	Androsterone	GSE5258	HL-60 Cell Line
HT-1080 cells + 3uM versipelostatin 18hr _vs_ untreated control	4.46852	Chemical	versipelostatin	GSE13548	HT 1080 Cell Line
MCF7 breast cancer cells STAT3 shRNA and 10uM nutlin3a treated for 4hr _vs_ untreated	4.46852	Chemical	nutlin 3	GSE30183	MCF7 Cell Line
SK-4 esophageal cancer cells treated for 12hr with 5mM metformin _vs_ untreated	4.46852	Chemical	Metformin	GSE16816	Primary cells - cultured
SKBR3 line (mammary adenocarcinoma overexpressing HER2) + rapamycin 24hr _vs_ vehicle	4.46852	Chemical	Rapamycin	GSE26599	SK-BR-3 Cell Line
MCF7 cells + geldanamycin, 1uM _vs_ DMSO vehicle	4.45593	Chemical	geldanamycin	GSE5258	MCF7 Cell Line
Acute eosinophilic leukemia EOL1 cells + 1uM imatinib mesylate for 6hr _vs_ controls	4.4437	Chemical	imatinib	GSE53633	EOL-1 Cell Line
Huh7 hepatocarcinoma cells 10uM GENK treated for 4hr _vs_ DMSO control	4.4437	Chemical	genkwanin	GSE39002	HuH-7 Cell Line
MCF7 cells + proscillaridin, 7.6uM _vs_ DMSO vehicle	4.4437	Chemical	Proscillaridin	GSE5258	MCF7 Cell Line
MCF7 cells + strophanthidin, 9.8uM _vs_ DMSO vehicle	4.4437	Chemical	Strophanthidin	GSE5258	MCF7 Cell Line
PC3 cells + tetrandrine, 6.4uM _vs_ DMSO vehicle	4.4437	Chemical	tetrandrine	GSE5258	PC-3 Cell Line [prostate cancer]
LP9 mesothelial cells exposed 8hr to 1ug/cm2 crocidolite asbestos _vs_ untreated	4.4318	Chemical	Asbestos, Crocidolite	GSE14034	Meso LP9 Cell Line
Multiple myeloma MM1S cells 1nM salmeterol and 25nM dexamethasone treated 6hr _vs_ untreated	4.4318	Chemical	Dexamethasone	GSE30644	MM.1S Cell Line
Breast cancer MCF-7 cells (estrogen-independent) + 48hr 1uM fulvestrant _vs_ vehicle controls	4.42022	Chemical	fulvestrant	GSE22533	MCF7 Cell Line
Hepatocellular carcinoma HepG2 cells + 2mM tolbutamide for 24hr _vs_ vehicle (DMSO)	4.42022	Chemical	Tolbutamide	GSE51952	Hep G2 Cell Line
HL60 cells + adenosine phosphate, 11uM _vs_ DMSO vehicle	4.42022	Chemical	adenosine phosphate	GSE5258	HL-60 Cell Line
HL60 cells + betazole, 27uM _vs_ DMSO vehicle	4.42022	Chemical	Betazole	GSE5258	HL-60 Cell Line
MCF7 cells + vorinostat, 10uM _vs_ DMSO vehicle	4.42022	Chemical	vorinostat	GSE5258	MCF7 Cell Line
Nalm27 line treated with L-asp for 2 hr _vs_ pretreatment	4.42022	Chemical	Asparagine	GSE4397	Cell line
PC3 cells + alclometasone, 7.6uM _vs_ DMSO vehicle	4.42022	Chemical	alclometasone dipropionate	GSE5258	PC-3 Cell Line [prostate cancer]
TK6 spherocytic spleen cells 1mM ethyl methanesulfonate treated 24hr _vs_ untreated	4.42022	Chemical	Ethyl Methanesulfonate	GSE41296	TK6 Cell Line
Trabecular meshwork treated with 0.1mg per ml Triamcinolone acetonide _vs_ benzyl alcohol treated	4.42022	Chemical	Triamcinolone acetonide	GSE6298	Primary cells - cultured
Breast cancer HCC-2218 cells + 10X IC50 concentration of eribulin for 24hr _vs_ untreated	4.40894	Chemical	eribulin	GSE50832	HCC2218 Cell Line
Breast cancer MCF7 cells + 5uM Nutlin-3A for 24hr _vs_ untreated	4.40894	Chemical	nutlin 3	GSE47042	MCF7 Cell Line
Cervical carcinoma HeLa-HIV cells treated 24hr with 5uM 1C8 compound _vs_ untreated controls	4.40894	Chemical	1C8	GSE76947	HeLa Cell Line
Dermal fibroblasts (C18) - 3uM sphingosine-1-phosphate treated 4hr _vs_ untreated_GPL6480	4.40894	Chemical	sphingosine 1-phosphate	GSE56308	Primary cells - cultured
Ewings Sarcoma TC71 cells - 3uM YK-4-279 treated for 72hr _vs_ untreated	4.40894	Chemical	YK-4-279	GSE61042	TC-71 Cell Line
FL2 normal diploid fibroblasts control siRNA - 200ng/ml doxorubicin treated 26hr _vs_ untreated	4.40894	Chemical	Doxorubicin	GSE42368	FL2 Cell Line
HCT-8 colon cancer enterocyte cell line +1 mM indole for 24hr _vs_ untreated	4.40894	Chemical	indole	GSE14379	HRT-18 Cell Line
MCF7 cells + pizotifen, 9.4uM _vs_ DMSO vehicle	4.40894	Chemical	Pizotyline	GSE5258	MCF7 Cell Line
Small acute monocytic leukemia cells (THP-1) 100ug/ml TiO2-NB treated 24hr _vs_ untreated control	4.40894	Chemical	titanium dioxide	GSE42069	Cell line
PC3 cells + betamethasone, 10.2uM _vs_ DMSO vehicle	4.39794	Chemical	Dexamethasone	GSE5258	PC-3 Cell Line [prostate cancer]
Prostate cancer PC-3 cells - 1uM methionine media treated 24hr _vs_ 200uM methionine control media	4.39794	Chemical	Methionine	GSE62673	PC-3 Cell Line [prostate cancer]
Acute monocyte leukemia cell line THP1 - stimulated with Infliximab for 24hr _vs_ untreated	4.38722	Chemical	infliximab	GSE33585	THP-1 Cell Line
Diffuse large B cell lymphoma DHL4 cells treated 24hr with 1uM R406 _vs_ 0hr DMSO controls	4.38722	Chemical	R 406 cpd	GSE34176	DHL-4 Cell Line
Diffuse_large B cell lymphoma OCI-LY3 cells + 13.8uM rapamycin for 12hr _vs_ untreated	4.37675	Chemical	rapamycin	GSE51068	OCI-LY-3 Cell Line
MCF7 breast cancer polysome RNA - 1uM PP242 treated 12hr _vs_ vehicle control	4.37675	Chemical	PP242	GSE36847	MCF7 Cell Line
Renal cell carcinoma 786-O cell xenografts from mice - 80mg/kg sorafenib treated _vs_ untreated	4.37675	Chemical	sorafenib	GSE64052	786-O Cell Line
Breast adenocarcinoma MCF7 cells treated with 1uM PP242 then 4hr with 10nM E2 _vs_ EtOH controls	4.36653	Chemical	Heterocyclic Compounds	GSE73663	MCF7 Cell Line
Diffuse_large B cell lymphoma OCI-LY3 cells + 0.553uM mitomycin D for 24hr _vs_ untreated	4.36653	Chemical	mitomycinD	GSE51068	OCI-LY-3 Cell Line
Hepatic stellate cells 30ug/ml Nanosun ZnO nanoparticle treated 24hr _vs_ untreated	4.36653	Chemical	Zinc Oxide Nanoparticles	GSE60159	Primary cells - cultured
MCF7 cells + isoxsuprine, 11.8uM _vs_ DMSO vehicle	4.36653	Chemical	Isoxsuprine	GSE5258	MCF7 Cell Line
MCF7 cells + trimipramine, 9.8uM _vs_ DMSO vehicle	4.36653	Chemical	Trimipramine	GSE5258	MCF7 Cell Line
Melanoma A375 cells + p53-siRNA - treated 26hr with 1650nM MLN4924 _vs_ 26hr DMSO	4.36653	Chemical	MLN4924	GSE39091	A-375 Cell Line
Ovarian cancer HeyA8 cells + GI50 concentration of cisplatin for 48hr _vs_ untreated	4.36653	Chemical	Cisplatin	GSE47856	Hey-A8 Cell Line
B cells (CD19+) of CLL patients after treatment with FCR _vs_ before treatment	4.35655	Chemical	FCR	GSE15490	Primary cells
Fibrosarcoma HT1080 cells - 500uM methyl methanesulfonate treated for 24hr _vs_ DMSO control	4.35655	Chemical	Methyl Methanesulfonate	GSE59368	HT 1080 Cell Line
HL60 cells + finasteride, 10.8uM _vs_ DMSO vehicle	4.35655	Chemical	Finasteride	GSE5258	HL-60 Cell Line
Lymphoma U937 cell line treated for 3hr with 100nM shikonin _vs_ DMSO treated	4.35655	Chemical	shikonin	GSE24743	U-937 Cell Line
Prostate cancer PC-3 cells - 0uM methionine media treated 24hr _vs_ 200uM methionine control media	4.35655	Chemical	Methionine	GSE62673	PC-3 Cell Line [prostate cancer]
Embryonic H1 stem cell line - dorsomorphin induced 12hr _vs_ 0hr	4.34679	Chemical	(6-(4-(2-piperidin-1-ylethoxy)phenyl))-3-pyridin-4-ylpyrazolo(1,5-a)pyrimidine	GSE68624	H1 Stem Cell Line
Breast cancer cells MCF-7 expressing ERB + 10nM estradiol for 24hr _vs_ vehicle	4.33724	Chemical	Estradiol	GSE56066	MCF7 Cell Line
Burkitt lymphoma BL-2 cells with IKBKB KO - 3hr 10uM SP600125 _vs_ untreated	4.33724	Chemical	SP600125	GSE71725	BL-2 Cell Line
HepG2 hepatocellular carcinoma cell line 2mM DMN treated for 48hr _vs_ DMSO control	4.33724	Chemical	Dimethylnitrosamine	GSE28878	Hep G2 Cell Line
HepG2 hepatocellular carcinoma cell line 500nM TPA treated for 24hr _vs_ DMSO control	4.33724	Chemical	pma	GSE28878	Hep G2 Cell Line
HepG2 hepatocellular carcinoma cell line 500nM TPA treated for 48hr _vs_ DMSO control	4.33724	Chemical	phorbolol myristate acetate	GSE28878	Hep G2 Cell Line
HL-60 promyelocytic leukemia cells treated 5d with 70uM 16-ketoestradiol _vs_ vehicle	4.33724	Chemical	16-ketoestradiol	GSE982	HL-60 Cell Line
MCF7 cells + metergoline, 10uM _vs_ DMSO vehicle	4.33724	Chemical	Metergoline	GSE5258	MCF7 Cell Line
PC3 cells + alimemazine, 5.4uM _vs_ DMSO vehicle	4.33724	Chemical	Trimeprazine	GSE5258	PC-3 Cell Line [prostate cancer]
Prostate cancer androgen-independent PC3 cells + 15uM sulforaphane for 6hr _vs_ vehicle (DMSO)	4.33724	Chemical	sulforafan	GSE48812	PC-3 Cell Line [prostate cancer]
Endometrial cancer HEC-6 cells + 10X IC50 concentration of eribulin for 24hr _vs_ untreated	4.3279	Chemical	eribulin	GSE50832	HEC-6 Cell Line
Hepatocytes of female donors treated 24hr with 330uM etoposide _vs_ 0uM	4.3279	Chemical	Etoposide	TG-GATES	Primary cells - cultured
HepG2 hepatocellular carcinoma cell line 2mM NPD treated for 48hr _vs_ DMSO control	4.3279	Chemical	Phenylenediamines	GSE28878	Hep G2 Cell Line
K562 erythroleukemia cells treated 12hr with 0.15mM calactin _vs_ untreated	4.3279	Chemical	calactin	GSE20928	K-562 Cell Line
Lung fibroblasts mometasone and RU-486 treated for 6hr _vs_ 0hr baseline control	4.3279	Chemical	mometasone	GSE30242	Primary cells - cultured
Ovarian cancer OV1002 xenografts chemosensitive - carboplatin-paclitaxel 4d _vs_ untreated	4.3279	Chemical	Carboplatin	GSE49577	Cell line
PC3 cells + promazine, 12.4uM _vs_ DMSO vehicle	4.3279	Chemical	Promazine	GSE5258	PC-3 Cell Line [prostate cancer]
Fibrosarcoma HT1080 cells - 10uM quercetin treated for 24hr _vs_ DMSO control	4.31876	Chemical	Quercetin	GSE59368	HT 1080 Cell Line
MCF7 cells + cyproheptadine, 12.4uM _vs_ DMSO vehicle	4.31876	Chemical	Cyproheptadine	GSE5258	MCF7 Cell Line
Non-small cell lung cancer NCI-H1299 cells treated 6hr with 0.5uM MS417 _vs_ DMSO	4.31876	Chemical	MS417	GSE89932	NCI-H1299 Cell Line
Breast cancer CAL-51 cells + 10X IC50 concentration of paclitaxel for 24hr _vs_ untreated	4.3098	Chemical	Paclitaxel	GSE50832	CAL 51 Cell Line
Embryonic kidney T-REx-293 cells 6hr with 10uM ER proteostasis regulator compound 147 _vs_ DMSO	4.3098	Chemical	compound 147	GSE84636	293 Cell Line
HL60 cells + albendazole, 15uM _vs_ DMSO vehicle	4.3098	Chemical	Albendazole	GSE5258	HL-60 Cell Line
Acute monocytic leukemia THP-1 cells - 2uM GSK126 treated for 24hr _vs_ untreated	4.30103	Chemical	GSK126	GSE71671	THP-1 Cell Line
Cervical carcinoma SiHa cells 50ug/ml cidofovir treated 72hr _vs_ untreated	4.30103	Chemical	cidofovir	GSE26748	SiHa Cell Line
Diffuse large B-cell lymphoma Karpas422 cells + 5uM EZH2-inhibitor EI1 for 6d _vs_ 3d	4.29243	Chemical	EI1	GSE41315	KARPAS-422 Cell Line
HL60 cells + cyproterone, 9.6uM _vs_ DMSO vehicle	4.29243	Chemical	Cyproterone	GSE5258	HL-60 Cell Line
Multiple myeloma LP-1 cells treated with 250nM CPI203 for 6hr _vs_ DMSO	4.29243	Chemical	CPI203	GSE64317	LP-1 Cell Line
Hepatocytes of female donors treated 8hr with 4000uM ranitidine _vs_ 0uM	4.284	Chemical	Ranitidine	TG-GATES	Primary cells - cultured
MCF7 cells + bisacodyl, 11uM _vs_ DMSO vehicle	4.284	Chemical	Bisacodyl	GSE5258	MCF7 Cell Line
PC3 cells + econazole, 9uM _vs_ DMSO vehicle	4.284	Chemical	Econazole	GSE5258	PC-3 Cell Line [prostate cancer]
Prostate carcinoma VCaP cells treated 24hr with 0.5uM GSK525762A _vs_ DMSO vehicle	4.284	Chemical	GSK525762A	GSE56352	VCaP Cell Line
Acute promyelocytic leukemia HL60 cells 96hr with 100nM DEC + 1uM GSK343 _vs_ untreated	4.27572	Chemical	GSK343	GSE78102	HL-60 Cell Line
Hepatocytes of female donors treated 24hr with 50uM flutamide _vs_ 0uM	4.27572	Chemical	Flutamide	TG-GATES	Primary cells - cultured
Hepatocytes of female donors treated 8hr with 5000uM acetaminophen _vs_ 0uM	4.27572	Chemical	Acetaminophen	TG-GATES	Primary cells - cultured
HUVECs grown 24hr in normoxia after treatment 45min with 100uM propranolol _vs_ untreated controls	4.27572	Chemical	Propranolol	GSE86793	Primary cells - cultured
MCF7 cells + nicardipine, 7.8uM _vs_ DMSO vehicle	4.27572	Chemical	Nicardipine	GSE5258	MCF7 Cell Line
PC3 cells + cephaeline, 6uM _vs_ DMSO vehicle	4.27572	Chemical	cephaelin	GSE5258	PC-3 Cell Line [prostate cancer]
Breast adenocarcinoma MCF7 cells azacytidine treated for 12hr _vs_ untreated	4.26761	Chemical	Azacitidine	GSE10145	MCF7 Cell Line
Hepatocellular carcinoma hepatocyte HepaRG cells + 6hr 100uM ketoconazole _vs_ DMSO	4.26761	Chemical	ketoconazole	GSE69851	HepaRG Cell Line
N/Tert-1 foreskin keratinocytes expressing HPV 8E6 + 2ug/ml mitomycin C 18hr _vs_ empty vector	4.26761	Chemical	Mitomycin	GSE50568	Cell line
Breast cancer MCF7 cells treated 6hr with 50nM rohinitib _vs_ controls (DMSO)	4.25964	Chemical	rohinitib	GSE45851	MCF7 Cell Line
Embryonic H1 stem cell line - dorsomorphin induced 24hr _vs_ 0hr	4.25964	Chemical	(6-(4-(2-piperidin-1-ylethoxy)phenyl))-3-pyridin-4-ylpyrazolo(1,5-a)pyrimidine	GSE68624	H1 Stem Cell Line
H441 lung adenocarcinoma cells treated 12hr with 1uM curcuminoid CLEFMA _vs_ DMSO vehicle	4.25964	Chemical	CLEFMA	GSE23420	NCI-H441 Cell Line
HL60 cells + halcinonide, 8.8uM _vs_ DMSO vehicle	4.25964	Chemical	Halcinonide	GSE5258	HL-60 Cell Line
Monocytes treated 10min with 10ug/ml TLR10 antibody - 10ng/ml LPS _vs_ no LPS	4.25964	Chemical	LPS	GSE94969	Primary cells - cultured
Hepatocytes of female donors treated 8hr with 28uM labetalol _vs_ 0uM	4.24413	Chemical	Labetalol	TG-GATES	Primary cells - cultured
Lung cancer A549 cells - single-walled carbon nanotubes _vs_ water controls_GPL6244	4.24413	Chemical	Nanotubes, Carbon	GSE53765	A549 Cell Line
PC3 cells + phenazopyridine, 16uM _vs_ DMSO vehicle	4.24413	Chemical	Phenazopyridine	GSE5258	PC-3 Cell Line [prostate cancer]
Tumorigenic foreskin fibroblast BJ LTSTERas cells + 24hr 25uM vorinostat _vs_ control (DMSO)	4.24413	Chemical	vorinostat	GSE43010	BJ Cell Line [foreskin]
Colon cancer HT 115 cells with UGT1A_i2 shRNA and 0.5uM SN-38 _vs_ shRNA vehicle controls	4.23657	Chemical	SN-38	GSE48118	HT 115 Cell Line
Endometrial cancer HEC-151 cells + 10X IC50 concentration of eribulin for 24hr _vs_ untreated	4.22915	Chemical	eribulin	GSE50832	HEC-151 Cell Line
Ewing's sarcoma of bone TC-71 cells treated 6hr with 25nM MG-262 _vs_ DMSO controls	4.22915	Chemical	MG 262	GSE80640	TC-71 Cell Line
PBMCs TCR activated with anti-CD3/CD28 for 24hr after 30min 10nM FK506 _vs_ TCR activation only	4.22915	Chemical	FK-506	GSE43210	Blood fraction
HL60 cells + pergolide, 9.8uM _vs_ DMSO vehicle	4.22185	Chemical	Pergolide	GSE5258	HL-60 Cell Line
Lung cancer A549 cells - 30umol/L sulforaphene treated for 24hr _vs_ sterile water treated controls	4.22185	Chemical	sulphoraphene	GSE48899	A549 Cell Line
Bronchial epithelial BEAS-2B cells treated 3wk - 2.5uM HgCl2 _vs_ acetone controls	4.21467	Chemical	Mercuric Chloride	GSE83886	BEAS-2B Cell Line
Dermal fibroblasts CDDO treated 24hr _vs_ untreated control	4.21467	Chemical	2-cyano-3,12-dioxoolean-1,9-dien-28-oic acid	GSE47616	Not annotated
Mammary luminal epithelial cells treated 36hr with 5-flourouracil _vs_ media alone	4.21467	Chemical	5-Fluorouracil	GSE763	MCF7 Cell Line
Monocytes from blood + 6hr 30mg/mL Gardasil _vs_ media_GPL10558	4.21467	Chemical	Gardasil	GSE44722	Primary cells - cultured
Breast cancer MCF-7 cells with TP53BP1 knockout-1 treated 8hr with 4uM nutlin-3 _vs_ mock	4.20761	Chemical	nutlin 3	GSE84986	MCF7 Cell Line
Hepatocytes of female donors treated 8hr with 2000uM enalapril _vs_ 0uM	4.20761	Chemical	Enalapril	TG-GATES	Primary cells - cultured
Hepatocytes of female donors treated 8hr with 800uM colchicine _vs_ 0uM	4.20761	Chemical	Colchicine	TG-GATES	Primary cells - cultured
Jurkat T-cells 6hr post 100nM Dibutyltin dichloride treatment _vs_ untreated	4.20761	Chemical	dibutyldichlorotin	GSE46909	Jurkat Cell Line
Ovarian cancer TOV-21G cells + 10X IC50 concentration of eribulin for 24hr _vs_ untreated	4.20761	Chemical	eribulin	GSE50832	TOV-21G Cell Line
Foreskin fibroblasts treated 16hr with 40uM ferrous sulfate _vs_ untreated	4.20066	Chemical	ferrous sulfate	GSE16349	Cell line
Hepatocytes of female donors treated 24hr with 20uM fluphenazine _vs_ 0uM	4.20066	Chemical	Fluphenazine	TG-GATES	Primary cells - cultured
SK-4 esophageal cancer cells + 4mM deoxy-glucose and 5mM metformin 12hr _vs_ untreated	4.20066	Chemical	Deoxyglucose	GSE16816	Primary cells - cultured
T-cell acute lymphoblastic leukemia MOLT-4 cells JQ1 treated 2hr _vs_ DMSO 2hr control	4.20066	Chemical	JQ1	GSE79253	MOLT-4 Cell Line
786-O cells + ZINC00125864 _vs_ DMSO	4.18709	Chemical	ZINC00125864	GSE13818	786-O Cell Line
Ewing sarcoma cell line SK-ES-1 treated with 5-AZA 2.5 uM for 120hr _vs_ mock treated	4.18709	Chemical	decitabine	GSE36858	SK-ES-1 Cell Line
Melanoma UACC62 cells in vitro - 0.1uM Vemurafenib treated 48hr _vs_ untreated	4.18709	Chemical	vemurafenib	GSE64741	UACC62 Cell Line
HCT 116 p53 KO cells treated with 4uM nutlin-3 _vs_ untreated	4.18046	Chemical	nutlin 3	GSE12459	HCT 116 Cell Line
MCF7 cells + diethylstilbestrol, 15uM _vs_ DMSO vehicle	4.18046	Chemical	Diethylstilbestrol	GSE5258	MCF7 Cell Line
MCF7 cells + vanoxerine, 7.6uM _vs_ DMSO vehicle	4.18046	Chemical	vanoxerine	GSE5258	MCF7 Cell Line
Pancreatic carcinoma MIAPaCa-2 cells treated 6hr with 0.5uM MS417 _vs_ DMSO	4.18046	Chemical	MS417	GSE89932	MIA PaCa-2 Cell Line
Prostate cancer PC-3 cells - 5uM methionine media treated 24hr _vs_ 200uM methionine control media	4.18046	Chemical	Methionine	GSE62673	PC-3 Cell Line [prostate cancer]
Diffuse large B cell lymphoma cells lines - 500nM OTX015 treated 12hr _vs_ DMSO	4.17393	Chemical	OTX015	GSE64820	Cell line
Diffuse large B celllymphoma SUDHL2 cells - 500nM OTX015 treated 12hr _vs_ DMSO	4.17393	Chemical	OTX015	GSE64820	SU-DHL-2 Cell Line
RKO human colorectal carcinoma cells + 60uM 4-hydroxy-2-nonenal (HNE) 24hr _vs_ control 24hr	4.17393	Chemical	4-hydroxy-2-nonenal	GSE2397	RKO Cell Line
Acute myelomonocytic leukemia xenografts from bone marrow + 3d 2.5mg/kg LY2510924 _vs_ untreated	4.16749	Chemical	CXCR4 Peptide Antagonist LY2510924	GSE64623	Xenograft
Colorectal cancer YB5 cells treated 48hr with 100nM DAC _vs_ controls	4.16749	Chemical	decitabine	GSE89154	Cell line
HCT116 cell line treated with 5-FU 12hr _vs_ untreated	4.16749	Chemical	5-Fluorouracil	E-MEXP-390	HCT 116 Cell Line
HL-60 cells + 100 uM curcumin 24hr _vs_ 5% DMSO vehicle control	4.16749	Chemical	Curcumin	GSE16160	HL-60 Cell Line
Hodgkins lymphoma L-540 cell line - 5uM sorafenib treated 24hr _vs_ vehicle control	4.16749	Chemical	sorafenib	GSE31060	L-540 Cell Line
HL60 cells + (-)-isoprenaline, 16.2uM _vs_ DMSO vehicle	4.16115	Chemical	Isoproterenol	GSE5258	HL-60 Cell Line
HL60 cells + spironolactone, 9.6uM _vs_ DMSO vehicle	4.16115	Chemical	Spironolactone	GSE5258	HL-60 Cell Line
MCF7 cells + metitepine, 8.4uM _vs_ DMSO vehicle	4.16115	Chemical	Methiothepin	GSE5258	MCF7 Cell Line
Melanoma cells with DNA methylation reversed after 5uM 5AzadC every 24hr for 48hr _vs_ 0hr	4.16115	Chemical	5-azacytidine	GSE9118	Cell line
Uveal melanoma cell lines (pooled) without GNAQ or GNA11 mutations + JQ1 for 24hr _vs_ untreated	4.1549	Chemical	JQ1	GSE66048	Cell line
Colorectal cancer HCT 116 cells mock transfected + 4hr 2.5uM vorinostat _vs_ 4hr DMSO	4.14874	Chemical	vorinostat	GSE57871	HCT 116 Cell Line
HL60 cells + dydrogesterone, 12.8uM _vs_ DMSO vehicle	4.14874	Chemical	Dydrogesterone	GSE5258	HL-60 Cell Line
MCF7 breast cancer cells control shRNA and 10uM nutlin3a treated for 4hr _vs_ untreated	4.14267	Chemical	nutlin 3	GSE30183	MCF7 Cell Line
Bronchial epithelial AIR-100 cells 24hr post 21min 15% cigarette smoke exposure _vs_ synthetic air	4.13668	Chemical	Tobacco smoke	E-MTAB-874	Primary cells - cultured
Acute monocytic leukemia cell line THP-1 + Ganoderma lucidum polysaccharides 6hr _vs_ untreated	4.13077	Chemical	lingzhi	GSE16014	THP-1 Cell Line
Breast adenocarcinoma MCF7 cells treated 4d with 5uM AZA _vs_ DMSO	4.11919	Chemical	Azacitidine	GSE71363	MCF7 Cell Line
HT-29 cells normal conditions + 10uM versipelostatin 18hr _vs_ untreated control	4.11919	Chemical	versipelostatin	GSE13548	HT 29 Cell Line
HUVECs grown 24hr in hypoxia after treatment 45min with 100uM propranolol _vs_ untreated controls	4.11351	Chemical	Propranolol	GSE86793	Primary cells - cultured
Non-small cell lung cancer cells with EGFR mutant + 1mM EGFR inhibitor erlotinib 24hr _vs_ DMSO	4.10791	Chemical	erlotinib	GSE57156	Not annotated
Serous ovarian adenocarcinoma cell lines + 300mM indomethacin for 24hr _vs_ untreated	4.10791	Chemical	Indomethacin	GSE45052	Cell line
NHBE cells treated with 5uM 5-aza-dCTP for 3d and 300nM TSA on last day _vs_ vehicle	4.10237	Chemical	trichostatin A	GSE18454	Primary cells - cultured
Colorectal cancer HCT 116 cells after GLI1 siRNA knockdown + 8hr 2.5uM vorinostat _vs_ 8hr DMSO	4.09691	Chemical	vorinostat	GSE57871	HCT 116 Cell Line
Diffuse large B celllymphoma SUDHL6 cells - 500nmol/L OTX015 treated 12hr _vs_ DMSO	4.09151	Chemical	OTX015	GSE64820	SU-DHL-6 Cell Line
Immortalized keratinocyte HaCaT cells (HPV-) - 50ug/ml cidofovir for 72hr _vs_ untreated	4.09151	Chemical	cidofovir	GSE39293	HaCaT Cell Line
Skin fibroblasts of Li-Fraumeni patient immortalized - 5-aza-induced senescence _vs_ uninduced	4.09151	Chemical	5-azacytidine	GSE60340	Cell line
Swan-71 trophoblast cell line + CoCl2 (200nM) 24hr _vs_ PBS	4.09151	Chemical	cobaltous chloride	GSE31679	Swan 71 Cell Line
U-266 cells 10uM 5-Azacytidine treated 24hr then 10uM panobinostat treated 4hr _vs_ untreated	4.09151	Chemical	Azacitidine	GSE56623	U-266B1 Cell Line
Diffuse large B-cell lymphoma OCI-Ly1 cells + 500nM JQ1 for 6hr _vs_ vehicle (DMSO)	4.08619	Chemical	JQ1	GSE45630	OCI-LY-1 Cell Line
Hepatocytes of female donors treated 24hr with 300uM ajmaline _vs_ 0uM	4.08619	Chemical	Ajmaline	TG-GATES	Primary cells - cultured
HepG2 hepatocellular carcinoma cell line 60uM MOCA treated for 48hr _vs_ DMSO control	4.08092	Chemical	Methylenebis(chloroaniline)	GSE28878	Hep G2 Cell Line
MCF7 cells + propofol, 22.4uM _vs_ DMSO vehicle	4.08092	Chemical	Propofol	GSE5258	MCF7 Cell Line
Hepatocytes of male donors treated 24hr with 10000uM methimazole _vs_ 0uM	4.07572	Chemical	Methimazole	TG-GATES	Primary cells - cultured
MCF7 breast cancer cells treated 6hr with 5x IC50 of HSP90 inhibitor 17AAG _vs_ untreated	4.07572	Chemical	17-(allylamino)-17-demethoxygeldanamycin	GSE18552	MCF7 Cell Line
Lambda light chain myeloma MM1S cells + 10uM BRD9876 for 6hr _vs_ vehicle (DMSO)	4.07058	Chemical	BRD9876	GSE64178	MM.1S Cell Line
Prostate adenocarcinoma LNCaP cells treated for 24hr with 40uM urolithin A _vs_ untreated controls	4.07058	Chemical	urolithin A	GSE65527	LNCaP Cell Line
AML THP-1 cells 24hr Mycobacterium tuberculosis infected - with 100uM resveratrol _vs_ without	4.0655	Chemical	resveratrol	GSE78233	THP-1 Cell Line
Colorectal cancer YB5 cells treated 48hr with 100nM DAC then 48hr with 50nM prosA _vs_ controls	4.0655	Chemical	decitabine	GSE89154	Cell line
HepG2 hepatocellular carcinoma cell line 250uM COU treated for 48hr _vs_ DMSO control	4.0655	Chemical	Coumaphos	GSE28878	Hep G2 Cell Line
MCF7 cells + cicloheximide, 14.2uM _vs_ DMSO vehicle	4.0655	Chemical	Cycloheximide	GSE5258	MCF7 Cell Line
Sebocytes SEB-1 treated 72hr with 0.1uM 13-cis retinoic acid _vs_ DMSO vehicle controls_GPL8300	4.0655	Chemical	Isotretinoin	GSE10434	SEB-1 Cell Line
HepG2 hepatocellular carcinoma cell line 12.5uM Res treated for 12hr _vs_ DMSO control	4.06048	Chemical	Reserpine	GSE28878	Hep G2 Cell Line
Melanoma A375 cells + p53-siRNA - treated 26hr with 100nM daunorubicin _vs_ 26hr DMSO	4.06048	Chemical	Daunorubicin	GSE39091	A-375 Cell Line
Plasmacytoid dendritic cells stimulated 18hr with 0.5uM CpG-C _vs_ untreated	4.05552	Chemical	CPG-ODN	GSE79272	Primary cells
Pterygia cells from Hispanic patients 50ug/mL doxycycline treated 24hr _vs_ untreated	4.05552	Chemical	Doxycycline	GSE34736	Primary cells - cultured
Activated peripheral blood T cells + H202 4hr _vs_ 0hr	4.05061	Chemical	Hydrogen peroxide	GSE6607	Blood fraction
Pancreatic ductal adenocarcinoma 1108 cells 10hr with 1.6uM CPI203 _vs_ untreated controls	4.05061	Chemical	CPI203	GSE55209	Cell line
Fibrosarcoma HT1080 cells - 0.03uM etoposide treated for 24hr _vs_ DMSO control	4.04576	Chemical	Etoposide	GSE59368	HT 1080 Cell Line
HL60 cells + trifluoperazine, 10uM _vs_ DMSO vehicle	4.04096	Chemical	Trifluoperazine	GSE5258	HL-60 Cell Line
Primary aortic endothelial cells + 500nM SAHA for 12hr _vs_ untreated	4.04096	Chemical	vorinostat	GSE54912	Primary cells - cultured
TaY cells + 15nM bortezomib _vs_ vehicle	4.04096	Chemical	bortezomib	GSE6034	Cell line
U87 glioblastoma xenografts 10mg/kg/3d bevacizumab treated _vs_ saline treated	4.04096	Chemical	bevacizumab	GSE37956	U-87 MG Cell Line
Uveal melanoma 92.1 cell line (GNAQ mutant) Selumetinib treated 8hr _vs_ untreated	4.04096	Chemical	AZD 6244	GSE33655	92.1 Cell Line
HL60 cells + kaempferol, 14uM _vs_ DMSO vehicle	4.03621	Chemical	kaempferol	GSE5258	HL-60 Cell Line
Diffuse_large B cell lymphoma OCI-LY3 cells + 0.101uM doxorubicin for 6hr _vs_ untreated	4.03152	Chemical	doxorubicin	GSE51068	OCI-LY-3 Cell Line
HL60 cells + domperidone, 7.4uM _vs_ DMSO vehicle	4.03152	Chemical	Domperidone	GSE5258	HL-60 Cell Line
MCF7 cells + oxybutynin, 10.2uM _vs_ DMSO vehicle	4.03152	Chemical	oxybutynin	GSE5258	MCF7 Cell Line
Hepatocytes of female donors treated 8hr with 1500uM caffeine _vs_ 0uM	4.02687	Chemical	Caffeine	TG-GATES	Primary cells - cultured
Jurkat cells + 0.2mg-l Ag ions 24hr _vs_ untreated	4.02687	Chemical	Silver	GSE20692	Jurkat Clone E6-1 Cell Line
Monocytes + 100ng/mL LPS 24hr _vs_ 1hr	4.02687	Chemical	Lipopolysaccharides	GSE85243	Primary cells - cultured
293T embryonic kidney cells CREB1 dominant negative treated 1hr with forskolin _vs_ untreated_GPL96	4.02228	Chemical	Forskolin	GSE2060	293T Cell Line
Lung A549 cells + 24hr PEGylated ormosil NP + 24hr culture _vs_ 48hr culture controls	4.01323	Chemical	ormosil	GSE25991	A549 Cell Line
Swan-71 trophoblast cell line + CoCl2 (400nM) 24hr _vs_ PBS	4.01323	Chemical	cobaltous chloride	GSE31679	Swan 71 Cell Line
Uveal melanoma C918 cells without GNAQ or GNA11 mutations + JQ1 for 24hr _vs_ untreated	4.01323	Chemical	JQ1	GSE66048	Cell line
Colorectal cancer HCT116 cells ACL siRNA - treated with 5mM butyrate for 3d _vs_ untreated	4.00877	Chemical	Butyrate	GSE41113	HCT 116 Cell Line
MCF7 cells + nortriptyline, 13.4uM _vs_ DMSO vehicle	4.00877	Chemical	Nortriptyline	GSE5258	MCF7 Cell Line
Hepatocytes of female donors treated 24hr with 80uM tacrine _vs_ 0uM	4.00436	Chemical	Tacrine	TG-GATES	Primary cells - cultured
HL60 cells + lithocholic acid, 10.6uM _vs_ DMSO vehicle	4.00436	Chemical	Lithocholic Acid	GSE5258	HL-60 Cell Line
NSCLC cancer NCI-H1299 T18 cells treated 24hr - 1uM GSK-J4 _vs_ DMSO controls	4.00436	Chemical	GSK-J4	GSE77209	NCI-H1299 Cell Line
B lymphocyte of daughter of Scott syndrome treated with 200nM A23187 Ca2+ ionophore _vs_ untreated	4	Chemical	Calcimycin	GSE1028	Primary cells - cultured
Blast cells from M4 acute myeloblastic leukemia patients - 1mM ATP treated 24hr _vs_ untreated	4	Chemical	Adenosine Triphosphate	GSE30903	Primary cells
Breast adenocarcinoma CAMA1 cells 1uM MK2206 treated 8hr _vs_ DMSO	4	Chemical	MK2206	GSE64033	CAMA-1 Cell Line
Breast adenocarcinoma MDA-MB-231 cells treated 96hr with 10nM LBH589 _vs_ DMSO	4	Chemical	LBH589	GSE92910	MDA-MB-231 Cell Line
Breast adenocarcinoma MDA-MB-468 cells treated for 3hr - 1000nM BETi-211 _vs_DMSO controls	4	Chemical	BETi-211	GSE95375	MDA-MB-468 Cell Line
Breast cancer HCC-1428 cells (estrogen independent) + 48hr 1uM fulvestrant _vs_ vehicle controls	4	Chemical	fulvestrant	GSE22533	HCC1428 Cell Line
Breast cancer HCC1599 cells (actived NOTCH1) 1uM MRK-003 72hr _vs_ untreated	4	Chemical	MRK 003	GSE59810	HCC1599 Cell Line
Breast cancer MCF7 cells - all amino acids deprived media treated 24hr _vs_ control media	4	Chemical	Amino Acids	GSE62673	MCF7 Cell Line
Breast cancer MCF7 cells + 12hr 10uM Magnolol _vs_ DMSO	4	Chemical	magnolol	GSE85871	MCF7 Cell Line
Breast cancer MCF-7 cells with TP53BP1 knockout-2 treated 8hr with 4uM nutlin-3 _vs_ mock	4	Chemical	nutlin 3	GSE84986	MCF7 Cell Line
Breast cancer MDA-MB-157 cells insensitive to indole-3-carbinol + 200uM I3C 24hr _vs_ control (DMSO)	4	Chemical	indole-3-carbinol	GSE55897	MDA-MB-157 Cell Line
Breast cancer MDA-MB-453 cells + 24hr 10uM erlotinib _vs_ untreated controls	4	Chemical	erlotinib	GSE30516	MDA-MB-453 Cell Line
Breast carcinoma SUM 159 + 12hr 500nM JQ1 _vs_ DMSO_GPL18573	4	Chemical	JQ1	GSE63582	SUM159PT Cell Line
Breast carcinoma SUM 159 JQ1-resistant cells + 3hr 500nM JQ1 _vs_ DMSO_GPL11154	4	Chemical	JQ1	GSE63582	SUM159PT Cell Line
Breast epithelial MCF10A cells expressing control siRNA - 250nM JQ1 treated 3d _vs_ untreated	4	Chemical	JQ1	GSE72932	MCF 10A Cell Line
Bronchial airway epithelial cells treated with 100mM ethanol _vs_untreated	4	Chemical	Ethanol	GSE12253	Primary cells - cultured
Chronic meylogenous leukemia K-562 cells - 100nM Dasatinib 8hr _vs_ DMSO control	4	Chemical	dasatinib	GSE51083	K-562 Cell Line
Colorectal cancer HCT116 cells control siRNA - treated with 2mM butyrate for 3d _vs_ untreated	4	Chemical	Butyrate	GSE41113	HCT 116 Cell Line
Colorectal cancer HT 29 cell line treated 24hr with 0.5uM JQ1 _vs_ DMSO	4	Chemical	JQ1	GSE73318	HT 29 Cell Line
Diffuse intrinsic pontine glioma SF8628 cells treated for 12hr - 300nM JQ1 _vs_ DMSO controls	4	Chemical	JQ1	GSE78801	Cell line
Diffuse large B-cell lymphoma DHL6 cells + 500nM JQ1 for 24hr _vs_ vehicle (DMSO)	4	Chemical	JQ1	GSE45630	SU-DHL-6 Cell Line
Diffuse large B-cell lymphoma DHL6 cells + 500nM JQ1 for 6hr _vs_ vehicle (DMSO)	4	Chemical	JQ1	GSE45630	SU-DHL-6 Cell Line
Diffuse large B-cell lymphoma U-937 cells overexpressing EVI1 treated 24hr with 1uM ATRA _vs_ DMSO	4	Chemical	Retinoic acid	GSE66854	U-937 Cell Line
Diffuse_large B cell lymphoma OCI-LY3 cells + 0.31uM camptothecin for 6hr _vs_ untreated	4	Chemical	camptothecin	GSE51068	OCI-LY-3 Cell Line
Diffuse_large B cell lymphoma OCI-LY3 cells + 0.5uM cycloheximide for 6hr _vs_ untreated	4	Chemical	cycloheximide	GSE51068	OCI-LY-3 Cell Line
Embryonic H9 stem cell line - 0.1mM carbamazepine treated 1d _vs_ DMSO	4	Chemical	Carbamazepine	GSE64123	H9 Stem Cell Line
Embryonic kidney HEK293 cells expressing wt DDX3 - 0.5mM sodium arsenite for 45min _vs_ untreated	4	Chemical	sodium arsenite	GSE70803	Not annotated
Endometrial cancer SNG-II cells + 10X IC50 concentration of paclitaxel for 24hr _vs_ untreated	4	Chemical	Paclitaxel	GSE50832	SNG-II Cell Line
Gastric epithelial GES-1 cells 24hr after 1.5mM clopidogrel treatment _vs_ DMSO controls	4	Chemical	clopidogrel	GSE47591	GES-1 Cell Line
Glioblastoma U87 cells + IC50 concentration of cisplatin for 24hr _vs_ untreated	4	Chemical	Cisplatin	GSE66493	U-87 MG Cell Line
HCT116 tetraploid colon carcinoma cells treated 36hr with 1uM UCN-01 _vs_ untreated	4	Chemical	7-hydroxystaurosporine	E-TABM-172	HCT 116 Cell Line
Hepatocellular carcinoma cell line HepG2 10uM 5-aza-dCyd treated for 5d _vs_ untreated	4	Chemical	5-azacytidine	GSE35311	Hep G2 Cell Line
Hepatocellular carcinoma HepG2 cells + 72hr 45uM IC10 piperonylbutoxide _vs_ 0.5% DMSO	4	Chemical	Piperonyl Butoxide	GSE40117	Hep G2 Cell Line
Hepatocellular carcinoma HepG2 cells + non-hepatotoxic compounds for 24hr _vs_ vehicle (DMSO)	4	Chemical	non-hepatotoxic compounds	GSE51952	Hep G2 Cell Line
Hepatocellular carcinoma HuH-7 cells treated with SAHA (Vorinostat) _vs_ DMSO control	4	Chemical	vorinostat	GSE52232	HuH-7 Cell Line
Hepatocytes of female donors treated 24hr with 10000uM isoniazid _vs_ 0uM	4	Chemical	Isoniazid	TG-GATES	Primary cells - cultured
Hepatocytes of female donors treated 24hr with 400uM moxisylyte _vs_ 0uM	4	Chemical	Moxisylyte	TG-GATES	Primary cells - cultured
Hepatocytes of female donors treated 24hr with 70uM rifampicin _vs_ 0uM	4	Chemical	Rifampin	TG-GATES	Primary cells - cultured
Hepatoma Huh7.5.1 cells treated 24hr with 100ug/mL ribavirin _vs_ PBS	4	Chemical	Ribavirin	GSE23031	Cell line
HepG2 hepatocellular carcinoma cell line 250uM COU treated for 24hr _vs_ DMSO control	4	Chemical	Coumaphos	GSE28878	Hep G2 Cell Line
HepG2 hepatocellular carcinoma cell line 300uM 2CMP treated for 48hr _vs_ DMSO control	4	Chemical	pyridine hydrochloride	GSE28878	Hep G2 Cell Line
HepG2 hepatocellular carcinoma cell line 500uM EuG treated for 48hr _vs_ DMSO control	4	Chemical	Eugenol	GSE28878	Hep G2 Cell Line
HL60 cells + alvespimycin, 0.1uM _vs_ DMSO vehicle	4	Chemical	alvespimycin	GSE5258	HL-60 Cell Line
HL60 cells + clorgiline, 13uM _vs_ DMSO vehicle	4	Chemical	Clorgyline	GSE5258	HL-60 Cell Line
HL60 cells + nimodipine, 9.6uM _vs_ DMSO vehicle	4	Chemical	Nimodipine	GSE5258	HL-60 Cell Line
Hodgkins lymphoma HDLM-2 cell line - 5uM sorafenib treated 24hr _vs_ vehicle control	4	Chemical	sorafenib	GSE31060	HDLM-2 Cell Line
HT29 colon adenocarcinoma cells treated 12hr with 10nM apratoxin A _vs_ EtOH vehicle	4	Chemical	apratoxin A	GSE2742	HT 29 Cell Line
Human umbilical vein endothelial cells treated 24hr with 2uM angiogenesis inhibitor 17a _vs_ DMSO	4	Chemical	17a	GSE75588	Primary cells - cultured
Ishikawa cells + 1uM 17-alpha-estradiol 48hr _vs_ vehicle control	4	Chemical	17a-estradiol	GSE11869	Ishikawa Cell Line
Jurkat T-cells 6hr post 10uM Ochratoxin A S9 treatment _vs_ untreated	4	Chemical	ochratoxin A	GSE46909	Jurkat Cell Line
Lung cancer A549 cells treated for 1wk - 5% cigarette smoke extract _vs_ untreated controls	4	Chemical	Tobacco smoke	GSE77942	A549 Cell Line
Lung cancer A549 cells treated with Tamarind seed polysaccharide PST001 _vs_ untreated	4	Chemical	Polysaccharides	GSE41598	A549 Cell Line
Lymphoblastoid AH LCL cells - 2.5uM SAHA treated for 60min _vs_ untreated	4	Chemical	vorinostat	GSE65297	Cell line
Lymphoblastoid TK6 cells 10Jm2 UVC-irradiated - 8hr 1nM TPA-treated _vs_ 8hr DMSO	4	Chemical	phorbolol myristate acetate	GSE71521	TK6 Cell Line
MCF7 cells + 5253409, 17uM _vs_ DMSO vehicle	4	Chemical	5253409	GSE5258	MCF7 Cell Line
MCF7 cells + acacetin, 14uM _vs_ DMSO vehicle	4	Chemical	acacetin	GSE5258	MCF7 Cell Line
MCF7 cells + benfluorex, 10.4uM _vs_ DMSO vehicle	4	Chemical	benfluorex	GSE5258	MCF7 Cell Line
MCF7 cells + camptothecin, 11.4uM _vs_ DMSO vehicle	4	Chemical	Camptothecin	GSE5258	MCF7 Cell Line
MCF7 cells + digitoxigenin, 10.6uM _vs_ DMSO vehicle	4	Chemical	Digitoxigenin	GSE5258	MCF7 Cell Line
MCF7 cells + equilin, 15uM _vs_ DMSO vehicle	4	Chemical	Equilin	GSE5258	MCF7 Cell Line
MCF7 cells + fenbendazole, 13.4uM _vs_ DMSO vehicle	4	Chemical	Fenbendazole	GSE5258	MCF7 Cell Line
MCF7 cells + levonorgestrel, 12.8uM _vs_ DMSO vehicle	4	Chemical	Levonorgestrel	GSE5258	MCF7 Cell Line
MDA-MB-231 cells expressing DNA binding domain mutant ER + 10nM estradiol at 4hr _vs_ untreated	4	Chemical	Estradiol	GSE22593	MDA-MB-231 Cell Line
MDA-MB-436 breast cancer cells treated 7d with 100nM AG014699 _vs_ DMSO	4	Chemical	AG 014699	GSE34817	MDA-MB-436 Cell Line
Melanoma A375 cells treated 24hr with 10uM vemurafenib _vs_ DMSO vehicle	4	Chemical	vemurafenib	GSE42872	A-375 Cell Line
Melanoma A375 cells treated for 72hr with 25uM A771726 _vs_ DMSO control	4	Chemical	A 771726	GSE68039	A-375 Cell Line
Melanoma A375 cells treated with 25uM A771726 for 12hr _vs_ 0hr	4	Chemical	A 771726	GSE68039	A-375 Cell Line
MM.1S multiple myeloma cells - 500nM JQ1 3hr _vs_ untreated	4	Chemical	JQ1	GSE44929	MM.1S Cell Line
MM.1S multiple myeloma cells - 500nM JQ1 6hr _vs_ untreated	4	Chemical	JQ1	GSE44929	MM.1S Cell Line
Multiple myeloma MM.1S cells treated 24hr with 20nM JP11646 _vs_ untreated controls	4	Chemical	JP11646	GSE89812	MM.1S Cell Line
N/Tert-1 foreskin keratinocytes expressing HPV 92E6 + 2ug/ml mitomycin C 18hr _vs_ H2O ctrl	4	Chemical	Mitomycin	GSE50568	Cell line
N/Tert-1 foreskin keratinocytes with empty vector + 2ug/ml mitomycin C 18hr _vs_ H2O ctrl	4	Chemical	Mitomycin	GSE50568	Cell line
Nasal epithelial cells incubated 4hr with 200uM formaldehyde _vs_ 4hr untreated	4	Chemical	formalin	GSE21477	Primary cells - cultured
Non-small cell lung cancer HCC4006 cells EGFR mutant + 1mM EGFR inhibitor erlotinib 24hr _vs_ DMSO	4	Chemical	erlotinib	GSE57156	HCC4006 Cell Line
Ovarian cancer COV362 cells + 10X IC50 concentration of eribulin for 24hr _vs_ untreated	4	Chemical	eribulin	GSE50832	COV362 Cell Line
Pancreatic ductal adenocarcinoma 1108 cells 5hr with 1.6uM CPI203 _vs_ untreated controls	4	Chemical	CPI203	GSE55209	Cell line
PBMCs from relapsing-remitting MS patients with ICSBP1 allele 13 + glatiramer acetate _vs_ untreated	4	Chemical	copolymer 1	GSE16214	Blood fraction
PC3 cells + ciclosporin, 3.4uM _vs_ DMSO vehicle	4	Chemical	Cyclosporine	GSE5258	PC-3 Cell Line [prostate cancer]
PC3 cells + cyproheptadine, 12.4uM _vs_ DMSO vehicle	4	Chemical	Cyproheptadine	GSE5258	PC-3 Cell Line [prostate cancer]
PC3 cells + fenbendazole, 13.4uM _vs_ DMSO vehicle	4	Chemical	Fenbendazole	GSE5258	PC-3 Cell Line [prostate cancer]
PC3 cells + fludrocortisone, 9.4uM _vs_ DMSO vehicle	4	Chemical	Fludrocortisone	GSE5258	PC-3 Cell Line [prostate cancer]
PC3 cells + flunisolide, 9.2uM _vs_ DMSO vehicle	4	Chemical	flunisolide	GSE5258	PC-3 Cell Line [prostate cancer]
PC3 cells + methylprednisolone, 10.6uM _vs_ DMSO vehicle	4	Chemical	Methylprednisolone	GSE5258	PC-3 Cell Line [prostate cancer]
PC3 cells + triamterene, 15.8uM _vs_ DMSO vehicle	4	Chemical	Triamterene	GSE5258	PC-3 Cell Line [prostate cancer]
Plasmacytoma NCI-H929 cells input RNA - treated with 25uM melphalan _vs_ untreated	4	Chemical	Melphalan	GSE83662	NCI-H929 Cell Line
Primary hepatocytes + 400uM gatifloxacin for 24hr _vs_ control	4	Chemical	gatifloxacin	GSE9166	Primary cells
Prostate adenocarcinoma LNCaP cells treated 24hr with 0.5uM GSK525762A _vs_ DMSO vehicle	4	Chemical	GSK525762A	GSE56352	LNCaP Cell Line
Psoriasiform keratinocytes treated 24hr with 0.1ug/mL all trans retinoic acid _vs_ vehicle	4	Chemical	Retinoic acid	GSE79642	Primary cells - cultured
SiHa cells + DAC + trichostatin A _vs_ untreated	4	Chemical	Trichostatin A	GSE2097	SiHa Cell Line
A2780 ovarian cancer cells + oxaliplatin IC75 2hr then cultured drug-free 16hr _vs_ untreated 16hr	3.69897	Chemical	oxaliplatin	GSE8057	A2780 Cell Line
A673 EWS-FLI translocated Ewing sarcoma cell line + 0.34uM (2xEC50) cytarabine 24hr _vs_ DMSO	3.69897	Chemical	Cytarabine	GSE6930	A-673 Cell Line
Activated peripheral blood T cells + H202 96hr _vs_ 0hr	3.69897	Chemical	Hydrogen peroxide	GSE6607	Blood fraction
Acute myelomonocytic leukemia xenografts from spleen + 1d 2.5mg/kg LY2510924 _vs_ untreated	3.69897	Chemical	CXCR4 Peptide Antagonist LY2510924	GSE64623	Xenograft
AML MOLM-13 cells with GFP sgRNA treated 24hr with 50nM JQ1 _vs_ DMSO	3.69897	Chemical	JQ1	GSE80774	MOLM-13 Cell Line
B-cell lymphoma cell line - mitomycin C treated for 24hr _vs_ DMSO control	3.69897	Chemical	Mitomycin	GSE60408	B-cell lymphoma
B-cell lymphoma cell line - mitoxantrone hydrochloride treated for 24hr _vs_ DMSO control	3.69897	Chemical	mitoxantrone hydrochloride	GSE60408	B-cell lymphoma
B-cell lymphoma cell line - topotecan hydrochloride treated for 24hr _vs_ DMSO control	3.69897	Chemical	topotecan hydrochloride	GSE60408	B-cell lymphoma
Breast cancer cell line ZR-75-1 treated 36hr with doxorubicin _vs_ untreated	3.69897	Chemical	Doxorubicin	GSE1647	ZR-75-1 Cell Line
Breast cancer MCF7 cells + 12hr 10uM Narciclasine _vs_ DMSO	3.69897	Chemical	narciclasine	GSE85871	MCF7 Cell Line
Breast cancer MCF7 cells after 24hr - treated with 10ug/mL fluorouracil _vs_ untreated controls	3.69897	Chemical	Fluorouracil	GSE78512	MCF7 Cell Line
Breast cancer MCF7 cells overexpressing HER2 - 50nM LBH589 treated 24hr _vs_ DMSO treated	3.69897	Chemical	LBH589	GSE36509	MCF7 Cell Line
Breast cancer MDA-MB-231 cells re-expressing ERalpha then treated with estradiol _vs_ vehicle	3.69897	Chemical	Estradiol	GSE2251	MDA-MB-231 Cell Line
Breast cancer UACC-812 cells + 10X IC50 concentration of paclitaxel for 24hr _vs_ untreated	3.69897	Chemical	Paclitaxel	GSE50832	UACC812 Cell Line
Breast cancer UACC-893 cells + 10X IC50 concentration of paclitaxel for 24hr _vs_ untreated	3.69897	Chemical	Paclitaxel	GSE50832	UACC893 Cell Line
Breast duct carcinoma T-47D cells overexpressing RARA403 MUT for 72hr - 1uM RA _vs_ ethanol controls	3.69897	Chemical	Retinoic acid	GSE57119	T-47D Cell Line
Breast duct carcinoma T-47D cells treated 24hr with 1uM MK2206 _vs_ untreated	3.69897	Chemical	MK 2206	GSE80591	T-47D Cell Line
CML CD34+ bone marrow cultured under 21% oxygen and treated 24hr with 2uM imatinib _vs_ 24hr DMSO	3.69897	Chemical	imatinib	GSE48294	Primary cells - cultured
Colorectal cancer HCT 116 cells after GLI1 siRNA knockdown + 4hr 2.5uM vorinostat _vs_ 4hr DMSO	3.69897	Chemical	vorinostat	GSE57871	HCT 116 Cell Line
Colorectal cancer HCT 15 cell line treated 24hr with 0.5uM JQ1 _vs_ DMSO	3.69897	Chemical	JQ1	GSE73318	HCT-15 Cell Line
Colorectal cancer HCT116 cells with P53 knockout - 2mg/mL tunicamycin treated 24hr _vs_ untreated	3.69897	Chemical	Tunicamycin	GSE63252	HCT 116 Cell Line
Colorectal cancer SW 480 cell line treated 24hr with 0.5uM JQ1 _vs_ DMSO	3.69897	Chemical	JQ1	GSE73318	SW 480 Cell Line
Colorectal cancer SW620 cells + 200uM 5-fluorouracil for 24hr _vs_ untreated	3.69897	Chemical	5-Fluorouracil	GSE53617	SW 620 Cell Line
CRC YB5 cells with 20nM romidepsin for 24hr _vs_ untreated controls	3.69897	Chemical	romidepsin	GSE73966	Cell line
DHL4 diffuse large B-cell lymphoma cells 6hr treated - SYK inhibitor R406 _vs_ DMSO	3.69897	Chemical	R 406 cpd	GSE43510	DHL-4 Cell Line
DHL6 diffuse large B-cell lymphoma cells 6hr treated - SYK inhibitor R406 _vs_ DMSO	3.69897	Chemical	R 406 cpd	GSE43510	Cell line
Diffuse_large B cell lymphoma OCI-LY3 cells + 0.812uM etoposide for 6hr _vs_ untreated	3.69897	Chemical	etoposide	GSE51068	OCI-LY-3 Cell Line
Diffuse_large B cell lymphoma OCI-LY3 cells + 100uM blebbistatin for 24hr _vs_ untreated	3.69897	Chemical	blebbistatin	GSE51068	OCI-LY-3 Cell Line
Endometrial adenocarcinoma Ishikawa cells treated 48hr with 1uM Genistein _vs_ 48hr vehicle	3.69897	Chemical	Genistein	GSE71717	Ishikawa Cell Line
Endothelial HUVEC cells treated 1hr with 1uM GSK525762A BRD inhibitor _vs_ DMSO	3.69897	Chemical	GSK525762A	GSE86577	HUVECs
ESCs H9 (clone 2) activated STAT3-ERT2 and LIF treated - Chir99021 PD0325901 treated _vs_ untreated	3.69897	Chemical	Chir 99021	GSE55708	H9 Stem Cell Line
Fibroblast cells of healthy controls - 75uM resveratrol 72hr _vs_ DMSO	3.69897	Chemical	resveratrol	GSE65634	Cell line
Fibroblasts from normal subjects treated 4d with 100mM trehalose _vs_ untreated controls	3.69897	Chemical	Trehalose	GSE76643	Primary cells - cultured
H1975 non-small lung cancer cells treated 48hr with BMS-690514 _vs_ untreated	3.69897	Chemical	BMS-690514	E-TABM-239	NCI-H1975 Cell Line
HCC Hep G2 cells treated for 12hr - 12.5uM nefazodone _vs_ DMSO controls	3.69897	Chemical	nefazodone	GSE10200	Hep G2 Cell Line
HCT 116 p53 KO cells treated with 10nM actinomycin D _vs_ untreated	3.69897	Chemical	Actinomycin D	GSE12459	HCT 116 Cell Line
HCT-116 colon cancer cells (wildtype p53) treated 24hr with Danusertib _vs_ untreated	3.69897	Chemical	PHA 739358	GSE24547	HCT 116 Cell Line
HCT116 colon cancer cells + H2O2 24hr _vs_ untreated control	3.69897	Chemical	Hydrogen peroxide	GSE3176	HCT 116 Cell Line
HCT116 colorectal cancer cells - Decitabine prodrug-G668684 (7uM) treated 72hr _vs_ DMSO control	3.69897	Chemical	Decitabine prodrug-G668684	GSE30985	HCT 116 Cell Line
HeLa cervical cancer cells + 100uM desoxiferamine for 12hr _vs_ DMSO control 12hr	3.69897	Chemical	Deferoxamine mesylate	GSE16870	HeLa Cell Line
Hepatocellular carcinoma HepaRG cells - 0.22mM 5 NC 4-acetylaminofluorene 24hr _vs_ DMSO control	3.69897	Chemical	4-acetylaminofluorene	GSE48990	HepaRG Cell Line
Hepatocellular carcinoma HepG2 cells + 20uM cisplatin for 24hr _vs_ vehicle (PBS)	3.69897	Chemical	Cisplatin	GSE51952	Hep G2 Cell Line
Hepatocellular carcinoma HepG2 cells + 72hr 1.6uM IC10 aflatoxin B1 _vs_ 0.5% DMSO	3.69897	Chemical	Aflatoxin B1	GSE40117	Hep G2 Cell Line
Hepatocytes in culture - 100uM echimidine treated 24hr _vs_ acetonitrile control	3.69897	Chemical	echimidine	GSE69269	Primary cells - cultured
Hepatocytes of female donors treated 24hr with 1200uM iproniazid _vs_ 0uM	3.69897	Chemical	Iproniazid	TG-GATES	Primary cells - cultured
Hepatocytes of female donors treated 24hr with 400uM phenylbutazone _vs_ 0uM	3.69897	Chemical	Phenylbutazone	TG-GATES	Primary cells - cultured
Hepatocytes of female donors treated 24hr with 60uM papaverine _vs_ 0uM	3.69897	Chemical	Papaverine	TG-GATES	Primary cells - cultured
Hepatocytes of female donors treated 2hr with 15uM ketoconazole _vs_ 0uM	3.69897	Chemical	Ketoconazole	TG-GATES	Primary cells - cultured
Hepatocytes of female donors treated 8hr with 10000uM phenobarbital _vs_ 0uM	3.69897	Chemical	Phenobarbital	TG-GATES	Primary cells - cultured
Hepatocytes of female donors treated 8hr with 35uM promethazine _vs_ 0uM	3.69897	Chemical	Promethazine	TG-GATES	Primary cells - cultured
Hepatocytes of female donors treated 8hr with 50uM diazepam _vs_ 0uM	3.69897	Chemical	Diazepam	TG-GATES	Primary cells - cultured
Hepatocytes of female donors treated 8hr with 50uM flutamide _vs_ 0uM	3.69897	Chemical	Flutamide	TG-GATES	Primary cells - cultured
Hepatocytes of male donors treated 8hr with 10000uM methimazole _vs_ 0uM	3.69897	Chemical	Methimazole	TG-GATES	Primary cells - cultured
Hepatoma cell line Huh7 side population 100uM Zebularine 72hr treated _vs_ untreated	3.69897	Chemical	pyrimidin-2-one beta-ribofuranoside	GSE24520	HuH-7 Cell Line
HepG2 hepatocellular carcinoma cell line 10mM DEHP treated for 24hr _vs_ DMSO control	3.69897	Chemical	Diethylhexyl Phthalate	GSE28878	Hep G2 Cell Line
HepG2 hepatocellular carcinoma cell line 6uM Prog treated for 24hr _vs_ EtOH control	3.69897	Chemical	Progesterone	GSE28878	Hep G2 Cell Line
HepG2 hepatoma cells treated (test center 3) 24hr with 3mM BaP _vs_ DMSO	3.69897	Chemical	Benzo(a)pyrene	GSE25936	Hep G2 Cell Line
HL60 cells + anisomycin, 15uM _vs_ DMSO vehicle	3.69897	Chemical	Anisomycin	GSE5258	HL-60 Cell Line
HL60 cells + flunisolide, 9.2uM _vs_ DMSO vehicle	3.69897	Chemical	flunisolide	GSE5258	HL-60 Cell Line
HL60 cells + fluorometholone, 10.6uM _vs_ DMSO vehicle	3.69897	Chemical	Fluorometholone	GSE5258	HL-60 Cell Line
HL60 cells + lycorine, 12.4uM _vs_ DMSO vehicle	3.69897	Chemical	lycorine	GSE5258	HL-60 Cell Line
HL60 cells + methylbenzethonium chloride, 8.6uM _vs_ DMSO vehicle	3.69897	Chemical	methylbenzethonium	GSE5258	HL-60 Cell Line
HL60 cells + methylergometrine, 8.8uM _vs_ DMSO vehicle	3.69897	Chemical	Methylergonovine	GSE5258	HL-60 Cell Line
HL60 cells + noretynodrel, 13.4uM _vs_ DMSO vehicle	3.69897	Chemical	Norethynodrel	GSE5258	HL-60 Cell Line
HL60 cells + Prestwick-983, 17uM _vs_ DMSO vehicle	3.69897	Chemical	Prestwick-983	GSE5258	HL-60 Cell Line
HT-1080 cells glucose starved _vs_ untreated control	3.69897	Chemical	Glucose	GSE16157	HT 1080 Cell Line
HT29 colon adenocarcinoma cells treated 12hr with H2O2 _vs_ EtOH vehicle	3.69897	Chemical	Hydrogen peroxide	GSE2742	HT 29 Cell Line
Huh7 cells + 5uM NIM811 cultured for 12hr _vs_ untreated	3.69897	Chemical	(melle-4)cyclosporin	GSE15935	HuH-7 Cell Line
Immature dendritic cell monocyte derived + 1,25-vitD _vs_ vehicle control	3.69897	Chemical	Vitamin D	GSE13762	Primary cells - cultured
JJN-3 cells 2.5uM 5-Azacytidine treated 24hr then 10uM panobinostat treated 4hr _vs_ untreated	3.69897	Chemical	panobinostat	GSE56623	JJN-3 Cell Line
Lung cancer PC-1 cells 24hr with 1uM erlotinib _vs_ DMSO	3.69897	Chemical	erlotinib	GSE10075	PC-9 Cell Line
Lung fibroblasts menadione 1hr _vs_ menadione 0hr	3.69897	Chemical	menadione	GSE4301	Lung fibroblasts
Macrophages induced from monocytes then stimulated 18hr with 5ug/ml conA _vs_ untreated controls	3.69897	Chemical	Concanavalin A	GSE30273	Primary cells - cultured
Malignant melanoma A375 cells uninduced HSF1 shRNA - 100nM HSP990 3hr _vs_ DMSO treatment	3.69897	Chemical	HSP990	GSE44867	A-375 Cell Line
Mammary gland MCF12A cells treated 4d with 5uM AZA _vs_ DMSO	3.69897	Chemical	decitabine	GSE71363	MCF-12A Cell Line
Mammary luminal epithelial cells treated 24hr with doxorubicin _vs_ media alone	3.69897	Chemical	Doxorubicin	GSE763	MCF7 Cell Line
MCF10A epithelial cells PIK3CA activating mutant - GDC-0941 treated 4hr _vs_ DMSO control	3.69897	Chemical	2-(1H-indazol-4-yl)-6-(4-methanesulfonylpiperazin-1-ylmethyl)-4-morpholin-4-ylthieno(3,2-d)pyrimidine	GSE17785	MCF 10A Cell Line
MCF7 breast cancer cells STAT3 shRNA for 4hr - 10uM nutlin3a treated _vs_ untreated	3.69897	Chemical	nutlin 3	GSE30183	MCF7 Cell Line
MCF7 cells + 0175029-0000, 1uM _vs_ DMSO vehicle	3.69897	Chemical	0175029-0000	GSE5258	MCF7 Cell Line
MCF7 cells + 10hr 1.5uM doxorubicin _vs_ vehicle	3.69897	Chemical	Doxorubicin	GSE24065	MCF7 Cell Line
MCF7 cells + alvespimycin, 0.1uM _vs_ DMSO vehicle	3.69897	Chemical	alvespimycin	GSE5258	MCF7 Cell Line
MCF7 cells + bromocriptine, 5.4uM _vs_ DMSO vehicle	3.69897	Chemical	Bromocriptine	GSE5258	MCF7 Cell Line
MCF7 cells + clofazimine, 8.4uM _vs_ DMSO vehicle	3.69897	Chemical	Clofazimine	GSE5258	MCF7 Cell Line
MCF7 cells + clomipramine, 11.4uM _vs_ DMSO vehicle	3.69897	Chemical	Clomipramine	GSE5258	MCF7 Cell Line
MCF7 cells + ethoxyquin, 18.4uM _vs_ DMSO vehicle	3.69897	Chemical	Ethoxyquin	GSE5258	MCF7 Cell Line
MCF7 cells + eticlopride, 10.6uM _vs_ DMSO vehicle	3.69897	Chemical	eticlopride	GSE5258	MCF7 Cell Line
MCF7 cells + etoposide, 6.8uM _vs_ DMSO vehicle	3.69897	Chemical	Etoposide	GSE5258	MCF7 Cell Line
MCF7 cells + etynodiol, 10.4uM _vs_ DMSO vehicle	3.69897	Chemical	Ethynodiol Diacetate	GSE5258	MCF7 Cell Line
MCF7 cells + flunarizine, 8.4uM _vs_ DMSO vehicle	3.69897	Chemical	Flunarizine	GSE5258	MCF7 Cell Line
MCF7 cells + idazoxan, 16.6uM _vs_ DMSO vehicle	3.69897	Chemical	Idazoxan	GSE5258	MCF7 Cell Line
MCF7 cells + phenazopyridine, 16uM _vs_ DMSO vehicle	3.69897	Chemical	Phenazopyridine	GSE5258	MCF7 Cell Line
MCF7 cells + quercetin, 11.8uM _vs_ DMSO vehicle	3.69897	Chemical	Quercetin	GSE5258	MCF7 Cell Line
MCF7 cells + trichostatin A, 1uM _vs_ DMSO vehicle	3.69897	Chemical	trichostatin A	GSE5258	MCF7 Cell Line
Meibomian gland epithelial cells in proliferation medium + 2uM retinoic acid 4d _vs_ no RA	3.69897	Chemical	Retinoic acid	GSE37089	Primary cells - cultured
Melanoma A375 cells treated with 25uM A771726 for 24hr _vs_ 0hr	3.69897	Chemical	A 771726	GSE68039	A-375 Cell Line
Melanoma cells + 24hr 10nM GSK1120212 _vs_ DMSO controls	3.69897	Chemical	Trametinib	GSE35230	A-375 Cell Line
Melanoma Me23682 cells Apollon siRNA for 24hr then 150nM fotemustine treated 6hr _vs_ untreated	3.69897	Chemical	fotemustine	GSE34686	Cell line
MM.1S multiple myeloma cells - 50nM JQ1 6hr _vs_ DMSO	3.69897	Chemical	JQ1	GSE44929	MM.1S Cell Line
Monocytes from blood + 6hr 30mg/mL Zostavax _vs_ media_GPL10558	3.69897	Chemical	Zostavax	GSE44722	Primary cells - cultured
Multiple myeloma cell lines treated with darinaparsin 24hr _vs_ control	3.69897	Chemical	S-(dimethylarsino)-glutathione	GSE14519	Cell line
Multiple myeloma IM-9 cells treated 24hr with BRD4 inhibitor AZD5153 _vs_ DMSO control	3.69897	Chemical	AZD5153	GSE85840	IM-9 Cell Line
Neuroblastoma SH-SY5Y cells - 10uM RA + enriched NB medium differentiated _vs_ undifferentiated	3.69897	Chemical	RA	GSE77383	SH-SY5Y Cell Line
Non-small cell lung cancer cell line A549 + 1uM azacitidine for 48hr _vs_ control	3.69897	Chemical	azacitidine	GSE29077	A549 Cell Line
Osteosarcoma U-2 OS cells in asynchronous phase treated 8hr with 10uM nutlin _vs_ DMSO vehicle	3.69897	Chemical	nutlin-3A	GSE87668	U-2 OS Cell Line
Ovarian cancer SK-OV-3 cells + 5uM dorsomorphin + 100ng/ml rBMP2 24hr _vs_ rBMP2 only	3.69897	Chemical	dorsomorphin	GSE60135	SK-OV-3 Cell Line
Ovarian cancer SK-OV-3 cells IRF-1 shRNA - CDDP treated 24hr _vs_ untreated	3.69897	Chemical	CDDP	GSE38551	SK-OV-3 Cell Line
Pancreatic carcinoma MIAPaCa-2 cells treated 3hr with 0.5uM MS417 _vs_ DMSO	3.69897	Chemical	MS417	GSE89932	MIA PaCa-2 Cell Line
Pancreatic ductal adenocarcinoma COLO-357 cells + 72hr PD 0332991 _vs_ untreated controls	3.69897	Chemical	PD 0332991	GSE39646	COLO 357 Cell Line
PBMCs of healthy volunteers - Pam3Cys stimulated 24hr _vs_ RPMI stimulated	3.69897	Chemical	2,3-bis(palmitoyloxy)-2-propyl-1-palmitoylcysteine	GSE68765	Blood fraction
PC3 cells + chloropyramine, 12.2uM _vs_ DMSO vehicle	3.69897	Chemical	chloropyramine	GSE5258	PC-3 Cell Line [prostate cancer]
PC3 cells + cinchonidine, 13.6uM _vs_ DMSO vehicle	3.69897	Chemical	cinchonidine	GSE5258	PC-3 Cell Line [prostate cancer]
PC3 cells + domperidone, 7.4uM _vs_ DMSO vehicle	3.69897	Chemical	Domperidone	GSE5258	PC-3 Cell Line [prostate cancer]
PC3 cells + emetine, 7.2uM _vs_ DMSO vehicle	3.69897	Chemical	Emetine	GSE5258	PC-3 Cell Line [prostate cancer]
PC3 cells + hexestrol, 14.8uM _vs_ DMSO vehicle	3.69897	Chemical	Hexestrol	GSE5258	PC-3 Cell Line [prostate cancer]
PC3 cells + simvastatin, 9.6uM _vs_ DMSO vehicle	3.69897	Chemical	Simvastatin	GSE5258	PC-3 Cell Line [prostate cancer]
Peripheral nerve sheath tumor 90-8 cells 24hr with 100nM INK-128 _vs_ DMSO controls	3.69897	Chemical	INK-128	GSE84205	Cell line
Plasma cell leukemia JJN-3 cells with non-silencing shRNA - 10hr with 25uM melphalan _vs_ untreated	3.69897	Chemical	Melphalan	GSE83712	JJN-3 Cell Line
Primary hepatocytes + 400uM trovafloxacin for 24hr _vs_ control	3.69897	Chemical	trovafloxacin	GSE9166	Primary cells
Prostate cancer LNCaP cells expressing SH3YL1 shRNA - 10nM R1881 treated 72hr _vs_ 24hr	3.69897	Chemical	R1881	GSE64885	LNCaP Cell Line
Ramos B lymphoma cells treated 4hr with 10uM MGd _vs_ mannitol control	3.69897	Chemical	motexafin gadolinium	GSE2964	RAMOS Cell Line
RWPE-1 cells + dihydroxyvitamin D3 6hr _vs_ vehicle control	3.69897	Chemical	Vitamin D	GSE15947	RWPE-1 Cell Line
SH-SY5Y-A cells + 10 uM Retinoic acid 5d _vs_ 0hr	3.69897	Chemical	Retinoic acid	GSE9169	SH-SY5Y Cell Line
Skin malignant melanoma 501-MEL cells treated 48hr with 20mM salubrinal _vs_ DMSO controls	3.69897	Chemical	salubrinal	GSE86806	501 MEL Cell Line
Skin malignant melanoma 501-MEL cells treated 72hr with 20mM salubrinal _vs_ DMSO controls	3.69897	Chemical	salubrinal	GSE86806	501 MEL Cell Line
T-ALL pooled cells lines treated 6hr at IC50 with AS605240 _vs_ vehicle_GPL570	3.69897	Chemical	AS 605240	GSE51001	Cell line
T-cell acute lymphoblastic leukemia MOLT-4 cells JQ1 treated 6hr _vs_ DMSO 6hr control	3.69897	Chemical	JQ1	GSE79253	MOLT-4 Cell Line
Tongue SCC-25 cells expressing GFP siRNA - 1uM doxorubicin treated 48hr _vs_ untreated	3.69897	Chemical	Doxorubicin	GSE58074	SCC-25 Cell Line
Acute lymphoid leukemia RS4-11 cells treated 24hr with 40nM AS1842856 _vs_ DMSO controls	3.52288	Chemical	AS 1842856	GSE86067	RS4-11 Cell Line
Acute promyelocytic leukemia HL60 cells 96hr with 100nM DEC + 10uM S2101 _vs_ untreated	3.52288	Chemical	decitabine	GSE78102	HL-60 Cell Line
B cell lymphoma KARPAS-422 cells treated 2d with 1uM (10x LCC) EPZ-6438 _vs_ 2d untreated	3.52288	Chemical	EPZ-6438	GSE49284	KARPAS-422 Cell Line
B cell lymphoma KARPAS-422 cells treated 4d with 1uM (10x LCC) EPZ-6438 _vs_ 4d untreated	3.52288	Chemical	EPZ-6438	GSE49284	KARPAS-422 Cell Line
B cell lymphoma KARPAS-422 cells treated 6d with 100nM (1x LCC) EPZ-6438 _vs_ 6d untreated	3.52288	Chemical	EPZ-6438	GSE49284	KARPAS-422 Cell Line
B-cell lymphoma cell line - teniposide treated for 24hr _vs_ DMSO control	3.52288	Chemical	teniposide	GSE60408	B-cell lymphoma
Breast cancer cells MCF-7 expressing ERB + 1uM genistein for 24hr _vs_ vehicle	3.52288	Chemical	Genistein	GSE56066	MCF7 Cell Line
Breast cancer MCF-7 cells + 10X IC50 concentration of eribulin for 24hr _vs_ untreated	3.52288	Chemical	eribulin	GSE50832	MCF7 Cell Line
Breast carcinoma SUM 159 JQ1-resistant cells + 24hr 500nM JQ1 _vs_ DMSO_GPL11154	3.52288	Chemical	JQ1	GSE63582	SUM159PT Cell Line
Breast squamous cell carcinoma HCC1806 cells - 6.4uM docetaxel treated 6hr _vs_ DMSO control	3.52288	Chemical	docetaxel	GSE70690	HCC1806 Cell Line
Bronchial epithelium exposed 6hr to 30uL mucosal PBS _vs_ unexposed	3.52288	Chemical	Miscellaneous	GSE10592	Primary cells - cultured
Cervical carcinoma BT20 cells + 6hr 10uM erlotinib _vs_ untreated controls	3.52288	Chemical	erlotinib	GSE30516	BT-20 Cell Line
Chronic lymhocytic leukemia B cells - 10uM fludarabine 4hr _vs_ untreated	3.52288	Chemical	fludarabine	GSE48258	Primary cells - cultured
Dermal fibroblasts 10ug/ml PolyIC treated 2hr _vs_ untreated control	3.52288	Chemical	Polynucleotides	GSE47616	Not annotated
Diffuse intrinsic pontine glioma SU-DIPG-IV cells treated for 3hr - 300nM JQ1 _vs_ DMSO controls	3.52288	Chemical	JQ1	GSE78801	Cell line
Diffuse intrinsic pontine glioma SU-DIPG-IV cells treated for 6hr - 300nM JQ1 _vs_ DMSO controls	3.52288	Chemical	JQ1	GSE78801	Cell line
Diffuse large B-cell lymphoma DHL6 cells + 500nM JQ1 for 12hr _vs_ vehicle (DMSO)	3.52288	Chemical	JQ1	GSE45630	SU-DHL-6 Cell Line
Diffuse_large B cell lymphoma OCI-LY3 cells + 0.03uM doxorubicin for 24hr _vs_ untreated	3.52288	Chemical	doxorubicin	GSE51068	OCI-LY-3 Cell Line
Diffuse_large B cell lymphoma OCI-LY3 cells + 2.56uM mitomycin D for 24hr _vs_ untreated	3.52288	Chemical	mitomycinD	GSE51068	OCI-LY-3 Cell Line
DMS-53 small cell lung carcinoma cell treated 24hr with 250uM desferrioxamine _vs_ untreated	3.52288	Chemical	Deferoxamine mesylate	GSE26920	DMS 53 Cell Line
Embryonic H9 stem cell line - 1mM valproic acid treated 7d _vs_ DMSO	3.52288	Chemical	Valproic Acid	GSE64123	H9 Stem Cell Line
Embryonic stem WA09 cells treated 48hr with 60mM NaCl _vs_ mock controls	3.52288	Chemical	Sodium Chloride	GSE90826	H9 Stem Cell Line
Endometrial cancer AN3 cells + 10X IC50 concentration of eribulin for 24hr _vs_ untreated	3.52288	Chemical	eribulin	GSE50832	AN3 CA Cell Line
Endothelial HUVEC cells treated 1hr with 5uM AX15839 ERK5 and BRD inhibitor _vs_ DMSO	3.52288	Chemical	AX15839	GSE86577	HUVECs
Esophagus cell line + 100uM deoxycholic acid in pH 4.5 acidic solution for 2h _vs_ untreated	3.52288	Chemical	Deoxycholic Acid	GSE9768	Cell line
Ewing's sarcoma of bone TC-71 cells treated 6hr with 25nM EWS-W _vs_ DMSO controls	3.52288	Chemical	EWS-W	GSE80640	TC-71 Cell Line
HCC Hep G2 cells treated for 24hr - 6uM trovafloxacin _vs_ DMSO controls	3.52288	Chemical	trovafloxacin	GSE10200	Hep G2 Cell Line
Hep G2 hepatocarcinoma cell line cultured for 24hr with 10nM benzo(a)pyrene _vs_ 0.5% DMSO	3.52288	Chemical	Benzo(a)pyrene	E-MEXP-2574	Hep G2 Cell Line
Hepatocellular carcinoma HepG2 cells + steatosis causing compounds for 24hr _vs_ non-hepatotoxic	3.52288	Chemical	steatosis causing compounds	GSE51952	Hep G2 Cell Line
Hepatocellular carcinoma HepG2 cells 2uM benzo(a)pyrene treated 24hr _vs_ DMSO vehicle controls	3.52288	Chemical	Benzo(a)pyrene	GSE36243	Hep G2 Cell Line
Hepatocytes in culture - 100uM senecionine treated 24hr _vs_ acetonitrile control	3.52288	Chemical	senecionine	GSE69269	Primary cells - cultured
Hepatocytes of female donors treated 24hr with 500uM furosemide _vs_ 0uM	3.52288	Chemical	Furosemide	TG-GATES	Primary cells - cultured
Hepatocytes of female donors treated 8hr with 12uM papaverine _vs_ 0uM	3.52288	Chemical	Papaverine	TG-GATES	Primary cells - cultured
Hepatocytes of female donors treated 8hr with 150uM mefenamic acid _vs_ 0uM	3.52288	Chemical	Mefenamic Acid	TG-GATES	Primary cells - cultured
Hepatocytes of female donors treated 8hr with 66uM etoposide _vs_ 0uM	3.52288	Chemical	Etoposide	TG-GATES	Primary cells - cultured
HepG2 hepatocellular carcinoma cell line 15uM 8HQ treated for 24hr _vs_ DMSO control	3.52288	Chemical	Oxyquinoline	GSE28878	Hep G2 Cell Line
HL60 cells + etiocholanolone, 13.8uM _vs_ DMSO vehicle	3.52288	Chemical	Etiocholanolone	GSE5258	HL-60 Cell Line
HL60 cells + lanatoside C, 4uM _vs_ DMSO vehicle	3.52288	Chemical	lanatoside C	GSE5258	HL-60 Cell Line
HL60 cells + luteolin, 14uM _vs_ DMSO vehicle	3.52288	Chemical	Luteolin	GSE5258	HL-60 Cell Line
HL60 cells + progesterone, 12.8uM _vs_ DMSO vehicle	3.52288	Chemical	Progesterone	GSE5258	HL-60 Cell Line
HL60 cells + proguanil, 13.8uM _vs_ DMSO vehicle	3.52288	Chemical	Proguanil	GSE5258	HL-60 Cell Line
HL60 cells + trimethylcolchicinic acid, 11.6uM _vs_ DMSO vehicle	3.52288	Chemical	trimethylcolchicinic acid	GSE5258	HL-60 Cell Line
Hodgkins lymphoma HDLM-2 cell line - 100nM givinostat treated 24hr _vs_ vehicle control	3.52288	Chemical	givinostat	GSE31060	HDLM-2 Cell Line
HT-1080 cells + 2-deoxyglucose stress and 10ng_ml antimycinA 18hr _vs_ untreated control	3.52288	Chemical	Antimycin A	GSE16157	HT 1080 Cell Line
JJN-3 cells 10uM panobinostat treated 24hr _vs_ untreated	3.52288	Chemical	panobinostat	GSE56623	JJN-3 Cell Line
JJN-3 cells 10uM panobinostat treated 4hr _vs_ untreated	3.52288	Chemical	panobinostat	GSE56623	JJN-3 Cell Line
Leukemia K562 cells expressing C-EBPa-ER fusion construct - 1uM estradiol for 6hr _vs_ vehicle	3.52288	Chemical	Estradiol	GSE43998	K-562 Cell Line
Lung fibroblasts of IPF patients for 24hr - 5uM 5-azacytidine treated _vs_ untreated controls	3.52288	Chemical	Azacitidine	GSE69764	Primary cells - cultured
Lung fibroblasts pretreatment 10ng/ml IL-13 for 24hr - 10ug/cm2 CBNP for 48hr _vs_ vehicle	3.52288	Chemical	Carbon Black	GSE43515	Primary cells - cultured
LY7 diffuse large B-cell lymphoma cells 24hr treated - SYK inhibitor R406 _vs_ DMSO	3.52288	Chemical	R 406 cpd	GSE43510	Cell line
LY7 diffuse large B-cell lymphoma cells 6hr treated - SYK inhibitor R406 _vs_ DMSO	3.52288	Chemical	R 406 cpd	GSE43510	Cell line
Lymphoblastoid AH LCL cells - 2.5uM SAHA treated for 30min _vs_ untreated	3.52288	Chemical	vorinostat	GSE65297	Cell line
Mantle cell lymphoma JVM-2 cells with TP53 shRNA - 100nM KPT-185 for 18hr _vs_ untreated	3.52288	Chemical	KPT-185	GSE70479	JVM-2 Cell Line
MCF7 breast cancer cells treated 6hr with 5x IC50 of topo I inhibitor SN38 _vs_ untreated	3.52288	Chemical	irinotecan	GSE18552	MCF7 Cell Line
MCF7 cells + azathioprine, 14.4uM _vs_ DMSO vehicle	3.52288	Chemical	Azathioprine	GSE5258	MCF7 Cell Line
MCF7 cells + benzamil, 11.2uM _vs_ DMSO vehicle	3.52288	Chemical	benzamil	GSE5258	MCF7 Cell Line
MCF7 cells + CP-690334-01, 10uM _vs_ DMSO vehicle	3.52288	Chemical	CP-690334-01	GSE5258	MCF7 Cell Line
MCF7 cells + HC toxin, 0.1uM _vs_ DMSO vehicle	3.52288	Chemical	HC toxin	GSE5258	MCF7 Cell Line
MCF7 cells + LY-294002, 10uM _vs_ DMSO vehicle	3.52288	Chemical	LY 294002	GSE5258	MCF7 Cell Line
MCF7 cells + mebendazole, 13.6uM _vs_ DMSO vehicle	3.52288	Chemical	Mebendazole	GSE5258	MCF7 Cell Line
MCF7 cells + resveratrol, 17.6uM _vs_ DMSO vehicle	3.52288	Chemical	resveratrol	GSE5258	MCF7 Cell Line
MCF7 cells + testosterone, 11.6uM _vs_ DMSO vehicle	3.52288	Chemical	Testosterone	GSE5258	MCF7 Cell Line
MCF7 cells + zuclopenthixol, 9.2uM _vs_ DMSO vehicle	3.52288	Chemical	zuclopenthixol	GSE5258	MCF7 Cell Line
MDA-MB-231 breast cancer cells with empty vector control + Dox _vs_ parental cells control	3.52288	Chemical	Doxycycline	GSE27842	MDA-MB-231 Cell Line
MDA-MB-231 cells expressing DNA binding domain mutant ER + 10nM estradiol at 24hr _vs_ untreated	3.52288	Chemical	Estradiol	GSE22593	MDA-MB-231 Cell Line
Melanoma A375 cells treated with 25uM A771726 for 72hr _vs_ 0hr	3.52288	Chemical	A 771726	GSE68039	A-375 Cell Line
Monocytes from lymphatic filariasis patients 8mo post albendazole treatment _vs_ healthy controls	3.52288	Chemical	Albendazole	GSE2135	Primary cells
Monocytes treated 6hr with M. tuberculosis derived TLR2 ligand _vs_ media	3.52288	chemical	M. tuberculosis derived TLR2 ligand	GSE8921	Primary cells - cultured
Normal lung WI-38 cell line exposed 24hr to 1uM BPDE _vs_ vehicle control	3.52288	Chemical	7,8-Dihydro-7,8-dihydroxybenzo(a)pyrene 9,10-oxide	GSE19510	WI 38 Cell Line
PC3 cells + diflorasone, 8uM _vs_ DMSO vehicle	3.52288	Chemical	diflorasone diacetate	GSE5258	PC-3 Cell Line [prostate cancer]
PC3 cells + hydrocortisone, 11uM _vs_ DMSO vehicle	3.52288	Chemical	Hydrocortisone	GSE5258	PC-3 Cell Line [prostate cancer]
PC3 cells + mebendazole, 13.6uM _vs_ DMSO vehicle	3.52288	Chemical	Mebendazole	GSE5258	PC-3 Cell Line [prostate cancer]
Peripheral nerve sheath tumor 90-8 cells 24hr with 100nM INK-128 and 2uM vorinostat _vs_ INK-128	3.52288	Chemical	vorinostat	GSE84205	Cell line
Propionic acidemia patient lymphoblastoid cell lines - 9mg/dL low glucose 24hr _vs_ normal	3.52288	Chemical	Glucose	GSE42816	Cell line
Prostate cancer cells ARCaP-E (epithelial) - 1uM vorinostat treated 48hr _ DMSO	3.52288	Chemical	vorinostat	GSE35242	Cell line
SAEC-hTERT treated 6mo - dispersed ultrafine carbon black _vs_ saline	3.52288	Chemical	Carbon Black	GSE41178	Primary cells
T cell Jurkat A3 cells treated 24hr with 10ug/mL 3-MPTMS ZnO particles _vs_ 24hr untreated	3.52288	Chemical	Zinc Oxide Nanoparticles	GSE39444	A3 Cell Line
THP-1 cell line Daboiatoxin treated _vs_ untreated	3.52288	Chemical	daboiatoxin	GSE7577	THP-1 Cell Line
TK6 spherocytic spleen cells 200uM formaldehyde treated 4hr _vs_ untreated	3.52288	Chemical	formalin	GSE41296	TK6 Cell Line
TK6 spherocytic spleen cells 80uM methyl methanesulfonate treated 4hr _vs_ untreated	3.52288	Chemical	Methyl Methanesulfonate	GSE41296	TK6 Cell Line
Tongue SCC-25 cells 1uM doxorubicin treated 48hr _vs_ untreated controls	3.52288	Chemical	Doxorubicin	GSE58074	SCC-25 Cell Line
Umbilical vein endothelial cells + 2hr with 500nM JQ1 then 1hr added 25ng/mL TNFA _vs_ 1hr TNFA	3.52288	Chemical	JQ1	GSE53999	Primary cells - cultured
Uveal melanoma Omm cells with GNAQ mutation + JQ1 for 24hr _vs_ untreated	3.52288	Chemical	JQ1	GSE66048	Cell line
36M2 ovarian serous carcinoma cell line 30hr after treatment with carboplatin _vs_ vehicle	3.39794	Chemical	Carboplatin	GSE13525	Cell line
Acute monocytic leukemia THP-1 cells treated 72hr with 100nM PMA _vs_ untreated controls	3.39794	Chemical	PMA	GSE96800	THP-1 Cell Line
Acute myeloid leukemia KG-1 cells + 4uM R406 for 24hr _vs_ vehicle (DMSO)	3.39794	Chemical	R 406 cpd	GSE46302	KG-1 Cell Line
B-cell lymphoma OCI-LY-19 cells treated 24hr with BRD4 inhibitor AZD5153 _vs_ DMSO control	3.39794	Chemical	AZD5153	GSE85840	OCI-LY-19 Cell Line
Bladder cancer MGH-U3 cells (FGFR3 Y375C) + PD 173074 _vs_ untreated controls	3.39794	Chemical	PD 173074	GSE52452	MGH-U3 Cell Line
Bone marrow cells cultured bortezomib-responsive myeloma - 2ug/ml bortezomib 6-8hr _vs_ PBS	3.39794	Chemical	bortezomib	GSE51940	Primary cells - cultured
Breast cancer MCF7 cell line treated with 10uM BMH-9 for 6hr _vs_ mock treated	3.39794	Chemical	BMH-9	GSE12666	MCF7 Cell Line
Breast cancer MCF7 cells after 24hr - treated with 1mg/mL CKI _vs_ untreated controls	3.39794	Chemical	kushen	GSE78512	MCF7 Cell Line
Breast cancer MCF7 cells after 48hr - treated with 10ug/mL fluorouracil _vs_ untreated controls	3.39794	Chemical	Fluorouracil	GSE78512	MCF7 Cell Line
Breast cancer-associated fibroblasts 1d after 24hr treatment with 0.65uM paclitaxel _vs_ untreated	3.39794	Chemical	Paclitaxel	GSE23399	Primary cells - cultured
Breast cancer-associated fibroblasts 3d after 24hr treatment with 0.65uM paclitaxel _vs_ untreated	3.39794	Chemical	Paclitaxel	GSE23399	Primary cells - cultured
Bronchial-tracheal epithelial cells + Cigarette10 smoke condensate 4ug/ml 18hr _vs_ control	3.39794	Chemical	cigarette smoke	GSE18235	Primary cells
Colorectal cancer HCT 116 cells mock transfected + 8hr 2.5uM vorinostat _vs_ 8hr DMSO	3.39794	Chemical	vorinostat	GSE57871	HCT 116 Cell Line
Colorectal cancer HCT116 cells treated 12hr with Nutlin-3 _vs_ DMSO vehicle	3.39794	Chemical	nutlin 3	GSE53965	HCT 116 Cell Line
Colorectal cancer LoVo cells + 200uM 5-fluorouracil for 24hr _vs_ untreated	3.39794	Chemical	5-Fluorouracil	GSE53617	LoVo Cell Line
Dendritic cells derived from immature monocytes - dexamethasone treated _vs_ untreated	3.39794	Chemical	Dexamethasone	GSE56017	Primary cells - cultured
Dendritic cells derived from monocytes with IL-4 + 6hr 60mg/mL Ixiaro _vs_ media_GPL10558	3.39794	Chemical	Ixiaro	GSE44722	Primary cells - cultured
Diffuse_large B cell lymphoma OCI-LY3 cells + 0.032uM geldanamycin for 12hr _vs_ untreated	3.39794	Chemical	geldanamycin	GSE51068	OCI-LY-3 Cell Line
Diffuse_large B cell lymphoma OCI-LY3 cells + 0.032uM geldanamycin for 6hr _vs_ untreated	3.39794	Chemical	geldanamycin	GSE51068	OCI-LY-3 Cell Line
Diffuse_large B cell lymphoma OCI-LY3 cells + 0.811uM etoposide for 6hr _vs_ untreated	3.39794	Chemical	etoposide	GSE51068	OCI-LY-3 Cell Line
Diffuse_large B cell lymphoma OCI-LY3 cells + 100uM monastrol for 6hr _vs_ untreated	3.39794	Chemical	monastrol	GSE51068	OCI-LY-3 Cell Line
Embryonal carcinoma NT2/D1 cell line - 0.5nM cisplatin treated 6hr then 24hr recovery _vs_ untreate	3.39794	Chemical	Cisplatin	GSE42645	Cell line
Embryonic kidney 293 cells with inducible RAF1-ER treated 4hr with 0.5uM 4OHT _vs_ BSA	3.39794	Chemical	hydroxytamoxifen	GSE97979	293 Cell Line
Farage DLBCL xenograft tumor from SCID mice + 75mg per kg PU-H71 after 6hr _vs_ untreated	3.39794	Chemical	PU-H71	GSE13401	Farage Cell Line
Fibroblast IMR90 cells TP53 shRNA 5d - 100nM etoposide 7d DNA damage induced senescence _vs_ growin	3.39794	Chemical	etoposide	GSE53379	IMR-90 Cell Line
HCT 116 cells treated with 100nM actinomycin D _vs_ untreated	3.39794	Chemical	Actinomycin D	GSE12459	HCT 116 Cell Line
HCT116 cell line treated with 5-FU 24hr _vs_ untreated	3.39794	Chemical	5-Fluorouracil	E-MEXP-390	HCT 116 Cell Line
Hela cells Menadione 24hr _vs_ Menadione 0hr	3.39794	Chemical	menadione	GSE4301	HeLa
Hepatocellular carcinoma cell line Hep3B 10uM 5-aza-dCyd treated for 5d _vs_ untreated	3.39794	Chemical	5-azacytidine	GSE35311	Hep 3B Cell Line
Hepatocytes of female donors treated 24hr with 10000uM theophylline _vs_ 0uM	3.39794	Chemical	Theophylline	TG-GATES	Primary cells - cultured
Hepatocytes of female donors treated 24hr with 100uM gemfibrozil _vs_ 0uM	3.39794	Chemical	Gemfibrozil	TG-GATES	Primary cells - cultured
Hepatocytes of female donors treated 24hr with 150uM diltiazem _vs_ 0uM	3.39794	Chemical	Diltiazem	TG-GATES	Primary cells - cultured
Hepatocytes of female donors treated 24hr with 3000uM sulindac _vs_ 0uM	3.39794	Chemical	Sulindac	TG-GATES	Primary cells - cultured
Hepatocytes of female donors treated 24hr with 5000uM acetaminophen _vs_ 0uM	3.39794	Chemical	Acetaminophen	TG-GATES	Primary cells - cultured
Hepatocytes of female donors treated 2hr with 125uM nitrofurantoin _vs_ 0uM	3.39794	Chemical	Nitrofurantoin	TG-GATES	Primary cells - cultured
Hepatocytes of female donors treated 8hr with 80uM tacrine _vs_ 0uM	3.39794	Chemical	Tacrine	TG-GATES	Primary cells - cultured
HL60 cells + diflorasone, 8uM _vs_ DMSO vehicle	3.39794	Chemical	diflorasone diacetate	GSE5258	HL-60 Cell Line
HL60 cells + digoxigenin, 10.2uM _vs_ DMSO vehicle	3.39794	Chemical	Digoxigenin	GSE5258	HL-60 Cell Line
HL60 cells + flumetasone, 9.8uM _vs_ DMSO vehicle	3.39794	Chemical	diflorasone diacetate	GSE5258	HL-60 Cell Line
K562 cells treated with PMA for 12hr _vs_ untreated	3.39794	Chemical	pma	GSE12736	K-562 Cell Line
Keratinocytes treated 24hr with 100uM hydrogen peroxide _vs_ untreated	3.39794	Chemical	Hydrogen peroxide	GSE58395	HaCaT Cell Line
Lung cancer PC-1 cells 72hr with 50uM carboplatin _vs_ DMSO	3.39794	Chemical	Carboplatin	GSE10075	PC-9 Cell Line
Lung cancer PC9 cell line with EGFR hypermorphic mutation - 2uM erlotinib treated 8d _vs_ DMSO	3.39794	Chemical	erlotinib	GSE67051	PC-9 Cell Line
Macrophages CD14+ 11d post isolation - 0.1uM rosiglitazone treated 24hr _vs_ DMSO	3.39794	Chemical	rosiglitazone	GSE35967	Primary cells - cultured
Mantle cell lymphoma REC1 cells (actived NOTCH1) 1uM MRK-003 72hr _vs_ untreated	3.39794	Chemical	MRK 003	GSE59810	REC-1 Cell Line
MCF7 breast cancer cells treated 8hr with 10mM menadione _vs_ untreated	3.39794	Chemical	menadione	GSE10061	MCF7 Cell Line
MCF7 cells + lynestrenol, 14uM _vs_ DMSO vehicle	3.39794	Chemical	Lynestrenol	GSE5258	MCF7 Cell Line
MCF7 cells + mepacrine, 7.8uM _vs_ DMSO vehicle	3.39794	Chemical	mepacrine	GSE5258	MCF7 Cell Line
MCF7 cells + methotrexate, 8.8uM _vs_ DMSO vehicle	3.39794	Chemical	Methotrexate	GSE5258	MCF7 Cell Line
MCF7 cells + rescinnamine, 6.4uM _vs_ DMSO vehicle	3.39794	Chemical	rescinnamine	GSE5258	MCF7 Cell Line
Monocytes CD14+CD16+ unstimulated 24hr - pretreated with 500nM EX00000246 30min _vs_ media only	3.39794	Chemical	EX00000246	GSE57494	Primary cells - cultured
Multiple myeloma LP-1 cells treated with 2.5uM SGC-CBP30 for 6hr _vs_ DMSO	3.39794	Chemical	SGC-CBP30	GSE64317	LP-1 Cell Line
Myelodysplastic syndrome MDS-L bone marrow cells + 7d 4nM decitabine _vs_ DMSO controls	3.39794	Chemical	5-azacytidine	GSE39628	Cell line
Neuroblastoma BE(2)-C cells treated 6hr - 125nM nanaomycin _vs_ vehicle controls	3.39794	Chemical	nanaomycin A	GSE76066	BE(2)-C Cell Line
Neuroblastoma cell line SH-SY5Y + atrazine _vs_ DMSO	3.39794	Chemical	Atrazine	GSE24500	SH-SY5Y Cell Line
Non-small cell lung cancer cell line A549 + 3uM azacitidine for 48hr _vs_ control	3.39794	Chemical	azacitidine	GSE29077	A549 Cell Line
NSCLC PC-9 cells 24hr with 0.5uM gefitinib _vs_ DMSO controls	3.39794	Chemical	gefitinib	GSE75309	PC-9 Cell Line
Osteosarcoma U-2 OS cells in non-released phase treated 8hr with 10uM nutlin _vs_ DMSO vehicle	3.39794	Chemical	nutlin-3A	GSE87668	U-2 OS Cell Line
Osteosarcoma U2OS cells overexpressing GR allele E773R + 100nM dexamethasone 2hr _vs_ 0hr ethanol	3.39794	Chemical	Dexamethasone	GSE45407	U-2 OS Cell Line
Ovarian cancer OV56 cells + 10X IC50 concentration of paclitaxel for 24hr _vs_ untreated	3.39794	Chemical	Paclitaxel	GSE50832	OV56 Cell Line
Ovarian cancer OVCAR-4 cells + 10X IC50 concentration of paclitaxel for 24hr _vs_ untreated	3.39794	Chemical	Paclitaxel	GSE50832	OVCAR-4 Cell Line
Ovarian cancer OVTOKO cells + 10X IC50 concentration of paclitaxel for 24hr _vs_ untreated	3.39794	Chemical	Paclitaxel	GSE50832	OVTOKO Cell Line
Pancreatic ductal adenocarcinoma AsPC-1 cells + 72hr PD 0332991 _vs_ untreated controls	3.39794	Chemical	PD 0332991	GSE39646	AsPC-1 Cell Line
Pancreatic stellate cell line PS1 on plastic 1uM all-trans retinoic acid treated 186hr _vs_ vehicle	3.39794	Chemical	Retinoic acid	GSE14427	Cell line
PBMC from ALL patients treated 24hr with glucocorticoid _vs_ untreated	3.39794	Chemical	glucocorticoid	GSE2677	Blood fraction
PC3 cells + dilazep, 6uM _vs_ DMSO vehicle	3.39794	Chemical	Dilazep	GSE5258	PC-3 Cell Line [prostate cancer]
PC3 cells + geldanamycin, 1uM _vs_ DMSO vehicle	3.39794	Chemical	geldanamycin	GSE5258	PC-3 Cell Line [prostate cancer]
PC3 cells + primaquine, 8.8uM _vs_ DMSO vehicle	3.39794	Chemical	Primaquine	GSE5258	PC-3 Cell Line [prostate cancer]
PC3 cells + tanespimycin, 1uM _vs_ DMSO vehicle	3.39794	Chemical	17-(allylamino)-17-demethoxygeldanamycin	GSE5258	PC-3 Cell Line [prostate cancer]
PC3 cells + trichostatin A, 0.1uM _vs_ DMSO vehicle	3.39794	Chemical	trichostatin A	GSE5258	PC-3 Cell Line [prostate cancer]
Peripheral blood mononuclear cells treated with 15uM 1-2-4-benzenetriol _vs_ untreated control	3.39794	Chemical	1-2-4-benzenetriol	GSE7664	Blood fraction
Plasma cell leukemia JJN-3 cells input RNA - treated with 25uM melphalan _vs_ untreated	3.39794	Chemical	Melphalan	GSE83662	JJN-3 Cell Line
Plasmacytoma NCI-H929 cells with ILF2 RNA IP - treated with 25uM melphalan _vs_ untreated	3.39794	Chemical	Melphalan	GSE83662	NCI-H929 Cell Line
Primary hepatocytes + 10uM Cyclosporin A for 48hr _vs_ DMSO	3.39794	Chemical	Cyclosporine	GSE55881	Primary cells - cultured
Prostate cancer LnCaP cells + 100nM troglitazone for 24hr _vs_ control	3.39794	Chemical	troglitazone	GSE60956	LNCaP Cell Line
Prostate cancer LnCaP cells overexpressing AR (T877A) - 10uM MDV3100 24hr _vs_ controls (DMSO)	3.39794	Chemical	MDV 3100	GSE44924	LNCaP Clone FGC Cell Line
Prostate carcinoma PC-3 cells treated 24hr with 10uM GSK525762A _vs_ DMSO vehicle	3.39794	Chemical	GSK525762A	GSE56352	PC-3 Cell Line [prostate cancer]
SH-SY5Y-A cells + 10 uM Retinoic acid 3d _vs_ 0hr	3.39794	Chemical	Retinoic acid	GSE9169	SH-SY5Y Cell Line
Skin malignant melanoma 501-MEL cells treated 12hr with 20mM salubrinal _vs_ DMSO controls	3.39794	Chemical	salubrinal	GSE86806	501 MEL Cell Line
SW620 colorectal cancer cells 4uM FAK inhibitor Y15 treated 24hr _vs_ untreated	3.39794	Chemical	1,2,4,5-benzenetetraamine tetrahydrochloride	GSE39168	SW 620 Cell Line
T-ALL cell lines compound E treated 12hr _vs_ DMSO	3.39794	Chemical	compound E (Friedheim)	GSE29959	Cell line
Whole blood endotoxin challenged then LR12 treated 8hr _vs_ 0hr	3.39794	Chemical	lissamine-rhodamine dodecanoic acid	GSE48311	Whole blood
ABL MV-4-11 cells ENL KO and overexpression - treated 96hr with 500nM EPZ-5676 _vs_ DMSO	3.30103	Chemical	Pinometostat	GSE82117	MV-4-11 Cell Line
Acute biphenotypic leukemia MV-4-11 cells treated 24hr with BRD4 inhibitor AZD5153 _vs_ DMSO control	3.30103	Chemical	AZD5153	GSE85840	MV-4-11 Cell Line
Breast adenocarcinoma MCF7 cells treated with 1uM AZD6244 then 4hr with EtOH _vs_ EtOH controls	3.30103	Chemical	AZD6244	GSE73663	MCF7 Cell Line
Breast cancer MCF7 cells + 12hr 1uM Ainsliadimer A _vs_ DMSO	3.30103	Chemical	ainsliadimer A	GSE85871	MCF7 Cell Line
Cervical cancer Hela-S3 cells 24hr treated with 35uM isoginkgetin _vs_ DMSO	3.30103	Chemical	isoginkgetin	GSE72055	HeLa S3 Cell Line
Colon cancer SW480 cells expressing NFIL3 - 3.3uM LY294002 treated 24hr _vs_ DMSO	3.30103	Chemical	LY 294002	GSE50841	SW 480 Cell Line
Cystic fibrosis bronchial epithelial cells expressing CFTR-dF508 - 24hr 10uM VRT-532 _vs_ DMSO	3.30103	Chemical	VRT 532	GSE67698	Cell line
Diffuse intrinsic pontine glioma SU-DIPG-IV cells treated for 12hr - 300nM JQ1 _vs_ DMSO controls	3.30103	Chemical	JQ1	GSE78801	Cell line
Embryonic kidney SCL60 cells (overexpressing GnRH-R) + 2hr 100nM triptorelin _vs_ untreated	3.30103	Chemical	Triptorelin Pamoate	GSE27467	293 Cell Line
Hep3B cells treated with deferoxamine 100uM 24hr _vs_ untreated 24hr	3.30103	Chemical	Deferoxamine mesylate	GSE1056	Hep 3B2.1-7 Cell Line
Hepatocellular carcinoma hepatocyte HepaRG cells + 6hr 100uM Genistein _vs_ DMSO	3.30103	Chemical	Genistein	GSE69851	HepaRG Cell Line
Hepatocytes of female donors treated 8hr with 2000uM theophylline _vs_ 0uM	3.30103	Chemical	Theophylline	TG-GATES	Primary cells - cultured
Hepatocytes of female donors treated 8hr with 250uM diazepam _vs_ 0uM	3.30103	Chemical	Diazepam	TG-GATES	Primary cells - cultured
Hepatocytes of female donors treated 8hr with 5000uM sulpiride _vs_ 0uM	3.30103	Chemical	Sulpiride	TG-GATES	Primary cells - cultured
HL60 cells + guanfacine, 14.2uM _vs_ DMSO vehicle	3.30103	Chemical	Guanfacine	GSE5258	HL-60 Cell Line
HL60 cells + naringenin, 14.6uM _vs_ DMSO vehicle	3.30103	Chemical	naringenin	GSE5258	HL-60 Cell Line
HL60 cells + nicardipine, 7.8uM _vs_ DMSO vehicle	3.30103	Chemical	Nicardipine	GSE5258	HL-60 Cell Line
HL60 cells + quinpirole, 15.6uM _vs_ DMSO vehicle	3.30103	Chemical	Quinpirole	GSE5258	HL-60 Cell Line
Hs294T melanoma cells serum starved 48hr + 50umol/l MMP inhibitor iIlomastat _vs_ untreated	3.30103	Chemical	ilomastat	GSE52246	Hs 294T Cell Line
Keratinocyte HaCaT cells overexpressing EGFR + EGF stimulated - 4hr U1026 _vs_ no U1026	3.30103	Chemical	U1026	GSE32975	HaCaT Cell Line
LNCaP androgen receptor positive prostate cancer cells 1nM R1881 treated 24hr _vs_ EtOH	3.30103	Chemical	R1881	GSE50936	LNCaP Cell Line
Lung A549 cells + 24hr PEGylated ormosil NP _vs_ 24hr culture controls	3.30103	Chemical	ormosil	GSE25991	A549 Cell Line
Lung fibroblasts pretreatment vehicle for 24hr - 10ug/cm2 CBNP for 48hr _vs_ vehicle	3.30103	Chemical	Carbon Black	GSE43515	Primary cells - cultured
MCF7 breast cancer cells hormone deplete 3d then 10uM doxorubicin treated 12hr _vs_ vehicle control	3.30103	Chemical	Doxorubicin	GSE39870	MCF7 Cell Line
MCF7 breast cancer cells treated 6hr traditional Chinese medicine Si-Wu-Tang 256 ug/mL _vs_ vehicle	3.30103	Chemical	si-wu-tang	GSE23610	MCF7 Cell Line
MCF7 cells + fenofibrate, 11uM _vs_ DMSO vehicle	3.30103	Chemical	Fenofibrate	GSE5258	MCF7 Cell Line
MCF7 cells + fulvestrant, 1uM _vs_ DMSO vehicle	3.30103	Chemical	fulvestrant	GSE5258	MCF7 Cell Line
MCF7 cells + proadifen, 10.2uM _vs_ DMSO vehicle	3.30103	Chemical	Proadifen	GSE5258	MCF7 Cell Line
Mesothelioma cell line MSTO-211H 760uM Piroxicam treated 8hr _vs_ untreated	3.30103	Chemical	Piroxicam	GSE22445	MSTO-211H Cell Line
Monocytic THP1 cells uninfected - 100nM 1,25-dihydroxyvitamin D for 24hr _vs_ untreated	3.30103	Chemical	Vitamin D	GSE52819	THP-1 Cell Line
MRC5 cells treated 48hr with 2ug per ml cyclosporine _vs_ untreated	3.30103	Chemical	Cyclosporine	GSE25200	MRC-5 Cell Line
NCI-H929 cell line + 5-aza-2-deoxycytidine 0.5uM _vs_ control	3.30103	Chemical	5-azacytidine	E-MEXP-1269	NCI-H929 Cell Line
Non-small cell lung cancer HCC2279 cells EGFR mutant + 1mM EGFR inhibitor erlotinib 24hr _vs_ DMSO	3.30103	Chemical	erlotinib	GSE57156	HCC2279 Cell Line
Osteoblasts of healthy donors + serum starvation then 2hr of 1uM PGE2 _vs_ vehicle	3.30103	Chemical	PGE2	GSE21728	Primary cells - cultured
Ovarian cancer A2008 cells + GI50 concentration of cisplatin for 48hr _vs_ untreated	3.30103	Chemical	Cisplatin	GSE47856	Cell line
PC3 cells + trichostatin A, 1uM _vs_ DMSO vehicle	3.30103	Chemical	trichostatin A	GSE5258	PC-3 Cell Line [prostate cancer]
Plasma cell leukemia JJN-3 cells with ILF2 shRNA - 10hr with 25uM melphalan _vs_ untreated	3.30103	Chemical	Melphalan	GSE83712	JJN-3 Cell Line
Prostate cancer LnCaP cells empty vector - 10uM MDV3100 24hr _vs_ controls (DMSO)	3.30103	Chemical	MDV 3100	GSE44924	LNCaP Clone FGC Cell Line
Prostate cancer PC3 cells overexpressing ERG - 500nM I-BET762 24hr _vs_ untreated	3.30103	Chemical	I-BET762	GSE55063	PC-3 Cell Line [prostate cancer]
Secondary AML SET2 cells treated 4hr with 1uM OXT015 (BET inhibitor) _vs_ untreated controls	3.30103	Chemical	OXT015	GSE93578	SET-2 Cell Line
TK6 spherocytic spleen cells 100uM formaldehyde treated 24hr _vs_ untreated	3.30103	Chemical	formalin	GSE41296	TK6 Cell Line
36M2 ovarian serous carcinoma cell line 24hr after treatment with carboplatin _vs_ vehicle	3.22185	Chemical	Carboplatin	GSE13525	Cell line
Acute promyelocytic leukemia HL-60 cells overexpressing EVI1 treated 24hr with 1uM ATRA _vs_ DMSO	3.22185	Chemical	Retinoic acid	GSE66837	HL-60 Cell Line
Anaplastic Large Cell Lymphoma TS cell line - ALK inhibitor CEP-14083 treated 6hr _vs_ untreated	3.22185	Chemical	CEP 14083	GSE6184	Cell line
Breast adenocarcinoma MCF7 cells 1uM Alpelisib treated 12hr _vs_ untreated	3.22185	Chemical	Alpelisib	GSE64033	MCF7 Cell Line
Breast cancer MCF7 cells + 12hr 10uM Honokiol _vs_ DMSO	3.22185	Chemical	honokiol	GSE85871	MCF7 Cell Line
Cytokine-induced glioblastoma cells + erstressin for 6.5h _vs_ vehicle	3.22185	Chemical	erstressin	GSE7806	A172 Cell Line
Diffuse large B-cell lymphoma OCI-Ly4 cells + 500nM JQ1 for 24hr _vs_ vehicle (DMSO)	3.22185	Chemical	JQ1	GSE45630	Cell line
Diffuse_large B cell lymphoma OCI-LY3 cells + 0.03uM doxorubicin for 12hr _vs_ untreated	3.22185	Chemical	doxorubicin	GSE51068	OCI-LY-3 Cell Line
Diffuse_large B cell lymphoma OCI-LY3 cells + 20.2uM H-7 dichloride for 6hr _vs_ untreated	3.22185	Chemical	H-7dichloride	GSE51068	OCI-LY-3 Cell Line
Gastric adenocarcinoma AGS cells - mycophenolic acid treated 72hr _vs_ untreated	3.22185	Chemical	Mycophenolic Acid	GSE46671	AGS Cell Line
HCT116 colorectal cancer cells - Decitabine (5uM) treated 72hr _vs_ DMSO control	3.22185	Chemical	5-azacytidine	GSE30985	HCT 116 Cell Line
Hepatocellular carcinoma hepatocyte HepG2 cells + 6hr 100uM bisphenol A _vs_ DMSO	3.22185	Chemical	bisphenol A	GSE69851	Hep G2 Cell Line
Hepatocytes of female donors treated 24hr with 10000uM ethionine _vs_ 0uM	3.22185	Chemical	Ethionine	TG-GATES	Primary cells - cultured
HL60 cells + betamethasone, 10.2uM _vs_ DMSO vehicle	3.22185	Chemical	Dexamethasone	GSE5258	HL-60 Cell Line
HL60 cells + phenazopyridine, 16uM _vs_ DMSO vehicle	3.22185	Chemical	Phenazopyridine	GSE5258	HL-60 Cell Line
HL60 cells + tribenoside, 8.4uM _vs_ DMSO vehicle	3.22185	Chemical	tribenoside	GSE5258	HL-60 Cell Line
Lung epithelium A549 cells 200ug/ml silica treated from 6hr _vs_ untreated	3.22185	Chemical	Silicon Dioxide	GSE30200	A549 Cell Line
Lung tissue from asthmatic patients 1wk post flovent treatment _vs_ pre-treatment	3.22185	Chemical	Flovent	GSE23611	Primary tissue - fresh or fresh frozen
Lymphoblastoid TK6 cells 10Jm2 UVC-irradiated - 4hr 1nM TPA-treated _vs_ 4hr DMSO	3.22185	Chemical	phorbolol myristate acetate	GSE71521	TK6 Cell Line
Melanoma metastatic tumor Sk-mel-28 cell line - 6hr post 10ug/ml cisplatin treated _vs_ untreated	3.22185	Chemical	Cisplatin	GSE47980	SK-MEL-28 Cell Line
MM1S myeloma cells sensitive to 8-amino-adenosine -treated 17hr _vs_ 0hr	3.22185	Chemical	8-amino-2'-deoxyadenosine	GSE38145	MM.1S Cell Line
NSCLC HCC827 erlotinib-resistant subline T15-2 - 1uM erlotinib treated for 12hr _vs_ DMSO control	3.22185	Chemical	erlotinib	GSE38310	HCC827 Cell Line
Ovarian cancer TOV-21G cells + 10X IC50 concentration of paclitaxel for 24hr _vs_ untreated	3.22185	Chemical	Paclitaxel	GSE50832	TOV-21G Cell Line
PC3 cells + quinisocaine, 13uM _vs_ DMSO vehicle	3.22185	Chemical	quinisocaine	GSE5258	PC-3 Cell Line [prostate cancer]
Primary aortic endothelial cells + 500nM trichostatin A (TSA) for 12hr _vs_ untreated	3.22185	Chemical	trichostatin A	GSE37376	Primary cells - cultured
Prostate cancer PC3 cells polyA RNA - 2.5uM PP242 3hr _vs_ vehicle control	3.22185	Chemical	PP242	GSE35469	PC-3 Cell Line [prostate cancer]
Renal cell carcinoma A-498 cell xenografts from mice - 80mg/kg sorafenib treated _vs_ untreated	3.22185	Chemical	sorafenib	GSE64052	786-O Cell Line
SU-DHL-4 B-cell lymphoma cells 4hr post 10ug-ml Rituximab treatment _vs_ control	3.22185	Chemical	rituximab	GSE23394	SU-DHL-4 Cell Line
Tumorigenic foreskin fibroblast BJ LTSTERas cells + 4hr 25uM vorinostat _vs_ control (DMSO)	3.22185	Chemical	vorinostat	GSE43010	BJ Cell Line [foreskin]
Uveal melanoma Mel202 cells with GNAQ mutation + JQ1 for 24hr _vs_ untreated	3.22185	Chemical	JQ1	GSE66048	Cell line
A549 lung cancer cells + resveratrol _vs_ vehicle	3.1549	Chemical	resveratrol	GSE9008	A549 Cell Line
Acute myeloid leukemia Kasumi-1 cells 10uM Iressa-treated 24hr _vs_ 24hr DMSO_GPL96	3.1549	Chemical	Iressa	GSE68954	Kasumi-1 Cell Line
Breast adenocarcinoma MCF7 cells + 6hr 100uM Vorinostat _vs_ DMSO	3.1549	Chemical	Vorinostat	GSE69851	MCF7 Cell Line
Breast adenocarcinoma MCF7 cells + 6hr 1uM 1-napthylisothiocyanate _vs_ DMSO	3.1549	Chemical	1-napthylisothiocyanate	GSE69851	MCF7 Cell Line
Breast cancer MCF7 cell line treated with 5uM BMH-23 for 6hr _vs_ mock treated	3.1549	Chemical	BMH-23	GSE12666	MCF7 Cell Line
Breast cancer MDA-MB-468 cells + 10X IC50 concentration of paclitaxel for 24hr _vs_ untreated	3.1549	Chemical	Paclitaxel	GSE50832	MDA-MB-468 Cell Line
Bronchus epithelial BEAS-2B cells treated 6hr - 10nM GS-5759 _vs_ vehicle	3.1549	Chemical	GS-5759	GSE84880	BEAS-2B Cell Line
CaSki cells + DAC + trichostatin A _vs_ untreated	3.1549	Chemical	Trichostatin A	GSE2097	Ca Ski Cell Line
Colon cancer HCT116 cells + 350uM 5-fluorouracil (DNA damage inducer) for 12hr _vs_ untreated	3.1549	Chemical	5-fluorouracil	GSE58507	HCT 116 Cell Line
Diffuse large B-cell lymphoma DHL6 cells + 500nM JQ1 for 48hr _vs_ vehicle (DMSO)	3.1549	Chemical	JQ1	GSE45630	SU-DHL-6 Cell Line
Diffuse large B-cell lymphoma Karpas-422 cells treated 72hr with 5uM EED-226 _vs_ DMSO	3.1549	Chemical	EED-226	GSE81267	KARPAS-422 Cell Line
Diffuse_large B cell lymphoma OCI-LY3 cells + 0.01uM camptothecin for 6hr _vs_ untreated	3.1549	Chemical	camptothecin	GSE51068	OCI-LY-3 Cell Line
Diffuse_large B cell lymphoma OCI-LY3 cells + 0.101uM doxorubicin for 12hr _vs_ untreated	3.1549	Chemical	doxorubicin	GSE51068	OCI-LY-3 Cell Line
Diffuse_large B cell lymphoma OCI-LY3 cells + 0.812uM etoposide for 12hr _vs_ untreated	3.1549	Chemical	etoposide	GSE51068	OCI-LY-3 Cell Line
HCC Hep G2 cells treated for 24hr - 12.5uM nefazodone _vs_ DMSO controls	3.1549	Chemical	nefazodone	GSE10200	Hep G2 Cell Line
HCT116 colorectal cancer cells - Decitabine prodrug-G669071 (120nM) treated 72hr _vs_ DMSO control	3.1549	Chemical	Decitabine prodrug-G669071	GSE30985	HCT 116 Cell Line
Hepatocellular carcinoma hepatocyte HepaRG cells + 6hr 100nM retinoic acid _vs_ DMSO	3.1549	Chemical	retinoic acid	GSE69851	HepaRG Cell Line
Hepatocytes of female donors treated 24hr with 7500uM caffeine _vs_ 0uM	3.1549	Chemical	Caffeine	TG-GATES	Primary cells - cultured
HepG2 hepatocellular carcinoma cell line 60uM Anis treated for 48hr _vs_ DMSO control	3.1549	Chemical	4-anisidine	GSE28878	Hep G2 Cell Line
HL60 cells + cefoperazone, 5.8uM _vs_ DMSO vehicle	3.1549	Chemical	Cefoperazone	GSE5258	HL-60 Cell Line
HL60 cells + digoxin, 5.2uM _vs_ DMSO vehicle	3.1549	Chemical	Digoxin	GSE5258	HL-60 Cell Line
HL60 cells + glafenine, 9.8uM _vs_ DMSO vehicle	3.1549	Chemical	Glafenine	GSE5258	HL-60 Cell Line
HL60 cells + hydroquinine, 9.4uM _vs_ DMSO vehicle	3.1549	Chemical	hydroquinine	GSE5258	HL-60 Cell Line
HL60 cells + strophanthidin, 9.8uM _vs_ DMSO vehicle	3.1549	Chemical	Strophanthidin	GSE5258	HL-60 Cell Line
Human CD4+ T cells + HDAC inhibitor treatment 2hr _vs_ untreated_GPL270	3.1549	Chemical	trichostatin A	GSE15735	Primary cells
Macrophages treated 6hr with 10ug curdlan _vs_ untreated controls	3.1549	Chemical	curdlan	GSE32282	Primary cells - cultured
MCF7 cells + famprofazone, 10.6uM _vs_ DMSO vehicle	3.1549	Chemical	famprofazone	GSE5258	MCF7 Cell Line
MCF7 cells + N-acetyl-L-leucine, 23uM _vs_ DMSO vehicle	3.1549	Chemical	acetylleucine	GSE5258	MCF7 Cell Line
MCF7 cells + noretynodrel, 13.4uM _vs_ DMSO vehicle	3.1549	Chemical	Norethynodrel	GSE5258	MCF7 Cell Line
MCF7 cells + oxaprozin, 300uM _vs_ DMSO vehicle	3.1549	Chemical	oxaprozin	GSE5258	MCF7 Cell Line
Pancreatic ductal adenocarcinoma CFPAC-1 cells 5hr with 1.6uM CPI203 _vs_ untreated controls	3.1549	Chemical	CPI203	GSE55209	CFPAC-1 Cell Line
Primary tracheal basal cell line - SOX2 expression + 2.5uM BMK120 for 36hr_vs_ SOX2 expression only	3.1549	Chemical	BMK120	GSE59866	Cell line
Whole blood of normal donors + 2hr 3ug/mL R848 _vs_ untreated	3.1549	Chemical	R848	GSE25742	Whole blood
Breast adenocarcinoma MCF7 cells (RNA-seq) for 5hr - 6uM camptothecin treated _vs_ DMSO controls	3.09691	Chemical	Camptothecin	GSE96643	MCF7 Cell Line
Breast cancer HCC-1419 cells + 10X IC50 concentration of eribulin for 24hr _vs_ untreated	3.09691	Chemical	eribulin	GSE50832	HCC1419 Cell Line
Breast carcinoma SUM cells + 24hr 500nM JQ1 _vs_ DMSO_GPL11154	3.09691	Chemical	JQ1	GSE63582	SUM159PT Cell Line
Breast MCF7 cells with 10uM S2101 for 96hr _vs_ untreated	3.09691	Chemical	S2101	GSE74036	MCF7 Cell Line
Colorectal cancer HT29 cells treated with 5uM 5-aza-CdR for 5d _vs_ vehicle (DMSO)	3.09691	Chemical	5-azacytidine	GSE41364	HT 29 Cell Line
CRC YB5 cells with 1uM UNC0638 for 96hr _vs_ untreated controls	3.09691	Chemical	UNC0638	GSE73966	Cell line
Cystic fibrosis bronchial epithelial cells expressing CFTR-dF508 - 24hr 10uM RDR3 _vs_ DMSO	3.09691	Chemical	5-(2-((5-(2-bromo-4-nitrophenyl)-2-furyl) methylene) hydrazino)-2-chlorobenzoic acid	GSE67698	Cell line
Dermal fibroblasts in quiescence - DNP and 2DG treated 24hr _vs_ untreated	3.09691	Chemical	2,4-Dinitrophenol	GSE67981	Primary cells - cultured
Diffuse large B-cell lymphoma HBL1 cells + 500nM JQ1 for 24hr _vs_ vehicle (DMSO)	3.09691	Chemical	JQ1	GSE45630	HBL-1 Cell Line
Diffuse_large B cell lymphoma OCI-LY3 cells + 20.2uM H-7 dichloride for 12hr _vs_ untreated	3.09691	Chemical	H-7dichloride	GSE51068	OCI-LY-3 Cell Line
Glioblastoma T98G cells overexpressing MIR155 - 72hr with 300uM temozolomide _vs_ DMSO	3.09691	Chemical	temozolomide	GSE79081	T98G Cell Line
HCT 116 cells treated with 1nM actinomycin D _vs_ untreated	3.09691	Chemical	Actinomycin D	GSE12459	HCT 116 Cell Line
Hep3B cells treated with cobalt chloride 100uM 24hr _vs_ untreated 24hr	3.09691	Chemical	cobaltous chloride	GSE1056	Hep 3B2.1-7 Cell Line
Hepatoma cell line Huh7 non-side population 100uM Zebularine 72hr treated _vs_ untreated	3.09691	Chemical	pyrimidin-2-one beta-ribofuranoside	GSE24520	HuH-7 Cell Line
HHUA endometrial cancer cells scytonemin treated 48hr _vs_ untreated	3.09691	Chemical	scytonemin	GSE37170	HHUA Cell Line
HL60 cells + riluzole, 14.8uM _vs_ DMSO vehicle	3.09691	Chemical	Riluzole	GSE5258	HL-60 Cell Line
Huh7 cells + 5uM cyclosporin A cultured for 24hr _vs_ untreated	3.09691	Chemical	Cyclosporine	GSE15935	HuH-7 Cell Line
Ishikawa cell line (ERÎ±, ERÎ² and PGR positive) 10nM BPA treated for 48hr _vs_ control 48hr	3.09691	Chemical	bisphenol A	GSE17624	Ishikawa Cell Line
Ishikawa cells + 100pM 17-alpha-estradiol 48hr _vs_ vehicle control	3.09691	Chemical	17a-estradiol	GSE11869	Ishikawa Cell Line
Lymphoblastoid cell lines from non-alcoholic subjects 75mM ethanol treated 24hr _vs_ untreated	3.09691	Chemical	Ethanol	GSE52553	Cell line
MCF7 cells + BW-B70C, 31.6uM _vs_ DMSO vehicle	3.09691	Chemical	BW B70C	GSE5258	MCF7 Cell Line
NHBE cells 4hr post-exposure to 15min of reference cigarette smoke _vs_ light cigarette smoke	3.09691	Chemical	Tobacco smoke	GSE10700	Primary cells
PBMCs from hepatitis C patients + peg-interferon alfa 2b + ribavirin at day 10 of therapy _vs_ day 0	3.09691	Chemical	Ribavirin	GSE11342	Blood fraction
PBMCs of old adults (â‰¥65yr) - 0.5ug/mL CL097 (TLR7-8 agonist) treated 6hr _vs_ untreated	3.09691	Chemical	CL097	GSE62627	Primary cells - cultured
PBMCs treated with R547 at IC90 for 24hr _vs_vehicle 24hr	3.09691	Chemical	R547	GSE15396	Blood fraction
PC3 cells + eticlopride, 10.6uM _vs_ DMSO vehicle	3.09691	Chemical	eticlopride	GSE5258	PC-3 Cell Line [prostate cancer]
PC3 cells + flumetasone, 9.8uM _vs_ DMSO vehicle	3.09691	Chemical	flumetasone	GSE5258	PC-3 Cell Line [prostate cancer]
PC3 cells + mianserin, 13.2uM _vs_ DMSO vehicle	3.09691	Chemical	Mianserin	GSE5258	PC-3 Cell Line [prostate cancer]
PC3 cells + repaglinide, 8.8uM _vs_ DMSO vehicle	3.09691	Chemical	repaglinide	GSE5258	PC-3 Cell Line [prostate cancer]
Propionic acidemia male patient lymphoblastoid cell lines - 9mg/dL low glucose 24hr _vs_ normal	3.09691	Chemical	Glucose	GSE42816	Cell line
Prostate cancer cells ARCaP-M (mesenchymal) - 20uM genistein treated 6d _vs_ DMSO	3.09691	Chemical	Genistein	GSE35242	Cell line
A2780 ovarian cancer cells + oxaliplatin IC50 2hr then cultured drug-free 16hr _vs_ untreated 16hr	3.04576	Chemical	oxaliplatin	GSE8057	A2780 Cell Line
A673 EWS-FLI translocated Ewing sarcoma cell line + 0.34uM (2xEC50) cytarabine 5d _vs_ DMSO	3.04576	Chemical	Cytarabine	GSE6930	A-673 Cell Line
B-cell lymphoma cell line - indomethacin treated for 24hr _vs_ DMSO control	3.04576	Chemical	indomethacin	GSE60408	B-cell lymphoma
Breast cancer MCF7 cells treated with 1nM 17beta-estradiol for 48hr _vs_ controls	3.04576	Chemical	Estradiol	GSE50705	MCF7 Cell Line
Diffuse_large B cell lymphoma OCI-LY3 cells + 0.01uM vincristine for 24hr _vs_ untreated	3.04576	Chemical	vincristine	GSE51068	OCI-LY-3 Cell Line
Embryonic kidney SCL60 cells (overexpressing GnRH-R) + 1hr 100nM triptorelin _vs_ vehicle	3.04576	Chemical	Triptorelin Pamoate	GSE27467	293 Cell Line
ESCs OSCAR activated STAT3-ERT2 and LIF treated - Chir99021 PD0325901 treated _vs_ untreated	3.04576	Chemical	PD0325901	GSE55708	OSCAR Stem Cell Line
HCT 116 p53 KO cells treated with 1nM actinomycin D _vs_ untreated	3.04576	Chemical	Actinomycin D	GSE12459	HCT 116 Cell Line
HCT116 TP53 KO colon cancer cells + NO 1hr _vs_ untreated KO	3.04576	Chemical	Nitric Oxide	GSE3176	HCT 116 Cell Line
Hepatocellular carcinoma cell line HepG2 - 7uM cisplatin treated 24hr _vs_ PBS control	3.04576	Chemical	Cisplatin	GSE38122	Hep G2 Cell Line
Hepatocellular carcinoma hepatocyte HepaRG cells + 6hr 100uM progesterone _vs_ DMSO	3.04576	Chemical	progesterone	GSE69851	HepaRG Cell Line
Hepatocellular carcinoma hepatocyte HepaRG cells + 6hr 1mM 6-aminonicotinamide _vs_ DMSO	3.04576	Chemical	6-aminonicotinamide	GSE69851	HepaRG Cell Line
Hepatocellular carcinoma HepG2 cells + 72hr 5.9mM IC10 cyclophosphamide _vs_ 0.5% DMSO	3.04576	Chemical	Cyclophosphamide monohydrate	GSE40117	Hep G2 Cell Line
Hepatocytes of female donors treated 8hr with 300uM carbamazepine _vs_ 0uM	3.04576	Chemical	Carbamazepine	TG-GATES	Primary cells - cultured
HL60 cells + isoconazole, 9.6uM _vs_ DMSO vehicle	3.04576	Chemical	isoconazole	GSE5258	HL-60 Cell Line
HL60 cells + simvastatin, 9.6uM _vs_ DMSO vehicle	3.04576	Chemical	Simvastatin	GSE5258	HL-60 Cell Line
Hodgkin's lymphoma L-1236 cells 24hr with 1uM decitabine then incubated 72hr _vs_ untreated	3.04576	Chemical	decitabine	GSE86068	L-1236 Cell Line
MCF7 cells + monensin, 5.8uM _vs_ DMSO vehicle	3.04576	Chemical	Monensin	GSE5258	MCF7 Cell Line
MCF7 cells + norcyclobenzaprine, 15.4uM _vs_ DMSO vehicle	3.04576	Chemical	norcyclobenzaprine	GSE5258	MCF7 Cell Line
MCF7 cells + pimethixene, 9.8uM _vs_ DMSO vehicle	3.04576	Chemical	pimethixene	GSE5258	MCF7 Cell Line
MCF7 cells + prochlorperazine, 6.6uM _vs_ DMSO vehicle	3.04576	Chemical	Prochlorperazine	GSE5258	MCF7 Cell Line
MCF7 cells + rifabutin, 4.8uM _vs_ DMSO vehicle	3.04576	Chemical	Rifabutin	GSE5258	MCF7 Cell Line
MCF7 cells + tracazolate, 11.8uM _vs_ DMSO vehicle	3.04576	Chemical	tracazolate	GSE5258	MCF7 Cell Line
Monocytes from healthy donors - 1mM TLR8 agonist treated overnight _vs_ vehicle control	3.04576	Chemical	TLR8 agonist	GSE64480	Primary cells
Pediatric glioma UW479 cells treated 48hr with IGC-001 _vs_ DMSO	3.04576	Chemical	ICG 001	GSE83266	Cell line
Plasma cell leukemia JJN-3 cells with YB1 RNA IP - treated with 25uM melphalan _vs_ untreated	3.04576	Chemical	Melphalan	GSE83664	JJN-3 Cell Line
Prostate cancer LNCaP cells - 10uM MDV3100 treated for 48hr _vs_ DMSO control	3.04576	Chemical	MDV 3100	GSE78201	LNCaP Cell Line
SH-SY5Y-A cells + 10 uM Retinoic acid 2d _vs_ 0hr	3.04576	Chemical	Retinoic acid	GSE9169	SH-SY5Y Cell Line
Breast adenocarcinoma MCF7 cells + 6hr 100uM farnesol _vs_ DMSO	3	Chemical	farnesol	GSE69851	MCF7 Cell Line
Breast adenocarcinoma MCF7 cells + 6hr 10uM Vorinostat _vs_ DMSO	3	Chemical	Vorinostat	GSE69851	MCF7 Cell Line
Bronchial airway epithelial cells treated with 50mM ethanol _vs_untreated	3	Chemical	Ethanol	GSE12253	Primary cells - cultured
CML K562 cells with SPI1 shRNA-2 treated 72hr with 1uM SAHA _vs_ DMSO	3	Chemical	SAHA	GSE74999	K-562 Cell Line
Glioblastoma multiforme neurosphere cultures - 10mM DDC 1hr _vs_ 1hr 5mM DPI	3	Chemical	diphenyleneiodonium	GSE32335	Primary cells - cultured
HA1ER cells glucose-starved - treated 3hr with 2-deoxyglucose _vs_ untreated	3	Chemical	Deoxyglucose	GSE11242	Cell line
Hepatocytes of female donors treated 2hr with 75uM adapin _vs_ 0uM	3	Chemical	adapin	TG-GATES	Primary cells - cultured
[truncated: 9,726 more rows]

## Sheet: Predictive accuracy biosets
Bioset name	Biomarker -Log(p-value)	pos/neg	chemical
Colorectal cancer Caco-2 cells 6hr treated with 110nM AgNPs _vs_ untreated controls	25.2924	true positive	Silver Nanoparticles
Colorectal cancer Caco-2 cells 24hr treated with 20nM AgNPs _vs_ untreated controls	22.7696	true positive	Silver Nanoparticles
Colorectal cancer Caco-2 cells 24hr treated with 60nM AgNPs _vs_ untreated controls	21.8539	true positive	Silver Nanoparticles
Multiple myeloma cell lines treated with arsenic trioxide 6hr _vs_ control	21.585	true positive	arsenic trioxide
Colorectal cancer Caco-2 cells 24hr treated with 30nM AgNPs _vs_ untreated controls	21.3468	true positive	Silver Nanoparticles
Colorectal cancer Caco-2 cells 24hr treated with 110nM AgNPs _vs_ untreated controls	20.1192	true positive	Silver Nanoparticles
Breast adenocarcinoma MCF-7 cells 6hr treated with 20nM AgNPs _vs_ untreated controls	19.6383	true positive	Silver Nanoparticles
Colorectal cancer Caco-2 cells 6hr treated with 20nM AgNPs _vs_ untreated controls	19.1079	true positive	Silver Nanoparticles
Multiple myeloma cell lines treated with arsenic trioxide 48hr _vs_ control	17.9586	true positive	arsenic trioxide
Colorectal cancer Caco-2 cells 6hr treated with 1.5ug/ml AgNO3 _vs_ untreated controls	17.585	true positive	Silver Nitrate
Multiple myeloma cell lines treated with arsenic trioxide 24hr _vs_ control	16.5528	true positive	arsenic trioxide
Skin BJ fibroblasts without actinomycin D - 1uM sodium arsenite 24hr pre-treated _vs_ water	16.3872	true positive	sodium arsenite
T cell Jurkat A3 cells treated 6hr with 10ug/mL ZnO particles _vs_ 6hr untreated	16.0757	true positive	Zinc Oxide Nanoparticles
Colorectal cancer Caco-2 cells 6hr treated with 30nM AgNPs _vs_ untreated controls	15.0706	true positive	Silver Nanoparticles
Olfactory neurosphere cells - 25ug/ml coated MAX ZnO nanoparticle treated 6hr _vs_ untreated	15.0362	true positive	Zinc Oxide Nanoparticles
Skin BJ fibroblasts with 5ug/mL actinomycin D 1hr - 1uM sodium arsenite 24hr pre-treated _vs_ water	14.9208	true positive	sodium arsenite
Breast adenocarcinoma MCF-7 cells 6hr treated with 30nM AgNPs _vs_ untreated controls	14.3188	true positive	Silver Nanoparticles
Breast adenocarcinoma MCF-7 cells 6hr treated with 1.5ug/ml AgNO3 _vs_ untreated controls	14.1871	true positive	Silver Nitrate
T cell Jurkat A3 cells treated 24hr with 100ug/mL methoxyl ZnO particles _vs_ 24hr untreated	14.0809	true positive	Zinc Oxide Nanoparticles
Breast adenocarcinoma MCF-7 cells 24hr treated with 20nM AgNPs _vs_ untreated controls	14.041	true positive	Silver Nanoparticles
Macrophages derived from monocytes treated 24hr with 10ug/mL ZnO particles _vs_ 24hr untreated	13.1024	true positive	Zinc Oxide Nanoparticles
Hepatic stellate cells 30ug/ml HP1 ZnO nanoparticle treated 24hr _vs_ untreated	12.8239	true positive	Zinc Oxide Nanoparticles
Lymphoblastoid B cells treated 2hr with 5uM sodium arsenite _vs_ untreated controls	12.0269	true positive	sodium arsenite
Olfactory neurosphere cells - 25ug/ml coated HP1 ZnO nanoparticle treated 2hr _vs_ untreated	11.8861	true positive	Zinc Oxide Nanoparticles
Olfactory neurosphere cells - 25ug/ml coated HP1 ZnO nanoparticle treated 6hr _vs_ untreated	11.8239	true positive	Zinc Oxide Nanoparticles
T cell Jurkat A3 cells treated 24hr with 10ug/mL diethylene glycol ZnO particles _vs_ 24hr untreated	11.7696	true positive	Zinc Oxide Nanoparticles
Olfactory neurosphere cells - 25ug/ml uncoated Z-COTE ZnO nanoparticle treated 2hr _vs_ untreated	11.7447	true positive	Zinc Oxide Nanoparticles
Olfactory neurosphere cells - 25ug/ml uncoated Nanosun ZnO nanoparticle treated 2hr _vs_ untreated	11.3979	true positive	Zinc Oxide Nanoparticles
Hepatic stellate cells 30ug/ml MAX ZnO nanoparticle treated 24hr _vs_ untreated	11.2518	true positive	Zinc Oxide Nanoparticles
Breast adenocarcinoma MCF-7 cells 24hr treated with 30nM AgNPs _vs_ untreated controls	10.9208	true positive	Silver Nanoparticles
Olfactory neurosphere cells - 25ug/ml uncoated Z-COTE ZnO nanoparticle treated 6hr _vs_ untreated	10.8861	true positive	Zinc Oxide Nanoparticles
Breast adenocarcinoma MCF-7 cells 24hr treated with 60nM AgNPs _vs_ untreated controls	10.5229	true positive	Silver Nanoparticles
Olfactory neurosphere cells - 25ug/ml uncoated Nanosun ZnO nanoparticle treated 6hr _vs_ untreated	10.4949	true positive	Zinc Oxide Nanoparticles
T cell Jurkat A3 cells treated 24hr with 10ug/mL ZnO particles _vs_ 24hr untreated	9.55284	true positive	Zinc Oxide Nanoparticles
Olfactory neurosphere cells - 25ug/ml coated MAX ZnO nanoparticle treated 2hr _vs_ untreated	9.42022	true positive	Zinc Oxide Nanoparticles
Breast adenocarcinoma MCF-7 cells 6hr treated with 110nM AgNPs _vs_ untreated controls	9.08619	true positive	Silver Nanoparticles
Hepatic stellate cells 30ug/ml Z-COTE ZnO nanoparticle treated 24hr _vs_ untreated	8.88606	true positive	Zinc Oxide Nanoparticles
Breast adenocarcinoma MCF-7 cells 24hr treated with 110nM AgNPs _vs_ untreated controls	8.65758	true positive	Silver Nanoparticles
Colorectal cancer Caco-2 cells 24hr treated with 1.5ug/ml AgNO3 _vs_ untreated controls	8.21467	true positive	Silver Nitrate
Dendritic cells derived from monocytes treated 24hr with 10ug/mL ZnO particles _vs_ 24hr untreated	8.03621	true positive	Zinc Oxide Nanoparticles
Bronchial epithelial BEAS-2B cells treated 3wk - 0.5uM HgCl2 _vs_ acetone controls	7.69897	true positive	Mercuric Chloride
T cell Jurkat A3 cells treated 24hr with 50ug/mL methoxyl ZnO particles _vs_ 24hr untreated	7.3279	true positive	Zinc Oxide Nanoparticles
Bronchial epithelial BEAS-2B cells treated 3wk - 0.5uM HgCl2 and 2nM TCDD _vs_ acetone controls	7.30103	true positive	Mercuric Chloride
T cell Jurkat A3 cells treated 24hr with 10ug/mL folic acid ZnO particles _vs_ 24hr untreated	7.284	true positive	Zinc Oxide Nanoparticles
T cell Jurkat A3 cells treated 24hr with 10ug/mL methoxyl ZnO particles _vs_ 24hr untreated	6.92082	true positive	Zinc Oxide Nanoparticles
Dendritic cells derived from monocytes treated 6hr with 10ug/mL ZnO particles _vs_ 6hr untreated	6.88606	true positive	Zinc Oxide Nanoparticles
T cell Jurkat A3 cells treated 24hr with 25ug/mL methoxyl ZnO particles _vs_ 24hr untreated	6.82391	true positive	Zinc Oxide Nanoparticles
T cell Jurkat A3 cells treated 24hr with 10ug/mL mandelic acid ZnO particles _vs_ 24hr untreated	6.37675	true positive	Zinc Oxide Nanoparticles
Jurkat cells + 0.2mg-l AgNPs 24hr _vs_ untreated	4.88606	true positive	Silver nanoparticles
Hepatic stellate cells 30ug/ml Nanosun ZnO nanoparticle treated 24hr _vs_ untreated	4.36653	true positive	Zinc Oxide Nanoparticles
Foreskin fibroblasts treated 16hr with 40uM ferrous sulfate _vs_ untreated	4.20066	true positive	ferrous sulfate
Jurkat cells + 0.2mg-l Ag ions 24hr _vs_ untreated	4.02687	true positive	Silver
Nasal epithelial cells incubated 4hr with 200uM formaldehyde _vs_ 4hr untreated	4	true negative	Formalin
T cell Jurkat A3 cells treated 24hr with 10ug/mL 3-MPTMS ZnO particles _vs_ 24hr untreated	3.52288	true positive	Zinc Oxide Nanoparticles
Hepatocytes of male donors treated 24hr with 200uM metformin _vs_ 0uM	2.92082	true negative	Metformin
PBMCs of male subjects - high arsenic exposure (median 355ug/L) _vs_ low exposure (median 103ug/L)	2.60206	true positive	arsenic
Hepatocytes of female donors treated 24hr with 200uM indomethacin _vs_ 0uM	2.52288	true negative	Indomethacin
Hepatocytes of female donors treated 8hr with 200uM indomethacin _vs_ 0uM	2.38722	true negative	Indomethacin
Hepatocytes of female donors treated 8hr with 150uM ibuprofen _vs_ 0uM	2.08619	true negative	Ibuprofen
Hepatocytes of male donors treated 8hr with 200uM metformin _vs_ 0uM	1.97881	true negative	Metformin
B-cell lymphoma cell line - pyrithione zinc treated for 6hr _vs_ DMSO control	1.52143	true positive	pyrithione zinc
Hepatocytes of female donors treated 24hr with 150uM sulfasalazine _vs_ 0uM	1.31515	true negative	Sulfasalazine
Hepatocytes of female donors treated 2hr with 200uM valproic acid _vs_ 0uM	1.3098	true negative	Valproic acid
Hepatocytes of female donors treated 8hr with 150uM sulfasalazine _vs_ 0uM	1.27491	true negative	Sulfasalazine
Hepatocytes of female donors treated 8hr with 200uM valproic acid _vs_ 0uM	0.95117	true negative	Valproic acid
NPrEC prostate epithelial cells treated 8hr with cadmium _vs_ untreated	0.494443	true positive	Cadmium
Hepatocytes of female donors treated 24hr with 200uM valproic acid _vs_ 0uM	0.343614	true negative	Valproic acid
Hepatocytes of female donors treated 24hr with 150uM chlorpropamide _vs_ 0uM	0.33677	true negative	Chlorpropamide
Jurkat T-cells 6hr post 1350nM Silver nitrate treatment _vs_ untreated	0	true positive	Silver Nitrate
Hepatocytes of female donors treated 8hr with 200uM acetaminophen _vs_ 0uM	0	true negative	Acetaminophen
Hepatocytes of female donors treated 24hr with 200uM acetaminophen _vs_ 0uM	0	true negative	Acetaminophen
Hepatocytes of female donors treated 2hr with 200uM acetaminophen _vs_ 0uM	0	true negative	Acetaminophen
Hepatocytes of female donors treated 8hr with 150uM chlorpropamide _vs_ 0uM	0	true negative	Chlorpropamide
Breast adenocarcinoma MCF7 cells + 6hr 100uM imidacloprid _vs_ DMSO	0	true negative	Imidacloprid
Hepatocellular carcinoma hepatocyte HepaRG cells + 6hr 100uM imidacloprid _vs_ DMSO	0	true negative	Imidacloprid
Hepatocellular carcinoma hepatocyte HepG2 cells + 6hr 100uM imidacloprid _vs_ DMSO	0	true negative	Imidacloprid
Hepatocytes of female donors treated 2hr with 150uM sulfasalazine _vs_ 0uM	0	true negative	Sulfasalazine
Hepatocytes of female donors treated 2hr with 200uM indomethacin _vs_ 0uM	-0.458171	true negative	Indomethacin
Endometrial adenocarcinoma Ishikawa cells + 6hr 100uM imidacloprid _vs_ DMSO	-1.04624	true negative	Imidacloprid
Hepatocytes of female donors treated 24hr with 150uM ibuprofen _vs_ 0uM	-1.5157	true negative	Ibuprofen

## Sheet: Toxprint_fingerprints
M_DTXSID	atom:element_main_group	atom:element_metal_group_I_II	atom:element_metal_group_III	atom:element_metal_metalloid	atom:element_metal_poor_metal	atom:element_metal_transistion_metal	atom:element_noble_gas	bond:C#N_cyano_acylcyanide	bond:C#N_cyano_cyanamide	bond:C#N_cyano_cyanohydrin	bond:C#N_nitrile_ab-acetylenic	bond:C#N_nitrile_ab-unsaturated	bond:C#N_nitrile_generic	bond:C#N_nitrile_isonitrile	bond:C#N_nitrile	bond:C(~Z)~C~Q_a-haloalcohol	bond:C(~Z)~C~Q_a-halocarbonyl	bond:C(~Z)~C~Q_a-haloether	bond:C(~Z)~C~Q_a-haloketone_perhalo	bond:C(~Z)~C~Q_b-halocarbonyl	bond:C(~Z)~C~Q_haloamine_haloethyl_(N-mustard)	bond:C(~Z)~C~Q_halocarbonyl_dichloro_quinone_(1_2-)	bond:C(~Z)~C~Q_halocarbonyl_dichloro_quinone_(1_4-)	bond:C(~Z)~C~Q_halocarbonyl_dichloro_quinone_(1_5-)	bond:C(~Z)~C~Q_haloether_dibenzodioxin_1-halo	bond:C(~Z)~C~Q_haloether_dibenzodioxin_2-halo	bond:C(~Z)~C~Q_haloether_dibenzodioxin_dichloro_(2_7-)	bond:C(~Z)~C~Q_haloether_dibenzodioxin_tetrachloro_(2_3_7_8-)	bond:C(~Z)~C~Q_haloether_pyrimidine_2-halo-	bond:C(=O)N_carbamate_dithio	bond:C(=O)N_carbamate_thio	bond:C(=O)N_carbamate_thio_generic	bond:C(=O)N_carbamate	bond:C(=O)N_carboxamide_(NH2)	bond:C(=O)N_carboxamide_(NHR)	bond:C(=O)N_carboxamide_(NR2)	bond:C(=O)N_carboxamide_generic	bond:C(=O)N_carboxamide_thio	bond:C(=O)N_dicarboxamide_N-hydroxy	bond:C(=O)O_acidAnhydride	bond:C(=O)O_carboxylicAcid_alkenyl	bond:C(=O)O_carboxylicAcid_alkyl	bond:C(=O)O_carboxylicAcid_aromatic	bond:C(=O)O_carboxylicAcid_generic	bond:C(=O)O_carboxylicEster_4-nitrophenol	bond:C(=O)O_carboxylicEster_acyclic	bond:C(=O)O_carboxylicEster_aliphatic	bond:C(=O)O_carboxylicEster_alkenyl	bond:C(=O)O_carboxylicEster_alkyl
DTXSID2020006	0	0	0	0	0	0	0	0	0	0	0	0	0	0	0	0	0	0	0	0	0	0	0	0	0	0	0	0	0	0	0	0	0	0	1	0	1	0	0	0	0	0	0	0	0	0	0	0	0
DTXSID3020043	0	0	0	0	0	0	0	0	0	0	0	0	0	0	0	0	0	0	0	0	0	0	0	0	0	0	0	0	0	0	0	0	0	0	1	0	1	0	0	0	0	0	0	0	0	0	0	0	0
DTXSID0020074	0	0	0	0	0	0	0	0	0	0	0	0	0	0	0	0	0	0	0	0	0	0	0	0	0	0	0	0	0	0	0	0	0	0	0	0	0	0	0	0	0	1	0	1	0	0	0	0	0
DTXSID5020108	0	0	0	0	0	0	0	0	0	0	0	0	0	0	0	0	0	0	0	0	0	0	0	0	0	0	0	0	0	0	0	0	0	0	0	0	0	0	0	0	0	0	1	1	0	0	1	0	1
DTXSID9020110	0	0	0	0	0	0	0	0	0	0	0	0	0	0	0	0	0	0	0	0	0	0	0	0	0	0	0	0	0	0	0	0	0	0	0	0	0	0	0	0	0	0	0	0	0	0	0	0	0
DTXSID4020113	0	0	0	0	0	0	0	0	0	0	0	0	0	0	0	0	0	0	0	0	0	0	0	0	0	0	0	0	0	0	0	0	0	0	0	0	0	0	0	0	0	0	0	0	0	0	0	0	1
DTXSID4020113	0	0	0	0	0	0	0	0	0	0	0	0	0	0	0	0	0	0	0	0	0	0	0	0	0	0	0	0	0	0	0	0	0	0	0	0	0	0	0	0	0	0	0	0	0	0	0	0	1
DTXSID4020119	0	0	0	0	0	0	0	0	0	0	0	0	0	0	0	0	0	0	0	0	0	0	0	0	0	0	0	0	0	0	0	0	0	0	0	0	0	0	0	0	0	0	0	0	0	0	0	0	0
DTXSID5020231	0	0	0	0	0	0	0	0	0	0	0	0	0	0	0	0	0	0	0	0	0	0	0	0	0	0	0	0	0	0	0	0	0	0	0	0	0	0	0	0	1	0	0	1	0	0	0	0	0
DTXSID9020241	0	0	0	0	0	0	0	0	0	0	0	0	0	0	0	0	0	0	0	0	0	0	0	0	0	0	0	0	0	0	0	0	0	0	1	0	1	0	0	0	0	0	0	0	0	0	0	0	0
DTXSID7020263	0	0	0	0	0	0	0	0	0	0	0	0	0	0	0	0	0	0	0	0	1	0	0	0	0	0	0	0	0	0	0	0	0	0	0	0	0	0	0	0	0	1	0	1	0	0	0	0	0
DTXSID9020322	0	0	0	0	0	0	0	0	0	0	0	0	0	0	0	0	0	0	0	0	0	0	0	0	0	0	0	0	0	0	0	0	0	0	0	0	1	0	0	0	0	0	0	0	0	0	0	0	0
DTXSID0020369	0	0	0	0	0	0	0	0	0	0	0	0	0	0	0	0	0	0	0	0	0	0	0	0	0	0	0	0	0	0	0	0	0	1	0	0	1	0	0	0	0	0	0	0	0	0	0	0	0
DTXSID4020371	0	0	0	0	0	0	0	0	0	0	0	0	0	0	0	0	0	0	0	0	0	0	0	0	0	0	0	0	0	0	0	0	0	0	0	0	0	0	0	0	0	0	0	0	0	0	0	0	0
DTXSID4020379	0	0	0	0	0	0	0	0	0	0	0	0	0	0	0	0	0	0	0	0	0	0	0	0	0	0	0	0	0	0	0	0	0	0	0	0	0	0	0	0	0	0	0	0	0	0	0	0	0
DTXSID3020465	0	0	0	0	0	0	0	0	0	0	0	0	0	0	0	0	0	0	0	0	0	0	0	0	0	0	0	0	0	0	0	0	0	0	0	0	0	0	0	0	0	0	0	0	0	0	0	0	0
DTXSID9020582	0	0	0	0	0	0	0	0	0	0	0	0	0	0	0	0	0	0	0	0	0	0	0	0	0	0	0	0	0	0	0	0	0	0	0	0	0	0	0	0	0	0	0	0	0	0	0	0	0
DTXSID9020615	0	0	0	0	0	0	0	0	0	0	0	0	0	0	0	0	0	0	0	0	0	0	0	0	0	0	0	0	0	0	0	0	0	0	0	0	0	0	0	0	0	1	0	1	0	0	0	0	0
DTXSID2020636	0	0	0	0	0	0	0	0	0	0	0	0	0	0	0	0	0	0	0	0	0	0	0	0	0	0	0	0	0	0	0	0	0	0	0	0	0	0	0	0	0	1	0	1	0	0	0	0	0
DTXSID0020652	0	0	0	0	0	0	0	0	0	0	0	0	0	0	0	0	0	0	0	0	0	0	0	0	0	0	0	0	0	0	0	0	0	0	0	0	0	0	0	0	0	1	0	1	0	0	0	0	0
DTXSID8020674	0	0	0	0	0	0	0	0	0	0	0	0	0	0	0	0	0	0	0	0	0	0	0	0	0	0	0	0	0	0	0	0	0	0	0	0	0	0	0	0	0	0	0	0	0	0	0	0	0
DTXSID2020713	0	0	0	0	0	0	0	0	0	0	0	0	0	0	0	0	0	0	0	0	0	0	0	0	0	0	0	0	0	0	0	0	0	0	0	0	0	0	0	0	0	0	0	0	0	0	0	0	0
DTXSID7020714	0	0	0	0	0	0	0	0	0	0	0	0	0	0	0	0	0	0	0	0	0	0	0	0	0	0	0	0	0	0	0	0	0	0	0	0	0	0	0	0	0	0	0	0	0	0	0	0	0
DTXSID9020740	0	0	0	0	0	0	0	0	0	0	0	0	0	0	0	0	0	0	0	0	0	0	0	0	0	0	0	0	0	0	0	0	0	0	0	0	1	0	0	0	0	1	0	1	0	0	0	0	0
DTXSID8020755	0	0	0	0	0	0	0	0	0	0	0	0	0	0	0	0	0	0	0	0	0	0	0	0	0	0	0	0	0	0	0	0	0	0	0	0	1	0	0	0	0	0	0	0	0	0	0	0	0
DTXSID7020768	0	0	0	0	0	0	0	0	0	0	0	0	0	0	0	0	0	0	0	0	0	0	0	0	0	0	0	0	0	0	0	0	0	0	0	0	0	0	0	0	0	0	0	0	0	0	0	0	0
DTXSID5020784	0	0	0	0	0	0	0	0	0	0	0	0	0	0	0	0	0	0	0	0	0	0	0	0	0	0	0	0	0	0	0	0	0	0	0	0	0	0	0	0	0	0	0	0	0	0	1	0	1
DTXSID0020814	0	0	0	0	0	0	0	0	0	0	0	0	0	0	0	0	0	0	0	0	0	0	0	0	0	0	0	0	0	0	0	0	0	0	0	0	0	0	0	0	0	0	0	0	0	0	0	0	0
DTXSID4020822	0	0	0	0	0	0	0	0	0	0	0	0	0	0	0	0	0	0	0	0	0	0	0	0	0	0	0	0	0	0	0	0	0	0	1	0	1	0	0	0	0	1	0	1	0	0	0	0	0
DTXSID2020892	0	0	0	0	0	0	0	0	0	0	0	0	0	0	0	0	0	0	0	0	0	0	0	0	0	0	0	0	0	0	0	0	0	0	0	0	0	0	0	0	0	0	0	0	0	0	0	0	0
DTXSID9020902	0	0	0	0	0	0	0	0	0	0	0	0	0	0	0	0	0	0	0	0	0	0	0	0	0	0	0	0	0	0	0	0	0	0	0	0	0	0	0	0	0	0	0	0	0	0	0	0	1
DTXSID5020944	0	0	0	0	0	0	0	0	0	0	0	0	0	0	0	0	0	0	0	0	0	0	0	0	0	0	0	0	0	0	0	0	0	0	0	0	1	0	0	0	0	0	0	0	0	0	0	0	0
DTXSID7020972	0	0	0	0	0	0	0	0	0	0	0	0	0	0	0	0	0	0	0	0	0	0	0	0	0	0	0	0	0	0	0	0	0	0	1	0	1	0	0	0	0	0	0	0	0	0	0	0	0
DTXSID6021080	0	0	0	0	0	0	0	0	0	0	0	0	0	0	0	0	0	0	0	0	0	0	0	0	0	0	0	0	0	0	0	0	0	0	0	0	0	0	0	0	0	0	0	0	0	0	0	0	0
DTXSID1021089	0	0	0	0	0	0	0	0	0	0	0	0	0	0	0	0	0	0	0	0	0	0	0	0	0	0	0	0	0	0	0	0	0	0	0	0	0	0	0	0	1	0	0	1	0	0	0	0	0
DTXSID1021116	0	0	0	0	0	0	0	0	0	0	0	0	0	0	0	0	0	0	0	0	0	0	0	0	0	0	0	0	0	0	0	0	0	0	1	0	1	0	0	0	0	0	0	0	0	0	0	0	0
DTXSID6021117	0	0	0	0	0	0	0	0	0	0	0	0	0	0	0	0	0	0	0	0	0	0	0	0	0	0	0	0	0	0	0	0	0	0	0	0	1	0	0	0	0	0	0	0	0	0	0	0	0
DTXSID1021162	0	0	0	0	0	0	0	0	0	0	0	0	0	0	0	0	0	0	0	0	0	0	0	0	0	0	0	0	0	0	0	0	0	0	0	0	0	0	0	0	0	0	0	0	0	0	0	0	1
DTXSID0021179	0	0	0	0	0	0	0	0	0	0	0	0	0	0	0	0	0	0	0	0	0	0	0	0	0	0	0	0	0	0	0	0	0	0	1	0	1	0	0	0	0	0	0	0	0	0	0	0	0
DTXSID9021182	0	0	0	0	0	0	0	0	0	0	0	0	0	0	0	0	0	0	0	0	0	0	0	0	0	0	0	0	0	0	0	0	0	0	0	1	1	0	0	0	0	0	0	0	0	0	0	0	0
DTXSID9021188	0	0	0	0	0	0	0	0	0	0	0	0	0	0	0	0	0	0	0	0	0	0	0	0	0	0	0	0	0	0	0	0	0	0	0	0	0	0	0	0	0	0	1	1	0	0	0	0	0
DTXSID4021189	0	0	0	0	0	0	0	0	0	0	0	0	0	0	0	0	0	0	0	0	0	0	0	0	0	0	0	0	0	0	0	0	0	0	1	0	1	0	0	0	0	0	0	0	0	0	0	0	0
DTXSID8021193	0	0	0	0	0	0	0	0	0	0	0	0	0	0	0	0	0	0	0	0	0	0	0	0	0	0	0	0	0	0	0	0	0	0	0	0	0	0	0	0	0	0	0	0	0	0	0	0	0
DTXSID9021215	0	0	0	0	0	0	0	0	0	0	0	0	0	0	0	0	0	0	0	0	0	0	0	0	0	0	0	0	0	0	0	0	0	1	0	0	1	0	0	0	0	0	0	0	0	0	0	0	0
DTXSID9021217	0	0	0	0	0	0	0	0	0	0	0	0	0	0	0	0	0	0	0	0	0	0	0	0	0	0	0	0	0	0	0	0	0	0	0	0	0	0	0	0	0	0	0	0	0	0	0	0	0
DTXSID4021218	0	0	0	0	0	0	0	0	0	0	0	0	0	0	0	0	0	0	0	0	0	0	0	0	0	0	0	0	0	0	0	0	0	0	0	0	0	0	0	0	0	0	0	0	0	0	0	0	0
DTXSID7021237	0	0	0	0	0	0	0	0	0	0	0	0	0	0	0	0	0	0	0	0	0	0	0	0	0	0	0	0	0	0	0	0	0	0	0	0	0	0	0	0	0	0	0	0	0	0	0	0	1
DTXSID6021242	0	0	0	0	0	0	0	0	0	0	0	0	0	0	0	0	0	0	0	0	0	0	0	0	0	0	0	0	0	0	0	0	0	0	0	0	0	0	0	0	0	0	0	0	0	0	0	1	1
DTXSID5021255	0	0	0	0	0	0	0	0	0	0	0	0	0	0	0	0	0	0	0	0	0	0	0	0	0	0	0	0	0	0	0	0	0	0	0	0	0	0	0	0	0	0	0	0	0	0	0	0	0
DTXSID0021256	0	0	0	0	0	0	0	0	0	0	0	0	0	0	0	0	0	0	0	0	0	0	0	0	0	0	0	0	0	0	0	0	0	0	0	0	0	0	0	0	0	0	1	1	0	0	0	0	0
DTXSID6021290	0	0	0	0	0	0	0	0	0	0	0	0	0	0	0	0	0	0	0	0	0	0	0	0	0	0	0	0	0	0	0	0	0	0	0	0	0	0	0	0	0	0	0	0	0	0	0	0	0
DTXSID6021296	0	0	0	0	0	0	0	0	0	0	0	0	0	0	0	0	0	0	0	0	0	0	0	0	0	0	0	0	0	0	0	0	0	0	0	0	1	0	0	0	0	1	0	1	0	1	1	0	1
DTXSID7021310	0	0	0	0	0	0	0	0	0	0	0	0	0	0	0	0	0	0	0	0	0	0	0	0	0	0	0	0	0	0	0	0	0	0	0	0	0	0	0	0	0	0	0	0	0	0	0	0	0
DTXSID1021322	0	0	0	0	0	0	0	0	0	0	0	0	0	0	0	0	0	0	0	0	0	0	0	0	0	0	0	0	0	1	0	0	0	0	0	0	0	0	0	0	0	0	0	0	0	0	0	0	0
DTXSID5021336	0	0	0	0	0	0	0	0	0	0	0	0	0	0	0	0	0	0	0	0	0	0	0	0	0	0	0	0	0	0	0	0	0	0	0	1	1	0	0	0	0	0	0	0	0	0	0	0	0
DTXSID0021337	0	0	0	0	0	0	0	0	0	0	0	0	0	0	0	0	0	0	0	0	0	0	0	0	0	0	0	0	0	0	0	0	0	0	0	0	0	0	0	0	0	0	0	0	0	0	0	0	0
DTXSID5021338	0	0	0	0	0	0	0	0	0	0	0	0	0	0	0	0	1	0	0	0	0	0	0	0	0	0	0	0	0	0	0	0	0	0	1	0	1	0	0	0	0	0	0	0	0	0	0	0	0
DTXSID3021358	0	0	0	0	0	0	0	0	0	0	0	0	0	0	0	0	0	0	0	0	0	0	0	0	0	0	0	0	0	0	0	0	0	0	0	0	1	0	0	0	0	0	0	0	0	0	0	0	0
DTXSID8021359	0	0	0	0	0	0	0	0	0	0	0	0	0	0	0	0	0	0	0	0	0	0	0	0	0	0	0	0	0	0	0	0	0	0	0	0	1	0	0	0	0	0	0	0	0	0	0	0	0
DTXSID0021389	0	0	0	0	0	0	0	0	0	0	0	0	0	0	0	1	0	0	0	0	0	0	0	0	0	0	0	0	0	0	0	0	0	0	0	0	0	0	0	0	0	0	0	0	0	0	0	0	0
DTXSID9021396	0	0	0	0	0	0	0	0	0	0	0	0	0	0	0	0	0	0	0	0	0	0	0	0	0	0	0	0	0	0	0	0	1	0	0	1	1	0	0	0	0	0	0	0	0	0	0	0	0
DTXSID9021425	0	0	0	0	0	0	0	0	0	0	0	0	0	0	0	0	0	0	0	0	0	0	0	0	0	0	0	0	0	0	0	0	0	0	0	1	1	0	0	0	0	0	0	0	0	0	0	0	0
DTXSID4021478	0	0	0	0	0	0	0	0	0	0	0	0	0	0	0	0	0	0	0	0	0	0	0	0	0	0	0	0	0	0	0	0	0	0	0	0	0	0	0	0	0	0	0	0	0	0	0	0	0
DTXSID8021480	0	0	0	0	0	0	0	0	0	0	0	0	0	0	0	0	0	0	0	0	0	0	0	0	0	0	0	0	0	0	0	0	0	0	0	0	0	0	0	0	0	0	0	0	0	0	0	0	0
DTXSID4021715	0	0	0	0	0	0	0	0	0	0	0	0	0	0	0	0	0	0	0	0	0	0	0	0	0	0	0	0	0	0	0	0	0	0	0	0	0	0	0	0	0	0	0	0	0	0	0	0	0
DTXSID8021777	0	0	0	0	0	0	0	0	0	0	0	0	0	0	0	0	0	0	0	0	0	0	0	0	0	0	0	0	0	0	0	0	0	0	1	0	1	0	0	0	0	0	0	0	0	0	0	0	0
DTXSID8021804	0	0	0	0	0	0	0	0	0	0	0	0	0	0	0	0	0	0	0	0	0	0	0	0	0	0	0	0	0	0	0	0	0	0	0	0	0	0	0	0	0	0	0	0	0	0	0	0	0
DTXSID8022117	0	0	0	0	0	0	0	0	0	0	0	0	0	0	0	0	0	0	0	0	0	0	0	0	0	0	0	0	0	0	0	0	0	0	0	0	0	0	0	0	0	0	0	0	0	0	0	0	0
DTXSID4022369	0	0	0	0	0	0	0	0	0	0	0	0	0	0	0	0	0	0	0	0	0	0	0	0	0	0	0	0	0	0	0	0	0	0	0	0	0	0	0	0	0	0	0	0	0	0	0	0	0
DTXSID4022369	0	0	0	0	0	0	0	0	0	0	0	0	0	0	0	0	0	0	0	0	0	0	0	0	0	0	0	0	0	0	0	0	0	0	0	0	0	0	0	0	0	0	0	0	0	0	0	0	0
DTXSID3022370	0	0	0	0	0	0	0	0	0	0	0	0	0	0	0	0	0	0	0	0	0	0	0	0	0	0	0	0	0	0	0	0	0	0	0	0	0	0	0	0	0	0	0	0	0	0	0	0	0
DTXSID8022371	0	0	0	0	0	0	0	0	0	0	0	0	0	0	0	0	0	0	0	0	0	0	0	0	0	0	0	0	0	0	0	0	0	0	0	0	0	0	0	0	0	0	0	0	0	0	0	0	0
DTXSID7022382	0	0	0	0	0	0	0	0	0	0	0	0	0	0	0	0	0	0	0	0	0	0	0	0	0	0	0	0	0	0	0	0	0	0	0	0	0	0	0	0	0	0	0	0	0	0	0	0	0
DTXSID1022392	0	0	0	0	0	0	0	0	0	0	0	0	0	0	0	0	0	0	0	0	0	0	0	0	0	0	0	0	0	0	0	0	0	0	0	0	0	0	0	0	0	0	0	0	0	0	0	0	0
DTXSID1022396	0	0	0	0	0	0	0	0	0	0	0	0	0	0	0	0	0	0	0	0	0	0	0	0	0	0	0	0	0	0	0	0	0	0	0	0	0	0	0	0	0	0	0	0	0	0	0	0	0
DTXSID8022400	0	0	0	0	0	0	0	0	0	0	0	0	0	0	0	0	0	0	0	0	0	0	0	0	0	0	0	0	0	0	0	0	0	0	0	0	0	0	0	0	0	0	0	0	0	0	0	0	0
DTXSID5022437	0	0	0	0	0	0	0	0	0	0	0	0	0	0	0	0	0	0	0	0	0	0	0	0	0	0	0	0	0	0	0	0	0	0	0	0	0	0	0	0	0	0	0	0	0	0	0	0	0
DTXSID6022474	0	0	0	0	0	0	0	0	0	0	0	0	0	0	0	0	0	0	0	0	0	0	0	0	0	0	0	0	0	0	0	0	0	0	0	0	0	0	0	0	0	0	0	0	0	0	0	0	0
DTXSID6022478	0	0	0	0	0	0	0	0	0	0	0	0	0	0	0	0	0	0	0	0	0	0	0	0	0	0	0	0	0	0	0	0	0	0	0	0	0	0	0	0	0	0	0	0	0	0	0	0	0
DTXSID7022540	0	0	0	0	0	0	0	0	0	0	0	0	0	0	0	0	0	0	0	0	0	0	0	0	0	0	0	0	0	0	0	0	0	0	0	0	1	0	0	0	0	1	0	1	0	1	1	0	1
DTXSID2022541	0	0	0	0	0	0	0	0	0	0	0	0	0	0	0	0	0	0	0	0	0	0	0	0	0	0	0	0	0	0	0	0	0	0	0	0	0	0	0	0	0	0	0	0	0	0	0	1	0
DTXSID7022544	0	0	0	0	0	0	0	0	0	0	0	0	0	0	0	0	0	0	0	0	0	0	0	0	0	0	0	0	0	0	0	0	0	0	1	0	1	0	0	0	0	0	0	0	0	0	0	0	0
DTXSID1022556	0	0	0	0	0	0	0	0	0	0	0	0	0	0	0	0	0	0	0	0	0	0	0	0	0	0	0	0	0	0	0	0	0	0	1	0	1	0	0	0	0	0	0	0	0	0	0	0	0
DTXSID9022576	0	0	0	0	0	0	0	0	0	0	0	0	0	0	0	0	0	0	0	0	0	0	0	0	0	0	0	0	0	0	0	0	0	0	0	0	0	0	0	0	0	0	0	0	0	0	0	0	0
DTXSID8022583	0	0	0	0	0	0	0	0	0	0	0	0	0	0	0	0	0	0	0	0	0	0	0	0	0	0	0	0	0	0	0	0	0	0	0	0	0	0	0	0	0	0	0	0	0	0	0	0	0
DTXSID3022586	0	0	0	0	0	0	0	0	0	0	0	0	0	0	0	0	0	0	0	0	0	0	0	0	0	0	0	0	0	0	0	0	0	0	1	0	1	0	0	0	0	0	0	0	0	0	0	0	0
DTXSID7022592	0	0	0	0	0	0	0	0	0	0	0	0	0	0	0	0	0	0	0	0	0	0	0	0	0	0	0	0	0	0	0	0	0	0	0	0	0	0	0	0	0	0	0	0	0	0	0	0	0
DTXSID7022594	0	0	0	0	0	0	0	0	0	0	0	0	0	0	0	0	0	0	0	0	0	0	0	0	0	0	0	0	0	0	0	0	0	0	0	0	0	0	0	0	0	0	0	0	0	0	0	0	0
DTXSID2022597	0	0	0	0	0	0	0	0	0	0	0	0	0	0	0	0	0	0	0	0	0	0	0	0	0	0	0	0	0	0	0	0	0	0	0	0	0	0	0	0	0	0	0	0	0	0	0	0	0
DTXSID7022598	0	0	0	0	0	0	0	0	0	0	0	0	0	0	0	0	0	0	0	0	0	0	0	0	0	0	0	0	0	0	0	0	0	0	0	0	0	0	0	0	0	0	0	0	0	0	0	0	0
DTXSID9022601	0	0	0	0	0	0	0	0	0	0	0	0	0	0	0	0	0	0	0	0	0	0	0	0	0	0	0	0	0	0	0	0	0	0	0	0	0	0	0	0	0	1	0	1	0	0	1	0	1
DTXSID4022602	0	0	0	0	0	0	0	0	0	0	0	0	0	0	0	0	0	0	0	0	0	0	0	0	0	0	0	0	0	0	0	0	0	0	1	1	1	0	0	0	0	1	0	1	0	0	0	0	0
DTXSID9022603	0	0	0	0	0	0	0	0	0	0	0	0	0	0	0	0	0	0	0	0	0	0	0	0	0	0	0	0	0	0	0	0	0	0	1	0	1	0	0	0	0	0	0	0	0	0	0	0	0
DTXSID3022613	0	0	0	0	0	0	0	0	0	0	0	0	0	0	0	0	0	0	0	0	0	0	0	0	0	0	0	0	0	0	0	0	0	0	0	0	0	0	0	0	0	0	0	0	0	0	0	0	0
DTXSID8022614	0	0	0	0	0	0	0	0	0	0	0	0	0	0	0	0	0	0	0	0	0	0	0	0	0	0	0	0	0	0	0	0	0	0	0	0	0	0	0	0	0	0	0	0	0	0	0	0	0
DTXSID3022617	0	0	0	0	0	0	0	0	0	0	0	0	0	0	0	0	0	0	0	0	0	0	0	0	0	0	0	0	0	0	0	0	0	0	0	0	0	0	0	0	0	0	0	0	0	0	0	1	0
DTXSID7022629	0	0	0	0	0	0	0	0	0	0	0	0	0	0	0	0	0	0	0	0	0	0	0	0	0	0	0	0	0	0	0	0	0	0	0	0	0	0	0	0	0	0	0	0	0	0	0	0	0
DTXSID1022639	0	0	0	0	0	0	0	0	0	0	0	0	0	0	0	0	0	0	0	0	0	0	0	0	0	0	0	0	0	0	0	0	0	0	1	1	1	0	0	0	0	1	0	1	0	0	0	0	0
DTXSID0022640	0	0	0	0	0	0	0	0	0	0	0	0	0	0	0	0	0	0	0	0	0	0	0	0	0	0	0	0	0	0	0	0	0	0	1	0	1	0	0	0	0	1	0	1	0	0	0	0	0
DTXSID5022647	0	0	0	0	0	0	0	0	0	0	0	0	0	0	0	0	0	0	0	0	0	0	0	0	0	0	0	0	0	0	0	0	0	0	0	0	0	0	0	0	0	0	0	0	0	0	0	0	0
DTXSID9022655	0	0	0	0	0	0	0	0	0	0	0	0	0	0	0	0	0	0	0	0	0	0	0	0	0	0	0	0	0	0	0	0	0	0	0	0	0	0	0	0	0	0	0	0	0	0	0	0	0
DTXSID3022663	0	0	0	0	0	0	0	0	0	0	0	0	0	0	0	0	0	0	0	0	0	0	0	0	0	0	0	0	0	0	0	0	0	0	0	0	0	0	0	0	0	0	0	0	0	0	0	0	0
DTXSID6022680	0	0	0	0	0	0	0	0	0	0	0	0	0	0	0	0	0	0	0	0	0	0	0	0	0	0	0	0	0	0	0	0	0	0	0	0	0	0	0	0	0	0	0	0	0	0	0	0	0
DTXSID1022681	0	0	0	0	0	0	0	0	0	0	0	0	0	0	0	0	0	0	0	0	0	0	0	0	0	0	0	0	0	0	0	0	0	0	0	0	0	0	0	0	0	0	0	0	0	0	1	0	1
DTXSID6022682	0	0	0	0	0	0	0	0	0	0	0	0	0	0	0	0	0	0	0	0	0	0	0	0	0	0	0	0	0	0	0	0	0	0	0	0	0	0	0	0	0	0	0	0	0	0	0	0	0
DTXSID0022690	0	0	0	0	0	0	0	0	0	0	0	0	0	0	0	0	0	0	0	0	0	0	0	0	0	0	0	0	0	0	0	0	0	0	0	0	0	0	0	0	0	0	0	0	0	0	0	0	0
DTXSID5022699	0	0	0	0	0	0	0	0	0	0	0	0	0	0	0	0	0	0	0	0	0	0	0	0	0	0	0	0	0	0	0	0	0	0	0	0	0	0	0	0	0	0	1	1	0	0	0	0	0
DTXSID2022703	0	0	0	0	0	0	0	0	0	0	0	0	0	0	0	0	0	0	0	0	0	0	0	0	0	0	0	0	0	0	0	0	0	0	1	0	1	0	0	0	0	0	0	0	0	0	0	0	0
DTXSID7022706	0	0	0	0	0	0	0	0	0	0	0	0	0	0	0	0	0	0	0	0	0	0	0	0	0	0	0	0	0	0	0	0	0	0	0	0	0	0	0	0	0	0	0	0	0	0	0	0	0
DTXSID9022730	0	0	0	0	0	0	0	0	0	0	0	0	0	0	0	0	0	0	0	0	0	0	0	0	0	0	0	0	0	0	0	0	1	0	0	0	1	0	0	0	0	0	0	0	0	0	0	0	0
DTXSID4022733	0	0	0	0	0	0	0	0	0	0	0	0	0	0	0	0	0	0	0	0	0	0	0	0	0	0	0	0	0	0	0	0	0	0	0	0	0	0	0	0	0	1	0	1	0	0	1	0	1
DTXSID3022746	0	0	0	0	0	0	0	0	0	0	0	0	0	0	0	0	0	0	0	0	0	0	0	0	0	0	0	0	0	0	0	0	0	0	1	0	1	0	0	0	0	0	0	0	0	0	0	0	0
DTXSID3022748	0	0	0	0	0	0	0	0	0	0	0	0	0	0	0	0	0	0	0	0	0	0	0	0	0	0	0	0	0	0	0	0	0	0	1	1	1	0	0	0	1	0	0	1	0	0	0	0	0
DTXSID2022753	0	0	0	0	0	0	0	0	0	0	0	0	0	0	0	0	0	0	0	0	0	0	0	0	0	0	0	0	0	0	0	0	0	0	1	1	1	0	0	0	1	0	0	1	0	0	0	0	0
DTXSID7022754	0	0	0	0	0	0	0	0	0	0	0	0	0	0	0	0	0	0	0	0	0	0	0	0	0	0	0	0	0	0	0	0	0	0	1	1	1	0	0	0	1	1	0	1	0	0	0	0	0
DTXSID7022756	0	0	0	0	0	0	0	0	0	0	0	0	1	0	1	0	0	0	0	0	0	0	0	0	0	0	0	0	0	0	0	0	0	0	1	1	1	0	0	0	1	0	0	1	0	0	0	0	0
DTXSID2022759	0	0	0	0	0	0	0	0	0	0	0	0	0	0	0	0	0	0	0	0	0	0	0	0	0	0	0	0	0	0	0	0	0	0	1	1	1	0	0	0	1	0	0	1	0	0	0	0	0
DTXSID1022760	0	0	0	0	0	0	0	0	0	0	0	0	0	0	0	0	0	0	0	0	0	0	0	0	0	0	0	0	0	0	0	0	0	0	1	1	1	0	0	0	1	1	0	1	0	0	0	0	0
DTXSID1022762	0	0	0	0	0	0	0	0	0	0	0	0	0	0	0	0	0	0	0	0	0	0	0	0	0	0	0	0	0	0	0	0	0	1	1	1	1	0	0	0	1	0	0	1	0	0	0	0	0
DTXSID6022763	0	0	0	0	0	0	0	0	0	0	0	0	0	0	0	0	0	0	0	0	0	0	0	0	0	0	0	0	0	0	0	0	0	0	1	1	1	0	0	0	1	0	0	1	0	0	0	0	0
DTXSID1022764	0	0	0	0	0	0	0	0	0	0	0	0	0	0	0	0	0	0	0	0	0	0	0	0	0	0	0	0	0	0	0	0	1	0	1	1	1	0	0	0	1	0	0	1	0	0	0	0	0
DTXSID5022774	0	0	0	0	0	0	0	0	0	0	0	0	0	0	0	0	0	0	0	0	0	0	0	0	0	0	0	0	0	0	0	0	1	0	1	1	1	0	0	0	1	0	0	1	0	0	0	0	0
DTXSID9022780	0	0	0	0	0	0	0	0	0	0	0	0	0	0	0	0	0	0	0	0	0	0	0	0	0	0	0	0	0	0	0	0	0	0	1	1	1	0	0	0	1	0	0	1	0	0	0	0	0
DTXSID4022783	0	0	0	0	0	0	0	0	0	0	0	0	0	0	0	0	0	0	0	0	0	0	0	0	0	0	0	0	0	0	0	0	0	0	1	1	1	0	0	0	1	0	0	1	0	1	1	0	1
DTXSID4022787	0	0	0	0	0	0	0	0	0	0	0	0	0	0	0	0	0	0	0	0	0	0	0	0	0	0	0	0	0	0	0	0	0	0	0	0	0	0	0	0	0	1	0	1	0	0	0	0	0
DTXSID3022798	0	0	0	0	0	0	0	0	0	0	0	0	0	0	0	0	0	0	0	0	0	0	0	0	0	0	0	0	0	0	0	0	0	0	0	1	1	0	0	0	0	0	0	0	0	0	0	0	0
DTXSID0022808	0	0	0	0	0	0	0	0	0	0	0	0	0	0	0	0	0	0	0	0	0	0	0	0	0	0	0	0	0	0	0	0	0	0	0	0	0	0	0	0	0	0	0	0	0	0	0	0	0
DTXSID0022808	0	0	0	0	0	0	0	0	0	0	0	0	0	0	0	0	0	0	0	0	0	0	0	0	0	0	0	0	0	0	0	0	0	0	0	0	0	0	0	0	0	0	0	0	0	0	0	0	0
DTXSID4022810	0	0	0	0	0	0	0	0	0	0	0	0	0	0	0	0	0	0	0	0	0	0	0	0	0	0	0	0	0	0	0	0	0	0	0	0	0	0	0	0	0	0	0	0	0	0	0	0	0
DTXSID9022811	0	0	0	0	0	0	0	0	0	0	0	0	0	0	0	0	0	0	0	0	0	0	0	0	0	0	0	0	0	0	0	0	0	1	0	0	1	0	0	0	0	0	0	0	0	0	0	0	0
DTXSID4022812	0	0	0	0	0	0	0	0	0	0	0	0	0	0	0	0	0	0	0	0	0	0	0	0	0	0	0	0	0	0	0	0	0	0	1	0	1	0	0	0	0	0	0	0	0	0	0	0	0
DTXSID9022813	0	0	0	0	0	0	0	0	0	0	0	0	0	0	0	0	0	0	0	0	0	0	0	0	0	0	0	0	0	0	0	0	1	0	0	0	1	0	0	0	0	0	0	0	0	0	0	0	0
DTXSID3022821	0	0	0	0	0	0	0	0	0	0	0	0	0	0	0	0	0	0	0	0	0	0	0	0	0	0	0	0	0	0	0	0	0	0	0	0	0	0	0	0	0	0	0	0	0	0	0	0	0
DTXSID8022822	0	0	0	0	0	0	0	0	0	0	0	0	0	0	0	0	0	0	0	0	0	0	0	0	0	0	0	0	0	0	0	0	0	0	0	0	0	0	0	0	0	0	0	1	0	0	0	0	0
DTXSID8022824	0	0	0	0	0	0	0	0	0	0	0	0	0	0	0	0	0	0	0	0	0	0	0	0	0	0	0	0	0	0	0	0	0	0	0	0	0	0	0	0	1	0	0	1	0	0	0	0	0
DTXSID3022825	0	0	0	0	0	0	0	0	0	0	0	0	0	0	0	0	0	0	0	0	0	0	0	0	0	0	0	0	0	0	0	0	0	0	1	0	1	0	0	0	0	0	0	0	0	0	0	0	0
DTXSID7022833	0	0	0	0	0	0	0	0	0	0	0	0	0	0	0	0	0	0	0	0	0	0	0	0	0	0	0	0	0	0	0	0	0	0	0	0	0	0	0	0	0	0	0	0	0	0	0	0	0
DTXSID2022836	0	0	0	0	0	0	0	0	0	0	0	0	0	0	0	0	0	0	0	0	0	0	0	0	0	0	0	0	0	0	0	0	0	0	1	0	1	0	0	0	0	0	0	0	0	0	0	0	0
DTXSID7022837	0	0	0	0	0	0	0	0	0	0	0	0	0	0	0	0	0	0	0	0	0	0	0	0	0	0	0	0	0	0	0	0	0	0	0	0	0	0	0	0	0	0	0	0	0	0	0	0	0
DTXSID7022839	0	0	0	0	0	0	0	0	0	0	0	0	0	0	0	0	0	0	0	0	0	0	0	0	0	0	0	0	0	0	0	0	0	0	0	0	0	0	0	0	0	0	0	0	0	0	0	0	0
DTXSID1022847	0	0	0	0	0	0	0	0	0	0	0	0	0	0	0	0	0	0	0	0	0	0	0	0	0	0	0	0	0	0	0	0	0	0	0	0	1	0	0	0	0	0	0	0	0	0	0	0	0
DTXSID5022853	0	0	0	0	0	0	0	0	0	0	0	0	0	0	0	0	0	0	0	0	0	0	0	0	0	0	0	0	0	0	0	0	0	0	1	1	1	0	0	0	0	1	0	1	0	0	0	0	0
DTXSID5022855	0	0	0	0	0	0	0	0	0	0	0	0	0	0	0	0	0	0	0	0	0	0	0	0	0	0	0	0	0	0	0	0	0	0	0	0	0	0	0	0	0	0	0	0	0	0	0	0	0
DTXSID4022864	0	0	0	0	0	0	0	0	0	0	0	0	0	0	0	0	0	0	0	0	0	0	0	0	0	0	0	0	0	0	0	0	0	0	0	0	0	0	0	0	0	0	0	0	0	0	0	0	0
DTXSID4022868	0	0	0	0	0	0	0	0	0	0	0	0	0	0	0	0	0	0	0	0	0	0	0	0	0	0	0	0	0	0	0	0	0	0	0	0	0	0	0	0	0	0	0	0	0	0	0	0	0
DTXSID8022872	0	0	0	0	0	0	0	0	0	0	0	0	0	0	0	0	0	0	0	0	0	0	0	0	0	0	0	0	0	0	0	0	0	0	0	0	0	0	0	0	0	0	0	0	0	0	0	0	0
DTXSID2022880	0	0	0	0	0	0	0	0	0	0	0	0	0	0	0	0	0	0	0	0	0	0	0	0	0	0	0	0	0	0	0	0	0	0	0	0	0	0	0	0	0	0	0	0	0	0	0	0	0
DTXSID7022881	0	0	0	0	0	0	0	0	0	0	0	0	0	0	0	0	0	0	0	0	0	0	0	0	0	0	0	0	0	0	0	0	0	0	1	0	1	0	0	0	0	0	0	0	0	0	0	0	0
DTXSID2022888	0	0	0	0	0	0	0	0	0	0	0	0	0	0	0	0	0	0	0	0	0	0	0	0	0	0	0	0	0	0	0	0	0	0	0	0	0	0	0	0	0	1	0	1	0	0	0	0	0
DTXSID1022893	0	0	0	0	0	0	0	0	0	0	0	0	0	0	0	0	0	0	0	0	0	0	0	0	0	0	0	0	0	0	0	0	0	1	0	0	1	0	0	0	0	0	0	0	0	0	0	0	0
DTXSID3022908	0	0	0	0	0	0	0	0	0	0	0	0	0	0	0	0	0	0	0	0	0	0	0	0	0	0	0	0	0	0	0	0	0	0	0	0	0	0	0	0	0	0	0	0	0	0	0	0	0
DTXSID7022914	0	0	0	0	0	0	0	0	0	0	0	0	0	0	0	0	0	0	0	0	0	0	0	0	0	0	0	0	0	0	0	0	0	0	0	0	0	0	0	0	0	0	0	0	0	0	0	0	0
DTXSID6022923	0	0	0	0	0	0	0	0	0	0	0	0	0	0	0	0	0	0	0	0	0	0	0	0	0	0	0	0	0	0	0	0	0	0	0	0	0	0	0	0	0	1	0	1	0	0	0	0	0
DTXSID1022924	0	0	0	0	0	0	0	0	0	0	0	0	0	0	0	0	0	0	0	0	0	0	0	0	0	0	0	0	0	0	0	0	0	0	1	1	1	0	0	0	0	1	0	1	0	0	0	0	0
DTXSID5022932	0	0	0	0	0	0	0	0	0	0	0	0	0	0	0	0	0	0	0	0	0	0	0	0	0	0	0	0	0	0	0	0	0	0	0	0	0	0	0	0	0	0	1	1	0	0	0	0	0
DTXSID5022934	0	0	0	0	0	0	0	0	0	0	0	0	0	0	0	0	0	0	0	0	0	0	0	0	0	0	0	0	0	0	0	0	0	0	0	0	0	0	0	0	0	0	0	0	0	0	0	1	0
DTXSID9022946	0	0	0	0	0	0	0	0	0	0	0	0	0	0	0	0	0	0	0	0	0	0	0	0	0	0	0	0	0	0	0	0	0	0	0	0	0	0	0	0	0	1	0	1	0	0	0	0	0
DTXSID9022948	0	0	0	0	0	0	0	0	0	0	0	0	0	0	0	0	0	0	0	0	0	0	0	0	0	0	0	0	0	0	0	0	0	0	0	0	0	0	0	0	0	0	0	0	0	0	0	0	0
DTXSID4022949	0	0	0	0	0	0	0	0	0	0	0	0	0	0	0	0	0	0	0	0	0	0	0	0	0	0	0	0	0	0	0	0	0	0	0	0	0	0	0	0	0	0	0	0	0	0	0	0	0
DTXSID3022952	0	0	0	0	0	0	0	0	0	0	0	0	0	0	0	0	0	0	0	0	0	0	0	0	0	0	0	0	0	0	0	0	0	0	0	0	0	0	0	0	0	0	0	0	0	0	0	0	0
DTXSID7022960	0	0	0	0	0	0	0	0	0	0	0	0	0	0	0	0	0	0	0	0	0	0	0	0	0	0	0	0	0	0	0	0	0	0	0	0	0	0	0	0	0	0	0	0	0	0	0	0	0
DTXSID7022964	0	0	0	0	0	0	0	0	0	0	0	0	0	0	0	0	0	0	0	0	0	0	0	0	0	0	0	0	0	0	0	0	0	0	0	1	1	0	0	0	0	0	0	0	0	0	0	0	0
DTXSID7022966	0	0	0	0	0	0	0	0	0	0	0	0	0	0	0	0	0	0	0	0	0	0	0	0	0	0	0	0	0	0	0	0	0	0	0	0	0	0	0	0	0	0	0	0	0	0	0	0	0
DTXSID1022970	0	0	0	0	0	0	0	0	0	0	0	0	0	0	0	0	0	0	0	0	0	0	0	0	0	0	0	0	0	0	0	0	0	0	0	0	0	0	0	0	0	0	0	0	0	0	0	0	0
DTXSID5022980	0	0	0	0	0	0	0	0	0	0	0	0	0	0	0	0	0	0	0	0	0	0	0	0	0	0	0	0	0	0	0	0	0	0	0	0	0	0	0	0	0	0	0	0	0	0	0	0	0
DTXSID4022991	0	0	0	0	0	0	0	0	0	0	0	0	0	0	0	0	0	0	0	0	0	0	0	0	0	0	0	0	0	0	0	0	0	0	0	0	0	0	0	0	0	0	0	0	0	0	0	0	1
DTXSID3023005	0	0	0	0	0	0	0	0	0	0	0	0	0	0	0	0	0	0	0	0	0	0	0	0	0	0	0	0	0	0	0	0	0	0	0	0	0	0	0	0	0	0	0	0	0	0	0	0	0
DTXSID8023006	0	0	0	0	0	0	0	0	0	0	0	0	0	0	0	0	0	0	0	0	0	0	0	0	0	0	0	0	0	0	0	0	0	0	0	0	0	0	0	0	0	0	0	0	0	0	0	0	0
DTXSID3023007	0	0	0	0	0	0	0	0	0	0	0	0	0	0	0	0	0	0	0	0	0	0	0	0	0	0	0	0	0	0	0	0	0	0	0	1	1	0	0	0	0	0	0	0	0	0	0	0	0
DTXSID3023009	0	0	0	0	0	0	0	0	0	0	0	0	0	0	0	0	0	0	0	0	0	0	0	0	0	0	0	0	0	0	0	0	0	0	0	0	0	0	0	0	0	0	0	0	0	0	0	0	0
DTXSID2023016	0	0	0	0	0	0	0	0	0	0	0	0	0	0	0	0	0	0	0	0	0	0	0	0	0	0	0	0	0	0	0	0	0	0	0	0	0	0	0	0	0	0	0	0	0	0	0	0	0
DTXSID7023019	0	0	0	0	0	0	0	0	0	0	0	0	0	0	0	0	0	0	0	0	0	0	0	0	0	0	0	0	0	0	0	0	0	0	1	0	1	0	0	0	0	0	0	0	0	0	0	0	0
DTXSID6023020	0	0	0	0	0	0	0	0	0	0	0	0	0	0	0	0	0	0	0	0	0	0	0	0	0	0	0	0	0	0	0	0	0	0	0	1	1	0	0	0	0	0	0	0	0	0	0	0	0
DTXSID1023029	0	0	0	0	0	0	0	0	0	0	0	0	0	0	0	0	0	0	0	0	0	0	0	0	0	0	0	0	0	0	0	0	0	0	0	0	0	0	0	0	0	0	0	0	0	0	0	0	0
DTXSID5023031	0	0	0	0	0	0	0	0	0	0	0	0	0	0	0	0	0	0	0	0	0	0	0	0	0	0	0	0	0	0	0	0	0	0	0	1	1	0	0	0	0	0	0	0	0	0	0	0	0
DTXSID5023033	0	0	0	0	0	0	0	0	0	0	0	0	0	0	0	0	0	0	0	0	0	0	0	0	0	0	0	0	0	0	0	0	0	0	0	0	0	0	0	0	0	0	0	0	0	0	0	0	0
DTXSID5023039	0	0	0	0	0	0	0	0	0	0	0	0	0	0	0	0	0	0	0	0	0	0	0	0	0	0	0	0	0	0	0	0	0	0	0	0	0	0	0	0	0	0	0	0	0	0	0	0	0
DTXSID4023042	0	0	0	0	0	0	0	0	0	0	0	0	0	0	0	0	0	0	0	0	0	0	0	0	0	0	0	0	0	0	0	0	0	0	0	0	0	0	0	0	0	0	0	0	0	0	0	1	0
DTXSID9023045	0	0	0	0	0	0	0	0	0	0	0	0	0	0	0	0	0	0	0	0	0	0	0	0	0	0	0	0	0	0	0	0	0	0	0	0	0	0	0	0	0	1	0	1	0	0	0	0	0
DTXSID4023046	0	0	0	0	0	0	0	0	0	0	0	0	0	0	0	0	0	0	0	0	0	0	0	0	0	0	0	0	0	0	0	0	0	0	0	0	0	0	0	0	0	0	0	0	0	0	0	0	0
DTXSID4023048	0	0	0	0	0	0	0	0	0	0	0	0	0	0	0	0	0	0	0	0	0	0	0	0	0	0	0	0	0	0	0	0	1	0	0	0	1	0	0	0	0	0	0	0	0	0	0	0	0
DTXSID8023056	0	0	0	0	0	0	0	0	0	0	0	0	0	0	0	0	0	0	0	0	0	0	0	0	0	0	0	0	0	0	0	0	0	0	1	1	1	0	0	0	0	1	0	1	0	0	0	0	0
DTXSID3023059	0	0	0	0	0	0	0	0	0	0	0	0	0	0	0	0	0	0	0	0	0	0	0	0	0	0	0	0	0	0	0	0	0	0	0	0	1	0	0	0	0	0	0	0	0	0	0	0	0
DTXSID7023061	0	0	0	0	0	0	0	0	0	0	0	0	0	0	0	1	0	0	0	0	0	0	0	0	0	0	0	0	0	0	0	0	0	0	0	0	0	0	0	0	0	0	0	0	0	0	0	0	0
DTXSID7023063	0	0	0	0	0	0	0	0	0	0	0	0	0	0	0	0	0	0	0	0	0	0	0	0	0	0	0	0	0	0	0	0	0	0	0	0	0	0	0	0	0	0	1	1	0	0	0	0	0
DTXSID2023068	0	0	0	0	0	0	0	0	0	0	0	0	0	0	0	0	0	0	0	0	0	0	0	0	0	0	0	0	0	0	0	0	0	0	0	0	0	0	0	0	0	0	0	0	0	0	0	0	0
DTXSID5023085	0	0	0	0	0	0	0	0	0	0	0	0	0	0	0	0	0	0	0	0	0	0	0	0	0	0	0	0	0	0	0	0	0	0	0	0	0	0	0	0	0	0	1	1	0	0	0	0	0
DTXSID0023086	0	0	0	0	0	0	0	0	0	0	0	0	0	0	0	0	0	0	0	0	0	0	0	0	0	0	0	0	0	0	0	0	0	0	0	0	0	0	0	0	1	0	0	1	0	0	1	0	1
DTXSID5023089	0	0	0	0	0	0	0	0	0	0	0	0	0	0	0	0	0	0	0	0	0	0	0	0	0	0	0	0	0	0	0	0	0	0	0	0	0	0	0	0	0	0	0	0	0	0	0	0	0
DTXSID9023095	0	0	0	0	0	0	0	0	0	0	0	0	0	0	0	0	0	0	0	0	0	0	0	0	0	0	0	0	0	0	0	0	0	0	0	0	1	0	0	0	0	0	0	0	0	0	0	0	0
DTXSID5023110	0	0	0	0	0	0	0	0	0	0	0	0	0	0	0	0	0	0	0	0	0	0	0	0	0	0	0	0	0	0	0	0	0	0	0	0	0	0	0	0	0	0	0	0	0	0	0	0	0
DTXSID5023116	0	0	0	0	0	0	0	0	0	0	0	0	0	0	0	0	0	0	0	0	0	0	0	0	0	0	0	0	0	0	0	0	0	0	0	0	0	0	0	0	0	0	0	0	0	0	0	0	0
DTXSID0023119	0	0	0	0	0	0	0	0	0	0	0	0	0	0	0	0	0	0	0	0	0	0	0	0	0	0	0	0	0	0	0	0	0	0	0	0	0	0	0	0	0	0	0	0	0	0	0	0	0
DTXSID4023129	0	0	0	0	0	0	0	0	0	0	0	0	0	0	0	0	0	0	0	0	0	0	0	0	0	0	0	0	0	0	0	0	0	0	0	0	0	0	0	0	0	0	0	0	0	0	0	0	0
DTXSID3023132	0	0	0	0	0	0	0	0	0	0	0	0	0	0	0	0	0	0	0	0	0	0	0	0	0	0	0	0	0	0	0	0	0	0	0	0	0	0	0	0	0	0	0	0	0	0	0	0	0
DTXSID8023137	0	0	0	0	0	0	0	0	0	0	0	0	0	0	0	0	0	0	0	0	0	0	0	0	0	0	0	0	0	0	0	0	0	0	0	0	0	0	0	0	0	0	0	0	0	0	0	0	0
DTXSID2023143	0	0	0	0	0	0	0	0	0	0	0	0	0	0	0	0	0	0	0	0	0	0	0	0	0	0	0	0	0	0	0	0	0	0	0	1	1	0	0	0	1	0	0	1	0	0	0	0	0
DTXSID2023149	0	0	0	0	0	0	0	0	0	0	0	0	0	0	0	0	0	0	0	0	0	0	0	0	0	0	0	0	0	0	0	0	0	0	0	1	1	0	0	0	0	1	0	1	0	0	0	0	0
DTXSID6023157	0	0	0	0	0	0	0	0	0	0	0	0	0	0	0	0	0	0	0	0	0	0	0	0	0	0	0	0	0	0	0	0	0	0	1	1	1	0	0	0	0	0	0	0	0	0	0	0	0
DTXSID1023158	0	0	0	0	0	0	0	0	0	0	0	0	0	0	0	0	0	0	0	0	0	0	0	0	0	0	0	0	0	0	0	0	0	0	1	0	1	0	0	0	0	0	0	0	0	0	0	0	0
DTXSID6023159	0	0	0	0	0	0	0	0	0	0	0	0	0	0	0	0	0	0	0	0	0	0	0	0	0	0	0	0	0	0	0	0	0	0	0	0	0	0	0	0	0	1	0	1	0	0	0	0	0
DTXSID0023163	0	0	0	0	0	0	0	0	0	0	0	0	0	0	0	0	0	0	0	0	0	0	0	0	0	0	0	0	0	0	0	0	0	0	1	1	1	0	0	0	0	0	0	0	0	0	0	0	0
DTXSID4023175	0	0	0	0	0	0	0	0	0	0	0	0	0	0	0	0	0	0	0	0	0	0	0	0	0	0	0	0	0	0	0	0	0	0	0	0	0	0	0	0	0	0	0	0	0	0	0	0	0
DTXSID9023178	0	0	0	0	0	0	0	0	0	0	0	0	0	0	0	0	0	0	0	0	0	0	0	0	0	0	0	0	0	0	0	0	0	0	0	0	0	0	0	0	0	0	0	0	0	0	0	0	0
DTXSID4023179	0	0	0	0	0	0	0	0	0	0	0	0	0	0	0	0	0	0	0	0	0	0	0	0	0	0	0	0	0	0	0	0	0	0	0	0	0	0	0	0	0	0	0	0	0	0	0	1	0
DTXSID8023183	0	0	0	0	0	0	0	0	0	0	0	0	0	0	0	0	0	0	0	0	0	0	0	0	0	0	0	0	0	0	0	0	0	0	0	0	0	0	0	0	0	0	0	0	0	0	1	0	1
DTXSID8023189	0	0	0	0	0	0	0	0	0	0	0	0	0	0	0	0	0	0	0	0	0	0	0	0	0	0	0	0	0	0	0	0	0	0	0	0	0	0	0	0	0	1	0	1	0	0	0	0	0
DTXSID7023190	0	0	0	0	0	0	0	0	0	0	0	0	0	0	0	0	0	0	0	0	0	0	0	0	0	0	0	0	0	0	0	0	0	0	0	0	0	0	0	0	0	0	0	0	0	0	0	0	0
DTXSID2023191	0	0	0	0	0	0	0	0	0	0	0	0	0	0	0	0	0	0	0	0	0	0	0	0	0	0	0	0	0	0	0	0	0	1	0	0	1	0	0	0	0	0	0	0	0	0	0	0	0
DTXSID7023198	0	0	0	0	0	0	0	0	0	0	0	0	0	0	0	0	0	0	0	0	0	0	0	0	0	0	0	0	0	0	0	0	0	0	0	0	0	0	0	0	0	0	0	0	0	0	1	1	1
DTXSID4023200	0	0	0	0	0	0	0	0	0	0	0	0	0	0	0	0	0	0	0	0	0	0	0	0	0	0	0	0	0	0	0	0	0	0	0	0	0	0	0	0	0	0	0	0	0	0	0	0	0
DTXSID9023201	0	0	0	0	0	0	0	0	0	0	0	0	0	0	0	0	0	0	0	0	0	0	0	0	0	0	0	0	0	0	0	0	0	0	1	0	1	0	0	0	0	0	0	0	0	0	0	0	0
DTXSID4023206	0	0	0	0	0	0	0	0	0	0	0	0	0	0	0	0	0	0	0	0	0	0	0	0	0	0	0	0	0	0	0	0	0	0	0	0	0	0	0	0	0	0	0	0	0	0	0	0	0
DTXSID8023212	0	0	0	0	0	0	0	0	0	0	0	0	0	0	0	0	0	0	0	0	0	0	0	0	0	0	0	0	0	0	0	0	0	0	0	0	0	0	0	0	0	0	0	0	0	1	1	0	1
DTXSID3023217	0	0	0	0	0	0	0	0	0	0	0	0	0	0	0	0	0	0	0	0	0	0	0	0	0	0	0	0	0	0	0	0	0	0	0	0	1	0	0	0	0	0	0	0	0	0	0	0	0
DTXSID3023219	0	0	0	0	0	0	0	0	0	0	0	0	0	0	0	0	0	0	0	0	0	0	0	0	0	0	0	0	0	0	0	0	0	0	0	0	0	0	0	0	0	0	0	0	0	0	0	0	0
DTXSID7023229	0	0	0	0	0	0	0	0	0	0	0	0	0	0	0	0	0	0	0	0	0	0	0	0	0	0	0	0	0	0	0	0	0	0	0	0	0	0	0	0	0	0	0	0	0	0	0	0	0
DTXSID6023238	0	0	0	0	0	0	0	0	0	0	0	0	0	0	0	0	0	0	0	0	0	0	0	0	0	0	0	0	0	0	0	0	0	0	0	0	0	0	0	0	0	0	0	0	0	0	0	0	0
DTXSID3023265	0	0	0	0	0	0	0	0	0	0	0	0	0	0	0	0	0	0	0	0	0	0	0	0	0	0	0	0	0	0	0	0	0	0	0	0	0	0	0	0	0	0	0	0	0	0	0	0	0
DTXSID7023271	0	0	0	0	0	0	0	0	0	0	0	0	0	0	0	0	0	0	0	0	0	0	0	0	0	0	0	0	0	0	0	0	0	0	0	0	0	0	0	0	0	0	0	0	0	1	1	0	1
DTXSID2023272	0	0	0	0	0	0	0	0	0	0	0	0	0	0	0	0	0	0	0	0	0	0	0	0	0	0	0	0	0	0	0	0	0	1	0	0	1	0	0	0	0	0	0	0	0	0	0	0	0
DTXSID2023278	0	0	0	0	0	0	0	0	0	0	0	0	0	0	0	0	0	0	0	0	0	0	0	0	0	0	0	0	0	0	0	0	0	0	0	0	0	0	0	0	0	0	0	0	0	0	0	0	0
DTXSID1023281	0	0	0	0	0	0	0	0	0	0	0	0	0	0	0	0	0	0	0	0	0	0	0	0	0	0	0	0	0	0	0	0	0	0	0	0	1	0	0	0	0	0	0	0	0	0	0	0	0
DTXSID2023309	0	0	0	0	0	0	0	0	0	0	0	0	0	0	0	0	0	0	0	0	0	0	0	0	0	0	0	0	0	0	0	0	0	0	0	0	0	0	0	0	0	0	0	0	0	0	0	0	0
DTXSID1023310	0	0	0	0	0	0	0	0	0	0	0	0	0	0	0	0	0	0	0	0	0	0	0	0	0	0	0	0	0	0	0	0	0	0	1	1	1	0	0	0	0	0	0	0	0	0	0	0	0
DTXSID6023317	0	0	0	0	0	0	0	0	0	0	0	0	0	0	0	0	0	0	0	0	0	0	0	0	0	0	0	0	0	0	0	0	0	0	0	0	0	0	0	0	0	0	0	0	0	0	0	0	0
DTXSID0023321	0	0	0	0	0	0	0	0	0	0	0	0	0	0	0	0	0	0	0	0	0	0	0	0	0	0	0	0	0	0	0	0	0	0	1	0	1	0	0	0	0	0	0	0	0	0	0	0	0
DTXSID5023322	0	0	0	0	0	0	0	0	0	0	0	0	0	0	0	0	0	0	0	0	0	0	0	0	0	0	0	0	0	0	0	0	0	0	0	0	0	0	0	0	0	0	0	0	0	0	0	0	0
DTXSID5023324	0	0	0	0	0	0	0	0	0	0	0	1	1	0	1	0	0	0	0	0	0	0	0	0	0	0	0	0	0	0	0	0	0	0	1	0	1	0	0	0	0	0	0	0	0	0	0	0	0
DTXSID4023333	0	0	0	0	0	0	0	0	0	0	0	0	0	0	0	1	1	0	0	0	0	0	0	0	0	0	0	0	0	0	0	0	0	0	0	0	0	0	0	0	0	0	0	0	0	0	0	0	0
DTXSID4023335	0	0	0	0	0	0	0	0	0	0	0	0	0	0	0	0	0	0	0	0	0	0	0	0	0	0	0	0	0	0	0	0	1	0	0	1	1	0	0	0	0	0	0	0	0	0	0	0	0
DTXSID3023342	0	0	0	0	0	0	0	0	0	0	0	0	0	0	0	0	0	0	0	0	0	0	0	0	0	0	0	0	0	0	0	0	0	0	0	0	0	0	0	0	0	0	0	0	0	0	0	0	0
DTXSID8023343	0	0	0	0	0	0	0	0	0	0	0	0	0	0	0	0	0	0	0	0	0	0	0	0	0	0	0	0	0	0	0	0	0	0	1	1	1	0	0	0	0	1	0	1	0	0	0	0	0
DTXSID3023344	0	0	0	0	0	0	0	0	0	0	0	0	0	0	0	0	0	0	0	0	0	0	0	0	0	0	0	0	0	0	0	0	0	0	0	0	0	0	0	0	0	0	0	0	0	1	0	0	1
DTXSID8023345	0	0	0	0	0	0	0	0	0	0	0	0	0	0	0	0	0	0	0	0	0	0	0	0	0	0	0	0	0	0	0	0	0	0	0	0	0	0	0	0	0	0	0	0	0	0	0	0	0
DTXSID1023360	0	0	0	0	0	0	0	0	0	0	0	0	0	0	0	0	0	0	0	0	0	0	0	0	0	0	0	0	0	0	0	0	1	0	0	0	1	0	0	0	0	0	0	0	0	0	0	0	0
DTXSID1023368	0	0	0	0	0	0	0	0	0	0	0	0	0	0	0	0	0	0	0	0	0	0	0	0	0	0	0	0	0	0	0	0	0	0	0	0	0	0	0	0	0	0	1	1	0	0	0	0	0
DTXSID0023373	0	0	0	0	0	0	0	0	0	0	0	0	0	0	0	0	0	0	0	0	0	0	0	0	0	0	0	0	0	0	0	0	0	0	0	0	0	0	0	0	0	0	0	0	0	0	0	1	0
DTXSID5023376	0	0	0	0	0	0	0	0	0	0	0	0	0	0	0	0	0	0	0	0	0	0	0	0	0	0	0	0	0	0	0	0	0	0	0	0	0	0	0	0	0	0	0	0	0	0	0	0	0
DTXSID4023389	0	0	0	0	0	0	0	0	0	0	0	0	0	0	0	0	0	0	0	0	0	0	0	0	0	0	0	0	0	0	0	0	0	0	0	0	0	0	0	0	0	0	0	0	0	0	0	0	1
DTXSID8023393	0	0	0	0	0	0	0	0	0	0	0	0	0	0	0	0	0	0	0	0	0	0	0	0	0	0	0	0	0	0	0	0	0	0	0	0	0	0	0	0	0	0	0	0	0	0	0	0	0
DTXSID3023396	0	0	0	0	0	0	0	0	0	0	0	0	0	0	0	0	0	0	0	0	0	0	0	0	0	0	0	0	0	0	0	0	0	0	0	0	0	0	0	0	0	0	0	0	0	0	0	0	0
DTXSID3023398	0	0	0	0	0	0	0	0	0	0	0	0	0	0	0	0	0	0	0	0	0	0	0	0	0	0	0	0	0	0	0	0	0	0	0	0	0	0	0	0	0	0	0	0	0	0	0	0	0
DTXSID5023403	0	0	0	0	0	0	0	0	0	0	0	0	0	0	0	0	0	0	0	0	0	0	0	0	0	0	0	0	0	0	0	0	0	0	0	0	0	0	0	0	0	0	0	0	0	0	0	0	0
DTXSID9023413	0	0	0	0	0	0	0	0	0	0	0	0	0	0	0	0	0	0	0	0	0	0	0	0	0	0	0	0	0	0	0	0	0	0	1	0	1	0	0	0	0	0	0	0	0	0	1	0	1
DTXSID4023418	0	0	0	0	0	0	0	0	0	0	0	0	0	0	0	0	0	0	0	0	0	0	0	0	0	0	0	0	0	0	0	0	0	0	0	0	0	0	0	0	0	0	0	0	0	0	0	0	0
DTXSID3023423	0	0	0	0	0	0	0	0	0	0	0	0	0	0	0	0	0	0	0	0	0	0	0	0	0	0	0	0	0	0	0	0	0	0	0	0	0	0	0	0	0	0	0	0	0	0	0	0	0
DTXSID8023424	0	0	0	0	0	0	0	0	0	0	0	0	0	0	0	0	0	0	0	0	0	0	0	0	0	0	0	0	0	0	0	0	0	0	0	0	0	0	0	0	0	0	0	0	0	0	0	0	0
DTXSID3023425	0	0	0	0	0	0	0	0	0	0	0	0	0	0	0	0	0	0	0	0	0	0	0	0	0	0	0	0	0	0	0	0	0	0	0	0	0	0	0	0	0	0	0	0	0	0	0	0	0
DTXSID7023431	0	0	0	0	0	0	0	0	0	0	0	0	0	0	0	0	0	0	0	0	0	0	0	0	0	0	0	0	0	0	0	0	0	0	0	0	0	0	0	0	0	0	0	0	0	0	0	0	0
DTXSID2023434	0	0	0	0	0	0	0	0	0	0	0	0	0	0	0	0	0	0	0	0	0	0	0	0	0	0	0	0	0	0	0	0	0	0	0	0	0	0	0	0	0	1	0	1	0	0	0	0	0
DTXSID7023437	0	0	0	0	0	0	0	0	0	0	0	0	0	0	0	0	0	0	0	0	0	0	0	0	0	0	0	0	0	0	0	0	0	0	0	1	1	0	0	0	0	0	0	0	0	0	0	0	0
DTXSID7023439	0	0	0	0	0	0	0	0	0	0	0	0	0	0	0	0	0	0	0	0	0	0	0	0	0	0	0	0	0	0	0	0	0	0	0	0	0	0	0	0	0	0	0	0	0	0	0	0	0
DTXSID1023441	0	0	0	0	0	0	0	0	0	0	0	0	0	0	0	0	0	0	0	0	0	0	0	0	0	0	0	0	0	0	0	0	0	0	0	0	0	0	0	0	0	0	0	0	0	0	0	0	0
DTXSID6023448	0	0	0	0	0	0	0	0	0	0	0	0	0	0	0	0	0	0	0	0	0	0	0	0	0	0	0	0	0	0	0	0	0	0	1	1	1	0	0	0	0	1	0	1	0	0	0	0	0
DTXSID1023449	0	0	0	0	0	0	0	0	0	0	0	0	0	0	0	0	0	0	0	0	0	0	0	0	0	0	0	0	0	0	0	0	0	0	0	0	0	0	0	0	0	0	0	0	0	0	0	0	0
DTXSID0023454	0	0	0	0	0	0	0	0	0	0	0	0	0	0	0	0	0	0	0	0	0	0	0	0	0	0	0	0	0	0	0	0	0	0	0	0	0	0	0	0	0	0	0	0	0	0	0	0	0
DTXSID0023458	0	0	0	0	0	0	0	0	0	0	0	0	0	0	0	0	0	0	0	0	0	0	0	0	0	0	0	0	0	0	0	0	0	0	0	0	0	0	0	0	0	0	0	0	0	0	0	0	0
DTXSID4023460	0	0	0	0	0	0	0	0	0	0	0	0	0	0	0	0	0	0	0	0	0	0	0	0	0	0	0	0	0	0	0	0	0	0	0	1	1	0	0	0	0	0	0	0	0	0	0	0	0
DTXSID4023462	0	0	0	0	0	0	0	0	0	0	0	0	0	0	0	0	0	0	0	0	0	0	0	0	0	0	0	0	0	0	0	0	0	0	0	0	0	0	0	0	0	0	0	0	0	0	0	0	0
DTXSID8023470	0	0	0	0	0	0	0	0	0	0	0	0	0	0	0	0	0	0	0	0	0	0	0	0	0	0	0	0	0	0	0	0	0	0	1	0	1	0	0	0	0	0	1	1	0	0	0	0	0
DTXSID3023471	0	0	0	0	0	0	0	0	0	0	0	0	0	0	0	0	0	0	0	0	0	0	0	0	0	0	0	0	0	0	0	0	1	0	0	0	1	0	0	0	0	0	0	0	0	0	0	0	0
DTXSID8023474	0	0	0	0	0	0	0	0	0	0	0	0	0	0	0	0	0	0	0	0	0	0	0	0	0	0	0	0	0	0	0	0	0	0	0	0	1	0	0	0	0	0	0	0	0	0	0	0	0
DTXSID8023476	0	0	0	0	0	0	0	0	0	0	0	0	0	0	0	0	0	0	0	0	0	0	0	0	0	0	0	0	0	0	0	0	0	0	0	0	0	0	0	0	0	0	0	0	0	0	0	0	0
DTXSID3023479	0	0	0	0	0	0	0	0	0	0	0	0	0	0	0	0	0	0	0	0	0	0	0	0	0	0	0	0	0	0	0	0	0	0	0	0	0	0	0	0	1	0	0	1	0	0	0	0	0
DTXSID7023481	0	0	0	0	0	0	0	0	0	0	0	0	0	0	0	0	0	0	0	0	0	0	0	0	0	0	0	0	0	0	0	0	0	0	0	0	0	0	0	0	0	0	0	0	0	0	0	0	0
DTXSID7023487	0	0	0	0	0	0	0	0	0	0	0	0	0	0	0	0	0	0	0	0	0	0	0	0	0	0	0	0	0	0	0	0	0	0	1	1	1	0	0	0	0	0	0	0	0	0	0	0	0
DTXSID2023488	0	0	0	0	0	0	0	0	0	0	0	0	0	0	0	0	0	0	0	0	0	0	0	0	0	0	0	0	0	0	0	0	0	0	0	0	0	0	0	0	0	0	1	1	0	0	0	0	0
DTXSID6023490	0	0	0	0	0	0	0	0	0	0	0	0	0	0	0	0	0	0	0	0	0	0	0	0	0	0	0	0	0	0	0	0	0	0	0	0	0	0	0	0	0	0	0	0	0	0	0	0	0
DTXSID7023510	0	0	0	0	0	0	0	0	0	0	0	0	0	0	0	0	0	0	0	0	0	0	0	0	0	0	0	0	0	0	0	0	0	0	1	0	1	0	0	0	0	0	0	0	0	0	0	0	0
DTXSID7023512	0	0	0	0	0	0	0	0	0	0	0	0	0	0	0	0	0	0	0	0	0	0	0	0	0	0	0	0	0	0	0	0	0	0	1	0	1	0	0	0	0	0	0	0	0	0	0	0	0
DTXSID7023514	0	0	0	0	0	0	0	0	0	0	0	0	0	0	0	0	0	0	0	0	0	0	0	0	0	0	0	0	0	0	0	0	0	0	0	0	0	0	0	0	0	0	0	0	0	0	0	0	0
DTXSID7023514	0	0	0	0	0	0	0	0	0	0	0	0	0	0	0	0	0	0	0	0	0	0	0	0	0	0	0	0	0	0	0	0	0	0	0	0	0	0	0	0	0	0	0	0	0	0	0	0	0
DTXSID2023515	0	0	0	0	0	0	0	0	0	0	0	0	0	0	0	0	0	0	0	0	0	0	0	0	0	0	0	0	0	0	0	0	0	0	0	0	0	0	0	0	0	0	0	0	0	0	0	0	0
DTXSID7023516	0	0	0	0	0	0	0	0	0	0	0	0	0	0	0	0	0	0	0	0	0	0	0	0	0	0	0	0	0	0	0	0	0	0	1	1	1	0	0	0	0	1	0	1	0	0	0	0	0
DTXSID7023518	0	0	0	0	0	0	0	0	0	0	0	0	0	0	0	0	0	0	0	0	0	0	0	0	0	0	0	0	0	0	0	0	0	0	0	0	0	0	0	0	0	0	0	0	0	0	0	0	0
DTXSID6023525	0	0	0	0	0	0	0	0	0	0	0	0	0	0	0	0	0	0	0	0	0	0	0	0	0	0	0	0	0	0	0	0	0	0	0	0	0	0	0	0	0	0	0	0	0	0	0	0	0
DTXSID5023536	0	0	0	0	0	0	0	0	0	0	0	0	0	0	0	0	0	0	0	0	0	0	0	0	0	0	0	0	0	0	0	0	0	0	0	1	1	0	0	0	0	0	0	0	0	0	0	0	0
DTXSID5023538	0	0	0	0	0	0	0	0	0	0	0	0	0	0	0	0	0	0	0	0	0	0	0	0	0	0	0	0	0	0	0	0	0	0	0	0	0	0	0	0	0	0	0	0	0	0	0	0	0
DTXSID4023541	0	0	0	0	0	0	0	0	0	0	0	0	0	0	0	0	0	0	0	0	0	0	0	0	0	0	0	0	0	0	0	0	0	0	0	0	0	0	0	0	0	0	0	0	0	0	0	0	0
DTXSID9023548	0	0	0	0	0	0	0	0	0	0	0	0	0	0	0	0	0	0	0	0	0	0	0	0	0	0	0	0	0	0	0	0	0	0	1	0	1	0	0	0	0	0	0	0	0	0	0	0	0
DTXSID4023549	0	0	0	0	0	0	0	0	0	0	0	0	0	0	0	0	0	0	0	0	0	0	0	0	0	0	0	0	0	0	0	0	0	0	0	0	0	0	0	0	0	0	0	0	0	0	0	0	0
DTXSID3023550	0	0	0	0	0	0	0	0	0	0	0	0	0	0	0	0	0	0	0	0	0	0	0	0	0	0	0	0	0	0	0	0	0	0	0	0	0	0	0	0	0	0	0	0	0	0	0	0	0
DTXSID3023552	0	0	0	0	0	0	0	0	0	0	0	0	0	0	0	0	0	0	0	0	0	0	0	0	0	0	0	0	0	0	0	0	0	0	1	0	1	0	0	0	0	0	1	1	0	0	0	0	0
DTXSID3023554	0	0	0	0	0	0	0	0	0	0	0	0	0	0	0	0	0	0	0	0	0	0	0	0	0	0	0	0	0	0	0	0	0	0	0	0	0	0	0	0	0	0	0	0	0	0	0	1	1
DTXSID8023557	0	0	0	0	0	0	0	0	0	0	0	0	0	0	0	0	0	0	0	0	0	0	0	0	0	0	0	0	0	0	0	0	0	1	0	0	1	0	0	0	0	0	0	0	0	0	0	0	0
DTXSID7023568	0	0	0	0	0	0	0	0	0	0	0	0	0	0	0	0	0	0	0	0	0	0	0	0	0	0	0	0	0	0	0	0	0	0	1	0	1	0	0	0	0	0	0	0	0	0	0	0	0
DTXSID6023575	0	0	0	0	0	0	0	0	0	0	0	0	0	0	0	0	0	0	0	0	0	0	0	0	0	0	0	0	0	0	0	0	0	0	0	0	0	0	0	0	0	0	0	0	0	0	0	0	0
DTXSID0023581	0	0	0	0	0	0	0	0	0	0	0	0	0	0	0	0	0	0	0	0	0	0	0	0	0	0	0	0	0	0	0	0	0	0	0	0	0	0	0	0	0	0	0	0	0	0	1	0	1
DTXSID4023591	0	0	0	0	0	0	0	0	0	0	0	0	0	0	0	0	0	0	0	0	0	0	0	0	0	0	0	0	0	0	0	0	0	0	0	0	0	0	0	0	0	0	0	0	0	0	0	0	0
DTXSID9023592	0	0	0	0	0	0	0	0	0	0	0	0	0	0	0	0	0	0	0	0	0	0	0	0	0	0	0	0	0	0	0	0	0	0	0	0	0	0	0	0	0	0	0	0	0	0	0	0	0
DTXSID1023607	0	0	0	0	0	0	0	0	0	0	0	0	0	0	0	0	0	0	0	0	0	0	0	0	0	0	0	0	0	0	0	0	0	0	0	0	0	0	0	0	0	0	0	0	0	0	0	0	0
DTXSID0023612	0	0	0	0	0	0	0	0	0	0	0	0	0	0	0	0	0	0	0	0	0	0	0	0	0	0	0	0	0	0	0	0	0	0	0	0	0	0	0	0	0	0	0	0	0	0	0	0	0
DTXSID5023615	0	0	0	0	0	0	0	0	0	0	0	0	0	0	0	0	0	0	0	0	0	0	0	0	0	0	0	0	0	0	0	0	0	0	0	0	0	0	0	0	0	0	0	0	0	0	0	0	0
DTXSID0023618	0	0	0	0	0	0	0	0	0	0	0	0	0	0	0	0	0	0	0	0	0	0	0	0	0	0	0	0	0	0	0	0	0	0	0	0	1	0	0	0	0	0	0	0	0	0	0	0	0
DTXSID9023629	0	0	0	0	0	0	0	0	0	0	0	0	0	0	0	0	0	0	0	0	0	0	0	0	0	0	0	0	0	0	0	0	0	0	0	0	0	0	0	0	0	0	0	0	0	0	0	0	1
DTXSID3023639	0	0	0	0	0	0	0	0	0	0	0	0	0	0	0	0	0	0	0	0	0	0	0	0	0	0	0	0	0	0	0	0	0	0	0	1	1	0	0	0	0	0	0	0	0	0	0	0	0
DTXSID2023642	0	0	0	0	0	0	0	0	0	0	0	0	0	0	0	0	0	0	0	0	0	0	0	0	0	0	0	0	0	0	0	0	0	0	0	0	0	0	0	0	0	0	0	0	0	0	0	0	0
DTXSID7023645	0	0	0	0	0	0	0	0	0	0	0	0	0	0	0	0	0	0	0	0	0	0	0	0	0	0	0	0	0	0	0	0	0	1	0	0	1	0	0	0	0	0	0	0	0	0	0	0	0
DTXSID1023655	0	0	0	0	0	0	0	0	0	0	0	0	0	0	0	0	0	0	0	0	0	0	0	0	0	0	0	0	0	0	0	0	0	0	0	0	0	0	0	0	0	0	0	0	0	0	0	0	0
DTXSID6023656	0	0	0	0	0	0	0	0	0	0	0	0	0	0	0	0	0	0	0	0	0	0	0	0	0	0	0	0	0	0	0	0	0	0	0	0	0	0	0	0	0	0	0	0	0	0	0	0	0
DTXSID6023656	0	0	0	0	0	0	0	0	0	0	0	0	0	0	0	0	0	0	0	0	0	0	0	0	0	0	0	0	0	0	0	0	0	0	0	0	0	0	0	0	0	0	0	0	0	0	0	0	0
DTXSID0023660	0	0	0	0	0	0	0	0	0	0	0	0	0	0	0	0	0	0	0	0	0	0	0	0	0	0	0	0	0	0	0	0	0	0	0	0	0	0	0	0	0	0	0	0	0	0	0	0	0
DTXSID0023668	0	0	0	0	0	0	0	0	0	0	0	0	0	0	0	0	0	0	0	0	0	0	0	0	0	0	0	0	0	0	0	0	0	0	1	1	1	0	0	0	0	1	0	1	0	0	0	0	0
DTXSID4023676	0	0	0	0	0	0	0	0	0	0	0	0	0	0	0	0	0	0	0	0	0	0	0	0	0	0	0	0	0	0	0	0	0	0	0	0	0	0	0	0	0	0	0	0	0	0	0	0	0
DTXSID3023683	0	0	0	0	0	0	0	0	0	0	0	0	0	0	0	0	0	0	0	0	0	0	0	0	0	0	0	0	0	0	0	0	0	0	0	0	0	0	0	0	0	0	0	0	0	0	0	0	0
DTXSID2023690	0	0	0	0	0	0	0	0	0	0	0	0	0	0	0	0	0	0	0	0	0	0	0	0	0	0	0	0	0	0	0	0	0	0	0	0	1	0	0	0	0	0	0	0	0	0	0	0	0
DTXSID2023694	0	0	0	0	0	0	0	0	0	0	0	0	0	0	0	0	0	0	0	0	0	0	0	0	0	0	0	0	0	0	0	0	0	0	0	0	0	0	0	0	0	0	0	0	0	0	0	0	0
DTXSID7023699	0	0	0	0	0	0	0	0	0	0	0	0	0	0	0	0	0	0	0	0	0	0	0	0	0	0	0	0	0	0	0	0	0	0	0	0	0	0	0	0	0	0	0	0	0	0	0	0	0
DTXSID9023704	0	0	0	0	0	0	0	0	0	0	0	0	0	0	0	0	0	0	0	0	0	0	0	0	0	0	0	0	0	0	0	0	0	0	0	0	0	0	0	0	0	0	0	0	0	0	0	0	0
DTXSID4023705	0	0	0	0	0	0	0	0	0	0	0	0	0	0	0	0	0	0	0	0	0	0	0	0	0	0	0	0	0	0	0	0	0	0	0	0	0	0	0	0	0	0	0	0	0	0	0	0	0
DTXSID8023715	0	0	0	0	0	0	0	0	0	0	0	0	0	0	0	0	0	0	0	0	0	0	0	0	0	0	0	0	0	0	0	0	0	0	0	0	0	0	0	0	0	0	0	0	0	0	0	0	0
DTXSID3023716	0	0	0	0	0	0	0	0	0	0	0	0	0	0	0	0	0	0	0	0	0	0	0	0	0	0	0	0	0	0	0	0	0	0	0	0	0	0	0	0	0	0	0	0	0	0	0	1	0
DTXSID3023718	0	0	0	0	0	0	0	0	0	0	0	0	0	0	0	0	0	0	0	0	0	0	0	0	0	0	0	0	0	0	0	0	0	0	0	0	0	0	0	0	0	0	0	0	0	0	0	0	0
DTXSID8023719	0	0	0	0	0	0	0	0	0	0	0	0	0	0	0	0	0	0	0	0	0	0	0	0	0	0	0	0	0	0	0	1	0	0	1	0	1	0	0	0	0	0	0	0	0	0	0	0	0
DTXSID6023733	0	0	0	0	0	0	0	0	0	0	0	0	0	0	0	0	0	0	0	0	0	0	0	0	0	0	0	0	0	0	0	0	0	0	0	0	0	0	0	0	0	1	0	1	0	0	0	0	0
DTXSID6023733	0	0	0	0	0	0	0	0	0	0	0	0	0	0	0	0	0	0	0	0	0	0	0	0	0	0	0	0	0	0	0	0	0	0	0	0	0	0	0	0	0	1	0	1	0	0	0	0	0
DTXSID6023733	0	0	0	0	0	0	0	0	0	0	0	0	0	0	0	0	0	0	0	0	0	0	0	0	0	0	0	0	0	0	0	0	0	0	0	0	0	0	0	0	0	1	0	1	0	0	0	0	0
DTXSID6023733	0	0	0	0	0	0	0	0	0	0	0	0	0	0	0	0	0	0	0	0	0	0	0	0	0	0	0	0	0	0	0	0	0	0	0	0	0	0	0	0	0	1	0	1	0	0	0	0	0
DTXSID0023741	0	0	0	0	0	0	0	0	0	0	0	0	0	0	0	0	0	0	0	0	0	0	0	0	0	0	0	0	0	0	0	0	0	0	1	0	1	0	0	0	0	0	0	0	0	0	0	0	0
DTXSID9023754	0	0	0	0	0	0	0	0	0	0	0	0	0	0	0	0	0	0	0	0	0	0	0	0	0	0	0	0	0	0	0	0	0	0	0	0	0	0	0	0	0	1	0	1	0	0	0	0	0
DTXSID8024733	0	0	0	0	0	0	0	0	0	0	0	0	0	0	0	0	0	0	0	0	0	0	0	0	0	0	0	0	0	0	0	0	1	0	0	0	1	0	0	0	0	0	0	0	0	0	0	0	0
DTXSID6024882	0	0	0	0	0	0	0	0	0	0	0	0	0	0	0	0	0	0	0	0	0	0	0	0	0	0	0	0	0	0	0	0	0	0	1	0	1	0	0	0	0	0	0	0	0	0	0	0	0
DTXSID3025257	0	0	0	0	0	0	0	0	0	0	0	0	0	0	0	0	0	0	0	0	0	0	0	0	0	0	0	0	0	0	0	0	0	0	0	0	0	0	0	0	0	1	0	1	0	0	0	0	0
DTXSID9025409	0	0	0	0	0	0	0	0	0	0	0	0	0	0	0	0	0	0	0	0	0	0	0	0	0	0	0	0	0	0	0	0	0	0	0	0	0	0	0	0	0	0	0	0	0	0	0	0	0
DTXSID2025715	0	0	0	0	0	0	0	0	0	0	0	0	0	0	0	0	0	0	0	0	0	0	0	0	0	0	0	0	0	0	0	0	0	0	0	0	0	0	0	0	0	0	0	0	0	0	0	1	0
DTXSID0025818	0	0	0	0	0	0	0	0	0	0	0	0	0	0	0	0	0	0	0	0	0	0	0	0	0	0	0	0	0	0	0	0	0	0	0	1	1	0	0	0	0	0	0	0	0	0	0	0	0
DTXSID8026060	0	0	0	0	0	0	0	0	0	0	0	0	0	0	0	0	0	0	0	0	0	0	0	0	0	0	0	0	0	0	0	0	0	0	0	0	1	0	0	0	0	0	0	0	0	0	0	0	0
DTXSID8026064	0	0	0	0	0	0	0	0	0	0	0	0	0	0	0	0	0	0	0	0	0	0	0	0	0	0	0	0	0	0	0	0	0	0	0	0	0	0	0	0	0	0	0	0	0	0	0	0	0
DTXSID3026067	0	0	0	0	0	0	0	0	0	0	0	0	0	0	0	0	0	0	0	0	0	0	0	0	0	0	0	0	0	0	0	0	0	0	0	0	0	0	0	0	0	0	0	0	0	0	0	0	0
DTXSID8026068	0	0	0	0	0	0	0	0	0	0	0	0	0	0	0	0	0	0	0	0	0	0	0	0	0	0	0	0	0	0	0	0	0	0	0	0	0	0	0	0	0	0	0	0	0	0	0	0	0
DTXSID3029869	0	0	0	0	0	0	0	0	0	0	0	0	0	0	0	0	0	0	0	0	0	0	0	0	0	0	0	0	0	0	0	0	0	0	1	0	1	0	0	0	0	1	0	1	0	0	0	0	0
DTXSID7029871	0	0	0	0	0	0	0	0	0	0	0	0	0	0	0	0	0	0	0	0	0	0	0	0	0	0	0	0	0	0	0	0	0	0	0	0	0	0	0	0	0	0	0	0	0	0	0	0	0
DTXSID2029872	0	0	0	0	0	0	0	0	0	0	0	0	0	0	0	0	0	0	0	0	0	0	0	0	0	0	0	0	0	0	0	0	0	0	0	0	0	0	0	0	0	0	0	0	0	0	0	0	0
DTXSID7029879	0	0	0	0	0	0	0	0	0	0	0	0	0	0	0	0	0	0	0	0	0	0	0	0	0	0	0	0	0	0	0	0	0	0	0	1	1	0	0	0	0	0	0	0	0	0	0	0	0
DTXSID0032029	0	0	0	0	0	0	0	0	0	0	0	0	0	0	0	0	0	0	0	0	0	0	0	0	0	0	0	0	0	0	0	0	0	0	0	0	0	0	0	0	0	0	0	0	0	0	0	0	1
DTXSID2033314	0	0	0	0	0	0	0	0	0	0	0	0	0	0	0	0	0	0	0	0	0	0	0	0	0	0	0	0	0	0	0	0	0	0	0	0	0	0	0	0	0	0	0	0	0	0	0	0	0
DTXSID4034150	0	0	0	0	0	0	0	0	0	0	0	0	0	0	0	0	0	0	0	0	0	0	0	0	0	0	0	0	0	0	0	0	0	0	0	0	0	0	0	0	0	0	0	0	0	0	0	0	0
DTXSID4034150	0	0	0	0	0	0	0	0	0	0	0	0	0	0	0	0	0	0	0	0	0	0	0	0	0	0	0	0	0	0	0	0	0	0	0	0	0	0	0	0	0	0	0	0	0	0	0	0	0
DTXSID1034260	0	0	0	0	0	0	0	0	0	0	0	0	0	0	0	0	0	0	0	0	0	0	0	0	0	0	0	0	0	0	0	0	0	1	0	0	1	0	0	0	0	0	0	0	0	0	0	0	0
DTXSID8034376	0	0	0	0	0	0	0	0	0	0	0	0	0	0	0	0	0	0	0	0	0	0	0	0	0	0	0	0	0	0	0	0	0	0	1	0	1	0	0	0	0	0	1	1	0	0	0	0	0
DTXSID9035175	0	0	0	0	0	0	0	0	0	0	0	0	0	0	0	0	0	0	0	0	0	0	0	0	0	0	0	0	0	0	0	0	0	0	0	0	0	0	0	0	0	0	0	0	0	0	0	0	0
DTXSID3036496	0	0	0	0	0	0	0	0	0	0	0	0	0	0	0	0	0	0	0	0	0	0	0	0	0	0	0	0	0	0	0	0	0	0	0	0	0	0	0	0	0	0	0	0	0	0	0	0	0
DTXSID8036788	0	0	0	0	0	0	0	0	0	0	0	0	0	0	0	0	0	0	0	0	0	0	0	0	0	0	0	0	0	0	0	0	0	0	1	0	1	0	0	0	0	0	0	0	0	0	0	0	0
DTXSID3037044	0	0	0	0	0	0	0	0	0	0	0	0	0	0	0	0	0	0	0	0	0	0	0	0	0	0	0	0	0	0	0	0	0	0	1	1	1	0	0	0	0	1	0	1	0	0	0	0	0
DTXSID6037063	0	0	0	0	0	0	0	0	0	0	0	0	0	0	0	0	0	0	0	0	0	0	0	0	0	0	0	0	0	0	0	0	0	0	0	0	1	0	0	0	0	0	0	0	0	0	0	0	0
DTXSID6037063	0	0	0	0	0	0	0	0	0	0	0	0	0	0	0	0	0	0	0	0	0	0	0	0	0	0	0	0	0	0	0	0	0	0	0	0	1	0	0	0	0	0	0	0	0	0	0	0	0
DTXSID4037168	0	0	0	0	0	0	0	0	0	0	0	0	0	0	0	0	0	0	0	0	0	0	0	0	0	0	0	0	0	0	0	0	0	0	0	0	0	0	0	0	0	0	0	0	0	0	0	0	0
DTXSID1037197	0	0	0	0	0	0	0	0	0	0	0	0	0	0	0	0	0	0	0	0	0	0	0	0	0	0	0	0	0	0	0	0	0	0	0	1	1	0	0	0	0	1	0	1	0	0	0	0	0
DTXSID3037250	0	0	0	0	0	0	0	0	0	0	0	0	0	0	0	0	0	0	0	0	0	0	0	0	0	0	0	0	0	0	0	0	0	0	0	0	0	0	0	0	0	0	0	0	0	0	0	0	0
DTXSID1037272	0	0	0	0	0	0	0	0	0	0	0	0	0	0	0	0	0	0	0	0	0	0	0	0	0	0	0	0	0	0	0	0	0	0	0	0	0	0	0	0	0	0	0	0	0	0	0	0	0
DTXSID6037649	0	0	0	0	0	0	0	0	0	0	0	0	0	0	0	0	0	0	0	0	0	0	0	0	0	0	0	0	0	0	0	0	0	0	1	0	1	0	0	0	0	0	0	0	0	0	0	0	0
DTXSID0037653	0	0	0	0	0	0	0	0	0	0	0	0	0	0	0	0	0	0	0	0	0	0	0	0	0	0	0	0	0	0	0	0	0	1	0	0	1	0	0	0	0	0	0	0	0	0	0	0	0
DTXSID7037680	0	0	0	0	0	0	0	0	0	0	0	0	0	0	0	0	0	0	0	0	0	0	0	0	0	0	0	0	0	0	0	0	0	0	0	0	0	0	0	0	1	0	0	1	0	0	0	0	0
DTXSID9040134	0	0	0	0	0	0	0	0	0	0	0	0	0	0	0	0	0	0	0	0	0	0	0	0	0	0	0	0	0	0	0	0	0	0	0	0	0	0	0	0	0	0	0	0	0	0	0	0	1
DTXSID7040362	0	0	0	0	0	0	0	0	0	0	0	0	0	0	0	0	0	0	0	0	0	0	0	0	0	0	0	0	0	0	0	0	0	0	1	0	1	0	0	0	0	0	0	0	0	0	0	0	0
DTXSID2040446	0	0	0	0	0	0	0	0	0	0	0	0	0	0	0	0	0	0	0	0	0	0	0	0	0	0	0	0	0	0	0	0	0	0	0	0	0	0	0	0	0	0	0	0	0	0	0	0	0
DTXSID1040459	0	0	0	0	0	0	0	0	0	0	0	0	0	0	0	0	0	0	0	0	0	0	0	0	0	0	0	0	0	0	0	0	0	0	1	0	1	0	0	0	0	0	0	0	0	0	1	0	1
DTXSID6040537	0	0	0	0	0	0	0	0	0	0	0	0	0	0	0	0	0	0	0	0	0	0	0	0	0	0	0	0	0	0	0	0	0	0	0	1	1	0	0	0	0	1	0	1	0	0	0	0	0
DTXSID2040579	0	0	0	0	0	0	0	0	0	0	0	0	0	0	0	0	0	0	0	0	0	0	0	0	0	0	0	0	0	0	0	0	0	0	0	0	0	0	0	0	0	0	0	0	0	0	0	1	0
DTXSID1040617	0	0	0	0	0	0	0	0	0	0	0	0	0	0	0	0	0	0	0	0	0	0	0	0	0	0	0	0	0	0	0	0	0	0	0	0	0	0	0	0	0	0	0	0	0	0	0	0	0
DTXSID5040625	0	0	0	0	0	0	0	0	0	0	0	0	0	0	0	0	0	0	0	0	0	0	0	0	0	0	0	0	0	0	0	0	0	1	1	0	1	0	0	0	0	0	0	0	0	0	0	0	0
DTXSID0040672	0	0	0	0	0	0	0	0	0	0	0	0	0	0	0	0	0	0	0	0	0	0	0	0	0	0	0	0	0	0	0	0	1	0	0	0	1	0	0	0	0	0	0	0	0	0	0	0	0
DTXSID5040675	0	0	0	0	0	0	0	0	0	0	0	0	0	0	0	0	0	0	0	0	0	0	0	0	0	0	0	0	0	0	0	0	0	0	0	1	1	0	0	0	0	0	0	0	0	0	0	0	0
DTXSID4040680	0	0	0	0	0	0	0	0	0	0	0	0	0	0	0	0	0	0	0	0	0	0	0	0	0	0	0	0	0	0	0	0	0	0	0	0	0	0	0	0	1	0	0	1	0	0	0	0	0
DTXSID9040685	0	0	0	0	0	0	0	0	0	0	0	0	0	0	0	0	0	0	0	0	0	0	0	0	0	0	0	0	0	0	0	0	0	0	0	0	0	0	0	0	0	0	0	0	0	0	0	0	0
DTXSID4040686	0	0	0	0	0	0	0	0	0	0	0	0	0	0	0	0	0	0	0	0	0	0	0	0	0	0	0	0	0	0	0	0	0	0	0	0	0	0	0	0	0	1	0	1	0	0	0	0	0
DTXSID4040686	0	0	0	0	0	0	0	0	0	0	0	0	0	0	0	0	0	0	0	0	0	0	0	0	0	0	0	0	0	0	0	0	0	0	0	0	0	0	0	0	0	1	0	1	0	0	0	0	0
DTXSID3040691	0	0	0	0	0	0	0	0	0	0	0	0	0	0	0	0	0	0	0	0	0	0	0	0	0	0	0	0	0	0	0	0	0	0	0	0	0	0	0	0	0	0	0	0	0	0	0	0	0
DTXSID5040750	0	0	0	0	0	0	0	0	0	0	0	0	0	0	0	1	0	0	0	0	0	0	0	0	0	0	0	0	0	0	0	0	0	0	0	0	0	0	0	0	0	0	0	0	0	0	0	0	0
DTXSID9040766	0	0	0	0	0	0	0	0	0	0	0	0	0	0	0	0	0	0	0	0	0	0	0	0	0	0	0	0	0	0	0	0	0	0	1	0	1	0	0	0	0	0	0	0	0	0	0	0	0
DTXSID5040966	0	0	0	0	0	0	0	0	0	0	0	0	0	0	0	0	0	0	0	0	0	0	0	0	0	0	0	0	0	0	0	0	0	0	0	0	0	0	0	0	0	0	0	0	0	0	1	0	1
DTXSID8041032	0	0	0	0	0	0	0	0	0	0	0	0	0	0	0	0	0	0	0	0	0	0	0	0	0	0	0	0	0	0	0	0	0	0	1	0	1	0	0	0	0	0	0	0	0	0	0	0	0
DTXSID4041070	0	0	0	0	0	0	0	0	0	0	0	0	0	0	0	0	0	0	0	0	0	0	0	0	0	0	0	0	0	0	0	0	0	0	0	0	0	0	0	0	0	1	0	1	0	0	0	0	0
DTXSID3041085	0	0	0	0	0	0	0	0	0	0	0	0	0	0	0	0	0	0	0	0	0	0	0	0	0	0	0	0	0	0	0	0	0	0	0	0	0	0	0	0	1	0	0	1	0	0	0	0	0
DTXSID2041094	0	0	0	0	0	0	0	0	0	0	0	0	0	0	0	0	0	0	0	0	0	0	0	0	0	0	0	0	0	0	0	0	0	0	0	0	0	0	0	0	0	0	0	0	0	0	0	0	0
DTXSID8041117	0	0	0	0	0	0	0	0	0	0	0	0	0	0	0	0	0	0	0	0	0	0	0	0	0	0	0	0	0	0	0	0	0	0	0	0	0	0	0	0	0	0	0	0	0	0	0	0	1
DTXSID9041152	0	0	0	0	0	0	0	0	0	0	0	0	1	0	1	0	0	0	0	0	0	0	0	0	0	0	0	0	0	0	0	0	0	0	0	0	0	0	0	0	0	0	0	0	0	0	0	0	0
DTXSID4041153	0	0	0	0	0	0	0	0	0	0	0	0	0	0	0	0	0	0	0	0	0	0	0	0	0	0	0	0	0	0	0	0	0	0	0	0	0	0	0	0	0	1	0	1	0	0	0	0	0
DTXSID4041997	0	0	0	0	0	0	0	0	0	0	0	0	0	0	0	0	0	0	0	0	0	0	0	0	0	0	0	0	0	0	0	0	0	0	0	0	1	0	0	0	0	0	0	0	0	0	0	0	0
DTXSID3042477	0	0	0	0	0	0	0	0	0	0	0	0	0	0	0	0	0	0	0	0	0	0	0	0	0	0	0	0	0	0	0	0	0	0	0	0	0	0	0	0	0	0	0	0	0	0	0	0	0
DTXSID5042584	0	0	0	0	0	0	0	0	0	0	0	0	0	0	0	0	0	0	0	0	0	0	0	0	0	0	0	0	0	0	0	0	1	0	0	0	1	0	0	0	0	0	0	0	0	0	0	0	0
DTXSID0042664	0	0	0	0	0	0	0	0	0	0	0	0	0	0	0	0	0	0	0	0	0	0	0	0	0	0	0	0	0	0	0	0	0	1	1	0	1	0	0	0	0	1	0	1	0	0	0	0	0
DTXSID3042687	0	0	0	0	0	0	0	0	0	0	0	0	0	0	0	0	0	0	0	0	0	0	0	0	0	0	0	0	0	0	0	0	0	0	0	0	0	0	0	0	0	0	0	0	0	0	0	0	0
DTXSID7042691	0	0	0	0	0	0	0	0	0	0	0	0	0	0	0	0	0	0	0	0	0	0	0	0	0	0	0	0	0	0	0	0	1	0	1	0	1	0	0	0	0	0	0	0	0	0	0	0	0
DTXSID6045408	0	0	0	0	0	0	0	0	0	0	0	0	0	0	0	0	0	0	0	0	0	0	0	0	0	0	0	0	0	0	0	0	0	0	0	0	1	0	0	0	0	0	0	0	0	0	0	0	0
DTXSID0043765	0	0	0	0	0	0	0	0	0	0	0	0	0	0	0	0	0	0	0	0	0	0	0	0	0	0	0	0	0	0	0	0	0	0	0	0	0	0	0	0	0	0	0	0	0	0	0	1	0
DTXSID2043795	0	0	0	0	0	0	0	0	0	0	0	0	0	0	0	0	0	0	0	0	0	0	0	0	0	0	0	0	0	0	0	0	0	0	0	0	0	0	0	0	0	0	0	0	0	0	0	0	0
DTXSID1043833	0	0	0	0	0	0	0	0	0	0	0	0	0	0	0	0	0	0	0	0	0	0	0	0	0	0	0	0	0	0	0	0	0	0	0	0	0	0	0	0	0	0	0	0	0	0	0	0	0
DTXSID1043835	0	0	0	0	0	0	0	0	0	0	0	0	0	0	0	0	0	0	0	0	0	0	0	0	0	0	0	0	0	0	0	0	0	0	0	0	0	0	0	0	0	0	0	0	0	0	0	0	0
DTXSID9043853	0	0	0	0	0	0	0	0	0	0	0	0	0	0	0	0	0	0	0	0	0	0	0	0	0	0	0	0	0	0	0	0	0	0	1	0	1	0	0	0	0	0	0	0	0	0	0	0	0
DTXSID9043857	0	0	0	0	0	0	0	0	0	0	0	0	0	0	0	0	0	0	0	0	0	0	0	0	0	0	0	0	0	0	0	0	0	0	0	0	0	0	0	0	0	0	0	0	0	0	0	0	0
DTXSID7043873	0	0	0	0	0	0	0	0	0	0	0	0	0	0	0	0	0	0	0	0	0	0	0	0	0	0	0	0	0	0	0	0	0	0	0	0	0	0	0	0	0	0	0	0	0	0	0	0	0
DTXSID1043881	0	0	0	0	0	0	0	0	0	0	0	0	0	0	0	0	0	0	0	0	0	0	0	0	0	0	0	0	0	0	0	0	0	0	0	0	0	0	0	0	0	0	0	0	0	0	0	0	0
DTXSID1043883	0	0	0	0	0	0	0	0	0	0	0	0	0	0	0	0	0	0	0	0	0	0	0	0	0	0	0	0	0	0	0	0	0	0	0	0	0	0	0	0	0	0	0	0	0	0	0	0	0
DTXSID2043951	0	0	0	0	0	0	0	0	0	0	0	0	0	0	0	0	0	0	0	0	0	0	0	0	0	0	0	0	0	0	0	0	0	0	0	0	0	0	0	0	0	1	0	1	0	0	0	0	0
DTXSID2044002	0	0	0	0	0	0	0	0	0	0	0	0	0	0	0	0	0	0	0	0	0	0	0	0	0	0	0	0	0	0	0	0	0	0	0	0	0	0	0	0	0	0	0	0	0	0	0	0	0
DTXSID0044022	0	0	0	0	0	0	0	0	0	0	0	0	0	0	0	1	0	0	0	0	0	0	0	0	0	0	0	0	0	0	0	0	0	0	0	0	0	0	0	0	0	0	0	0	0	0	0	0	0
DTXSID3044124	0	0	0	0	0	0	0	0	0	0	0	0	0	0	0	0	0	0	0	0	0	0	0	0	0	0	0	0	0	0	0	0	0	0	1	0	1	0	0	0	0	0	0	0	0	0	0	0	0
DTXSID7044130	0	0	0	0	0	0	0	0	0	0	0	0	0	0	0	0	0	0	0	0	0	0	0	0	0	0	0	0	0	0	0	0	0	0	0	0	0	0	0	0	0	0	0	0	0	0	0	0	0
DTXSID2044131	0	0	0	0	0	0	0	0	0	0	0	0	0	0	0	0	0	0	0	0	0	0	0	0	0	0	0	0	0	0	0	0	0	0	0	0	0	0	0	0	0	0	0	0	0	0	0	0	0
DTXSID1044144	0	0	0	0	0	0	0	0	0	0	0	0	0	0	0	0	0	0	0	0	0	0	0	0	0	0	0	0	0	0	0	0	0	0	0	0	0	0	0	0	0	0	0	0	0	0	0	0	0
DTXSID9044328	0	0	0	0	0	0	0	0	0	0	0	0	0	0	0	0	0	0	0	0	0	0	0	0	0	0	0	0	0	0	0	0	0	0	0	0	0	0	0	0	0	0	0	0	0	0	0	0	0
DTXSID5044491	0	0	0	0	0	0	0	0	0	0	0	0	0	0	0	0	0	0	0	0	0	0	0	0	0	0	0	0	0	0	0	0	0	1	0	1	1	0	0	0	0	0	0	0	0	0	0	0	0
DTXSID7044554	0	1	0	0	0	0	0	0	0	0	0	0	0	0	0	0	0	0	0	0	0	0	0	0	0	0	0	0	0	0	0	0	0	0	0	0	0	0	0	0	1	0	0	1	0	0	0	0	0
DTXSID7044633	0	0	0	0	0	0	0	0	0	0	0	0	0	0	0	0	0	0	0	0	0	0	0	0	0	0	0	0	0	0	0	0	0	0	0	0	1	0	0	0	0	0	0	0	0	0	0	0	0
DTXSID5044657	0	0	0	0	0	0	0	0	0	0	0	0	0	0	0	0	0	0	0	0	0	0	0	0	0	0	0	0	0	0	0	0	0	0	0	1	1	0	0	0	0	0	0	0	0	0	0	0	0
DTXSID7045021	0	0	0	0	0	0	0	0	0	0	0	0	0	0	0	0	0	0	0	0	0	0	0	0	0	0	0	0	0	0	0	0	0	0	0	0	0	0	0	0	0	0	0	0	0	0	0	0	0
DTXSID7045029	0	0	0	0	0	0	0	0	0	0	0	0	0	0	0	0	0	0	0	0	0	0	0	0	0	0	0	0	0	0	0	0	0	0	0	0	0	0	0	0	0	0	0	0	0	0	0	0	0
DTXSID5045043	0	0	0	0	0	0	0	0	0	0	0	0	0	0	0	0	0	0	0	0	0	0	0	0	0	0	0	0	0	0	0	0	0	0	0	0	1	0	0	0	0	0	0	0	0	0	0	0	0
DTXSID0045048	0	0	0	0	0	0	0	0	0	0	0	0	0	0	0	0	0	0	0	0	0	0	0	0	0	0	0	0	0	0	0	0	0	0	0	0	1	0	0	0	0	0	0	0	0	0	0	0	0
DTXSID6045082	0	0	0	0	0	0	0	0	0	0	0	0	0	0	0	0	0	0	0	0	0	0	0	0	0	0	0	0	0	0	0	0	0	0	0	0	0	0	0	0	0	0	0	0	0	0	0	0	0
DTXSID0045090	0	0	0	0	0	0	0	0	0	0	0	0	0	0	0	0	0	0	0	0	0	0	0	0	0	0	0	0	0	0	0	0	0	0	0	0	0	0	0	0	0	0	0	0	0	0	0	0	0
DTXSID1045118	0	0	0	0	0	0	0	0	0	0	0	0	0	0	0	0	0	0	0	0	0	0	0	0	0	0	0	0	0	0	0	0	0	0	0	0	0	0	0	0	0	1	0	1	0	0	0	0	0
DTXSID0045127	0	0	0	0	0	0	0	0	0	0	0	0	0	0	0	0	0	0	0	0	0	0	0	0	0	0	0	0	0	0	0	0	0	0	0	0	0	0	0	0	0	0	0	0	0	0	0	0	0
DTXSID7045150	0	0	0	0	0	0	0	0	0	0	0	0	0	0	0	0	0	0	0	0	0	0	0	0	0	0	0	0	0	0	0	0	0	0	0	0	1	0	0	0	0	0	0	0	0	0	0	0	0
DTXSID7045152	0	0	0	0	0	0	0	0	0	0	0	0	0	0	0	0	0	0	0	0	0	0	0	0	0	0	0	0	0	0	0	0	0	0	1	0	1	0	0	0	0	0	0	0	0	0	0	0	0
DTXSID6045161	0	0	0	0	0	0	0	0	0	0	0	0	0	0	0	0	0	0	0	0	0	0	0	0	0	0	0	0	0	0	0	0	0	0	0	0	0	0	0	0	0	0	0	0	0	0	0	0	0
DTXSID6045165	0	0	0	0	0	0	0	0	0	0	0	0	0	0	0	0	0	0	0	0	0	0	0	0	0	0	0	0	0	0	0	0	0	0	0	1	1	0	0	0	0	0	0	0	0	0	0	0	0
DTXSID6045167	0	0	0	0	0	0	0	0	0	0	0	0	0	0	0	0	0	0	0	0	0	0	0	0	0	0	0	0	0	0	0	0	0	0	0	1	1	0	0	0	0	0	0	0	0	0	0	0	0
DTXSID6045169	0	0	0	0	0	0	0	0	0	0	0	0	0	0	0	0	0	0	0	0	0	0	0	0	0	0	0	0	0	0	0	0	0	0	1	0	1	0	0	0	0	0	0	0	0	0	0	0	0
DTXSID5045170	0	0	0	0	0	0	0	0	0	0	0	0	0	0	0	0	0	0	0	0	0	0	0	0	0	0	0	0	0	0	0	0	0	0	0	0	0	0	0	0	0	0	0	0	0	0	0	0	0
DTXSID5045174	0	0	0	0	0	0	0	0	0	0	0	0	0	0	0	0	0	0	0	0	0	0	0	0	0	0	0	0	0	0	0	0	0	0	0	0	0	0	0	0	0	0	0	0	0	0	0	0	0
DTXSID5045176	0	0	0	0	0	0	0	0	0	0	0	0	0	0	0	0	0	0	0	0	0	0	0	0	0	0	0	0	0	0	0	0	0	0	0	0	0	0	0	0	0	0	0	0	0	0	0	0	0
DTXSID9045182	0	0	0	0	0	0	0	0	0	0	0	0	0	0	0	0	0	0	0	0	0	0	0	0	0	0	0	0	0	0	0	0	0	0	0	1	1	0	0	0	0	0	0	0	0	0	0	0	0
DTXSID3045192	0	0	0	0	0	0	0	0	0	0	0	0	0	0	0	0	0	1	0	0	0	0	0	0	0	0	0	0	0	0	0	0	0	0	0	0	0	0	0	0	0	0	0	0	0	0	0	0	0
DTXSID3045194	0	0	0	0	0	0	0	0	0	0	0	0	0	0	0	0	0	0	0	0	0	0	0	0	0	0	0	0	0	0	0	0	0	0	0	0	0	0	0	0	0	0	0	0	0	0	0	0	0
DTXSID5045209	0	0	0	0	0	0	0	0	0	0	0	0	0	0	0	0	0	0	0	0	0	0	0	0	0	0	0	0	0	0	0	0	0	0	1	1	1	0	0	0	0	0	0	0	0	0	0	0	0
DTXSID8045220	0	0	0	0	0	0	0	0	0	0	0	0	0	0	0	0	0	0	0	0	0	0	0	0	0	0	0	0	0	0	0	0	0	0	0	1	1	0	0	0	0	0	0	0	0	0	0	0	0
DTXSID8045222	0	0	0	0	0	0	0	0	0	0	0	0	0	0	0	0	0	0	0	0	0	0	0	0	0	0	0	0	0	0	0	0	0	0	0	0	1	0	0	0	0	0	0	0	0	0	0	0	0
DTXSID2045236	0	0	0	0	0	0	0	0	0	0	0	0	0	0	0	0	0	0	0	0	0	0	0	0	0	0	0	0	0	0	0	0	0	1	0	0	1	0	0	0	0	0	0	0	0	0	0	0	0
DTXSID2045238	0	0	0	0	0	0	0	0	0	0	0	0	0	0	0	0	1	0	0	0	0	0	0	0	0	0	0	0	0	0	0	0	0	0	1	0	1	0	0	0	0	0	0	0	0	0	0	0	0
DTXSID6045244	0	0	0	0	0	0	0	0	0	0	0	0	0	0	0	0	0	0	0	0	0	0	0	0	0	0	0	0	0	0	0	0	0	0	0	0	1	0	0	0	0	0	0	0	0	0	0	0	0
DTXSID1045245	0	0	0	0	0	0	0	0	0	0	0	0	0	0	0	0	0	0	0	0	0	0	0	0	0	0	0	0	0	0	0	0	0	0	0	0	0	0	0	0	0	0	0	0	0	0	0	0	0
DTXSID0045250	0	0	0	0	0	0	0	0	0	0	0	0	0	0	0	0	0	0	0	0	0	0	0	0	0	0	0	0	0	0	0	0	0	0	1	0	1	0	0	0	0	0	0	0	0	0	0	0	0
DTXSID4045262	0	0	0	0	0	0	0	0	0	0	0	0	0	0	0	0	0	0	0	0	0	0	0	0	0	0	0	0	0	0	0	0	0	0	1	0	1	0	0	0	0	0	0	0	0	0	0	0	0
DTXSID2045280	0	0	0	0	0	0	0	0	0	0	0	0	0	0	0	0	0	0	0	0	0	0	0	0	0	0	0	0	0	0	0	0	0	0	0	0	0	0	0	0	0	0	0	0	0	0	0	0	0
DTXSID7045287	0	0	0	0	0	0	0	0	0	0	0	0	0	0	0	0	0	0	0	0	0	0	0	0	0	0	0	0	0	0	0	0	0	0	0	0	1	0	0	0	0	0	0	0	0	0	0	0	0
DTXSID1045291	0	0	0	0	0	0	0	0	0	0	0	0	0	0	0	0	0	0	0	0	0	0	0	0	0	0	0	0	0	0	0	0	0	0	0	0	1	0	0	0	0	0	0	0	0	0	0	0	0
DTXSID1045297	0	0	0	0	0	0	0	0	0	0	0	0	0	0	0	0	0	0	0	0	0	0	0	0	0	0	0	0	0	0	0	0	0	0	0	0	0	0	0	0	0	0	0	0	0	0	0	0	0
DTXSID3045304	0	0	0	0	0	0	0	0	0	0	0	0	0	0	0	0	0	0	0	0	0	0	0	0	0	0	0	0	0	0	0	0	0	0	0	0	0	0	0	0	0	0	0	0	0	0	0	0	0
DTXSID8045305	0	0	0	0	0	0	0	0	0	0	0	0	0	0	0	0	0	0	0	0	0	0	0	0	0	0	0	0	0	0	0	0	0	0	0	0	0	0	0	0	0	0	1	1	0	0	1	0	1
DTXSID7045310	0	0	0	0	0	0	0	0	0	0	0	0	0	0	0	0	0	0	0	0	0	0	0	0	0	0	0	0	0	0	0	0	0	0	0	0	0	0	0	0	0	0	0	0	0	0	0	0	0
DTXSID7045318	0	0	0	0	0	0	0	0	0	0	0	0	0	0	0	0	0	0	0	0	0	0	0	0	0	0	0	0	0	0	0	0	0	0	0	0	0	0	0	0	0	0	0	0	0	0	0	1	0
DTXSID5045330	0	0	0	0	0	0	0	0	0	0	0	0	0	0	0	0	0	0	0	0	0	0	0	0	0	0	0	0	0	0	0	0	0	0	1	0	1	0	0	0	0	0	0	0	0	0	0	0	0
DTXSID9045342	0	0	0	0	0	0	0	0	0	0	0	0	0	0	0	0	0	0	0	0	0	0	0	0	0	0	0	0	0	0	0	0	0	0	0	1	1	0	0	0	1	0	0	1	0	1	1	0	1
DTXSID4045343	0	0	0	0	0	0	0	0	0	0	0	0	0	0	0	0	0	0	0	0	0	0	0	0	0	0	0	0	0	0	0	0	0	0	0	0	1	0	0	0	0	0	0	0	0	0	0	0	0
DTXSID9045344	0	0	0	0	0	0	0	0	0	0	0	0	0	0	0	0	0	0	0	0	0	0	0	0	0	0	0	0	0	0	0	0	0	0	1	0	1	0	0	0	0	1	0	1	0	0	0	0	0
DTXSID3045350	0	0	0	0	0	0	0	0	0	0	0	0	0	0	0	0	0	0	0	0	0	0	0	0	0	0	0	0	0	0	0	0	0	0	0	0	0	0	0	0	0	1	0	1	0	0	0	0	0
DTXSID8045351	0	0	0	0	0	0	0	0	0	0	0	0	0	0	0	0	0	0	0	0	0	0	0	0	0	0	0	0	0	0	0	0	0	0	0	0	0	0	0	0	0	0	0	0	0	0	0	0	0
DTXSID2045361	0	0	0	0	0	0	0	0	0	0	0	0	0	0	0	0	0	0	0	0	0	0	0	0	0	0	0	0	0	0	0	0	0	0	0	0	0	0	0	0	0	0	0	0	0	0	0	0	0
DTXSID7045366	0	0	0	0	0	0	0	0	0	0	0	0	0	0	0	0	0	0	0	0	0	0	0	0	0	0	0	0	0	0	0	0	0	0	1	0	1	0	0	0	0	0	0	0	0	0	0	0	0
DTXSID2045367	0	0	0	0	0	0	0	0	0	0	0	0	0	0	0	0	0	0	0	0	0	0	0	0	0	0	0	0	0	0	0	0	0	0	0	0	0	0	0	0	0	0	0	0	0	0	0	0	0
DTXSID7045368	0	0	0	0	0	0	0	0	0	0	0	0	0	0	0	0	0	0	0	0	0	0	0	0	0	0	0	0	0	0	0	0	0	0	0	0	1	0	0	0	0	0	0	0	0	0	0	0	0
DTXSID6045371	0	0	0	0	0	0	0	0	0	0	0	0	0	0	0	0	0	0	0	0	0	0	0	0	0	0	0	0	0	0	0	0	0	0	0	0	0	0	0	0	0	0	0	0	0	0	0	0	0
DTXSID6045375	0	0	0	0	0	0	0	0	0	0	0	0	0	0	0	1	1	0	0	0	0	0	0	0	0	0	0	0	0	0	0	0	0	0	0	0	0	0	0	0	0	0	0	0	0	0	0	0	0
DTXSID6045379	0	0	0	0	0	0	0	0	0	0	0	0	0	0	0	0	0	0	0	0	0	0	0	0	0	0	0	0	0	0	0	0	0	0	0	0	0	0	0	0	0	0	0	0	0	0	0	0	1
DTXSID0045383	0	0	0	0	0	0	0	0	0	0	0	0	0	0	0	0	0	0	0	0	0	0	0	0	0	0	0	0	0	0	0	0	0	0	1	0	1	0	0	0	0	0	0	0	0	0	0	0	0
DTXSID0045389	0	0	0	0	0	0	0	0	0	0	0	0	0	0	0	0	0	0	0	0	0	0	0	0	0	0	0	0	0	0	0	0	0	0	0	0	0	0	0	0	0	1	0	1	0	0	0	0	0
DTXSID6045400	0	0	0	0	0	0	0	0	0	0	0	0	0	0	0	0	0	0	0	0	0	0	0	0	0	0	0	0	0	0	0	0	1	0	0	0	1	0	0	0	0	0	0	0	0	0	0	0	0
DTXSID1045409	0	0	0	0	0	0	0	0	0	0	0	0	0	0	0	0	0	0	0	0	0	0	0	0	0	0	0	0	0	0	0	0	0	0	0	0	0	0	0	0	0	0	1	1	0	0	0	0	0
DTXSID4045422	0	0	0	0	0	0	0	0	0	0	0	0	0	0	0	0	0	0	0	0	0	0	0	0	0	0	0	0	0	0	0	0	0	0	0	0	0	0	0	0	0	0	0	0	0	0	0	0	0
DTXSID4045424	0	0	0	0	0	0	0	0	0	0	0	0	0	0	0	0	0	0	0	0	0	0	0	0	0	0	0	0	0	0	0	0	0	0	0	0	0	0	0	0	1	0	0	1	0	0	0	0	0
DTXSID9045425	0	0	0	0	0	0	0	0	0	0	0	0	0	0	0	0	0	0	0	0	0	0	0	0	0	0	0	0	0	0	0	0	0	0	0	0	0	0	0	0	0	0	0	0	0	0	0	0	0
DTXSID3045439	0	0	0	0	0	0	0	0	0	0	0	0	0	0	0	0	0	0	0	0	0	0	0	0	0	0	0	0	0	0	0	0	0	0	0	0	0	0	0	0	0	0	0	0	0	0	0	0	0
DTXSID7045447	0	0	0	0	0	0	0	0	0	0	0	0	0	0	0	0	0	0	0	0	0	0	0	0	0	0	0	0	0	0	0	0	0	0	0	0	0	0	0	0	0	0	0	0	0	0	0	0	0
DTXSID2045448	0	0	0	0	0	0	0	0	0	0	0	0	0	0	0	0	0	0	0	0	0	0	0	0	0	0	0	0	0	0	0	0	0	0	0	0	0	0	0	0	0	0	0	0	0	0	0	0	0
DTXSID1045459	0	0	0	0	0	0	0	0	0	0	0	0	0	0	0	0	0	0	0	0	0	0	0	0	0	0	0	0	0	0	0	0	0	0	1	1	1	0	0	0	0	0	0	0	0	1	0	0	1
DTXSID5045463	0	0	0	0	0	0	0	0	0	0	0	0	0	0	0	0	0	0	0	0	0	0	0	0	0	0	0	0	0	0	0	0	0	0	0	0	0	0	0	0	0	0	0	0	0	0	1	0	1
DTXSID5045465	0	0	0	0	0	0	0	0	0	0	0	0	0	0	0	0	0	0	0	0	0	0	0	0	0	0	0	0	0	0	0	0	0	0	0	0	0	0	0	0	0	0	0	0	0	0	0	0	0
DTXSID4045474	0	0	0	0	0	0	0	0	0	0	0	0	0	0	0	0	0	0	0	0	0	0	0	0	0	0	0	0	0	0	0	0	0	0	0	0	0	0	0	0	0	0	0	0	0	0	0	0	1
DTXSID8045488	0	0	0	0	0	0	0	0	0	0	0	0	0	0	0	0	0	0	0	0	0	0	0	0	0	0	0	0	0	0	0	0	0	0	0	0	0	0	0	0	0	0	0	0	0	0	0	0	0
DTXSID2045492	0	0	0	0	0	0	0	0	0	0	0	0	0	0	0	0	0	0	0	0	0	0	0	0	0	0	0	0	0	0	0	0	0	0	1	0	1	0	0	0	0	1	0	1	0	0	0	0	0
DTXSID2045498	0	0	0	0	0	0	0	0	0	0	0	0	0	0	0	0	0	0	0	0	0	0	0	0	0	0	0	0	0	0	0	0	0	0	0	0	0	0	0	0	0	0	0	0	0	0	0	0	0
DTXSID9045502	0	0	0	0	0	0	0	0	0	0	0	0	0	0	0	0	0	0	0	0	0	0	0	0	0	0	0	0	0	0	0	0	0	0	0	0	0	0	0	0	0	0	0	0	0	1	1	0	1
DTXSID2045521	0	0	0	0	0	0	0	0	0	0	0	0	0	0	0	0	0	0	0	0	0	0	0	0	0	0	0	0	0	0	0	0	0	0	1	1	1	0	0	0	0	0	0	0	0	0	0	0	0
DTXSID7045526	0	0	0	0	0	0	0	0	0	0	0	0	0	0	0	0	0	0	0	0	0	0	0	0	0	0	0	0	0	0	0	0	0	0	0	1	1	0	0	0	1	0	0	1	0	0	0	0	0
DTXSID6045531	0	0	0	0	0	0	0	0	0	0	0	0	0	0	0	0	0	0	0	0	0	0	0	0	0	0	0	0	0	0	0	0	0	0	0	0	0	0	0	0	0	0	0	0	0	0	0	0	0
DTXSID6045535	0	0	0	0	0	0	0	0	0	0	0	0	0	0	0	0	0	0	0	0	0	0	0	0	0	0	0	0	0	0	0	0	0	0	0	0	0	0	0	0	0	0	0	0	0	1	1	0	1
DTXSID1045536	0	0	0	0	0	0	0	0	0	0	0	0	0	0	0	0	0	0	0	0	0	0	0	0	0	0	0	0	0	0	0	0	0	1	0	0	1	0	0	0	0	0	0	0	0	0	0	0	0
DTXSID4045559	0	0	0	0	0	0	0	0	0	0	0	0	0	0	0	0	0	0	0	0	0	0	0	0	0	0	0	0	0	0	0	0	0	0	0	0	0	0	0	0	0	0	0	0	0	0	0	0	0
DTXSID2045602	0	1	0	0	0	0	0	0	0	0	0	0	0	0	0	0	0	0	0	0	0	0	0	0	0	0	0	0	0	0	0	0	0	0	0	0	0	0	0	0	0	1	0	1	0	0	0	0	0
DTXSID7045607	0	0	0	0	0	0	0	0	0	0	0	0	0	0	0	0	0	0	0	0	0	0	0	0	0	0	0	0	0	0	0	0	0	0	0	0	0	0	0	0	0	0	0	0	0	0	0	0	0
DTXSID6045616	0	0	0	0	0	0	0	0	0	0	0	0	0	0	0	0	0	0	0	0	0	0	0	0	0	0	0	0	0	0	0	0	0	0	0	0	0	0	0	0	0	0	0	0	0	0	0	0	0
DTXSID8045646	0	0	0	0	0	0	0	0	0	0	0	0	0	0	0	1	0	0	0	0	0	0	0	0	0	0	0	0	0	0	0	0	0	0	0	0	0	0	0	0	0	0	0	0	0	1	1	0	1
DTXSID2045656	0	0	0	0	0	0	0	0	0	0	0	0	0	0	0	0	0	0	0	0	0	0	0	0	0	0	0	0	0	0	0	0	0	0	0	0	0	0	0	0	0	0	0	0	0	0	0	0	0
DTXSID6045666	0	0	0	0	0	0	0	0	0	0	0	0	0	0	0	0	0	0	0	0	0	0	0	0	0	0	0	0	0	0	0	0	0	0	0	0	0	0	0	0	0	0	0	0	0	0	0	0	0
DTXSID3045809	0	0	0	0	0	0	0	0	0	0	0	0	0	0	0	0	0	0	0	0	0	0	0	0	0	0	0	0	0	0	0	0	0	0	0	0	1	0	0	0	0	0	0	0	0	0	0	0	0
DTXSID3045809	0	0	0	0	0	0	0	0	0	0	0	0	0	0	0	0	0	0	0	0	0	0	0	0	0	0	0	0	0	0	0	0	0	0	0	0	1	0	0	0	0	0	0	0	0	0	0	0	0
DTXSID6045824	0	0	0	0	0	0	0	0	0	0	0	0	0	0	0	0	0	0	0	0	0	0	0	0	0	0	0	0	0	0	0	0	0	0	0	0	0	0	0	0	0	0	0	0	0	0	0	0	0
DTXSID5045831	0	0	0	0	0	0	0	0	0	0	0	0	0	0	0	0	0	0	0	0	0	0	0	0	0	0	0	0	0	0	0	0	0	0	0	1	1	0	0	0	0	1	0	1	0	0	0	0	0
DTXSID3045857	0	0	0	0	0	0	0	0	0	0	0	0	0	0	0	0	0	0	0	0	0	0	0	0	0	0	0	0	0	0	0	0	0	0	0	0	0	0	0	0	0	0	0	0	0	0	0	0	0
DTXSID7045944	0	0	0	0	0	0	0	0	0	0	0	0	0	0	0	0	0	0	0	0	0	0	0	0	0	0	0	0	0	0	0	0	0	0	0	0	0	0	0	0	0	0	0	0	0	0	0	1	0
DTXSID5046196	0	0	0	0	0	0	0	0	0	0	0	0	0	0	0	0	0	0	0	0	0	0	0	0	0	0	0	0	0	0	0	0	0	0	0	0	0	0	0	0	0	0	0	0	0	0	0	0	0
DTXSID4046313	0	0	0	0	0	0	0	0	0	0	0	0	0	0	0	0	0	0	0	0	0	0	0	0	0	0	0	0	0	0	0	0	0	0	0	0	0	0	0	0	0	0	0	0	0	0	0	0	0
DTXSID4046319	0	0	0	0	0	0	0	0	0	0	0	0	0	0	0	0	0	0	0	0	0	0	0	0	0	0	0	0	0	0	0	0	0	0	0	0	0	0	0	0	0	0	0	0	0	0	1	0	1
DTXSID4046602	0	0	0	0	0	0	0	0	0	0	0	0	0	0	0	0	0	0	0	0	0	0	0	0	0	0	0	0	0	0	0	0	0	0	1	0	1	0	0	0	0	0	0	0	0	0	0	0	0
DTXSID5046930	0	0	0	0	0	0	0	0	0	0	0	0	0	0	0	0	0	0	0	0	0	0	0	0	0	0	0	0	0	0	0	0	0	0	0	0	0	0	0	0	0	0	0	0	0	0	0	0	1
DTXSID0046933	0	0	0	0	0	0	0	0	0	0	0	0	0	0	0	0	0	0	0	0	0	0	0	0	0	0	0	0	0	0	0	0	0	0	0	0	0	0	0	0	0	0	0	0	0	0	0	0	0
DTXSID0046939	0	0	0	0	0	0	0	0	0	0	0	0	0	0	0	0	0	0	0	0	0	0	0	0	0	0	0	0	0	0	0	0	0	0	0	0	0	0	0	0	0	0	0	0	0	0	0	0	0
DTXSID9046940	0	0	0	0	0	0	0	0	0	0	0	0	0	0	0	0	0	0	0	0	0	0	0	0	0	0	0	0	0	0	0	0	0	0	0	0	0	0	0	0	0	0	0	0	0	1	1	0	1
DTXSID4046941	0	0	0	0	0	0	0	0	0	0	0	0	0	0	0	0	0	0	0	0	0	0	0	0	0	0	0	0	0	0	0	0	0	0	0	0	0	0	0	0	0	0	0	0	0	0	0	0	0
DTXSID4046943	0	0	0	0	0	0	0	0	0	0	0	0	0	0	0	0	0	0	0	0	0	0	0	0	0	0	0	0	0	0	0	0	0	0	0	0	0	0	0	0	0	0	0	0	0	0	0	0	0
DTXSID9046944	0	0	0	0	0	0	0	0	0	0	0	0	0	0	0	0	0	0	0	0	0	0	0	0	0	0	0	0	0	0	0	0	0	0	1	0	1	0	0	0	0	0	0	0	0	0	0	0	0
DTXSID4046945	0	0	0	0	0	0	0	0	0	0	0	0	0	0	0	0	0	0	0	0	0	0	0	0	0	0	0	0	0	0	0	0	0	0	0	0	0	0	0	0	0	0	0	0	0	0	0	0	0
DTXSID4046947	0	0	0	0	0	0	0	0	0	0	0	0	0	0	0	0	0	0	0	0	0	0	0	0	0	0	0	0	0	0	0	0	0	0	0	0	0	0	0	0	0	0	0	0	0	0	0	0	0
DTXSID3046952	0	0	0	0	0	0	0	0	0	0	0	0	0	0	0	0	0	0	0	0	0	0	0	0	0	0	0	0	0	0	0	0	0	0	0	0	0	0	0	0	0	0	0	0	0	0	0	0	0
DTXSID3046956	0	0	0	0	0	0	0	0	0	0	0	0	0	0	0	0	0	0	0	0	0	0	0	0	0	0	0	0	0	0	0	0	0	0	0	0	0	0	0	0	0	0	0	0	0	0	0	0	0
DTXSID8046957	0	0	0	0	0	0	0	0	0	0	0	0	0	0	0	0	0	0	0	0	0	0	0	0	0	0	0	0	0	0	0	0	0	0	0	0	0	0	0	0	0	0	0	0	0	0	0	0	0
DTXSID2046961	0	0	0	0	0	0	0	0	0	0	0	0	0	0	0	0	0	0	0	0	0	0	0	0	0	0	0	0	0	0	0	0	0	0	1	1	1	0	0	0	0	1	0	1	0	0	0	0	0
DTXSID7046964	0	0	0	0	0	0	0	0	0	0	0	0	0	0	0	0	0	0	0	0	0	0	0	0	0	0	0	0	0	0	0	0	0	0	0	0	0	0	0	0	0	0	0	0	0	0	0	0	1
DTXSID7047433	0	0	0	0	0	0	0	0	0	0	0	0	0	0	0	0	0	0	0	0	0	0	0	0	0	0	0	0	0	0	0	0	0	0	0	0	0	0	0	0	0	0	0	0	0	0	0	0	0
DTXSID2047436	0	0	0	0	0	0	0	0	0	0	0	0	0	0	0	0	0	0	0	0	0	0	0	0	0	0	0	0	0	0	0	0	0	0	1	0	1	0	0	0	0	1	0	1	0	0	0	0	0
DTXSID7048164	0	0	0	0	0	0	0	0	0	0	0	0	0	0	0	0	0	0	0	0	0	0	0	0	0	0	0	0	0	0	0	0	0	0	0	0	0	0	0	0	0	0	0	0	0	0	0	0	1
DTXSID6047860	0	0	0	0	0	0	0	0	0	0	0	0	0	0	0	0	0	0	0	0	0	0	0	0	0	0	0	0	0	0	0	0	0	0	0	0	0	0	0	0	0	0	0	0	0	0	0	0	0
DTXSID6047862	0	0	0	0	0	0	0	0	0	0	0	0	0	0	0	0	0	0	0	0	0	0	0	0	0	0	0	0	0	0	0	0	0	0	0	0	0	0	0	0	0	0	0	0	0	0	0	0	0
DTXSID1047863	0	0	0	0	0	0	0	0	0	0	0	0	0	0	0	0	0	0	0	0	0	0	0	0	0	0	0	0	0	0	0	0	0	0	0	0	0	0	0	0	0	0	0	0	0	0	0	0	0
DTXSID6047866	0	0	0	0	0	0	0	0	0	0	0	0	0	0	0	0	0	0	0	0	0	0	0	0	0	0	0	0	0	0	0	0	0	0	0	0	0	0	0	0	0	0	0	0	0	0	0	0	0
DTXSID3048526	0	0	0	0	0	0	0	0	0	0	0	0	0	0	0	0	0	0	0	0	0	0	0	0	0	0	0	0	0	0	0	0	0	0	0	0	0	0	0	0	0	0	0	0	0	0	0	0	0
DTXSID3048528	0	0	0	0	0	0	0	0	0	0	0	0	0	0	0	0	0	0	0	0	0	0	0	0	0	0	0	0	0	0	0	0	0	0	0	0	0	0	0	0	0	0	0	0	0	1	0	0	1
DTXSID8048529	0	0	0	0	0	0	0	0	0	0	0	0	0	0	0	0	0	0	0	0	0	0	0	0	0	0	0	0	0	0	0	0	0	0	0	0	0	0	0	0	0	0	0	0	0	0	0	0	0
DTXSID7048532	0	0	0	0	0	0	0	0	0	0	0	0	0	0	0	0	0	0	0	0	0	0	0	0	0	0	0	0	0	0	0	0	0	0	0	0	0	0	0	0	0	0	0	0	0	0	0	0	0
DTXSID2048533	0	0	0	0	0	0	0	0	0	0	0	0	0	0	0	0	0	0	0	0	0	0	0	0	0	0	0	0	0	0	0	0	0	0	0	0	0	0	0	0	0	0	0	0	0	0	0	0	0
DTXSID7048534	0	0	0	0	0	0	0	0	0	0	0	0	0	0	0	0	0	0	0	0	0	0	0	0	0	0	0	0	0	0	0	0	0	0	0	0	0	0	0	0	0	0	0	0	0	0	0	0	0
DTXSID2048535	0	0	0	0	0	0	0	0	0	0	0	0	0	0	0	0	0	0	0	0	0	0	0	0	0	0	0	0	0	0	0	0	0	0	0	0	0	0	0	0	0	0	0	0	0	0	0	0	0
DTXSID7048536	0	0	0	0	0	0	0	0	0	0	0	0	0	0	0	0	0	0	0	0	0	0	0	0	0	0	0	0	0	0	0	0	0	0	1	0	1	0	0	0	0	0	0	0	0	0	0	0	0
DTXSID2048539	0	0	0	0	0	0	0	0	0	0	0	0	0	0	0	0	0	0	0	0	0	0	0	0	0	0	0	0	0	0	0	0	0	0	1	0	1	0	0	0	0	0	0	0	0	0	0	0	0
DTXSID9048065	0	0	0	0	0	0	0	0	0	0	0	0	0	0	0	0	0	0	0	0	0	0	0	0	0	0	0	0	0	0	0	0	0	0	0	0	0	0	0	0	0	0	0	0	0	0	0	0	0
DTXSID3048073	0	0	0	0	0	0	0	0	0	0	0	0	0	0	0	0	0	0	0	0	0	0	0	0	0	0	0	0	0	0	0	0	0	0	0	0	0	0	0	0	0	0	0	0	0	0	0	0	0
DTXSID7048112	0	0	0	0	0	0	0	0	0	0	0	0	0	0	0	0	0	0	0	0	0	0	0	0	0	0	0	0	0	0	0	0	0	0	0	0	0	0	0	0	0	0	0	0	0	0	0	1	0
DTXSID1048540	0	0	0	0	0	0	0	0	0	0	0	0	0	0	0	0	0	0	0	0	0	0	0	0	0	0	0	0	0	0	0	0	0	0	1	1	1	0	0	0	0	0	0	0	0	0	0	0	1
DTXSID1048542	0	0	0	0	0	0	0	0	0	0	0	0	0	0	0	0	0	0	0	0	0	0	0	0	0	0	0	0	0	0	0	0	0	0	0	0	0	0	0	0	0	0	0	0	0	0	0	0	0
DTXSID6048543	0	0	0	0	0	0	0	0	0	0	0	0	0	0	0	0	0	0	0	0	0	0	0	0	0	0	0	0	0	0	0	0	0	0	0	0	0	0	0	0	0	0	0	0	0	0	0	0	0
DTXSID1048544	0	0	0	0	0	0	0	0	0	0	0	0	0	0	0	0	0	0	0	0	0	0	0	0	0	0	0	0	0	0	0	0	0	0	0	0	0	0	0	0	0	0	0	0	0	0	0	0	1
DTXSID1048546	0	0	0	0	0	0	0	0	0	0	0	0	0	0	0	0	0	0	0	0	0	0	0	0	0	0	0	0	0	0	0	0	0	0	0	0	0	0	0	0	0	0	0	0	0	0	0	0	0
DTXSID6048547	0	0	0	0	0	0	0	0	0	0	0	0	0	0	0	0	0	0	0	0	0	0	0	0	0	0	0	0	0	0	0	0	0	0	0	0	0	0	0	0	1	0	0	1	0	0	0	0	0
DTXSID1048548	0	0	0	0	0	0	0	0	0	0	0	0	1	0	1	0	0	0	0	0	0	0	0	0	0	0	0	0	0	0	0	0	0	0	0	0	0	0	0	0	0	1	0	1	0	0	0	0	0
DTXSID6048549	0	0	0	0	0	0	0	0	0	0	0	0	0	0	0	0	0	0	0	0	0	0	0	0	0	0	0	0	0	0	0	0	0	0	1	0	1	0	0	0	0	0	0	0	0	0	0	0	0
DTXSID5048550	0	0	0	0	0	0	0	0	0	0	0	0	0	0	0	0	0	0	0	0	0	0	0	0	0	0	0	0	0	0	0	0	1	0	0	0	1	0	0	0	0	0	0	0	0	0	0	0	0
DTXSID0048551	0	0	0	0	0	0	0	0	0	0	0	0	0	0	0	0	0	0	0	0	0	0	0	0	0	0	0	0	0	0	0	0	0	0	0	0	0	0	0	0	0	0	0	0	0	0	0	0	0
DTXSID5048552	0	0	0	0	0	0	0	0	0	0	0	0	0	0	0	0	0	0	0	0	0	0	0	0	0	0	0	0	0	0	0	0	0	0	0	0	0	0	0	0	0	0	0	0	0	0	0	0	0
DTXSID0048555	0	0	0	0	0	0	0	0	0	0	0	0	0	0	0	0	0	0	0	0	0	0	0	0	0	0	0	0	0	0	0	0	0	0	0	0	0	0	0	0	0	0	0	0	0	0	0	0	0
DTXSID9048140	0	0	0	0	0	0	0	0	0	0	0	0	0	0	0	0	0	0	0	0	0	0	0	0	0	0	0	0	0	0	0	0	0	0	0	0	0	0	0	0	0	0	0	0	0	0	0	0	0
DTXSID4048141	0	0	0	0	0	0	0	0	0	0	0	0	0	0	0	0	0	0	0	0	0	0	0	0	0	0	0	0	0	0	0	0	0	0	0	0	0	0	0	0	0	0	0	0	0	0	0	0	0
DTXSID0048557	0	0	0	0	0	0	0	0	0	0	0	0	0	0	0	0	0	0	0	0	0	0	0	0	0	0	0	0	0	0	0	0	0	0	0	0	0	0	0	0	0	0	0	0	0	0	0	0	0
DTXSID0048559	0	0	0	0	0	0	0	0	0	0	0	0	0	0	0	0	0	0	0	0	0	0	0	0	0	0	0	0	0	0	0	0	0	0	0	0	0	0	0	0	0	0	1	1	0	0	0	0	0
DTXSID9048560	0	0	0	0	0	0	0	0	0	0	0	0	0	0	0	0	0	0	0	0	0	0	0	0	0	0	0	0	0	0	0	0	0	0	0	0	0	0	0	0	0	0	0	0	0	0	0	0	0
DTXSID9048562	0	0	0	0	0	0	0	0	0	0	0	0	0	0	0	0	0	0	0	0	0	0	0	0	0	0	0	0	0	0	0	0	0	0	0	0	0	0	0	0	0	0	0	0	0	0	0	0	0
DTXSID9048564	0	0	0	0	0	0	0	0	0	0	0	0	0	0	0	0	0	0	0	0	0	0	0	0	0	0	0	0	0	0	0	0	0	0	0	0	1	0	0	0	0	0	0	0	0	0	0	0	0
DTXSID4048565	0	0	0	0	0	0	0	0	0	0	0	0	0	0	0	0	0	0	0	0	0	0	0	0	0	0	0	0	0	0	0	0	0	0	0	0	0	0	0	0	0	0	1	1	0	0	0	0	0
DTXSID9048566	0	0	0	0	0	0	0	0	0	0	0	0	0	0	0	0	0	0	0	0	0	0	0	0	0	0	0	0	0	0	0	0	0	0	0	0	0	0	0	0	0	0	0	0	0	0	1	0	1
DTXSID9048229	0	0	0	0	0	0	0	0	0	0	0	0	0	0	0	0	0	0	0	0	0	0	0	0	0	0	0	0	0	0	0	0	0	0	0	0	0	0	0	0	0	0	0	0	0	0	0	0	0
DTXSID8048230	0	0	0	0	0	0	0	0	0	0	0	0	0	0	0	0	0	0	0	0	0	0	0	0	0	0	0	0	0	0	0	0	0	0	0	0	0	0	0	0	0	0	0	0	0	0	0	0	0
DTXSID3048233	0	0	0	0	0	0	0	0	0	0	0	0	0	0	0	0	0	0	0	0	0	0	0	0	0	0	0	0	0	0	0	0	0	0	0	0	0	0	0	0	0	0	0	0	0	0	0	0	0
DTXSID7048249	0	0	0	0	0	0	0	0	1	0	0	0	1	0	0	0	0	0	0	0	0	0	0	0	0	0	0	0	0	0	0	0	0	0	0	0	0	0	0	0	0	0	0	0	0	0	0	0	0
DTXSID5048394	0	0	0	0	0	0	0	0	0	0	0	0	0	0	0	0	0	0	0	0	0	0	0	0	0	0	0	0	0	0	0	0	0	0	0	0	0	0	0	0	0	0	0	0	0	0	0	0	0
DTXSID7048405	0	0	0	0	0	0	0	0	0	0	0	0	0	0	0	0	0	0	0	0	0	0	0	0	0	0	0	0	0	0	0	0	0	0	0	0	0	0	0	0	0	0	0	0	0	0	1	0	1
DTXSID9048435	0	0	0	0	0	0	0	0	0	0	0	0	0	0	0	0	0	0	0	0	0	0	0	0	0	0	0	0	0	0	0	0	0	0	1	0	1	0	0	0	0	0	0	0	0	0	0	0	0
DTXSID9048437	0	0	0	0	0	0	0	0	0	0	0	0	0	0	0	0	0	0	0	0	0	0	0	0	0	0	0	0	0	0	0	0	0	0	0	0	0	0	0	0	0	0	0	0	0	0	0	0	1
DTXSID8048446	0	0	0	0	0	0	0	0	0	0	0	0	0	0	0	0	0	0	0	0	0	0	0	0	0	0	0	0	0	0	0	0	0	0	0	0	0	0	0	0	0	0	0	0	0	0	0	0	0
DTXSID3048449	0	0	0	0	0	0	0	0	0	0	0	0	0	0	0	0	0	0	0	0	0	0	0	0	0	0	0	0	0	0	0	0	0	0	0	0	0	0	0	0	0	0	0	0	0	0	0	0	0
DTXSID2048452	0	0	0	0	0	0	0	0	0	0	0	0	0	0	0	0	0	0	0	0	0	0	0	0	0	0	0	0	0	0	0	0	0	0	0	0	0	0	0	0	0	0	0	0	0	1	0	0	1
DTXSID1048465	0	0	0	0	0	0	0	0	0	0	0	0	0	0	0	0	0	0	0	0	0	0	0	0	0	0	0	0	0	0	0	0	0	0	0	0	0	0	0	0	0	0	0	0	0	0	0	0	1
DTXSID5048471	0	0	0	0	0	0	0	0	0	0	0	0	0	0	0	0	0	0	0	0	0	0	0	0	0	0	0	0	0	0	0	0	0	0	0	0	0	0	0	0	0	0	0	0	0	0	0	0	0
DTXSID0048472	0	0	0	0	0	0	0	0	0	0	0	0	0	0	0	0	0	0	0	0	0	0	0	0	0	0	0	0	0	0	0	0	0	0	0	0	0	0	0	0	0	0	0	0	0	1	0	0	1
DTXSID5048473	0	0	0	0	0	0	0	0	0	0	0	0	0	0	0	0	0	0	0	0	0	0	0	0	0	0	0	0	0	0	0	0	0	0	0	0	0	0	0	0	0	0	0	0	0	0	0	0	0
DTXSID0048476	0	0	0	0	0	0	0	0	0	0	0	0	0	0	0	0	0	0	0	0	0	0	0	0	0	0	0	0	0	0	0	0	0	0	0	0	0	0	0	0	0	0	0	0	0	0	0	0	0
DTXSID5048477	0	0	0	0	0	0	0	0	0	0	0	0	0	0	0	0	0	0	0	0	0	0	0	0	0	0	0	0	0	0	0	0	0	0	0	0	0	0	0	0	0	0	0	0	0	0	0	0	0
DTXSID4048482	0	0	0	0	0	0	0	0	0	0	0	0	0	0	0	0	0	0	0	0	0	0	0	0	0	0	0	0	0	0	0	0	0	0	0	0	0	0	0	0	0	0	0	0	0	0	0	0	0
DTXSID9048483	0	0	0	0	0	0	0	0	0	0	0	0	0	0	0	0	0	0	0	0	0	0	0	0	0	0	0	0	0	0	0	0	0	0	0	0	0	0	0	0	0	0	0	0	0	0	0	0	0
DTXSID4048484	0	0	0	0	0	0	0	0	0	0	0	0	0	0	0	0	0	0	0	0	0	0	0	0	0	0	0	0	0	0	0	0	0	0	0	0	0	0	0	0	0	0	0	0	0	0	0	0	0
DTXSID9048485	0	0	0	0	0	0	0	0	0	0	0	0	0	0	0	0	0	0	0	0	0	0	0	0	0	0	0	0	0	0	0	0	0	0	0	0	0	0	0	0	0	0	1	1	0	0	0	0	0
DTXSID9048724	0	0	0	0	0	0	0	0	0	0	0	0	0	0	0	0	0	0	0	0	0	0	0	0	0	0	0	0	0	0	0	0	0	0	0	0	0	0	0	0	0	1	0	1	0	0	0	0	0
DTXSID8048860	0	0	0	0	0	0	0	0	0	0	0	0	0	0	0	0	0	0	0	0	0	0	0	0	0	0	0	0	0	0	0	0	0	0	0	0	1	0	0	0	0	0	0	0	0	0	0	0	0
DTXSID8048999	0	0	0	0	0	0	0	0	0	0	0	0	0	0	0	0	1	0	0	0	0	0	0	0	0	0	0	0	0	0	0	0	0	0	0	1	1	0	0	0	0	0	0	0	0	0	0	0	0
DTXSID0049028	0	0	0	0	0	0	0	0	0	0	0	0	0	0	0	0	0	0	0	0	0	0	0	0	0	0	0	0	0	0	0	0	0	0	0	0	0	0	0	0	0	0	0	0	0	0	0	0	0
DTXSID4049082	0	0	0	0	0	0	0	0	0	0	0	0	0	0	0	0	0	0	0	0	0	0	0	0	0	0	0	0	0	0	0	0	0	0	0	1	1	0	0	0	0	0	0	0	0	0	0	0	0
DTXSID6051778	0	0	0	0	0	0	0	0	0	0	0	0	0	0	0	0	0	0	0	0	0	0	0	0	0	0	0	0	0	0	0	0	0	0	0	0	0	0	0	0	0	0	0	0	0	0	0	1	0
DTXSID3021069	0	0	0	0	0	0	0	0	0	0	0	0	0	0	0	0	0	0	0	0	0	0	0	0	0	0	0	0	0	0	0	0	0	0	0	0	0	0	0	0	0	0	0	0	0	0	0	0	0
DTXSID4020614	0	0	0	0	0	0	0	0	0	0	0	0	0	0	0	0	0	0	0	0	0	0	0	0	0	0	0	0	0	0	0	0	0	0	0	0	0	0	0	0	0	0	0	0	0	0	1	0	1
DTXSID5022724	0	0	0	0	0	0	0	0	0	0	0	0	0	0	0	0	0	0	0	0	0	0	0	0	0	0	0	0	0	0	0	0	0	0	0	0	0	0	0	0	0	0	0	0	0	0	0	0	0
DTXSID0033960	0	0	0	0	0	0	0	0	0	0	0	0	0	0	0	0	0	0	0	0	0	0	0	0	0	0	0	0	0	0	0	0	0	0	1	0	1	0	0	0	0	0	0	0	0	0	1	0	1
DTXSID7032004	0	0	0	0	0	0	0	0	0	0	0	0	0	0	0	0	0	0	0	0	0	0	0	0	0	0	0	0	0	0	0	0	0	0	1	0	1	0	0	0	0	0	0	0	0	0	0	0	0
DTXSID7037131	0	0	0	0	0	0	0	0	0	0	0	0	0	0	0	0	0	0	0	0	0	0	0	0	0	0	0	0	0	0	0	1	0	0	1	0	1	0	0	0	0	0	0	0	0	0	0	0	0
DTXSID3074311	0	0	0	0	0	0	0	0	0	0	0	0	0	0	0	0	0	0	0	0	0	0	0	0	0	0	0	0	0	0	0	0	0	0	0	0	0	0	0	0	0	0	0	0	0	0	0	0	1
DTXSID8062153	0	0	0	0	0	0	0	0	0	0	0	0	0	0	0	0	0	0	0	0	0	0	0	0	0	0	0	0	0	0	0	0	0	0	0	0	0	0	0	0	0	0	0	0	0	0	0	0	0
DTXSID4074988	0	0	0	0	0	0	0	0	0	0	0	0	0	0	0	0	0	0	0	0	0	0	0	0	0	0	0	0	0	0	0	0	0	0	0	0	0	0	0	0	0	0	0	0	0	0	0	0	0
DTXSID8075330	0	0	0	0	0	0	0	0	0	0	0	0	0	0	0	0	0	0	0	0	0	0	0	0	0	0	0	0	0	0	0	0	0	0	0	0	0	0	0	0	0	0	0	0	0	0	0	0	0
DTXSID50147555	0	0	0	0	0	0	0	0	0	0	0	0	0	0	0	0	0	0	0	0	0	0	0	0	0	0	0	0	0	0	0	0	0	0	0	0	0	0	0	0	0	0	0	0	0	0	0	0	0
DTXSID40151186	0	0	0	0	0	0	0	0	0	0	0	0	0	0	0	0	0	0	0	0	0	0	0	0	0	0	0	0	0	0	0	0	0	0	0	0	0	0	0	0	0	0	0	0	0	0	0	0	0
DTXSID40158453	0	0	0	0	0	0	0	0	0	0	0	0	0	0	0	0	1	0	0	0	0	0	0	0	0	0	0	0	0	0	0	0	0	0	1	0	1	0	0	0	0	0	0	0	0	0	0	0	0
DTXSID80162276	0	0	0	0	0	0	0	0	0	0	0	0	0	0	0	0	0	0	0	0	0	0	0	0	0	0	0	0	0	0	0	0	0	0	0	0	0	0	0	0	0	0	0	0	0	0	0	1	0
DTXSID40186498	0	0	0	0	0	0	0	0	0	0	0	0	0	0	0	0	0	0	0	0	0	0	0	0	0	0	0	0	0	0	0	0	0	0	1	0	1	0	0	0	0	0	0	0	0	0	0	0	0
DTXSID00186717	0	0	0	0	0	0	0	0	0	0	0	0	0	0	0	0	0	0	0	0	0	0	0	0	0	0	0	0	0	0	0	0	0	0	0	0	0	0	0	0	0	0	0	0	0	0	0	0	0
DTXSID20189583	0	0	0	0	0	0	0	0	0	0	0	0	0	0	0	0	0	0	0	0	0	0	0	0	0	0	0	0	0	0	0	0	0	0	0	0	0	0	0	0	0	0	0	0	0	0	0	0	0
DTXSID90190287	0	0	0	0	0	0	0	0	0	0	0	0	0	0	0	0	0	0	0	0	0	0	0	0	0	0	0	0	0	0	0	0	0	0	0	0	0	0	0	0	0	0	0	0	0	0	0	0	0
DTXSID10192627	0	0	0	0	0	0	0	0	0	0	0	0	0	0	0	0	0	0	0	0	0	0	0	0	0	0	0	0	0	0	0	0	0	0	0	0	0	0	0	0	0	0	0	0	0	0	0	1	0
DTXSID30196066	0	0	0	0	0	0	0	0	0	0	0	0	0	0	0	0	0	0	0	0	0	0	0	0	0	0	0	0	0	0	0	0	0	0	0	0	0	0	0	0	0	0	0	0	0	0	0	0	0
DTXSID00197383	0	0	0	0	0	0	0	0	0	0	0	0	0	0	0	0	0	0	0	0	0	0	0	0	0	0	0	0	0	0	0	0	0	0	0	0	0	0	0	0	0	0	0	0	0	0	0	0	0
DTXSID20197567	0	0	0	0	0	0	0	0	0	0	0	0	0	0	0	0	0	0	0	0	0	0	0	0	0	0	0	0	0	0	0	0	0	0	0	0	0	0	0	0	0	0	1	1	0	0	0	0	0
DTXSID80197568	0	0	0	0	0	0	0	0	0	0	0	0	0	0	0	0	0	0	0	0	0	0	0	0	0	0	0	0	0	0	0	0	0	0	0	0	0	0	0	0	0	0	0	0	0	0	0	0	0
DTXSID70197810	0	0	0	0	0	0	0	0	0	0	0	0	0	0	0	0	0	0	0	0	0	0	0	0	0	0	0	0	0	0	0	0	0	0	0	0	0	0	0	0	0	0	0	0	0	0	0	0	0
DTXSID30198146	0	0	0	0	0	0	0	0	0	0	0	0	0	0	0	0	0	0	0	0	0	0	0	0	0	0	0	0	0	0	0	0	0	0	0	0	0	0	0	0	0	0	0	0	0	0	0	0	0
DTXSID30199855	0	0	0	0	0	0	0	0	0	0	0	0	0	0	0	0	0	0	0	0	0	0	0	0	0	0	0	0	0	0	0	0	0	0	0	0	0	0	0	0	0	0	0	0	0	0	0	0	0
DTXSID50200412	0	0	0	0	0	0	0	0	0	0	0	1	1	0	1	0	0	0	0	0	0	0	0	0	0	0	0	0	0	0	0	0	0	0	0	1	1	0	0	0	0	0	0	0	0	0	0	0	0
DTXSID60203535	0	0	0	0	0	0	0	0	0	0	0	0	0	0	0	0	0	0	0	0	0	0	0	0	0	0	0	0	0	0	0	0	0	0	0	0	0	0	0	0	0	0	0	0	0	0	0	0	0
DTXSID90205421	0	0	0	0	0	0	0	0	0	0	0	0	0	0	0	0	0	0	0	0	0	0	0	0	0	0	0	0	0	0	0	0	0	0	1	0	1	0	0	0	0	0	0	0	0	0	0	0	0
DTXSID30221221	0	0	0	0	0	0	0	0	0	0	0	0	0	0	0	0	0	0	0	0	0	0	0	0	0	0	0	0	0	0	0	0	0	1	0	0	1	0	0	0	0	0	0	0	0	0	0	0	0
DTXSID80228528	0	0	0	0	0	0	0	0	0	0	0	0	0	0	0	0	0	0	0	0	0	0	0	0	0	0	0	0	0	0	0	0	0	0	1	0	1	0	0	0	0	0	0	0	0	0	0	1	0
DTXSID90232116	0	0	0	0	0	0	0	0	0	0	0	0	0	0	0	0	0	0	0	0	0	0	0	0	0	0	0	0	0	0	0	0	0	0	0	0	0	0	0	0	0	0	0	0	0	0	0	0	0
DTXSID70239325	0	0	0	0	0	0	0	0	0	0	0	0	0	0	0	0	0	0	0	0	0	0	0	0	0	0	0	0	0	0	0	0	0	0	1	0	1	0	0	0	0	0	0	0	0	0	0	0	0
DTXSID50274274	0	0	0	0	0	0	0	0	0	0	0	0	0	0	0	0	0	0	0	0	0	0	0	0	0	0	0	0	0	0	0	0	0	0	0	0	0	0	0	0	0	1	0	1	0	0	0	0	0
DTXSID20276043	0	0	0	0	0	0	0	0	0	0	0	0	0	0	0	0	0	0	0	0	0	0	0	0	0	0	0	0	0	0	0	0	0	0	0	0	0	0	0	0	0	1	0	1	0	0	0	0	0
DTXSID50329455	0	0	0	0	0	0	0	0	0	0	0	0	0	0	0	0	0	0	0	0	0	0	0	0	0	0	0	0	0	0	0	0	0	0	0	0	0	0	0	0	0	0	0	0	0	0	0	0	0
DTXSID70873208	0	0	0	0	0	0	0	0	0	0	0	0	0	0	0	0	0	0	0	0	0	0	0	0	0	0	0	0	0	0	0	0	0	0	1	1	1	0	0	0	1	0	0	1	0	0	0	0	0
DTXSID10873222	0	0	0	0	0	0	0	0	0	0	0	0	0	0	0	0	0	0	0	0	0	0	0	0	0	0	0	0	0	0	0	0	0	0	0	0	0	0	0	0	0	0	0	0	0	0	0	0	1
DTXSID90875143	0	0	0	0	0	0	0	0	0	0	0	0	0	0	0	0	0	0	0	0	0	0	0	0	0	0	0	0	0	0	0	0	0	0	0	0	0	0	0	0	0	0	0	0	0	0	0	0	0
DTXSID10876697	0	0	0	0	0	0	0	0	0	0	0	0	0	0	0	0	0	0	0	0	0	0	0	0	0	0	0	0	0	0	0	0	0	0	0	0	0	0	0	0	0	0	0	0	0	0	0	0	0
DTXSID40878487	0	0	0	0	0	0	0	0	0	0	0	0	0	0	0	0	0	0	0	0	0	0	0	0	0	0	0	0	0	0	0	0	0	0	0	0	0	0	0	0	0	0	0	0	0	0	0	0	0
DTXSID70878516	0	0	0	0	0	0	0	0	0	0	0	0	0	0	0	0	0	0	0	0	0	0	0	0	0	0	0	0	0	0	0	0	0	0	0	0	0	0	0	0	0	0	0	0	0	0	0	0	0
DTXSID30878577	0	0	0	0	0	0	0	0	0	0	0	0	0	0	0	0	0	0	0	0	0	0	0	0	0	0	0	0	0	0	0	0	0	0	0	0	0	0	0	0	0	0	0	0	0	0	0	0	0
DTXSID50881104	0	0	0	0	0	0	0	0	0	0	0	0	0	0	0	0	0	0	0	0	0	0	0	0	0	0	0	0	0	0	0	0	0	0	0	1	1	0	0	0	0	0	0	0	0	0	1	0	1
DTXSID9025087	0	0	0	0	0	0	0	0	0	0	0	0	0	0	0	0	0	0	0	0	0	0	0	0	0	0	0	0	0	0	0	0	0	0	0	1	1	0	0	0	0	0	0	0	0	0	0	0	0
DTXSID50894870	0	0	0	0	0	0	0	0	0	0	0	0	0	0	0	0	0	0	0	0	0	0	0	0	0	0	0	0	0	0	0	0	0	0	0	0	0	0	0	0	0	0	0	0	0	0	0	0	0
DTXSID80895057	0	0	0	0	0	0	0	0	0	0	0	0	0	0	0	0	0	0	0	0	0	0	0	0	0	0	0	0	0	0	0	0	0	0	0	0	0	0	0	0	0	0	0	0	0	0	0	0	0
DTXSID60897155	0	0	0	0	0	0	0	0	0	0	0	0	0	0	0	0	0	0	0	0	0	0	0	0	0	0	0	0	0	0	0	0	0	0	0	0	0	0	0	0	0	0	0	0	0	0	0	0	0
DTXSID00903966	0	0	0	0	0	0	0	0	0	0	0	0	0	0	0	0	0	0	0	0	0	0	0	0	0	0	0	0	0	0	0	0	0	0	0	0	0	0	0	0	0	0	0	0	0	0	0	1	0
DTXSID60904151	0	0	0	0	0	0	0	0	0	0	0	0	0	0	0	0	0	0	0	0	0	0	0	0	0	0	0	0	0	0	0	0	0	0	0	0	0	0	0	0	0	0	0	0	0	0	0	1	0
[truncated: 680 more columns]

## Sheet: Clustering_results
ids	chem_name	SMILES	CLSZ_0.9	CLID_0.9	CLSZ_0.85	CLID_0.85	CLSZ_0.8	CLID_0.8	CLSZ_0.75	CLID_0.75	CLSZ_0.7	CLID_0.7	CLSZ_0.65	CLID_0.65	Positive	Negative
DTXSID9022811	chlortetracycline	CN(C)[C@H]1[C@@H]2C[C@H]3C(=C(O)[C@]2(O)C(=O)C(C(N)=O)=C1O)C(=O)C1=C(C(Cl)=CC=C1O)[C@@]3(C)O	6	127	7	127	7	127	7	127	7	127	8	127	NA	Negative
DTXSID1022893	demeclocycline	CN(C)[C@H]1[C@@H]2C[C@@H]3[C@H](O)C4=C(C(O)=CC=C4Cl)C(=O)C3=C(O)[C@]2(O)C(=O)C(C(N)=O)=C1O	6	127	7	127	7	127	7	127	7	127	8	127	NA	Negative
DTXSID2023272	methacycline	CN(C)[C@H]1[C@@H]2[C@@H](O)[C@@H]3C(=C)C4=C(C(O)=CC=C4)C(=O)C3=C(O)[C@]2(O)C(=O)C(C(N)=O)=C1O	6	127	7	127	7	127	7	127	7	127	8	127	NA	Negative
DTXSID7023645	tetracycline	[H][C@@]12C[C@@]3([H])C(=C(O)[C@]1(O)C(=O)C(C(N)=O)=C(O)[C@H]2N(C)C)C(=O)C1=C(C=CC=C1O)[C@@]3(C)O	6	127	7	127	7	127	7	127	7	127	8	127	NA	Negative
DTXSID1034260	oxytetracycline	CN(C)[C@H]1[C@@H]2[C@@H](O)[C@H]3C(=C(O)[C@]2(O)C(=O)C(C(N)=O)=C1O)C(=O)C1=C(C=CC=C1O)[C@@]3(C)O	6	127	7	127	7	127	7	127	7	127	8	127	NA	Negative
DTXSID0037653	doxycycline	C[C@@H]1[C@H]2[C@H](O)[C@H]3[C@H](N(C)C)C(O)=C(C(N)=O)C(=O)[C@@]3(O)C(O)=C2C(=O)C2=C1C=CC=C2O	6	127	7	127	7	127	7	127	7	127	8	127	NA	Negative
DTXSID6021290	sulfamethazine	CC1=CC(C)=NC(NS(=O)(=O)C2=CC=C(N)C=C2)=N1	5	50	5	50	5	50	5	50	5	50	5	50	NA	Negative
DTXSID1023607	sulfadimethoxine	COC1=NC(OC)=NC(NS(=O)(=O)C2=CC=C(N)C=C2)=C1	5	50	5	50	5	50	5	50	5	50	5	50	NA	Negative
DTXSID0023612	sulfamerazine	CC1=CC=NC(NS(=O)(=O)C2=CC=C(N)C=C2)=N1	5	50	5	50	5	50	5	50	5	50	5	50	NA	Negative
DTXSID7044130	sulfadiazine	NC1=CC=C(C=C1)S(=O)(=O)NC1=NC=CC=N1	5	50	5	50	5	50	5	50	5	50	5	50	NA	Negative
DTXSID8045351	sulfamonomethoxine	COC1=NC=NC(NS(=O)(=O)C2=CC=C(N)C=C2)=C1	5	50	5	50	5	50	5	50	5	50	5	50	NA	Negative
DTXSID7020714	hydrocortisone	C[C@]12C[C@H](O)[C@H]3[C@@H](CCC4=CC(=O)CC[C@]34C)[C@@H]1CC[C@]2(O)C(=O)CO	4	70	7	70	16	14	17	14	23	14	25	14	NA	Negative
DTXSID8022371	testosterone	C[C@]12CC[C@H]3[C@@H](CCC4=CC(=O)CC[C@]34C)[C@@H]1CC[C@@H]2O	4	70	7	70	16	14	17	14	23	14	25	14	NA	Negative
DTXSID6022474	corticosterone	C[C@]12C[C@H](O)[C@H]3[C@@H](CCC4=CC(=O)CC[C@]34C)[C@@H]1CC[C@@H]2C(=O)CO	4	70	7	70	16	14	17	14	23	14	25	14	NA	Negative
DTXSID6045371	medrysone	C[C@H]1C[C@H]2[C@@H]3CC[C@H](C(C)=O)[C@@]3(C)C[C@H](O)[C@@H]2[C@@]2(C)CCC(=O)C=C12	4	70	7	70	16	14	17	14	23	14	25	14	NA	Negative
DTXSID7020768	kaempferol	OC1=CC=C(C=C1)C1=C(O)C(=O)C2=C(O1)C=C(O)C=C2O	3	25	6	25	7	25	7	25	11	25	13	25	Positive	NA
DTXSID4021218	quercetin	OC1=CC2=C(C(O)=C1)C(=O)C(O)=C(O2)C1=CC(O)=C(O)C=C1	3	25	6	25	7	25	7	25	11	25	13	25	NA	Negative
DTXSID8022400	myricetin	OC1=CC2=C(C(O)=C1)C(=O)C(O)=C(O2)C1=CC(O)=C(O)C(O)=C1	3	25	6	25	7	25	7	25	11	25	13	25	Positive	NA
DTXSID5022853	cloxacillin	CC1=C(C(=O)N[C@H]2[C@H]3SC(C)(C)[C@@H](N3C2=O)C(O)=O)C(=NO1)C1=CC=CC=C1Cl	3	139	3	139	3	139	3	139	14	90	14	90	NA	Negative
DTXSID1022924	dicloxacillin	CC1=C(C(=O)N[C@H]2[C@H]3SC(C)(C)[C@@H](N3C2=O)C(O)=O)C(=NO1)C1=C(Cl)C=CC=C1Cl	3	139	3	139	3	139	3	139	14	90	14	90	NA	Negative
DTXSID8023056	floxacillin	CC1=C(C(=O)N[C@H]2[C@H]3SC(C)(C)[C@@H](N3C2=O)C(O)=O)C(=NO1)C1=C(F)C=CC=C1Cl	3	139	3	139	3	139	3	139	14	90	14	90	NA	Negative
DTXSID6023157	iohexol	CC(=O)N(CC(O)CO)C1=C(I)C(C(=O)NCC(O)CO)=C(I)C(C(=O)NCC(O)CO)=C1I	3	196	4	196	4	196	4	196	4	196	4	196	NA	Negative
DTXSID0023163	iopromide	COCC(=O)NC1=C(I)C(C(=O)NCC(O)CO)=C(I)C(C(=O)N(C)CC(O)CO)=C1I	3	196	4	196	4	196	4	196	4	196	4	196	NA	Negative
DTXSID2045521	ioversol	OCCN(C(=O)CO)C1=C(I)C(C(=O)NCC(O)CO)=C(I)C(C(=O)NCC(O)CO)=C1I	3	196	4	196	4	196	4	196	4	196	4	196	NA	Negative
DTXSID4023046	fenoterol	CC(CC1=CC=C(O)C=C1)NCC(O)C1=CC(O)=CC(O)=C1	3	200	7	200	10	42	10	42	18	273	22	38	NA	Negative
DTXSID4023175	isoproterenol	CC(C)NCC(O)C1=CC=C(O)C(O)=C1	3	200	7	200	10	42	10	42	18	273	22	38	NA	Negative
DTXSID8048529	metaproterenol	CC(C)NCC(O)C1=CC(O)=CC(O)=C1	3	200	7	200	10	42	10	42	18	273	22	38	NA	Negative
DTXSID1022396	chrysin	OC1=CC2=C(C(O)=C1)C(=O)C=C(O2)C1=CC=CC=C1	3	575	6	25	7	25	7	25	11	25	13	25	NA	Negative
DTXSID4074988	luteolin	OC1=CC(O)=C2C(=O)C=C(OC2=C1)C1=CC(O)=C(O)C=C1	3	575	6	25	7	25	7	25	11	25	13	25	NA	Negative
DTXSID00197383	acacetin	COC1=CC=C(C=C1)C1=CC(=O)C2=C(O)C=C(O)C=C2O1	3	575	6	25	7	25	7	25	11	25	13	25	Positive	NA
DTXSID0020074	gabapentin	NCC1(CC(O)=O)CCCCC1	2	3	2	3	2	3	2	3	2	3	2	3	NA	Negative
DTXSID3045350	tranexamic acid	NC[C@H]1CC[C@@H](CC1)C(O)=O	2	3	2	3	2	3	2	3	2	3	2	3	NA	Negative
DTXSID2020713	hydrochlorothiazide	NS(=O)(=O)C1=CC2=C(NCNS2(=O)=O)C=C1Cl	2	21	3	21	4	21	4	21	7	21	7	21	NA	Negative
DTXSID4022868	cyclopenthiazide	NS(=O)(=O)C1=C(Cl)C=C2NC(CC3CCCC3)NS(=O)(=O)C2=C1	2	21	3	21	4	21	4	21	7	21	7	21	NA	Negative
DTXSID6021080	omeprazole	COC1=CC2=C(NC(=N2)S(=O)CC2=C(C)C(OC)=C(C)C=N2)C=C1	2	33	2	33	2	33	2	33	3	33	3	33	NA	Negative
DTXSID1040617	sulmazole	COC1=C(C=CC(=C1)S(C)=O)C1=NC2=C(N1)C=CC=N2	2	33	2	33	2	33	2	33	3	33	3	33	NA	Negative
DTXSID7021237	reserpine	[H][C@]12C[C@@H](OC(=O)C3=CC(OC)=C(OC)C(OC)=C3)[C@H](OC)[C@@H](C(=O)OC)[C@@]1([H])C[C@@]1([H])N(CCC3=C1NC1=C3C=CC(OC)=C1)C2	2	46	2	46	2	46	2	46	3	46	38	6	NA	Negative
DTXSID9023629	syrosingopine	CCOC(=O)OC1=C(OC)C=C(C=C1OC)C(=O)O[C@@H]1C[C@@H]2CN3CCC4=C(NC5=C4C=CC(OC)=C5)[C@H]3C[C@@H]2[C@@H]([C@H]1OC)C(=O)OC	2	46	2	46	2	46	2	46	3	46	38	6	Positive	NA
DTXSID6022478	naringin	C[C@@H]1O[C@@H](O[C@@H]2[C@@H](O)[C@H](O)[C@@H](CO)O[C@H]2OC2=CC3=C(C(=O)C[C@H](O3)C3=CC=C(O)C=C3)C(O)=C2)[C@H](O)[C@H](O)[C@H]1O	2	77	2	77	2	77	3	584	11	25	13	25	NA	Negative
DTXSID9044328	hesperidin	COC1=C(O)C=C(C=C1)[C@@H]1CC(=O)C2=C(O1)C=C(O[C@@H]1O[C@H](CO[C@@H]3O[C@@H](C)[C@H](O)[C@@H](O)[C@H]3O)[C@@H](O)[C@H](O)[C@H]1O)C=C2O	2	77	2	77	2	77	3	584	11	25	13	25	NA	Negative
DTXSID0022690	bromperidol	OC1(CCN(CCCC(=O)C2=CC=C(F)C=C2)CC1)C1=CC=C(Br)C=C1	2	104	2	104	2	104	2	104	2	104	2	104	NA	Negative
DTXSID4034150	haloperidol	OC1(CCN(CCCC(=O)C2=CC=C(F)C=C2)CC1)C1=CC=C(Cl)C=C1	2	104	2	104	2	104	2	104	2	104	2	104	NA	Negative
DTXSID4034150	haloperidol	OC1(CCN(CCCC(=O)C2=CC=C(F)C=C2)CC1)C1=CC=C(Cl)C=C1	2	104	2	104	2	104	2	104	2	104	2	104	NA	Negative
DTXSID3022748	cefaclor	N[C@@H](C(=O)N[C@H]1[C@H]2SCC(Cl)=C(N2C1=O)C(O)=O)C1=CC=CC=C1	2	121	2	121	2	121	8	90	14	90	14	90	NA	Negative
DTXSID9022780	cephalexin	CC1=C(N2[C@H](SC1)[C@H](NC(=O)[C@H](N)C1=CC=CC=C1)C2=O)C(O)=O	2	121	2	121	2	121	8	90	14	90	14	90	NA	Negative
DTXSID0022808	chlorpromazine	CN(C)CCCN1C2=C(SC3=C1C=C(Cl)C=C3)C=CC=C2	2	125	2	125	3	125	7	125	7	125	9	125	Positive	NA
DTXSID0022808	chlorpromazine	CN(C)CCCN1C2=C(SC3=C1C=C(Cl)C=C3)C=CC=C2	2	125	2	125	3	125	7	125	7	125	9	125	NA	Negative
DTXSID7023514	prochlorperazine	CN1CCN(CCCN2C3=CC=CC=C3SC3=C2C=C(Cl)C=C3)CC1	2	125	2	125	3	125	7	125	7	125	9	125	Positive	NA
DTXSID7023514	prochlorperazine	CN1CCN(CCCN2C3=CC=CC=C3SC3=C2C=C(Cl)C=C3)CC1	2	125	2	125	3	125	7	125	7	125	9	125	NA	Negative
DTXSID3022821	cinnarizine	C(\C=C\C1=CC=CC=C1)N1CCN(CC1)C(C1=CC=CC=C1)C1=CC=CC=C1	2	130	2	130	2	130	2	130	2	130	38	6	NA	Negative
DTXSID6045616	flunarizine	FC1=CC=C(C=C1)C(N1CCN(C\C=C\C2=CC=CC=C2)CC1)C1=CC=C(F)C=C1	2	130	2	130	2	130	2	130	2	130	38	6	NA	Negative
DTXSID3023009	ethaverine	CCOC1=C(OCC)C=C(CC2=NC=CC3=CC(OCC)=C(OCC)C=C23)C=C1	2	167	2	167	2	167	2	167	2	167	2	167	NA	Negative
DTXSID4023418	papaverine	COC1=CC=C(CC2=NC=CC3=CC(OC)=C(OC)C=C23)C=C1OC	2	167	2	167	2	167	2	167	2	167	2	167	NA	Negative
DTXSID2023016	ethisterone	[H][C@@]12CC[C@@](O)(C#C)[C@@]1(C)CC[C@@]1([H])[C@@]2([H])CCC2=CC(=O)CC[C@]12C	2	168	7	70	16	14	17	14	23	14	25	14	NA	Negative
DTXSID3036496	levonorgestrel	[H][C@@]12CC[C@@](O)(C#C)[C@@]1(CC)CC[C@]1([H])[C@@]3([H])CCC(=O)C=C3CC[C@@]21[H]	2	168	7	70	16	14	17	14	23	14	25	14	Positive	NA
DTXSID5022647	bendroflumethiazide	NS(=O)(=O)C1=C(C=C2NC(CC3=CC=CC=C3)NS(=O)(=O)C2=C1)C(F)(F)F	2	192	2	192	2	192	2	192	7	21	7	21	NA	Negative
DTXSID3023132	hydroflumethiazide	NS(=O)(=O)C1=C(C=C2NCNS(=O)(=O)C2=C1)C(F)(F)F	2	192	2	192	2	192	2	192	7	21	7	21	NA	Negative
DTXSID8023183	josamycin	COC1[C@@H](CC(=O)O[C@H](C)C\C=C\C=C\[C@H](O)[C@H](C)C[C@H](CC=O)[C@@H]1O[C@@H]1O[C@H](C)[C@@H](O[C@H]2C[C@@](C)(O)[C@H](OC(=O)CC(C)C)[C@H](C)O2)[C@@H]([C@H]1O)N(C)C)OC(C)=O	2	203	2	203	2	203	2	203	2	203	2	203	NA	Negative
DTXSID5045463	midecamycin	CCC(=O)O[C@H]1[C@H](C)O[C@H](C[C@@]1(C)O)O[C@@H]1[C@@H](C)O[C@@H](O[C@H]2[C@@H](CC=O)C[C@@H](C)[C@@H](O)\C=C\C=C\C[C@@H](C)OC(=O)C[C@@H](OC(=O)CC)[C@@H]2OC)[C@H](O)[C@H]1N(C)C	2	203	2	203	2	203	2	203	2	203	2	203	NA	Negative
DTXSID3023265	mesoridazine	CN1CCCCC1CCN1C2=CC=CC=C2SC2=C1C=C(C=C2)S(C)=O	2	216	2	216	2	216	2	216	2	216	2	216	NA	Negative
DTXSID6023656	thioridazine	CSC1=CC2=C(SC3=CC=CC=C3N2CCC2CCCCN2C)C=C1	2	216	2	216	2	216	2	216	2	216	2	216	Positive	NA
DTXSID6023656	thioridazine	CSC1=CC2=C(SC3=CC=CC=C3N2CCC2CCCCN2C)C=C1	2	216	2	216	2	216	2	216	2	216	2	216	Positive	NA
DTXSID1023368	niflumic acid	OC(=O)C1=CC=CN=C1NC1=CC=CC(=C1)C(F)(F)F	2	234	2	234	3	182	3	182	4	182	4	182	NA	Negative
DTXSID4048565	flunixin	CC1=C(C=CC=C1NC1=NC=CC=C1C(O)=O)C(F)(F)F	2	234	2	234	3	182	3	182	4	182	4	182	NA	Negative
DTXSID0023373	nitrendipine	CCOC(=O)C1=C(C)NC(C)=C(C1C1=CC=CC(=C1)[N+]([O-])=O)C(=O)OC	2	235	2	235	2	235	2	235	2	235	4	175	NA	Negative
DTXSID2025715	nifedipine	COC(=O)C1=C(C)NC(C)=C(C1C1=CC=CC=C1[N+]([O-])=O)C(=O)OC	2	235	2	235	2	235	2	235	2	235	4	175	NA	Negative
DTXSID3023423	pargyline	CN(CC#C)CC1=CC=CC=C1	2	244	2	244	2	244	2	244	2	244	2	244	NA	Negative
DTXSID6023575	selegiline	C[C@H](CC1=CC=CC=C1)N(C)CC#C	2	244	2	244	2	244	2	244	2	244	2	244	NA	Negative
DTXSID6023525	propranolol	CC(C)NCC(O)COC1=C2C=CC=CC2=CC=C1	2	273	2	273	2	273	4	273	18	273	22	38	NA	Negative
DTXSID3045304	dexpropranolol	CC(C)NC[C@@H](O)COC1=C2C=CC=CC2=CC=C1	2	273	2	273	2	273	4	273	18	273	22	38	NA	Negative
DTXSID5023538	pyrantel	CN1CCCN=C1\C=C\C1=CC=CS1	2	275	2	275	2	275	2	275	2	275	2	275	NA	Negative
DTXSID9048562	morantel	CN1CCCN=C1\C=C\C1=C(C)C=CS1	2	275	2	275	2	275	2	275	2	275	2	275	NA	Negative
DTXSID4023549	quinidine	[H][C@@]1(C[C@@H]2CC[N@]1C[C@@H]2C=C)[C@@H](O)C1=CC=NC2=CC=C(OC)C=C12	2	278	2	278	3	278	3	278	3	278	3	278	NA	Negative
DTXSID6045082	cinchonine	O[C@H]([C@H]1CC2CCN1C[C@@H]2C=C)C1=CC=NC2=C1C=CC=C2	2	278	2	278	3	278	3	278	3	278	3	278	NA	Negative
DTXSID9025409	hydrastine	COC1=C(OC)C2=C(C=C1)[C@H](OC2=O)[C@@H]1N(C)CCC2=C1C=C1OCOC1=C2	2	317	2	317	5	317	5	317	7	317	7	317	NA	Negative
DTXSID3042687	bicuculline	[H][C@]1(OC(=O)C2=C1C=CC1=C2OCO1)[C@@]1([H])N(C)CCC2=C1C=C1OCOC1=C2	2	317	2	317	5	317	5	317	7	317	7	317	NA	Negative
DTXSID2029872	econazole	ClC1=CC=C(COC(CN2C=CN=C2)C2=C(Cl)C=C(Cl)C=C2)C=C1	2	326	2	326	2	326	3	326	3	326	3	326	Positive	NA
DTXSID7045447	isoconazole	ClC1=CC(Cl)=C(C=C1)C(CN1C=CN=C1)OCC1=C(Cl)C=CC=C1Cl	2	326	2	326	2	326	3	326	3	326	3	326	Positive	NA
DTXSID7037680	norfloxacin	CCN1C=C(C(O)=O)C(=O)C2=CC(F)=C(C=C12)N1CCNCC1	2	344	3	344	4	344	6	344	6	344	7	34	NA	Negative
DTXSID4040680	lomefloxacin	CCN1C=C(C(O)=O)C(=O)C2=C1C(F)=C(N1CCNC(C)C1)C(F)=C2	2	344	3	344	4	344	6	344	6	344	7	34	NA	Negative
DTXSID6045169	metoclopramide	CCN(CC)CCNC(=O)C1=CC(Cl)=C(N)C=C1OC	2	410	2	410	2	410	3	410	4	133	4	133	NA	Negative
DTXSID0045383	bromopride	CCN(CC)CCNC(=O)C1=CC(Br)=C(N)C=C1OC	2	410	2	410	2	410	3	410	4	133	4	133	NA	Negative
DTXSID9045502	prednicarbate	CCOC(=O)O[C@@]1(CC[C@H]2[C@@H]3CCC4=CC(=O)C=C[C@]4(C)[C@H]3[C@@H](O)C[C@]12C)C(=O)COC(=O)CC	2	468	2	468	16	14	17	14	23	14	25	14	NA	Negative
DTXSID6045535	alclometasone dipropionate	CCC(=O)OCC(=O)[C@@]1(OC(=O)CC)[C@H](C)C[C@H]2[C@@H]3[C@H](Cl)CC4=CC(=O)C=C[C@]4(C)[C@H]3[C@@H](O)C[C@]12C	2	468	2	468	16	14	17	14	23	14	25	14	Positive	NA
DTXSID6047866	propoxycaine	CCCOC1=CC(N)=CC=C1C(=O)OCCN(CC)CC	2	506	2	506	3	397	3	397	5	397	6	66	NA	Negative
DTXSID30198146	proxymetacaine	CCCOC1=C(N)C=C(C=C1)C(=O)OCCN(CC)CC	2	506	2	506	3	397	3	397	5	397	6	66	NA	Negative
DTXSID1045409	tolfenamic acid	CC1=C(Cl)C=CC=C1NC1=C(C=CC=C1)C(O)=O	2	534	3	150	3	150	3	150	3	150	3	150	NA	Negative
DTXSID0048559	meclofenamic acid	CC1=C(Cl)C(NC2=CC=CC=C2C(O)=O)=C(Cl)C=C1	2	534	3	150	3	150	3	150	3	150	3	150	NA	Negative
DTXSID6051778	digoxigenin	C[C@@]12[C@H](CC[C@]1(O)[C@@H]1CC[C@@H]3C[C@@H](O)CC[C@]3(C)[C@H]1C[C@H]2O)C1=CC(=O)OC1	2	566	3	566	3	566	3	566	6	153	6	153	Positive	NA
DTXSID80162276	digitoxigenin	C[C@]12CC[C@H]3[C@@H](CC[C@@H]4C[C@@H](O)CC[C@]34C)[C@@]1(O)CC[C@@H]2C1=CC(=O)OC1	2	566	3	566	3	566	3	566	6	153	6	153	Positive	NA
DTXSID30196066	harmine	COC1=CC2=C(C=C1)C1=C(N2)C(C)=NC=C1	2	586	2	586	2	586	4	586	4	586	4	586	NA	Negative
DTXSID80197568	harman	CC1=NC=CC2=C1NC1=CC=CC=C21	2	586	2	586	2	586	4	586	4	586	4	586	NA	Negative
DTXSID5022724	canadine	COC1=CC=C2CC3N(CCC4=C3C=C3OCOC3=C4)CC2=C1OC	2	594	3	594	5	317	5	317	7	317	7	317	NA	Negative
DTXSID60203535	hydrocotarnine	COC1=C2CN(C)CCC2=CC2=C1OCO2	2	594	3	594	5	317	5	317	7	317	7	317	NA	Negative
DTXSID2020006	acetaminophen	CC(=O)NC1=CC=C(O)C=C1	1	1	1	1	1	1	1	1	1	1	1	1	NA	Negative
DTXSID3020043	allantoin	NC(=O)NC1NC(=O)NC1=O	1	2	1	2	1	2	1	2	1	2	1	2	NA	Negative
DTXSID5020108	aspirin	CC(=O)OC1=C(C=CC=C1)C(O)=O	1	4	1	4	1	4	1	4	1	4	1	4	NA	Negative
DTXSID9020110	astemizole	COC1=CC=C(CCN2CCC(CC2)NC2=NC3=CC=CC=C3N2CC2=CC=C(F)C=C2)C=C1	1	5	1	5	1	5	1	5	1	5	1	5	Positive	NA
DTXSID4020113	atropine	CN1[C@H]2CC[C@@H]1C[C@@H](C2)OC(=O)C(CO)C1=CC=CC=C1	1	6	1	6	1	6	1	6	5	6	38	6	NA	Negative
DTXSID4020113	atropine	CN1[C@H]2CC[C@@H]1C[C@@H](C2)OC(=O)C(CO)C1=CC=CC=C1	1	6	1	6	1	6	1	6	5	6	38	6	NA	Negative
DTXSID4020119	azathioprine	CN1C=NC(=C1SC1=NC=NC2=C1NC=N2)[N+]([O-])=O	1	7	1	7	1	7	1	7	1	7	1	7	NA	Negative
DTXSID5020231	caffeic acid	OC(=O)C=CC1=CC(O)=C(O)C=C1	1	8	1	8	1	8	1	8	1	8	1	8	NA	Negative
DTXSID9020241	capsaicin	COC1=C(O)C=CC(CNC(=O)CCCC\C=C\C(C)C)=C1	1	9	1	9	1	9	1	9	1	9	1	9	NA	Negative
DTXSID7020263	chlorambucil	OC(=O)CCCC1=CC=C(C=C1)N(CCCl)CCCl	1	10	1	10	1	10	1	10	1	10	1	10	NA	Negative
DTXSID9020322	chlorpropamide	CCCNC(=O)NS(=O)(=O)C1=CC=C(Cl)C=C1	1	11	1	11	1	11	1	11	1	11	2	11	NA	Negative
DTXSID0020369	dacarbazine	CN(C)N=NC1=C(NC=N1)C(N)=O	1	12	1	12	1	12	1	12	1	12	1	12	NA	Negative
DTXSID4020371	dapsone	NC1=CC=C(C=C1)S(=O)(=O)C1=CC=C(N)C=C1	1	13	1	13	1	13	1	13	1	13	1	13	NA	Negative
DTXSID4020379	dehydroepiandrosterone	[H][C@@]12CCC(=O)[C@@]1(C)CC[C@@]1([H])[C@@]2([H])CC=C2C[C@@H](O)CC[C@]12C	1	14	1	14	16	14	17	14	23	14	25	14	NA	Negative
DTXSID3020465	diethylstilbestrol	CC\C(=C(\CC)C1=CC=C(O)C=C1)C1=CC=C(O)C=C1	1	15	1	15	1	15	1	15	1	15	1	15	Positive	NA
DTXSID9020582	ethoxyquin	CCOC1=CC2=C(NC(C)(C)C=C2C)C=C1	1	16	1	16	1	16	1	16	1	16	1	16	NA	Negative
DTXSID9020615	etodolac	CCC1=CC=CC2=C1NC1=C2CCOC1(CC)CC(O)=O	1	17	1	17	1	17	1	17	1	17	1	17	NA	Negative
DTXSID2020636	fluvastatin	CC(C)N1C(\C=C\[C@@H](O)C[C@@H](O)CC(O)=O)=C(C2=C1C=CC=C2)C1=CC=C(F)C=C1	1	18	1	18	1	18	1	18	1	18	1	18	NA	Negative
DTXSID0020652	gemfibrozil	CC1=CC(OCCCC(C)(C)C(O)=O)=C(C)C=C1	1	19	1	19	1	19	1	19	1	19	1	19	NA	Negative
DTXSID8020674	griseofulvin	COC1=CC(OC)=C(Cl)C2=C1C(=O)[C@]1(O2)[C@H](C)CC(=O)C=C1OC	1	20	1	20	1	20	1	20	1	20	1	20	NA	Negative
DTXSID9020740	indomethacin	COC1=CC2=C(C=C1)N(C(=O)C1=CC=C(Cl)C=C1)C(C)=C2CC(O)=O	1	23	1	23	2	23	2	23	2	23	2	23	NA	Negative
DTXSID8020755	isoniazid	NNC(=O)C1=CC=NC=C1	1	24	1	24	1	24	1	24	1	24	1	24	NA	Negative
DTXSID5020784	lovastatin	[H][C@]12[C@H](C[C@@H](C)C=C1C=C[C@H](C)[C@@H]2CC[C@@H]1C[C@@H](O)CC(=O)O1)OC(=O)[C@@H](C)CC	1	26	2	26	2	26	2	26	2	26	2	26	NA	Negative
DTXSID0020814	mestranol	COC1=CC2=C(C=C1)[C@H]1CC[C@@]3(C)[C@@H](CC[C@@]3(O)C#C)[C@@H]1CC2	1	27	1	27	1	27	1	27	1	27	1	27	Positive	NA
DTXSID4020822	methotrexate	CN(CC1=NC2=C(N=C1)N=C(N)N=C2N)C1=CC=C(C=C1)C(=O)N[C@@H](CCC(O)=O)C(O)=O	1	28	1	28	1	28	1	28	1	28	1	28	NA	Negative
DTXSID2020892	metronidazole	CC1=NC=C(N1CCO)[N+]([O-])=O	1	29	1	29	1	29	1	29	1	29	1	29	NA	Negative
DTXSID9020902	monocrotaline	C[C@H]1C(=O)O[C@@H]2CCN3CC=C(COC(=O)[C@](C)(O)[C@]1(C)O)[C@H]23	1	30	1	30	2	30	2	30	2	30	2	30	NA	Negative
DTXSID5020944	nitrofurazone	NC(=O)NN=CC1=CC=C(O1)[N+]([O-])=O	1	31	1	31	1	31	4	31	5	31	5	31	NA	Negative
DTXSID7020972	nitrofurantoin	[O-][N+](=O)C1=CC=C(O1)C=NN1CC(=O)NC1=O	1	32	2	32	3	369	4	31	5	31	5	31	NA	Negative
DTXSID1021089	oxolinic acid	CCN1C=C(C(O)=O)C(=O)C2=CC3=C(OCO3)C=C12	1	34	1	34	1	34	1	34	1	34	7	34	NA	Negative
DTXSID1021116	phenacetin	CCOC1=CC=C(NC(C)=O)C=C1	1	35	1	35	1	35	1	35	1	35	1	35	NA	Negative
DTXSID6021117	phenazone	CN1N(C(=O)C=C1C)C1=CC=CC=C1	1	36	1	36	2	36	2	36	2	36	4	36	NA	Negative
DTXSID1021162	pilocarpine	CC[C@H]1[C@@H](CC2=CN=CN2C)COC1=O	1	37	1	37	1	37	1	37	1	37	1	37	NA	Negative
DTXSID0021179	practolol	CC(C)NCC(O)COC1=CC=C(NC(C)=O)C=C1	1	38	1	38	1	38	1	38	1	38	22	38	NA	Negative
DTXSID9021182	praziquantel	O=C(C1CCCCC1)N1CC2N(CCC3=C2C=CC=C3)C(=O)C1	1	39	1	39	1	39	1	39	1	39	1	39	NA	Negative
DTXSID9021188	probenecid	CCCN(CCC)S(=O)(=O)C1=CC=C(C=C1)C(O)=O	1	40	1	40	1	40	1	40	1	40	1	40	NA	Negative
DTXSID4021189	procarbazine	CNNCC1=CC=C(C=C1)C(=O)NC(C)C	1	41	1	41	1	41	1	41	1	41	1	41	NA	Negative
DTXSID8021193	pronethalol	CC(C)NCC(O)C1=CC2=CC=CC=C2C=C1	1	42	1	42	10	42	10	42	18	273	22	38	NA	Negative
DTXSID9021215	pyrazinamide	NC(=O)C1=NC=CN=C1	1	43	1	43	1	43	1	43	1	43	1	43	NA	Negative
DTXSID9021217	pyrimethamine	CCC1=NC(N)=NC(N)=C1C1=CC=C(Cl)C=C1	1	44	1	44	1	44	1	44	1	44	1	44	NA	Negative
DTXSID6021242	retrorsine	C\C=C1\C[C@@H](C)[C@](O)(CO)C(=O)OCC2=CCN3CC[C@@H](OC1=O)[C@@H]23	1	47	1	47	2	30	2	30	2	30	2	30	NA	Negative
DTXSID5021255	albuterol	CC(C)(C)NCC(O)C1=CC=C(O)C(CO)=C1	1	48	1	48	10	42	10	42	18	273	22	38	NA	Negative
DTXSID0021256	sulfasalazine	OC(=O)C1=CC(=CC=C1O)\N=N\C1=CC=C(C=C1)S(=O)(=O)NC1=NC=CC=C1	1	49	1	49	1	49	1	49	1	49	1	49	NA	Negative
DTXSID6021296	suxibuzone	CCCCC1(COC(=O)CCC(O)=O)C(=O)N(N(C1=O)C1=CC=CC=C1)C1=CC=CC=C1	1	51	1	51	1	51	1	51	1	51	1	51	NA	Negative
DTXSID7021310	terbutaline	CC(C)(C)NCC(O)C1=CC(O)=CC(O)=C1	1	52	7	200	10	42	10	42	18	273	22	38	NA	Negative
DTXSID1021322	disulfiram	CCN(CC)C(=S)SSC(=S)N(CC)CC	1	53	1	53	1	53	1	53	1	53	1	53	Positive	NA
DTXSID5021336	theophylline	CN1C2=C(NC=N2)C(=O)N(C)C1=O	1	54	1	54	1	54	1	54	3	54	3	54	NA	Negative
DTXSID0021337	thiabendazole	N1C2=C(C=CC=C2)N=C1C1=CSC=N1	1	55	1	55	1	55	1	55	1	55	1	55	NA	Negative
DTXSID5021338	thiamphenicol	CS(=O)(=O)C1=CC=C(C=C1)[C@@H](O)[C@@H](CO)NC(=O)C(Cl)Cl	1	56	1	56	2	56	2	56	2	56	2	56	NA	Negative
DTXSID3021358	tolazamide	CC1=CC=C(C=C1)S(=O)(=O)NC(=O)NN1CCCCCC1	1	57	1	57	1	57	1	57	2	57	2	57	NA	Negative
DTXSID8021359	tolbutamide	CCCCNC(=O)NS(=O)(=O)C1=CC=C(C)C=C1	1	58	1	58	1	58	1	58	1	58	2	11	NA	Negative
DTXSID0021389	trichlorfon	COP(=O)(OC)C(O)C(Cl)(Cl)Cl	1	59	1	59	1	59	1	59	1	59	1	59	NA	Negative
DTXSID9021396	trimethadione	CN1C(=O)OC(C)(C)C1=O	1	60	1	60	1	60	1	60	1	60	1	60	NA	Negative
DTXSID9021425	urapidil	COC1=C(C=CC=C1)N1CCN(CCCNC2=CC(=O)N(C)C(=O)N2C)CC1	1	61	1	61	1	61	1	61	1	61	1	61	NA	Negative
DTXSID4021478	lynestrenol	C[C@]12CC[C@H]3[C@@H](CCC4=CCCC[C@H]34)[C@@H]1CC[C@]2(O)C#C	1	62	1	62	1	62	2	62	23	14	25	14	NA	Negative
DTXSID8021480	doxorubicin	COC1=C2C(=O)C3=C(C(O)=C4C[C@](O)(C[C@H](O[C@H]5C[C@H](N)[C@H](O)[C@H](C)O5)C4=C3O)C(=O)CO)C(=O)C2=CC=C1	1	63	1	63	1	63	1	63	1	63	1	63	NA	Negative
DTXSID4021715	menadione	CC1=CC(=O)C2=C(C=CC=C2)C1=O	1	64	1	64	1	64	1	64	1	64	1	64	Positive	NA
DTXSID8021777	riboflavin	CC1=CC2=C(C=C1C)N(C[C@H](O)[C@H](O)[C@H](O)CO)C1=NC(=O)NC(=O)C1=N2	1	65	1	65	1	65	1	65	1	65	1	65	NA	Negative
DTXSID8021804	benzocaine	CCOC(=O)C1=CC=C(N)C=C1	1	66	1	66	1	66	1	66	1	66	6	66	NA	Negative
DTXSID8022117	amantadine	NC12CC3CC(CC(C3)C1)C2	1	67	2	67	2	67	2	67	2	67	2	67	NA	Negative
DTXSID4022369	fulvestrant	C[C@]12CC[C@H]3[C@H]([C@@H]1CC[C@@H]2O)[C@H](CCCCCCCCCS(=O)CCCC(F)(F)C(F)(F)F)CC1=C3C=CC(O)=C1	1	68	1	68	1	68	1	68	1	68	1	68	NA	Negative
DTXSID4022369	fulvestrant	C[C@]12CC[C@H]3[C@H]([C@@H]1CC[C@@H]2O)[C@H](CCCCCCCCCS(=O)CCCC(F)(F)C(F)(F)F)CC1=C3C=CC(O)=C1	1	68	1	68	1	68	1	68	1	68	1	68	NA	Negative
DTXSID3022370	progesterone	[H][C@@]12CC[C@H](C(C)=O)[C@@]1(C)CC[C@@]1([H])[C@@]2([H])CCC2=CC(=O)CC[C@]12C	1	69	7	70	16	14	17	14	23	14	25	14	NA	Negative
DTXSID7022382	dienestrol	CC=C(C(=CC)C1=CC=C(O)C=C1)C1=CC=C(O)C=C1	1	71	1	71	1	71	1	71	1	71	1	71	NA	Negative
DTXSID1022392	naringenin	OC1=CC=C(C=C1)[C@@H]1CC(=O)C2=C(O1)C=C(O)C=C2O	1	72	1	72	7	25	7	25	11	25	13	25	NA	Negative
DTXSID5022437	nordihydroguaiaretic acid	CC(CC1=CC(O)=C(O)C=C1)C(C)CC1=CC=C(O)C(O)=C1	1	75	1	75	1	75	1	75	1	75	2	75	NA	Negative
DTXSID7022540	acemetacin	COC1=CC=C2N(C(=O)C3=CC=C(Cl)C=C3)C(C)=C(CC(=O)OCC(O)=O)C2=C1	1	78	1	78	2	23	2	23	2	23	2	23	NA	Negative
DTXSID2022541	acenocoumarol	CC(=O)CC(C1=CC=C(C=C1)[N+]([O-])=O)C1=C(O)C2=CC=CC=C2OC1=O	1	79	1	79	1	79	1	79	1	79	1	79	NA	Negative
DTXSID7022544	acetazolamide	CC(=O)NC1=NN=C(S1)S(N)(=O)=O	1	80	1	80	1	80	1	80	1	80	2	80	NA	Negative
DTXSID1022556	acyclovir	NC1=NC2=C(N=CN2COCCO)C(=O)N1	1	81	1	81	2	81	2	81	2	81	2	81	NA	Negative
DTXSID9022576	alphaxalone	CC(=O)[C@H]1CC[C@H]2[C@@H]3CC[C@H]4C[C@H](O)CC[C@]4(C)[C@H]3C(=O)C[C@]12C	1	82	1	82	1	82	1	82	1	82	25	14	NA	Negative
DTXSID8022583	ambroxol	NC1=C(Br)C=C(Br)C=C1CN[C@H]1CC[C@H](O)CC1	1	83	1	83	1	83	1	83	1	83	2	83	NA	Negative
DTXSID3022586	amikacin	NCC[C@H](O)C(=O)N[C@@H]1C[C@H](N)[C@@H](O[C@H]2O[C@H](CN)[C@@H](O)[C@H](O)[C@H]2O)[C@H](O)[C@H]1O[C@H]1O[C@H](CO)[C@@H](O)[C@H](N)[C@H]1O	1	84	1	84	1	84	1	84	3	84	4	84	NA	Negative
DTXSID7022592	amiodarone	CCCCC1=C(C(=O)C2=CC(I)=C(OCCN(CC)CC)C(I)=C2)C2=CC=CC=C2O1	1	85	1	85	1	85	1	85	1	85	1	85	NA	Negative
DTXSID7022594	amitriptyline	CN(C)CCC=C1C2=CC=CC=C2CCC2=C1C=CC=C2	1	86	1	86	1	86	1	86	1	86	2	86	NA	Negative
DTXSID2022597	amodiaquine	CCN(CC)CC1=C(O)C=CC(NC2=CC=NC3=CC(Cl)=CC=C23)=C1	1	87	1	87	1	87	1	87	1	87	1	87	NA	Negative
DTXSID7022598	amoxapine	ClC1=CC=C2OC3=C(C=CC=C3)N=C(N3CCNCC3)C2=C1	1	88	1	88	1	88	2	88	2	88	3	88	Positive	NA
DTXSID9022601	amphotericin b	C[C@H]1O[C@@H](O[C@@H]2C[C@@H]3O[C@@](O)(C[C@H](O)[C@H]3C(O)=O)C[C@@H](O)C[C@@H](O)[C@H](O)CC[C@@H](O)C[C@@H](O)CC(=O)O[C@@H](C)[C@H](C)[C@H](O)[C@@H](C)\C=C\C=C\C=C\C=C\C=C\C=C\C=C\2)[C@@H](O)[C@@H](N)[C@@H]1O	1	89	1	89	1	89	1	89	1	89	1	89	NA	Negative
DTXSID4022602	ampicillin	CC1(C)S[C@@H]2[C@H](NC(=O)[C@H](N)C3=CC=CC=C3)C(=O)N2[C@H]1C(O)=O	1	90	2	90	3	90	8	90	14	90	14	90	NA	Negative
DTXSID9022603	amrinone	NC1=CC(=CNC1=O)C1=CC=NC=C1	1	91	1	91	1	91	1	91	1	91	1	91	NA	Negative
DTXSID3022613	antazoline	C(N(CC1=CC=CC=C1)C1=CC=CC=C1)C1=NCCN1	1	92	1	92	1	92	1	92	2	92	2	92	NA	Negative
DTXSID8022614	apomorphine	CN1CCC2=CC=CC3=C2[C@H]1CC1=C3C(O)=C(O)C=C1	1	93	1	93	2	93	2	93	2	93	2	93	NA	Negative
DTXSID3022617	arecoline	COC(=O)C1=CCCN(C)C1	1	94	1	94	1	94	1	94	1	94	1	94	NA	Negative
DTXSID7022629	atovaquone	OC1=C([C@H]2CC[C@@H](CC2)C2=CC=C(Cl)C=C2)C(=O)C2=CC=CC=C2C1=O	1	95	1	95	1	95	1	95	1	95	1	95	NA	Negative
DTXSID1022639	azlocillin	CC1(C)S[C@@H]2[C@H](NC(=O)[C@@H](NC(=O)N3CCNC3=O)C3=CC=CC=C3)C(=O)N2[C@H]1C(O)=O	1	96	1	96	3	90	8	90	14	90	14	90	NA	Negative
DTXSID0022640	aztreonam	C[C@H]1[C@H](NC(=O)C(=NOC(C)(C)C(O)=O)C2=CSC(N)=N2)C(=O)N1S(O)(=O)=O	1	97	1	97	1	97	1	97	1	97	1	97	NA	Negative
DTXSID9022655	benzonatate	CCCCNC1=CC=C(C=C1)C(=O)OCCOCCOCCOCCOCCOCCOCCOCCOCCOC	1	99	1	99	1	99	1	99	1	99	1	99	NA	Negative
DTXSID3022663	bepridil	CC(C)COCC(CN(CC1=CC=CC=C1)C1=CC=CC=C1)N1CCCC1	1	100	1	100	1	100	1	100	1	100	1	100	Positive	NA
DTXSID6022680	biperiden	OC(CCN1CCCCC1)(C1CC2CC1C=C2)C1=CC=CC=C1	1	101	1	101	3	402	4	402	10	502	38	6	NA	Negative
DTXSID1022681	bisacodyl	CC(=O)OC1=CC=C(C=C1)C(C1=CC=C(OC(C)=O)C=C1)C1=NC=CC=C1	1	102	1	102	1	102	1	102	1	102	1	102	Positive	NA
DTXSID6022682	bisoprolol	CC(C)NCC(O)COC1=CC=C(COCCOC(C)C)C=C1	1	103	1	103	2	221	2	221	18	273	22	38	NA	Negative
DTXSID5022699	bumetanide	CCCCNC1=CC(=CC(=C1OC1=CC=CC=C1)S(N)(=O)=O)C(O)=O	1	105	1	105	1	105	1	105	1	105	1	105	NA	Negative
DTXSID2022703	bupivacaine	CCCCN1CCCCC1C(=O)NC1=C(C)C=CC=C1C	1	106	1	106	1	106	1	106	1	106	1	106	NA	Negative
DTXSID7022706	bupropion	CC(NC(C)(C)C)C(=O)C1=CC=CC(Cl)=C1	1	107	1	107	1	107	1	107	1	107	1	107	NA	Negative
DTXSID9022730	carbachol	[Cl-].C[N+](C)(C)CCOC(N)=O	1	108	1	108	1	108	1	108	1	108	1	108	NA	Negative
DTXSID4022733	carbenoxolone	CC1(C)[C@H](CC[C@@]2(C)[C@H]1CC[C@]1(C)[C@@H]2C(=O)C=C2[C@@H]3C[C@](C)(CC[C@]3(C)CC[C@@]12C)C(O)=O)OC(=O)CCC(O)=O	1	109	1	109	1	109	1	109	23	14	25	14	NA	Negative
DTXSID3022746	carteolol	CC(C)(C)NCC(O)COC1=C2CCC(=O)NC2=CC=C1	1	110	1	110	1	110	1	110	1	110	22	38	NA	Negative
DTXSID2022753	cefazolin	CC1=NN=C(SCC2=C(N3[C@H](SC2)[C@H](NC(=O)CN2C=NN=N2)C3=O)C(O)=O)S1	1	112	1	112	1	112	3	112	7	112	7	112	NA	Negative
DTXSID7022754	cefixime	NC1=NC(=CS1)C(=NOCC(O)=O)C(=O)N[C@H]1[C@H]2SCC(C=C)=C(N2C1=O)C(O)=O	1	113	1	113	1	113	2	113	3	113	3	113	NA	Negative
DTXSID7022756	cefmetazole	CO[C@]1(NC(=O)CSCC#N)[C@H]2SCC(CSC3=NN=NN3C)=C(N2C1=O)C(O)=O	1	114	1	114	2	114	3	112	7	112	7	112	NA	Negative
DTXSID2022759	cefoperazone	CCN1CCN(C(=O)N[C@@H](C(=O)N[C@H]2[C@H]3SCC(CSC4=NN=NN4C)=C(N3C2=O)C(O)=O)C2=CC=C(O)C=C2)C(=O)C1=O	1	115	1	115	1	115	1	115	1	115	1	115	NA	Negative
DTXSID1022760	ceforanide	NCC1=CC=CC=C1CC(=O)N[C@H]1[C@H]2SCC(CSC3=NN=NN3CC(O)=O)=C(N2C1=O)C(O)=O	1	116	1	116	1	116	1	116	14	90	14	90	NA	Negative
DTXSID1022762	cefotetan	CO[C@]1(NC(=O)C2SC(S2)=C(C(N)=O)C(O)=O)[C@H]2SCC(CSC3=NN=NN3C)=C(N2C1=O)C(O)=O	1	117	1	117	2	114	3	112	7	112	7	112	NA	Negative
DTXSID6022763	cefotiam	CN(C)CCN1N=NN=C1SCC1=C(N2[C@H](SC1)[C@H](NC(=O)CC1=CSC(N)=N1)C2=O)C(O)=O	1	118	1	118	1	118	1	118	3	113	3	113	NA	Negative
DTXSID1022764	cefoxitin	CO[C@]1(NC(=O)CC2=CC=CS2)[C@H]2SCC(COC(N)=O)=C(N2C1=O)C(O)=O	1	119	1	119	1	119	4	119	7	112	7	112	NA	Negative
DTXSID5022774	cefuroxime	CON=C(C(=O)N[C@H]1[C@H]2SCC(COC(N)=O)=C(N2C1=O)C(O)=O)C1=CC=CO1	1	120	1	120	1	120	4	119	7	112	7	112	NA	Negative
DTXSID4022783	cephalothin	CC(=O)OCC1=C(N2[C@H](SC1)[C@H](NC(=O)CC1=CC=CS1)C2=O)C(O)=O	1	122	1	122	1	122	4	119	7	112	7	112	NA	Negative
DTXSID4022787	cetirizine	OC(=O)COCCN1CCN(CC1)C(C1=CC=CC=C1)C1=CC=C(Cl)C=C1	1	123	1	123	1	123	1	123	2	123	38	6	NA	Negative
DTXSID3022798	chlormezanone	CN1C(C2=CC=C(Cl)C=C2)S(=O)(=O)CCC1=O	1	124	1	124	1	124	1	124	1	124	1	124	NA	Negative
DTXSID4022810	chlorprothixene	CN(C)CC\C=C1/C2=CC=CC=C2SC2=C1C=C(Cl)C=C2	1	126	1	126	1	126	1	126	1	126	9	125	Positive	NA
DTXSID4022812	chlorthalidone	NS(=O)(=O)C1=C(Cl)C=CC(=C1)C1(O)NC(=O)C2=CC=CC=C12	1	128	1	128	1	128	1	128	1	128	2	128	NA	Negative
DTXSID9022813	chlorzoxazone	ClC1=CC=C2OC(=O)NC2=C1	1	129	1	129	1	129	1	129	1	129	1	129	NA	Negative
DTXSID8022822	cinoxacin	CCN1N=C(C(O)=O)C(=O)C2=CC3=C(OCO3)C=C12	1	131	1	131	1	131	1	131	1	131	1	131	NA	Negative
DTXSID8022824	ciprofloxacin	OC(=O)C1=CN(C2CC2)C2=CC(N3CCNCC3)=C(F)C=C2C1=O	1	132	3	344	4	344	6	344	6	344	7	34	NA	Negative
DTXSID3022825	cisapride	COC1CN(CCCOC2=CC=C(F)C=C2)CCC1NC(=O)C1=CC(Cl)=C(N)C=C1OC	1	133	1	133	1	133	1	133	4	133	4	133	NA	Negative
DTXSID7022833	clenbuterol	CC(C)(C)NCC(O)C1=CC(Cl)=C(N)C(Cl)=C1	1	134	1	134	1	134	1	134	1	134	2	83	NA	Negative
DTXSID2022836	clindamycin	CCC[C@@H]1C[C@H](N(C)C1)C(=O)N[C@H]([C@H](C)Cl)[C@H]1O[C@H](SC)[C@H](O)[C@@H](O)[C@H]1O	1	135	1	135	1	135	1	135	1	135	1	135	NA	Negative
DTXSID7022837	clioquinol	OC1=C2N=CC=CC2=C(Cl)C=C1I	1	136	1	136	1	136	1	136	1	136	1	136	Positive	NA
DTXSID7022839	clofazimine	CC(C)\N=C1\C=C2N(C3=CC=C(Cl)C=C3)C3=CC=CC=C3N=C2C=C1NC1=CC=C(Cl)C=C1	1	137	1	137	1	137	1	137	1	137	1	137	NA	Negative
DTXSID1022847	clopamide	CC1CCCC(C)N1NC(=O)C1=CC=C(Cl)C(=C1)S(N)(=O)=O	1	138	1	138	1	138	1	138	1	138	1	138	NA	Negative
DTXSID5022855	clozapine	CN1CCN(CC1)C1=NC2=CC(Cl)=CC=C2NC2=C1C=CC=C2	1	140	1	140	1	140	1	140	1	140	3	88	NA	Negative
DTXSID4022864	cyclizine	CN1CCN(CC1)C(C1=CC=CC=C1)C1=CC=CC=C1	1	141	1	141	1	141	1	141	1	141	38	6	NA	Negative
DTXSID8022872	cyproheptadine	CN1CCC(CC1)=C1C2=C(C=CC=C2)C=CC2=C1C=CC=C2	1	143	1	143	1	143	1	143	1	143	2	143	Positive	NA
DTXSID2022880	danazol	C[C@]12CC[C@H]3[C@@H](CCC4=CC5=C(C[C@]34C)C=NO5)[C@@H]1CC[C@@]2(O)C#C	1	144	1	144	1	144	2	62	23	14	25	14	Positive	NA
DTXSID7022881	dantrolene	[O-][N+](=O)C1=CC=C(C=C1)C1=CC=C(O1)C=NN1CC(=O)NC1=O	1	145	2	32	3	369	4	31	5	31	5	31	NA	Negative
DTXSID2022888	dehydrocholic acid	C[C@H](CCC(O)=O)[C@H]1CC[C@H]2[C@H]3[C@H](CC(=O)[C@]12C)[C@@]1(C)CCC(=O)C[C@H]1CC3=O	1	146	1	146	1	146	1	146	1	146	1	146	NA	Negative
DTXSID3022908	dextromethorphan	[H][C@]12CCCC[C@]11CCN(C)[C@H]2CC2=C1C=C(OC)C=C2	1	148	1	148	1	148	1	148	1	148	1	148	NA	Negative
DTXSID7022914	diazoxide	CC1=NC2=CC=C(Cl)C=C2S(=O)(=O)N1	1	149	1	149	1	149	1	149	7	21	7	21	NA	Negative
DTXSID6022923	diclofenac	OC(=O)CC1=C(NC2=C(Cl)C=CC=C2Cl)C=CC=C1	1	150	3	150	3	150	3	150	3	150	3	150	NA	Negative
DTXSID5022932	diflunisal	OC(=O)C1=C(O)C=CC(=C1)C1=C(F)C=C(F)C=C1	1	152	1	152	1	152	1	152	1	152	1	152	NA	Negative
DTXSID5022934	digoxin	C[C@H]1O[C@H](C[C@H](O)[C@@H]1O)O[C@H]1[C@@H](O)C[C@H](O[C@H]2[C@@H](O)C[C@H](O[C@H]3CC[C@@]4(C)[C@H](CC[C@@H]5[C@@H]4C[C@@H](O)[C@]4(C)[C@H](CC[C@]54O)C4=CC(=O)OC4)C3)O[C@@H]2C)O[C@@H]1C	1	153	2	153	3	153	3	153	6	153	6	153	Positive	NA
DTXSID9022946	dinoprost	CCCCC[C@H](O)\C=C\[C@H]1[C@H](O)C[C@H](O)[C@@H]1C\C=C/CCCC(O)=O	1	154	1	154	1	154	1	154	1	154	1	154	NA	Negative
DTXSID9022948	diphemanil methylsulfate	COS([O-])(=O)=O.C[N+]1(C)CCC(CC1)=C(C1=CC=CC=C1)C1=CC=CC=C1	1	155	1	155	1	155	1	155	1	155	1	155	NA	Negative
DTXSID4022949	diphenhydramine	CN(C)CCOC(C1=CC=CC=C1)C1=CC=CC=C1	1	156	2	156	2	156	2	156	6	161	38	6	NA	Negative
DTXSID3022952	diphenylpyraline	CN1CCC(CC1)OC(C1=CC=CC=C1)C1=CC=CC=C1	1	157	1	157	1	157	3	502	10	502	38	6	NA	Negative
DTXSID7022960	dorzolamide	CCN[C@H]1C[C@H](C)S(=O)(=O)C2=C1C=C(S2)S(N)(=O)=O	1	158	1	158	1	158	2	158	2	158	2	158	NA	Negative
DTXSID7022964	doxazosin	COC1=C(OC)C=C2C(N)=NC(=NC2=C1)N1CCN(CC1)C(=O)C1COC2=C(O1)C=CC=C2	1	159	1	159	3	159	3	159	4	159	4	159	NA	Negative
DTXSID7022966	doxepin	CN(C)CC\C=C1/C2=C(COC3=C1C=CC=C3)C=CC=C2	1	160	1	160	1	160	1	160	1	160	2	86	NA	Negative
DTXSID1022970	doxylamine	CN(C)CCOC(C)(C1=CC=CC=C1)C1=NC=CC=C1	1	161	1	161	1	161	2	161	6	161	38	6	NA	Negative
DTXSID5022980	emetine	CC[C@H]1CN2CCC3=C(C=C(OC)C(OC)=C3)[C@@H]2C[C@@H]1C[C@H]1NCCC2=CC(OC)=C(OC)C=C12	1	162	1	162	1	162	1	162	1	162	1	162	NA	Negative
DTXSID4022991	erythromycin	CC[C@H]1OC(=O)[C@H](C)[C@@H](O[C@H]2C[C@@](C)(OC)[C@@H](O)[C@H](C)O2)[C@H](C)[C@@H](O[C@@H]2O[C@H](C)C[C@@H]([C@H]2O)N(C)C)[C@](C)(O)C[C@@H](C)C(=O)[C@H](C)[C@@H](O)[C@]1(C)O	1	163	1	163	1	163	2	163	3	163	3	163	NA	Negative
DTXSID3023005	estropipate	C1CNCCN1.C[C@]12CC[C@H]3[C@@H](CCC4=C3C=CC(OS(O)(=O)=O)=C4)[C@@H]1CCC2=O	1	164	1	164	1	164	1	164	1	164	1	164	NA	Negative
DTXSID8023006	ethambutol	CC[C@@H](CO)NCCN[C@@H](CC)CO	1	165	1	165	1	165	1	165	1	165	1	165	NA	Negative
DTXSID3023007	ethamivan	CCN(CC)C(=O)C1=CC(OC)=C(O)C=C1	1	166	1	166	1	166	1	166	1	166	1	166	NA	Negative
DTXSID7023019	ethosuximide	CCC1(C)CC(=O)NC1=O	1	169	1	169	1	169	1	169	1	169	1	169	NA	Negative
DTXSID6023020	ethotoin	CCN1C(=O)NC(C1=O)C1=CC=CC=C1	1	170	1	170	1	170	1	170	1	170	1	170	NA	Negative
DTXSID1023029	etilefrine	CCNCC(O)C1=CC=CC(O)=C1	1	171	7	200	10	42	10	42	18	273	22	38	NA	Negative
DTXSID5023031	etofylline	CN1C2=C(N(CCO)C=N2)C(=O)N(C)C1=O	1	172	1	172	1	172	2	274	3	54	3	54	NA	Negative
DTXSID5023033	etomidate	CCOC(=O)C1=CN=CN1C(C)C1=CC=CC=C1	1	173	1	173	1	173	1	173	1	173	1	173	NA	Negative
DTXSID5023039	famotidine	NC(N)=NC1=NC(CSCCC(N)=NS(N)(=O)=O)=CS1	1	174	1	174	1	174	1	174	1	174	1	174	NA	Negative
DTXSID4023042	felodipine	CCOC(=O)C1=C(C)NC(C)=C(C1C1=CC=CC(Cl)=C1Cl)C(=O)OC	1	175	1	175	1	175	1	175	1	175	4	175	Positive	NA
DTXSID9023045	fenoprofen	CC(C(O)=O)C1=CC(OC2=CC=CC=C2)=CC=C1	1	176	1	176	1	176	1	176	1	176	2	176	NA	Negative
DTXSID4023048	fenspiride	O=C1NCC2(CCN(CCC3=CC=CC=C3)CC2)O1	1	178	1	178	1	178	1	178	1	178	1	178	NA	Negative
DTXSID3023059	flucytosine	NC1=NC(=O)NC=C1F	1	180	1	180	1	180	1	180	1	180	1	180	NA	Negative
DTXSID7023061	fludrocortisone	C[C@]12C[C@H](O)[C@@]3(F)[C@@H](CCC4=CC(=O)CC[C@]34C)[C@@H]1CC[C@]2(O)C(=O)CO	1	181	1	181	16	14	17	14	23	14	25	14	Positive	NA
DTXSID7023063	flufenamic acid	OC(=O)C1=C(NC2=CC(=CC=C2)C(F)(F)F)C=CC=C1	1	182	1	182	3	182	3	182	4	182	4	182	NA	Negative
DTXSID2023068	fluphenazine	OCCN1CCN(CCCN2C3=CC=CC=C3SC3=CC=C(C=C23)C(F)(F)F)CC1	1	183	1	183	1	183	7	125	7	125	9	125	Positive	NA
DTXSID5023085	fusaric acid	CCCCC1=CN=C(C=C1)C(O)=O	1	184	1	184	1	184	1	184	1	184	1	184	NA	Negative
DTXSID0023086	fusidic acid	C[C@@H]1[C@H](O)CC[C@@]2(C)[C@H]1CC[C@@]1(C)[C@H]2[C@H](O)C[C@H]2\C([C@H](C[C@]12C)OC(C)=O)=C(/CCC=C(C)C)C(O)=O	1	185	1	185	1	185	1	185	1	185	1	185	NA	Negative
DTXSID5023089	gallamine triethiodide	[I-].[I-].[I-].CC[N+](CC)(CC)CCOC1=CC=CC(OCC[N+](CC)(CC)CC)=C1OCC[N+](CC)(CC)CC	1	186	1	186	1	186	1	186	1	186	1	186	NA	Negative
DTXSID9023095	gliclazide	CC1=CC=C(C=C1)S(=O)(=O)NC(=O)NN1CC2CCCC2C1	1	187	1	187	1	187	1	187	2	57	2	57	NA	Negative
DTXSID5023110	gossypol	CC(C)C1=C(O)C(O)=C(C=O)C2=C(O)C(=C(C)C=C12)C1=C(O)C2=C(C=O)C(O)=C(O)C(C(C)C)=C2C=C1C	1	188	1	188	1	188	1	188	1	188	2	75	Positive	NA
DTXSID5023116	guanethidine	NC(=N)NCCN1CCCCCCC1	1	189	1	189	1	189	1	189	1	189	1	189	NA	Negative
DTXSID0023119	halofantrine	CCCCN(CCCC)CCC(O)C1=CC2=C(C=C(Cl)C=C2Cl)C2=C1C=CC(=C2)C(F)(F)F	1	190	1	190	1	190	1	190	1	190	1	190	NA	Negative
DTXSID4023129	hydralazine	NNC1=NN=CC2=CC=CC=C12	1	191	1	191	1	191	1	191	1	191	1	191	NA	Negative
DTXSID8023137	hydroxyzine	OCCOCCN1CCN(CC1)C(C1=CC=CC=C1)C1=CC=C(Cl)C=C1	1	193	1	193	1	193	1	193	2	123	38	6	NA	Negative
DTXSID2023143	imipenem	[H][C@]12CC(SCCNC=N)=C(N1C(=O)[C@]2([H])[C@@H](C)O)C(O)=O	1	194	1	194	1	194	2	194	2	194	2	194	NA	Negative
DTXSID2023149	iocetamic acid	CC(CN(C(C)=O)C1=C(I)C=C(I)C(N)=C1I)C(O)=O	1	195	1	195	1	195	1	195	1	195	1	195	NA	Negative
DTXSID1023158	iopamidol	C[C@H](O)C(=O)NC1=C(I)C(C(=O)NC(CO)CO)=C(I)C(C(=O)NC(CO)CO)=C1I	1	197	4	196	4	196	4	196	4	196	4	196	NA	Negative
DTXSID6023159	iopanoic acid	CCC(CC1=C(I)C=C(I)C(N)=C1I)C(O)=O	1	198	1	198	1	198	1	198	1	198	1	198	NA	Negative
DTXSID9023178	isoxsuprine	CC(COC1=CC=CC=C1)NC(C)C(O)C1=CC=C(O)C=C1	1	201	7	200	10	42	10	42	18	273	22	38	Positive	NA
DTXSID4023179	isradipine	COC(=O)C1=C(C)NC(C)=C(C1C1=CC=CC2=NON=C12)C(=O)OC(C)C	1	202	1	202	1	202	1	202	1	202	4	175	NA	Negative
DTXSID8023189	ketorolac	OC(=O)C1CCN2C1=CC=C2C(=O)C1=CC=CC=C1	1	204	1	204	1	204	1	204	1	204	3	204	NA	Negative
DTXSID7023190	ketotifen	CN1CCC(CC1)=C1C2=C(SC=C2)C(=O)CC2=CC=CC=C12	1	205	1	205	1	205	1	205	2	205	2	205	NA	Negative
DTXSID2023191	labetalol	CC(CCC1=CC=CC=C1)NCC(O)C1=CC=C(O)C(=C1)C(N)=O	1	206	1	206	1	206	1	206	18	273	22	38	Positive	NA
DTXSID7023198	lanatoside c	C[C@H]1O[C@H](C[C@H](O)[C@@H]1O[C@H]1C[C@H](O)[C@H](O[C@H]2C[C@H](OC(C)=O)[C@H](O[C@@H]3O[C@H](CO)[C@@H](O)[C@H](O)[C@H]3O)[C@@H](C)O2)[C@@H](C)O1)O[C@H]1CC[C@@]2(C)[C@H](CC[C@@H]3[C@@H]2C[C@@H](O)[C@]2(C)[C@H](CC[C@]32O)C2=CC(=O)OC2)C1	1	207	1	207	3	153	3	153	6	153	6	153	Positive	NA
DTXSID4023200	lansoprazole	CC1=C(OCC(F)(F)F)C=CN=C1CS(=O)C1=NC2=CC=CC=C2N1	1	208	1	208	1	208	1	208	3	33	3	33	NA	Negative
DTXSID9023201	leflunomide	CC1=C(C=NO1)C(=O)NC1=CC=C(C=C1)C(F)(F)F	1	209	1	209	1	209	1	209	2	209	2	209	NA	Negative
DTXSID4023206	levamisole	C1CN2C[C@@H](N=C2S1)C1=CC=CC=C1	1	210	1	210	1	210	1	210	1	210	1	210	NA	Negative
DTXSID8023212	levopropoxyphene	CCC(=O)O[C@](CC1=CC=CC=C1)([C@@H](C)CN(C)C)C1=CC=CC=C1	1	211	1	211	1	211	1	211	1	211	1	211	NA	Negative
DTXSID3023217	lisuride	[H][C@@]12CC3=CNC4=CC=CC(=C34)C1=C[C@@H](CN2C)NC(=O)N(CC)CC	1	212	1	212	2	477	3	477	3	477	38	6	NA	Negative
DTXSID3023219	lobeline	CN1[C@H](C[C@H](O)C2=CC=CC=C2)CCC[C@@H]1CC(=O)C1=CC=CC=C1	1	213	1	213	1	213	2	551	5	6	38	6	NA	Negative
DTXSID7023229	loxapine	CN1CCN(CC1)C1=NC2=CC=CC=C2OC2=C1C=C(Cl)C=C2	1	214	1	214	1	214	2	88	2	88	3	88	NA	Negative
DTXSID6023238	mebeverine	CCN(CCCCOC(=O)C1=CC(OC)=C(OC)C=C1)C(C)CC1=CC=C(OC)C=C1	1	215	1	215	1	215	1	215	2	215	2	215	NA	Negative
DTXSID7023271	methacholine chloride	[Cl-].CC(C[N+](C)(C)C)OC(C)=O	1	217	1	217	1	217	1	217	1	217	1	217	NA	Negative
DTXSID2023278	methapyrilene	CN(C)CCN(CC1=CC=CS1)C1=CC=CC=N1	1	219	1	219	1	219	1	219	1	219	1	219	NA	Negative
DTXSID1023281	methazolamide	CN1N=C(SC1=NC(C)=O)S(N)(=O)=O	1	220	1	220	1	220	1	220	1	220	2	80	NA	Negative
DTXSID2023309	metoprolol	COCCC1=CC=C(OCC(O)CNC(C)C)C=C1	1	221	1	221	2	221	2	221	18	273	22	38	NA	Negative
DTXSID1023310	metrizamide	CN(C(C)=O)C1=C(I)C(NC(C)=O)=C(I)C(C(=O)N[C@H]2C(O)O[C@H](CO)[C@@H](O)[C@@H]2O)=C1I	1	222	1	222	1	222	1	222	1	222	1	222	NA	Negative
DTXSID6023317	mianserin	CN1CCN2C(C1)C1=CC=CC=C1CC1=C2C=CC=C1	1	223	1	223	1	223	1	223	1	223	1	223	NA	Negative
DTXSID0023321	midodrine	COC1=CC=C(OC)C(=C1)C(O)CNC(=O)CN	1	224	1	224	1	224	1	224	1	224	1	224	NA	Negative
DTXSID5023322	mifepristone	CC#C[C@]1(O)CC[C@H]2[C@@H]3CCC4=CC(=O)CCC4=C3[C@H](C[C@]12C)C1=CC=C(C=C1)N(C)C	1	225	1	225	1	225	1	225	23	14	25	14	Positive	NA
DTXSID5023324	milrinone	CC1=C(C=C(C#N)C(=O)N1)C1=CC=NC=C1	1	226	1	226	1	226	1	226	1	226	1	226	NA	Negative
DTXSID4023333	mometasone furoate	C[C@@H]1C[C@H]2[C@@H]3CCC4=CC(=O)C=C[C@]4(C)[C@@]3(Cl)[C@@H](O)C[C@]2(C)[C@@]1(OC(=O)C1=CC=CO1)C(=O)CCl	1	227	1	227	1	227	1	227	23	14	25	14	Positive	NA
DTXSID4023335	moricizine	CCOC(=O)NC1=CC2=C(SC3=CC=CC=C3N2C(=O)CCN2CCOCC2)C=C1	1	228	1	228	1	228	1	228	1	228	1	228	NA	Negative
DTXSID3023342	nadolol	CC(C)(C)NCC(O)COC1=CC=CC2=C1C[C@H](O)[C@H](O)C2	1	229	1	229	1	229	1	229	1	229	1	229	NA	Negative
DTXSID8023343	nafcillin	CCOC1=C(C(=O)N[C@H]2[C@H]3SC(C)(C)[C@@H](N3C2=O)C(O)=O)C2=C(C=CC=C2)C=C1	1	230	1	230	2	252	8	90	14	90	14	90	NA	Negative
DTXSID3023344	nafronyl	CCN(CC)CCOC(=O)C(CC1CCCO1)CC1=CC=CC2=CC=CC=C12	1	231	1	231	1	231	1	231	1	231	1	231	NA	Negative
DTXSID8023345	nalbuphine	O[C@H]1CC[C@@]2(O)[C@H]3CC4=C5C(O[C@@H]1[C@@]25CCN3CC1CCC1)=C(O)C=C4	1	232	1	232	1	232	2	232	2	232	2	232	NA	Negative
DTXSID1023360	neostigmine	CN(C)C(=O)OC1=CC=CC(=C1)[N+](C)(C)C	1	233	1	233	1	233	1	233	1	233	1	233	NA	Negative
DTXSID5023376	nizatidine	CNC(NCCSCC1=CSC(CN(C)C)=N1)=C[N+]([O-])=O	1	236	1	236	1	236	1	236	1	236	1	236	NA	Negative
DTXSID4023389	oleandomycin	CO[C@H]1C[C@H](O[C@H]2[C@H](C)[C@@H](O[C@@H]3O[C@H](C)C[C@@H]([C@H]3O)N(C)C)[C@@H](C)C[C@]3(CO3)C(=O)[C@H](C)[C@@H](O)[C@@H](C)[C@@H](C)OC(=O)[C@@H]2C)O[C@@H](C)[C@@H]1O	1	237	1	237	1	237	1	237	3	163	3	163	NA	Negative
DTXSID8023393	ondansetron	CN1C2=C(C3=CC=CC=C13)C(=O)C(CN1C=CN=C1C)CC2	1	238	1	238	1	238	1	238	1	238	1	238	NA	Negative
DTXSID3023396	orphenadrine	CN(C)CCOC(C1=CC=CC=C1)C1=C(C)C=CC=C1	1	239	2	156	2	156	2	156	6	161	38	6	NA	Negative
DTXSID3023398	oxamniquine	CC(C)NCC1CCC2=CC(CO)=C(C=C2N1)[N+]([O-])=O	1	240	1	240	1	240	1	240	1	240	1	240	NA	Negative
DTXSID5023403	oxolamine	CCN(CC)CCC1=NC(=NO1)C1=CC=CC=C1	1	241	1	241	1	241	1	241	1	241	1	241	NA	Negative
DTXSID9023413	paclitaxel	CC(=O)O[C@@H]1C2=C(C)[C@H](C[C@@](O)([C@@H](OC(=O)C3=CC=CC=C3)[C@@H]3[C@@]4(CO[C@@H]4C[C@H](O)[C@@]3(C)C1=O)OC(C)=O)C2(C)C)OC(=O)[C@H](O)[C@@H](NC(=O)C1=CC=CC=C1)C1=CC=CC=C1	1	242	1	242	1	242	1	242	1	242	1	242	NA	Negative
DTXSID8023424	paromomycin	NC[C@@H]1O[C@H](O[C@@H]2[C@@H](CO)O[C@@H](O[C@@H]3[C@@H](O)[C@H](N)C[C@H](N)[C@H]3O[C@H]3O[C@H](CO)[C@@H](O)[C@H](O)[C@H]3N)[C@@H]2O)[C@H](N)[C@@H](O)[C@@H]1O	1	245	1	245	1	245	2	245	3	84	4	84	NA	Negative
DTXSID3023425	paroxetine	FC1=CC=C(C=C1)[C@@H]1CCNC[C@H]1COC1=CC2=C(OCO2)C=C1	1	246	1	246	1	246	1	246	1	246	1	246	NA	Negative
DTXSID7023431	pentamidine	NC(=N)C1=CC=C(OCCCCCOC2=CC=C(C=C2)C(N)=N)C=C1	1	247	1	247	1	247	1	247	1	247	1	247	NA	Negative
DTXSID2023434	pentetic acid	OC(=O)CN(CCN(CC(O)=O)CC(O)=O)CCN(CC(O)=O)CC(O)=O	1	248	1	248	1	248	1	248	1	248	1	248	NA	Negative
DTXSID7023437	pentoxifylline	CN1C=NC2=C1C(=O)N(CCCCC(C)=O)C(=O)N2C	1	249	1	249	1	249	1	249	1	249	1	249	NA	Negative
DTXSID7023439	perhexiline	C(C(C1CCCCC1)C1CCCCC1)C1CCCCN1	1	250	1	250	1	250	1	250	1	250	1	250	Positive	NA
DTXSID1023441	perphenazine	OCCN1CCN(CCCN2C3=CC=CC=C3SC3=C2C=C(Cl)C=C3)CC1	1	251	1	251	3	125	7	125	7	125	9	125	Positive	NA
DTXSID6023448	phenethicillin	CC(OC1=CC=CC=C1)C(=O)N[C@H]1[C@H]2SC(C)(C)[C@@H](N2C1=O)C(O)=O	1	252	1	252	2	252	8	90	14	90	14	90	NA	Negative
DTXSID1023449	phenformin	NC(=N)NC(=N)NCCC1=CC=CC=C1	1	253	1	253	1	253	1	253	1	253	1	253	NA	Negative
DTXSID0023454	pheniramine	CN(C)CCC(C1=CC=CC=C1)C1=NC=CC=C1	1	254	1	254	1	254	2	161	6	161	38	6	NA	Negative
DTXSID0023458	phenoxybenzamine	CC(COC1=CC=CC=C1)N(CCCl)CC1=CC=CC=C1	1	255	1	255	1	255	1	255	1	255	1	255	Positive	NA
DTXSID4023460	phensuximide	CN1C(=O)CC(C1=O)C1=CC=CC=C1	1	256	1	256	1	256	1	256	1	256	2	256	NA	Negative
DTXSID4023462	phentolamine	CC1=CC=C(C=C1)N(CC1=NCCN1)C1=CC(O)=CC=C1	1	257	1	257	1	257	1	257	2	92	2	92	NA	Negative
DTXSID8023470	phthalylsulfathiazole	OC(=O)C1=C(C=CC=C1)C(=O)NC1=CC=C(C=C1)S(=O)(=O)NC1=NC=CS1	1	258	1	258	1	258	1	258	1	258	1	258	NA	Negative
DTXSID3023471	physostigmine	CNC(=O)OC1=CC2=C(C=C1)N(C)[C@H]1N(C)CC[C@@]21C	1	259	1	259	1	259	1	259	1	259	1	259	NA	Negative
DTXSID8023474	pimozide	FC1=CC=C(C=C1)C(CCCN1CCC(CC1)N1C(=O)NC2=C1C=CC=C2)C1=CC=C(F)C=C1	1	260	1	260	1	260	2	260	2	260	2	260	Positive	NA
DTXSID8023476	pindolol	CC(C)NCC(O)COC1=C2C=CNC2=CC=C1	1	261	1	261	1	261	1	261	1	261	1	261	NA	Negative
DTXSID3023479	pipemidic acid	CCN1C=C(C(O)=O)C(=O)C2=C1N=C(N=C2)N1CCNCC1	1	262	1	262	1	262	6	344	6	344	7	34	NA	Negative
DTXSID7023481	piperacetazine	CC(=O)C1=CC2=C(SC3=CC=CC=C3N2CCCN2CCC(CCO)CC2)C=C1	1	263	1	263	1	263	1	263	1	263	1	263	NA	Negative
DTXSID7023487	pirenzepine	CN1CCN(CC(=O)N2C3=CC=CC=C3C(=O)NC3=C2N=CC=C3)CC1	1	264	1	264	1	264	1	264	1	264	2	264	NA	Negative
DTXSID2023488	piretanide	NS(=O)(=O)C1=C(OC2=CC=CC=C2)C(=CC(=C1)C(O)=O)N1CCCC1	1	265	1	265	1	265	1	265	1	265	1	265	NA	Negative
DTXSID6023490	pizotyline	CN1CCC(CC1)=C1C2=C(CCC3=CC=CC=C13)SC=C2	1	266	1	266	1	266	1	266	2	205	2	205	Positive	NA
DTXSID7023510	primidone	CCC1(C(=O)NCNC1=O)C1=CC=CC=C1	1	267	1	267	1	267	1	267	1	267	1	267	NA	Negative
DTXSID7023512	procainamide	CCN(CC)CCNC(=O)C1=CC=C(N)C=C1	1	268	1	268	1	268	3	410	4	133	4	133	NA	Negative
DTXSID2023515	procyclidine	OC(CCN1CCCC1)(C1CCCCC1)C1=CC=CC=C1	1	270	1	270	1	270	1	270	10	502	38	6	NA	Negative
DTXSID7023516	proglumide	CCCN(CCC)C(=O)C(CCC(O)=O)NC(=O)C1=CC=CC=C1	1	271	1	271	1	271	1	271	2	271	2	271	NA	Negative
DTXSID7023518	promethazine	CC(CN1C2=C(SC3=C1C=CC=C3)C=CC=C2)N(C)C	1	272	1	272	1	272	1	272	1	272	9	125	NA	Negative
DTXSID5023536	proxyphylline	CC(O)CN1C=NC2=C1C(=O)N(C)C(=O)N2C	1	274	1	274	1	274	2	274	3	54	3	54	NA	Negative
DTXSID4023541	pyridoxine	CC1=C(O)C(CO)=C(CO)C=N1	1	276	1	276	1	276	1	276	1	276	1	276	NA	Negative
DTXSID9023548	quinethazone	CCC1NC(=O)C2=CC(=C(Cl)C=C2N1)S(N)(=O)=O	1	277	1	277	1	277	2	277	2	277	2	277	NA	Negative
DTXSID3023550	raloxifene	OC1=CC=C(C=C1)C1=C(C(=O)C2=CC=C(OCCN3CCCCC3)C=C2)C2=CC=C(O)C=C2S1	1	279	1	279	1	279	1	279	1	279	1	279	Positive	NA
DTXSID3023552	repaglinide	CCOC1=C(C=CC(CC(=O)N[C@@H](CC(C)C)C2=C(C=CC=C2)N2CCCCC2)=C1)C(O)=O	1	280	1	280	1	280	1	280	1	280	1	280	NA	Negative
DTXSID3023554	rescinnamine	[H][C@]12C[C@@H](OC(=O)\C=C\C3=CC(OC)=C(OC)C(OC)=C3)[C@H](OC)[C@@H](C(=O)OC)[C@@]1([H])C[C@@]1([H])N(CCC3=C1NC1=C3C=CC(OC)=C1)C2	1	281	1	281	1	281	1	281	3	46	38	6	NA	Negative
DTXSID8023557	ribavirin	NC(=O)C1=NN(C=N1)[C@@H]1O[C@H](CO)[C@@H](O)[C@H]1O	1	282	1	282	1	282	1	282	1	282	1	282	NA	Negative
DTXSID7023568	rolitetracycline	CN(C)[C@H]1[C@@H]2CC3C(=C(O)[C@]2(O)C(=O)C(C(=O)NCN2CCCC2)=C1O)C(=O)C1=C(C=CC=C1O)[C@@]3(C)O	1	283	7	127	7	127	7	127	7	127	8	127	NA	Negative
DTXSID0023581	simvastatin	CCC(C)(C)C(=O)O[C@H]1C[C@@H](C)C=C2C=C[C@H](C)[C@H](CC[C@@H]3C[C@@H](O)CC(=O)O3)[C@@H]12	1	285	2	26	2	26	2	26	2	26	2	26	NA	Negative
DTXSID4023591	sparteine	[H][C@]12C[C@@]([H])(CN3CCCC[C@]3([H])C1)[C@]1([H])CCCCN21	1	286	1	286	1	286	1	286	1	286	2	286	NA	Negative
DTXSID9023592	spectinomycin	CN[C@@H]1[C@H](O)[C@H](NC)[C@H]2O[C@]3(O)[C@@H](O[C@H](C)CC3=O)O[C@@H]2[C@H]1O	1	287	1	287	1	287	1	287	1	287	1	287	NA	Negative
DTXSID5023615	sulfamethizole	CC1=NN=C(NS(=O)(=O)C2=CC=C(N)C=C2)S1	1	290	1	290	1	290	5	290	5	290	7	290	NA	Negative
DTXSID0023618	sulfinpyrazone	O=C1C(CCS(=O)C2=CC=CC=C2)C(=O)N(N1C1=CC=CC=C1)C1=CC=CC=C1	1	291	1	291	1	291	1	291	1	291	4	36	NA	Negative
DTXSID3023639	terazosin	COC1=C(OC)C=C2C(N)=NC(=NC2=C1)N1CCN(CC1)C(=O)C1CCCO1	1	293	2	565	3	159	3	159	4	159	4	159	NA	Negative
DTXSID2023642	terfenadine	CC(C)(C)C1=CC=C(C=C1)C(O)CCCN1CCC(CC1)C(O)(C1=CC=CC=C1)C1=CC=CC=C1	1	294	1	294	1	294	4	402	10	502	38	6	Positive	NA
DTXSID1023655	thioproperazine	CN(C)S(=O)(=O)C1=CC2=C(SC3=CC=CC=C3N2CCCN2CCN(C)CC2)C=C1	1	296	1	296	1	296	7	125	7	125	9	125	NA	Negative
DTXSID0023660	thiphenamil	CCN(CC)CCSC(=O)C(C1=CC=CC=C1)C1=CC=CC=C1	1	298	1	298	1	298	1	298	6	161	38	6	NA	Negative
DTXSID0023668	ticarcillin	CC1(C)S[C@@H]2[C@H](NC(=O)[C@H](C(O)=O)C3=CSC=C3)C(=O)N2[C@H]1C(O)=O	1	299	1	299	1	299	1	299	14	90	14	90	NA	Negative
DTXSID4023676	tinidazole	CCS(=O)(=O)CCN1C(C)=NC=C1[N+]([O-])=O	1	300	1	300	1	300	1	300	1	300	1	300	NA	Negative
DTXSID3023683	tolazoline	C(C1=NCCN1)C1=CC=CC=C1	1	301	1	301	1	301	2	301	2	301	3	301	NA	Negative
DTXSID2023690	torsemide	CC(C)NC(=O)NS(=O)(=O)C1=C(NC2=CC(C)=CC=C2)C=CN=C1	1	302	1	302	1	302	1	302	1	302	1	302	NA	Negative
DTXSID2023694	tranylcypromine	N[C@@H]1C[C@H]1C1=CC=CC=C1	1	303	1	303	1	303	1	303	1	303	1	303	NA	Negative
DTXSID7023699	trichlormethiazide	NS(=O)(=O)C1=C(Cl)C=C2NC(NS(=O)(=O)C2=C1)C(Cl)Cl	1	304	3	21	4	21	4	21	7	21	7	21	NA	Negative
DTXSID9023704	triflupromazine	CN(C)CCCN1C2=CC=CC=C2SC2=CC=C(C=C12)C(F)(F)F	1	305	1	305	1	305	7	125	7	125	9	125	NA	Negative
DTXSID4023705	trihexyphenidyl	OC(CCN1CCCCC1)(C1CCCCC1)C1=CC=CC=C1	1	306	2	402	3	402	4	402	10	502	38	6	NA	Negative
DTXSID8023715	trimipramine	CC(CN(C)C)CN1C2=C(CCC3=C1C=CC=C3)C=CC=C2	1	307	1	307	1	307	2	307	2	307	2	307	Positive	NA
DTXSID3023716	trioxsalen	CC1=CC2=CC3=C(OC(=O)C=C3C)C(C)=C2O1	1	308	1	308	1	308	1	308	1	308	1	308	NA	Negative
DTXSID3023718	triprolidine	CC1=CC=C(C=C1)C(=C/CN1CCCC1)\C1=CC=CC=N1	1	309	1	309	1	309	1	309	1	309	1	309	NA	Negative
DTXSID8023719	troglitazone	CC1=C(O)C(C)=C2CCC(C)(COC3=CC=C(CC4SC(=O)NC4=O)C=C3)OC2=C1C	1	310	1	310	1	310	1	310	1	310	1	310	NA	Negative
DTXSID6023733	valproic acid	CCCC(CCC)C(O)=O	1	311	1	311	1	311	1	311	1	311	1	311	NA	Negative
DTXSID6023733	valproic acid	CCCC(CCC)C(O)=O	1	311	1	311	1	311	1	311	1	311	1	311	NA	Negative
DTXSID6023733	valproic acid	CCCC(CCC)C(O)=O	1	311	1	311	1	311	1	311	1	311	1	311	NA	Negative
DTXSID6023733	valproic acid	CCCC(CCC)C(O)=O	1	311	1	311	1	311	1	311	1	311	1	311	NA	Negative
DTXSID0023741	viomycin	NCCC[C@H](N)CC(=O)N[C@H]1CNC(=O)[C@@H](NC(=O)\C(NC(=O)[C@H](CO)NC(=O)[C@H](CO)NC1=O)=C\NC(N)=O)[C@H]1C[C@H](O)N=C(N)N1	1	312	1	312	1	312	1	312	1	312	1	312	NA	Negative
DTXSID9023754	zomepirac	CN1C(CC(O)=O)=CC(C)=C1C(=O)C1=CC=C(Cl)C=C1	1	313	1	313	1	313	2	313	2	313	3	204	NA	Negative
DTXSID8024733	carisoprodol	CCCC(C)(COC(N)=O)COC(=O)NC(C)C	1	314	1	314	1	314	1	314	1	314	1	314	NA	Negative
DTXSID6024882	cycloheximide	C[C@H]1C[C@H](C)C(=O)[C@@H](C1)[C@H](O)CC1CC(=O)NC(=O)C1	1	315	1	315	1	315	1	315	1	315	1	315	Positive	NA
DTXSID3025257	ethacrynic acid	CCC(=C)C(=O)C1=CC=C(OCC(O)=O)C(Cl)=C1Cl	1	316	1	316	1	316	1	316	1	316	1	316	Positive	NA
DTXSID0025818	oxethazaine	CN(C(=O)CN(CCO)CC(=O)N(C)C(C)(C)CC1=CC=CC=C1)C(C)(C)CC1=CC=CC=C1	1	319	1	319	1	319	1	319	1	319	1	319	NA	Negative
DTXSID8026060	sulfacetamide	CC(=O)NS(=O)(=O)C1=CC=C(N)C=C1	1	320	2	320	2	320	2	320	2	320	7	290	NA	Negative
DTXSID8026064	sulfamethoxazole	CC1=CC(NS(=O)(=O)C2=CC=C(N)C=C2)=NO1	1	321	1	321	1	321	5	290	5	290	7	290	NA	Negative
DTXSID3026067	sulfapyridine	NC1=CC=C(C=C1)S(=O)(=O)NC1=CC=CC=N1	1	322	1	322	1	322	1	322	1	322	1	322	NA	Negative
DTXSID8026068	sulfathiazole	NC1=CC=C(C=C1)S(=O)(=O)NC1=NC=CS1	1	323	1	323	1	323	5	290	5	290	7	290	NA	Negative
DTXSID3029869	bezafibrate	CC(C)(OC1=CC=C(CCNC(=O)C2=CC=C(Cl)C=C2)C=C1)C(O)=O	1	324	1	324	1	324	1	324	1	324	1	324	NA	Negative
DTXSID7029871	clotrimazole	ClC1=C(C=CC=C1)C(N1C=CN=C1)(C1=CC=CC=C1)C1=CC=CC=C1	1	325	1	325	1	325	1	325	1	325	1	325	Positive	NA
DTXSID7029879	ketoconazole	CC(=O)N1CCN(CC1)C1=CC=C(OC[C@H]2CO[C@@](CN3C=CN=C3)(O2)C2=CC=C(Cl)C=C2Cl)C=C1	1	327	1	327	1	327	1	327	1	327	2	327	NA	Negative
DTXSID0032029	scopolamine hydrobromide	Br.CN1[C@H]2C[C@@H](C[C@@H]1[C@H]1O[C@@H]21)OC(=O)[C@H](CO)C1=CC=CC=C1	1	328	1	328	1	328	2	328	2	328	38	6	NA	Negative
DTXSID2033314	chlorhexidine	ClC1=CC=C(NC(=N)NC(=N)NCCCCCCNC(=N)NC(=N)NC2=CC=C(Cl)C=C2)C=C1	1	329	1	329	1	329	1	329	1	329	1	329	Positive	NA
DTXSID8034376	denatonium benzoate	[O-]C(=O)C1=CC=CC=C1.CC[N+](CC)(CC(=O)NC1=C(C)C=CC=C1C)CC1=CC=CC=C1	1	332	1	332	1	332	1	332	1	332	1	332	NA	Negative
DTXSID9035175	kinetin	C(NC1=C2N=CN=C2N=CN1)C1=CC=CO1	1	333	1	333	1	333	1	333	1	333	1	333	NA	Negative
DTXSID8036788	puromycin	COC1=CC=C(C[C@H](N)C(=O)N[C@@H]2[C@@H](CO)O[C@H]([C@@H]2O)N2C=NC3=C2N=CN=C3N(C)C)C=C1	1	335	1	335	1	335	1	335	1	335	1	335	Positive	NA
DTXSID3037044	amoxicillin	[H][C@]12SC(C)(C)[C@@H](N1C(=O)[C@H]2NC(=O)[C@H](N)C1=CC=C(O)C=C1)C(O)=O	1	336	2	90	3	90	8	90	14	90	14	90	NA	Negative
DTXSID6037063	trichostatin a	C[C@H](\C=C(/C)\C=C\C(=O)NO)C(=O)C1=CC=C(C=C1)N(C)C	1	337	1	337	1	337	1	337	1	337	1	337	NA	Negative
DTXSID6037063	trichostatin a	C[C@H](\C=C(/C)\C=C\C(=O)NO)C(=O)C1=CC=C(C=C1)N(C)C	1	337	1	337	1	337	1	337	1	337	1	337	NA	Negative
DTXSID4037168	mefloquine	O[C@H]([C@H]1CCCCN1)C1=CC(=NC2=C1C=CC=C2C(F)(F)F)C(F)(F)F	1	338	1	338	1	338	1	338	1	338	1	338	Positive	NA
DTXSID1037197	captopril	C[C@H](CS)C(=O)N1CCC[C@H]1C(O)=O	1	339	1	339	1	339	1	339	1	339	1	339	NA	Negative
DTXSID3037250	nimesulide	CS(=O)(=O)NC1=CC=C(C=C1OC1=CC=CC=C1)[N+]([O-])=O	1	340	1	340	1	340	1	340	1	340	1	340	NA	Negative
DTXSID1037272	tacrine	NC1=C2CCCCC2=NC2=C1C=CC=C2	1	341	1	341	2	341	2	341	2	341	2	341	NA	Negative
DTXSID6037649	deferoxamine mesylate	CS(O)(=O)=O.CC(=O)N(O)CCCCCNC(=O)CCC(=O)N(O)CCCCCNC(=O)CCC(=O)N(O)CCCCCN	1	342	1	342	1	342	1	342	1	342	1	342	NA	Negative
DTXSID9040134	vincamine	CC[C@@]12CCCN3CCC4=C([C@H]13)N(C1=C4C=CC=C1)[C@](O)(C2)C(=O)OC	1	345	1	345	1	345	1	345	1	345	38	6	NA	Negative
DTXSID7040362	niclosamide	OC1=C(C=C(Cl)C=C1)C(=O)NC1=CC=C(C=C1Cl)[N+]([O-])=O	1	346	1	346	1	346	1	346	1	346	1	346	Positive	NA
DTXSID2040446	chloroquine	CCN(CC)CCCC(C)NC1=C2C=CC(Cl)=CC2=NC=C1	1	347	1	347	1	347	1	347	1	347	1	347	NA	Negative
DTXSID1040459	bucladesine	CCCC(=O)NC1=NC=NC2=C1N=CN2[C@@H]1O[C@@H]2COP(O)(=O)O[C@H]2[C@H]1OC(=O)CCC	1	348	1	348	1	348	1	348	1	348	1	348	NA	Negative
DTXSID6040537	lisinopril	NCCCC[C@H](N[C@@H](CCC1=CC=CC=C1)C(O)=O)C(=O)N1CCC[C@H]1C(O)=O	1	349	1	349	1	349	1	349	1	349	1	349	NA	Negative
DTXSID2040579	parthenolide	CC1=CCC[C@@]2(C)O[C@H]2[C@H]2OC(=O)C(=C)[C@@H]2CC1	1	350	1	350	1	350	1	350	1	350	1	350	Positive	NA
[truncated: 235 more rows]

## Sheet: ARM_results
LHS	RHS	support	confidence	lift	count	oddsRatio	fishersExactTest
{bond:CX_halide_alkyl-X_tertiary}	{Positive}	0.00811688	0.833333	6.41667	5	35.6667	0.00017806
{bond:C(~Z)~C~Q_a-haloalcohol,bond:CC(=O)C_ketone_aliphatic_acyclic}	{Positive}	0.00649351	0.8	6.16	4	28.1579	0.0011988
[truncated: 233 more rows]

## Sheet: Chems_Containing_Rules
DTXSID	chem_name	LHS	RHS	support	confidence	lift	count	oddsRatio	fishersExactTest
[truncated: 1,050 more rows]
